# Supplementary material for: Phylogenetic comparative methods improve the selection of characters for generic delimitations in a hyperdiverse Neotropical orchid clade
Source: PubMed Central journal article supplement (PMC6805863; doi:10.1038/s41598-019-51360-0), 2019-10-22

## SUPPORTING INFORMATION

Manuscript title:

### Phylogenetic comparative methods improve the selection of characters for generic delimitations in a hyperdiverse Neotropical orchid lineage

Authors:

**Diego Bogarín<sup>1,2,3,\*</sup>, Oscar A. Pérez-Escobar<sup>4,5</sup>, Adam P. Karremans<sup>1,3</sup>, Melania Fernandez<sup>1,6</sup>, Jaco Kruizinga<sup>7</sup>, Franco Pupulin<sup>1,8</sup>, Erik Smets<sup>3,10,11</sup>, and Barbara Gravendeel<sup>3,9,10</sup>**

<sup>1</sup>Jardín Botánico Lankester, Universidad de Costa Rica, Cartago, Costa Rica

<sup>2</sup>Herbarium UCH, Universidad Autónoma de Chiriquí, Chiriquí, Panama

<sup>3</sup>Naturalis Biodiversity Center, Endless Forms group, Leiden, The Netherlands

<sup>4</sup>Comparative Plant and Fungal Biology, Royal Botanic Gardens, Kew, Richmond, Surrey TW9 3AB, UK

<sup>5</sup>Gothenburg Global Biodiversity Centre, Gothenburg, Sweden

<sup>6</sup> Department of Plant and Soil Science, Texas Tech University, Lubbock, TX 79409, U.S.A.

<sup>7</sup>Hortus botanicus, Leiden University, Leiden, The Netherlands

<sup>8</sup> Harvard University Herbaria, 22 Divinity Avenue, Cambridge, Massachusetts, U.S.A.; Marie Selby Botanical Gardens, 811 South Palm Avenue, Sarasota, Florida 34236, U.S.A.

<sup>9</sup>University of Applied Sciences Leiden, Faculty of Science and Technology, Leiden, The Netherlands

<sup>10</sup>Institute of Biology Leiden, Leiden University, Leiden, The Netherlands

<sup>11</sup>KU Leuven, Ecology, Evolution and Biodiversity Conservation, Leuven, Belgium

\*Corresponding author. E-mail: diego.bogarin@ucr.ac.cr

### Appendix S1-S15:

**Appendix S1.** Species, length of sequences in matrices, voucher information, Genbank accession numbers, references and incongruent terminals of the individuals analyzed.

| Taxon                                                          | Terminal name                      | Total length (bp) | ITS length (bp) | MATK length (bp) | Voucher      | Genbank (ITS) | Genbank (matK) | Incongruent terminal (ML) | Incongruent terminal (BI) |
|----------------------------------------------------------------|------------------------------------|-------------------|-----------------|------------------|--------------|---------------|----------------|---------------------------|---------------------------|
| <i>Acianthera cogniauxiana</i> (Schltr.) Pridgeon & M.W.Chase  | Acianthera_cogniauxiana_AK5879     | 1433              | 756             | 677              | AK5879       | KR816545      | KR816554       |                           |                           |
| <i>Acianthera fenestrata</i> (Barb.Rodr.) Pridgeon & M.W.Chase | Acianthera_fenestrata_JLOrchids_sn | 1564              | 798             | 766              | JLOrchids_sn | AF262857      | AF265468       |                           |                           |
| <i>Anathallis burzlaffiana</i> (Luer & Sijm) Luer              | Anathallis_burzlaffiana_AK4857     | 1564              | 798             | 766              | AK4857       | KC425727      | KC425857       |                           |                           |

|                                                                       |                                      |      |     |     |         |          |          |   |   |
|-----------------------------------------------------------------------|--------------------------------------|------|-----|-----|---------|----------|----------|---|---|
| <i>Anathallis lewisiae</i> (Ames) Solano & Soto Arenas                | Anathallis_lewisiae_DB1056           | 1564 | 798 | 766 | DB1056  | KC425733 | KC425858 |   |   |
| <i>Anathallis linearifolia</i> (Cogn.) Pridgeon & M.W.Chase           | Anathallis_linearifolia_JH2336       | 1564 | 798 | 766 | JH2336  | AF262869 | AF265473 |   |   |
| <i>Anathallis pabstii</i> (Garay) Pridgeon & M.W.Chase                | Anathallis_pabstii_AK4821            | 1564 | 798 | 766 | AK4821  | KC425737 | KC425859 |   |   |
| <i>Anathallis peroupavae</i> (Hoehne & Brade) F.Barros                | Anathallis_peroupavae_AK5759         | 1492 | 797 | 695 | AK5759  | KF747837 | MK306408 |   |   |
| <i>Anathallis rabei</i> (Foldats) Luer (1)                            | Anathallis_rabei_AK4794              | 1564 | 798 | 766 | AK4794  | KC425738 | KC425860 |   |   |
| <i>Anathallis rabei</i> (Foldats) Luer (2)                            | Anathallis_rabei_DB12050             | 1558 | 797 | 761 | DB12050 | MK306359 | MK306409 |   |   |
| <i>Draconanthes aberrans</i> (Schltr.) Luer                           | Draconanthes_aberrans_AK5978         | 1487 | 797 | 690 | AK5978  | KY988810 | KY988630 | X | X |
| <i>Fronitaria caulescens</i> (Lindl.) Luer                            | Fronitaria_caulescens_CL18778        | 1562 | 796 | 766 | CL18778 | AF262896 | AF265471 | X |   |
| <i>Gravendeelia chamaelepanthes</i> (Rchb.f.) Bogarín & Karremans (1) | Gravendeelia_chamaelepanthes_AK4815  | 797  | 797 | -   | AK5786  | MK306362 | -        |   |   |
| <i>Gravendeelia chamaelepanthes</i> (Rchb.f.) Bogarín & Karremans (2) | Gravendeelia_chamaelepanthes_AP127   | 1564 | 798 | 766 | AP127   | MK306363 | MK306410 | X | X |
| <i>Gravendeelia chamaelepanthes</i> (Rchb.f.) Bogarín & Karremans (3) | Gravendeelia_chamaelepanthes_DB11881 | 797  | 797 | -   | DB11881 | MK306364 | -        |   |   |
| <i>Gravendeelia chamaelepanthes</i> (Rchb.f.) Bogarín & Karremans (4) | Gravendeelia_chamaelepanthes_PL459a  | 797  | 797 | -   | PL459a  | MK306365 | -        |   |   |
| <i>Lankesteriana barbulata</i> (Lindl.) Karremans (1)                 | Lankesteriana_barbulata_AK5187       | 797  | 797 | -   | AK5187  | MK306366 | -        |   |   |
| <i>Lankesteriana barbulata</i> (Lindl.) Karremans (2)                 | Lankesteriana_barbulata_AK5447       | 797  | 797 | -   | AK5447  | MK306367 | -        |   |   |
| <i>Lankesteriana barbulata</i> (Lindl.) Karremans (3)                 | Lankesteriana_barbulata_AK5750       | 797  | 797 | -   | AK5750  | KF747834 | -        |   |   |
| <i>Lankesteriana barbulata</i> (Lindl.) Karremans (4)                 | Lankesteriana_barbulata_DB8606       | 797  | 797 | -   | DB8606  | KC425726 | -        |   |   |
| <i>Lankesteriana casualis</i> (Ames) Karremans                        | Lankesteriana_casualis_AK6190        | 1515 | 797 | 718 | AK6190  | KY988821 | KY988638 |   |   |
| <i>Lankesteriana cuspidata</i> (Luer) Karremans                       | Lankesteriana_cuspidata_DB9619       | 797  | 797 | -   | DB9619  | KF747835 | -        |   |   |
| <i>Lankesteriana duplooyi</i> Luer & Sayers) Karremans                | Lankesteriana_duplooyi_AK4888        | 797  | 797 | -   | AK4888  | KF747836 | -        |   |   |

|                                                                   |                                  |      |     |     |         |          |          |   |   |
|-------------------------------------------------------------------|----------------------------------|------|-----|-----|---------|----------|----------|---|---|
| <i>Lankesteriana fractiflexa</i> (Ames & C.Schweinf.) Karremans   | Lankesteriana_fractiflexa_DB8988 | 797  | 797 | -   | DB8988  | KC425729 | -        |   |   |
| <i>Lepanthes ankistra</i> Luer & Dressler                         | Lepanthes_ankistra_AK6147        | 1564 | 798 | 766 | AK6147  | KY988822 | KY988639 |   |   |
| <i>Lepanthes atrata</i> Endres ex Luer                            | Lepanthes_atrata_DB11053         | 1564 | 798 | 766 | DB11053 | KY988823 | KY988640 | X | X |
| <i>Lepanthes blephariglossa</i> Schltr.                           | Lepanthes_blephariglossa_DB9604  | 1564 | 798 | 766 | DB9604  | KY988824 | KY988641 | X | X |
| <i>Lepanthes blepharistes</i> Rchb.f.                             | Lepanthes_blepharistes_FP8720    | 1549 | 783 | 766 | FP8720  | KY988829 | KY988646 |   |   |
| <i>Lepanthes bradei</i> Schltr.                                   | Lepanthes_bradei_AK5267          | 1564 | 798 | 766 | AK5267  | KY988830 | KY988647 |   |   |
| <i>Lepanthes brunnescens</i> Luer                                 | Lepanthes_brunnescens_DB2994     | 1564 | 798 | 766 | DB2994  | KY988831 | KY988648 |   |   |
| <i>Lepanthes calliope</i> Luer & Hirtz                            | Lepanthes_calliope_DB11873       | 1564 | 798 | 766 | DB11873 | KY988832 | KY988649 |   |   |
| <i>Lepanthes calodyction</i> Hook.                                | Lepanthes_calodyction_DB11872    | 1564 | 798 | 766 | DB11872 | KY988833 | KY988650 |   |   |
| <i>Lepanthes candida</i> Endres ex Luer                           | Lepanthes_candida_DB11656        | 1564 | 798 | 766 | DB11656 | KY988834 | KY988651 |   |   |
| <i>Lepanthes caprimulgus</i> Luer                                 | Lepanthes_caprimulgus_DB11874    | 1564 | 798 | 766 | DB11874 | KY988835 | KY988652 |   |   |
| <i>Lepanthes cascajalensis</i> Ames                               | Lepanthes_cascajalensis_DB4836   | 1564 | 798 | 766 | DB4836  | KY988836 | KY988653 | X | X |
| <i>Lepanthes cloesii</i> Luer                                     | Lepanthes_cloesii_DB11877        | 1564 | 798 | 766 | DB11877 | KY988837 | KY988654 | X | X |
| <i>Lepanthes confusa</i> Ames & C.Schweinf.                       | Lepanthes_confusa_DB3087         | 1550 | 784 | 766 | DB3087  | KY988838 | KY988655 | X | X |
| <i>Lepanthes cribii</i> Pupulin                                   | Lepanthes_cribii_FP8711          | 1564 | 798 | 766 | FP8711  | KY988839 | KY988656 |   |   |
| <i>Lepanthes cuspidata</i> Luer                                   | Lepanthes_cuspidata_AK6239       | 1564 | 798 | 766 | AK6239  | KY988840 | KY988657 |   |   |
| <i>Lepanthes demissa</i> Luer                                     | Lepanthes_demissa_DB2981         | 1545 | 779 | 766 | DB2981  | KY988842 | KY988659 |   |   |
| <i>Lepanthes dikoensis</i> Bogarin & C.M.Sm.                      | Lepanthes_dikoensis_DB1625       | 1564 | 798 | 766 | DB1625  | KY988843 | KY988660 | X | X |
| <i>Lepanthes disticha</i> (A.Rich. & Galeotti) Garay & R.E.Schult | Lepanthes_disticha_AK4589        | 1564 | 798 | 766 | AK4589  | KY988845 | KY988661 |   | X |
| <i>Lepanthes dolabriformis</i> Luer                               | Lepanthes_dolabriformis_DB10375  | 1564 | 798 | 766 | DB10375 | KY988846 | KY988662 |   |   |
| <i>Lepanthes droseroides</i> Luer                                 | Lepanthes_droseroides_MF945      | 1564 | 798 | 766 | MF945   | KY988848 | KY988664 |   |   |
| <i>Lepanthes elata</i> Rchb.f.                                    | Lepanthes_elata_DB10554          | 1564 | 798 | 766 | DB10554 | KY988850 | KY988666 |   |   |
| <i>Lepanthes elegans</i> Luer                                     | Lepanthes_elegans_DB7606         | 1564 | 798 | 766 | DB7606  | KY988853 | KY988669 | X | X |
| <i>Lepanthes eximia</i> Ames                                      | Lepanthes_eximia_DB9600          | 1564 | 798 | 766 | DB9600  | KY988854 | KY988670 |   |   |
| <i>Lepanthes ferrelliae</i> Luer                                  | Lepanthes_ferrelliae_FP8806      | 1564 | 798 | 766 | FP8806  | KY988855 | KY988671 |   | X |
| <i>Lepanthes gargantua</i> Rchb.f.                                | Lepanthes_gargantua_DB11868      | 1564 | 798 | 766 | DB11868 | KY988856 | KY988672 | X | X |
| <i>Lepanthes glicensteinii</i> Luer                               | Lepanthes_glicensteinii_AK5818   | 1512 | 761 | 751 | AK5818  | KY988857 | KY988673 |   |   |

|                                                         |                                  |      |     |     |         |          |          |   |   |
|---------------------------------------------------------|----------------------------------|------|-----|-----|---------|----------|----------|---|---|
| <i>Lepanthes gustavomeroyi</i> Archila                  | Lepanthes_gustavomeroyi_DB11293  | 1564 | 798 | 766 | DB11293 | KY988859 | KY988675 |   | X |
| <i>Lepanthes hermansii</i> Luer                         | Lepanthes_hermansii_FP8611       | 1564 | 798 | 766 | FP8611  | KY988860 | KY988676 | X |   |
| <i>Lepanthes horichii</i> Luer                          | Lepanthes_horichii_AK5507        | 1564 | 798 | 766 | AK5507  | KY988861 | KY988677 | X | X |
| <i>Lepanthes kleinii</i> Bogarín & Pupulin              | Lepanthes_kleinii_FP7999         | 1564 | 798 | 766 | FP7999  | KY988862 | KY988678 | X | X |
| <i>Lepanthes latisejala</i> Ames & C.Schweinf.          | Lepanthes_latisejala_DB11102     | 1564 | 798 | 766 | DB11102 | KY988863 | KY988679 |   |   |
| <i>Lepanthes lindleyana</i> Oerst. & Rchb.f.            | Lepanthes_lindleyana_DB8392      | 1564 | 798 | 766 | DB8392  | KY988865 | KY988681 |   | X |
| <i>Lepanthes machogaffensis</i> Pupulin & D.Jiménez     | Lepanthes_machogaffensis_DB10522 | 1564 | 798 | 766 | DB10522 | KY988867 | KY988683 |   |   |
| <i>Lepanthes maduroi</i> Luer                           | Lepanthes_maduroi_DB2974         | 1564 | 798 | 766 | DB2974  | KY988868 | KY988684 |   |   |
| <i>Lepanthes martineae</i> Luer & Cloes                 | Lepanthes_martineae_DB11878      | 1564 | 798 | 766 | DB11878 | KY988869 | KY988685 |   |   |
| <i>Lepanthes matamorosii</i> Pupulin & Bogarín          | Lepanthes_matamorosii_AK5661     | 1564 | 798 | 766 | AK5661  | KY988870 | KY988686 |   |   |
| <i>Lepanthes mentosa</i> Luer                           | Lepanthes_mentosa_DB11533        | 1556 | 790 | 766 | DB11533 | KY988871 | KY988687 |   | X |
| <i>Lepanthes monteverdensis</i> Luer & R.Escobar        | Lepanthes_monteverdensis_DB11482 | 1564 | 798 | 766 | DB11482 | KY988872 | KY988688 |   |   |
| <i>Lepanthes montisnarae</i> Pupulin, Bogarín & C.M.Sm. | Lepanthes_montisnarae_AK6536     | 1564 | 798 | 766 | AK6536  | KY988873 | KY988689 | X | X |
| <i>Lepanthes myiophora</i> Luer                         | Lepanthes_myiophora_FP7971       | 1564 | 798 | 766 | FP7971  | KY988874 | KY988690 |   | X |
| <i>Lepanthes mystax</i> Luer & R.Escobar                | Lepanthes_mystax_DB11446         | 1564 | 798 | 766 | DB11446 | KY988875 | KY988691 |   | X |
| <i>Lepanthes nycteris</i> Luer & R.Vásquez              | Lepanthes_nycteris_DB11875       | 1564 | 798 | 766 | DB11875 | KY988876 | KY988692 |   |   |
| <i>Lepanthes olmosii</i> Bogarín                        | Lepanthes_olmosii_DB3005         | 1564 | 798 | 766 | DB3005  | KY988877 | KY988693 | X | X |
| <i>Lepanthes queveriensis</i> Bogarín & Pupulin         | Lepanthes_queveriensis_DB10854   | 1564 | 798 | 766 | DB10854 | KY988879 | KY988695 |   |   |
| <i>Lepanthes rafaelliana</i> Pupulin                    | Lepanthes_rafaelliana_DB11658    | 1564 | 798 | 766 | DB11658 | KY988880 | KY988696 |   | X |
| <i>Lepanthes regularis</i> Luer                         | Lepanthes_regularis_DB7756       | 1564 | 798 | 766 | DB7756  | KY988881 | KY988697 |   |   |
| <i>Lepanthes ribes</i> Luer                             | Lepanthes_ribes_AP153            | 1526 | 769 | 757 | AP153   | KY988882 | KY988698 | X | X |
| <i>Lepanthes saltatrix</i> Luer & Hirtz                 | Lepanthes_saltatrix_HBL26        | 1564 | 798 | 766 | HBL_26  | KY988883 | KY988699 |   |   |
| <i>Lepanthes sandiorum</i> Bogarín & Karremans          | Lepanthes_sandiorum_DB8171       | 1564 | 798 | 766 | DB8171  | KY988884 | KY988700 |   |   |
| <i>Lepanthes siboei</i> Bogarín & D.Jiménez             | Lepanthes_siboei_DB9927          | 1564 | 798 | 766 | DB9927  | KY988885 | KY988701 |   | X |

|                                                                    |                                   |      |     |     |          |          |          |   |   |
|--------------------------------------------------------------------|-----------------------------------|------|-----|-----|----------|----------|----------|---|---|
| <i>Lepanthes sijmii</i> Luer & Sijm                                | Lepanthes_sijmii_DB11879          | 1564 | 798 | 766 | DB11879  | KY988886 | KY988702 |   | X |
| <i>Lepanthes spadariae</i> Pupulin                                 | Lepanthes_spadariae_DB11676       | 1564 | 798 | 766 | DB11676  | KY988887 | KY988703 |   |   |
| <i>Lepanthes stenorrhyncha</i> Luer                                | Lepanthes_stenorrhyncha_DB11517   | 1564 | 798 | 766 | DB11517  | KY988888 | KY988704 |   |   |
| <i>Lepanthes terborchii</i> Luer & Sijm                            | Lepanthes_terborchii_DB11876      | 1564 | 798 | 766 | DB11876  | KY988889 | KY988705 |   |   |
| <i>Lepanthes tristis</i> Bogarín & Pupulin                         | Lepanthes_tristis_DB11294         | 1564 | 798 | 766 | DB11294  | KY988890 | KY988706 | X | X |
| <i>Lepanthes turialvae</i> Rchb.f.                                 | Lepanthes_turialvae_DB2394        | 1564 | 798 | 766 | DB2394   | KY988891 | KY988707 | X | X |
| <i>Lepanthes variabilis</i> C.M.Sm., Pupulin & D.Jiménez           | Lepanthes_variabilis_AK6380       | 1564 | 798 | 766 | AK6380   | KY988892 | KY988708 |   |   |
| <i>Lepanthes velosa</i> Luer & Hirtz                               | Lepanthes_velosa_FP6504           | 1564 | 798 | 766 | FP6504   | KY988893 | KY988709 |   |   |
| <i>Lepanthes whittenii</i> Pupulin & Bogarín                       | Lepanthes_whittenii_MF909         | 1564 | 798 | 766 | MF909    | KY988895 | KY988711 |   |   |
| <i>Lepanthes williamsii</i> Salazar & Soto Arenas                  | Lepanthes_williamsii_DB11292      | 1564 | 798 | 766 | DB11292  | KY988896 | KY988712 | X | X |
| <i>Lepanthes woodburyana</i> Stimson                               | Lepanthes_woodburyana_JH2931      | 1564 | 798 | 766 | JH2931   | AF262890 | AF265472 | X | X |
| <i>Lepanthopsis apoda</i> (Garay & Dunst.) Luer                    | Lepanthopsis_apoda_AP126          | 1564 | 798 | 766 | AP126    | KF747841 | MK306411 | X | X |
| <i>Lepanthopsis astrophora</i> Garay (1)                           | Lepanthopsis_astrophora_AK5766    | 1505 | 797 | 708 | AK5766   | MK306368 | MK306412 |   |   |
| <i>Lepanthopsis floripecten</i> (Rchb.f.) Ames (1)                 | Lepanthopsis_floripecten_AK3006   | 1564 | 798 | 766 | DB7795   | KY988898 | MK306413 |   |   |
| <i>Lepanthopsis floripecten</i> (Rchb.f.) Ames (2)                 | Lepanthopsis_floripecten_CvdB2063 | 1548 | 797 | 751 | AK3006   | KY988897 | KY988713 |   |   |
| <i>Lepanthopsis floripecten</i> (Rchb.f.) Ames (3)                 | Lepanthopsis_floripecten_DB7795   | 773  | 773 | -   | CvdB2063 | JQ306336 | -        |   |   |
| <i>Lepanthopsis obliquipetala</i> (Ames & C.Schweinf.) Luer        | Lepanthopsis_obliquipetala_AK5626 | 1564 | 798 | 766 | AK5626   | MK306369 | MK306414 |   |   |
| <i>Lepanthopsis prolifera</i> Garay                                | Lepanthopsis_prolifera_AK5722     | 797  | 797 | -   | AK5722   | MK306370 | -        |   |   |
| <i>Lepanthopsis ubanguii</i> Luer                                  | Lepanthopsis_ubanguii_HBL         | 797  | 797 | -   | HBL_sn   | MK306371 | -        |   |   |
| <i>Opilionanthe manningii</i> (Luer) Karremans & Bogarín           | Opilionanthe_manningii_DB11883    | 1564 | 798 | 766 | DB11883  | MK306372 | MK306415 | X | X |
| <i>Pendusalpinx berlineri</i> (Luer) Karremans & Mel.Fernández (1) | Pendusalpinx_berlineri_AK5770     | 1518 | 797 | 721 | AK5770   | KY988984 | KY988792 |   |   |
| <i>Pendusalpinx berlineri</i> (Luer) Karremans & Mel.Fernández (1) | Pendusalpinx_berlineri_JH1605     | 1561 | 795 | 766 | JH1605   | AF262900 | AF265475 |   |   |

|                                                                    |                                             |      |     |     |               |          |          |  |  |
|--------------------------------------------------------------------|---------------------------------------------|------|-----|-----|---------------|----------|----------|--|--|
| <i>Pendusalpinx dependens</i> (Luer) Karremans & Mel.Fernández (1) | Pendusalpinx_dep<br>endens_CvdB201<br>1     | 797  | 797 | -   | CvdB2011      | JQ306456 | -        |  |  |
| <i>Pendusalpinx dependens</i> (Luer) Karremans & Mel.Fernández (2) | Pendusalpinx_dep<br>endens_AK4866           | 797  | 797 | -   | AK4866        | MK306373 | -        |  |  |
| <i>Pendusalpinx patula</i> (Luer) Karremans & Mel.Fernández        | Pendusalpinx_pat<br>ula_HBL41               | 797  | 797 | -   | HBL_41        | MK306374 | -        |  |  |
| <i>Pendusalpinx sijmii</i> (Luer) Karremans & Mel.Fernández        | Pendusalpinx_siji<br>mii_AK5994             | 1540 | 797 | 743 | AK5994        | KY988993 | KY988801 |  |  |
| <i>Pendusalpinx</i> sp.                                            | Pendusalpinx_sp_<br>HBL39                   | 797  | 797 | -   | HBL_39        | MK306375 | -        |  |  |
| <i>Pendusalpinx</i> sp.                                            | Pendusalpinx_sp_<br>HBL40                   | 797  | 797 | -   | HBL_40        | MK306376 | -        |  |  |
| <i>Pendusalpinx vasquezii</i> (Luer) Karremans & Mel.Fernández     | Pendusalpinx_vas<br>quezii_AK6496           | 797  | 797 | -   | AK6496        | MK306377 | -        |  |  |
| <i>Pseudolepanthes colombiae</i> Archila (1)                       | Pseudolepanthes_<br>colombiae_AK64<br>55    | 1552 | 797 | 755 | AK6455        | MK306378 | MK306416 |  |  |
| <i>Pseudolepanthes colombiae</i> Archila (2)                       | Pseudolepanthes_<br>colombiae_AK64<br>56    | 1564 | 798 | 766 | AK6456        | MK306379 | MK306417 |  |  |
| <i>Pseudolepanthes colombiae</i> Archila (3)                       | Pseudolepanthes_<br>colombiae_AK64<br>58    | 1564 | 798 | 766 | AK6458        | MK306380 | MK306418 |  |  |
| <i>Stellmaris pergrata</i> (Ames) Mel.Fernández & Bogarín (1)      | Stellmaris_pergr<br>ata_DB12038             | 1551 | 797 | 754 | DB12038       | MK306381 | MK306419 |  |  |
| <i>Stellmaris pergrata</i> (Ames) Mel.Fernández & Bogarín (2)      | Stellmaris_pergr<br>ata_DB5635              | 1564 | 798 | 766 | DB5635        | MK306382 | MK306420 |  |  |
| <i>Stellmaris pergrata</i> (Ames) Mel.Fernández & Bogarín (3)      | Stellmaris_pergr<br>ata_DB6502              | 1564 | 798 | 766 | DB6502        | MK306383 | MK306421 |  |  |
| <i>Trichosalpinx blaisdellii</i> (S.Watson) Luer (1)               | Trichosalpinx_bla<br>isdellii_AK5308        | 1547 | 781 | 766 | AK5308        | MK306384 | MK306422 |  |  |
| <i>Trichosalpinx blaisdellii</i> (S.Watson) Luer (2)               | Trichosalpinx_bla<br>isdellii_DB292         | 1564 | 798 | 766 | DB292         | MK306385 | MK306423 |  |  |
| <i>Trichosalpinx blaisdellii</i> (S.Watson) Luer (3)               | Trichosalpinx_bla<br>isdellii_K1997741<br>2 | 1564 | 798 | 766 | K1997741<br>2 | MK306386 | MK306424 |  |  |
| <i>Trichosalpinx blaisdellii</i> (S.Watson) Luer (4)               | Trichosalpinx_bla<br>isdellii_MF2           | 1564 | 798 | 766 | MF2           | MK306387 | MK306425 |  |  |
| <i>Trichosalpinx memor</i> (Rchb.f.) Luer (1)                      | Trichosalpinx_me<br>mor_DB6462              | 1564 | 798 | 766 | DB6462        | MK306388 | MK306426 |  |  |
| <i>Trichosalpinx memor</i> (Rchb.f.) Luer (2)                      | Trichosalpinx_me<br>mor_DB8696              | 1564 | 798 | 766 | DB8696        | KY988987 | KY988795 |  |  |

|                                                                 |                                   |      |     |     |          |          |          |   |   |
|-----------------------------------------------------------------|-----------------------------------|------|-----|-----|----------|----------|----------|---|---|
| <i>Trichosalpinx minutipetala</i> (Ames & C.Schweinf.) Luer (1) | Trichosalpinx_minutipetala_FP7581 | 1564 | 798 | 766 | FP7581   | MK306389 | MK306427 |   |   |
| <i>Trichosalpinx minutipetala</i> (Ames & C.Schweinf.) Luer (2) | Trichosalpinx_minutipetala_MF446  | 1522 | 797 | 725 | MF446    | MK306390 | MK306428 |   |   |
| <i>Trichosalpinx orbicularis</i> (Lindl.) Luer (1)              | Trichosalpinx_orbicularis_AR6474  | 1564 | 798 | 766 | AR6474   | KY988989 | KY988797 |   |   |
| <i>Trichosalpinx orbicularis</i> (Lindl.) Luer (2)              | Trichosalpinx_orbicularis_JH1349  | 1564 | 798 | 766 | JH1349   | AF262886 | AF265476 |   |   |
| <i>Trichosalpinx orbicularis</i> (Lindl.) Luer (3)              | Trichosalpinx_orbicularis_MF65b   | 1564 | 798 | 766 | MF65b    | MK306391 | MK306429 |   |   |
| <i>Trichosalpinx pringlei</i> (Schltr.) Luer (1)                | Trichosalpinx_pringlei_AK6463     | 1564 | 798 | 766 | AK6463   | MK306392 | MK306430 |   |   |
| <i>Trichosalpinx pringlei</i> (Schltr.) Luer (2)                | Trichosalpinx_pringlei_AK6706     | 1564 | 798 | 766 | AK6706   | MK306393 | MK306431 |   |   |
| <i>Trichosalpinx reflexa</i> Mel.Fernández & Bogarín (1)        | Trichosalpinx_reflexa_DB4075      | 1564 | 798 | 766 | DB4075   | KY988991 | KY988799 |   |   |
| <i>Trichosalpinx reflexa</i> Mel.Fernández & Bogarín (2)        | Trichosalpinx_reflexa_MF195       | 1564 | 798 | 766 | MF195    | KY988992 | KY988800 |   |   |
| <i>Trichosalpinx ringens</i> Luer                               | Trichosalpinx_ringens_MF577       | 1564 | 798 | 766 | MF577    | MK306394 | MK306432 | X | X |
| <i>Trichosalpinx rotundata</i> (C.Schweinf.) Dressler           | Trichosalpinx_rotundata_AK4386a   | 1564 | 798 | 766 | AK4386a  | MK306395 | MK306433 |   |   |
| <i>Tubella alabastra</i> (Luer & R.Escobar) Archila             | Tubella_alabastra_AK5540          | 1564 | 798 | 766 | AK5540   | MK306396 | MK306434 |   |   |
| <i>Tubella arbuscula</i> (Lindl.) Archila                       | Tubella_arbuscula_DB8881          | 1508 | 797 | 711 | DB8881   | MK306397 | MK306435 |   |   |
| <i>Tubella cedralensis</i> (Ames) Archila (1)                   | Tubella_cedralensis_AK6010        | 1564 | 798 | 766 | AK6010   | KY988985 | KY988793 |   |   |
| <i>Tubella cedralensis</i> (Ames) Archila (2)                   | Tubella_cedralensis_FP7049        | 1564 | 798 | 766 | FP7049   | MK306398 | MK306436 |   |   |
| <i>Tubella dirhamphis</i> (Luer) Archila                        | Tubella_dirhamphis_DB11882        | 1564 | 798 | 766 | DB11882  | MK306399 | MK306437 |   |   |
| <i>Tubella dura</i> (Lindl.) Archila                            | Tubella_dura_HBL42                | 1549 | 797 | 752 | HBL_42   | MK306400 | MK306438 |   |   |
| <i>Tubella fruticosa</i> (Luer) Archila                         | Tubella_fruticosa_JBL11580        | 1564 | 798 | 766 | JBL11580 | KY988986 | KY988794 |   |   |
| <i>Tubella notosibirica</i> (T.Hashim.) Archila                 | Tubella_notosibirica_AP225        | 1530 | 797 | 733 | AP225    | MK306401 | MK306439 |   |   |
| <i>Tubella nymphalis</i> (Luer) Archila                         | Tubella_nymphalis_AK5950          | 1557 | 791 | 766 | AK5950   | KY988988 | KY988796 |   |   |
| <i>Tubella parsonsii</i> (Luer & Dod) Archila (1)               | Tubella_parsonsii_AK3302          | 1551 | 797 | 754 | AK3302   | MK306402 | MK306440 |   |   |

|                                                      |                                 |      |     |     |          |          |          |  |  |
|------------------------------------------------------|---------------------------------|------|-----|-----|----------|----------|----------|--|--|
| <i>Tubella parsonsii</i> (Luer & Dod) Archila (2)    | Tubella_parsonsii_AK3305        | 1564 | 798 | 766 | AK3305   | MK306403 | MK306441 |  |  |
| <i>Tubella pusilla</i> (Kunth) Archila               | Tubella_pusilla_DB11841         | 1564 | 798 | 766 | DB11841  | KY988990 | KY988798 |  |  |
| <i>Tubella robledorum</i> (Luer) Archila             | Tubella_robledorum_AK5491       | 1564 | 798 | 766 | AK5491   | MK306404 | MK306442 |  |  |
| <i>Tubella</i> sp.                                   | Tubella_sp_DB9739               | 1564 | 798 | 766 | DB9739   | MK306405 | MK306443 |  |  |
| <i>Tubella todziae</i> (Luer) Archila (1)            | Tubella_todziae_AK3983          | 1532 | 790 | 742 | AK3983   | MK306406 | MK306444 |  |  |
| <i>Tubella todziae</i> (Luer) Archila (2)            | Tubella_todziae_MF540           | 1564 | 798 | 766 | MF540    | MK306407 | MK306445 |  |  |
| <i>Zootrophion gracilentum</i> (Rchb.f.) Luer        | Zootrophion_gracilentum_AK5282  | 1559 | 797 | 762 | AK5282   | KY988995 | MK306446 |  |  |
| <i>Zootrophion hirtzii</i> Luer (1)                  | Zootrophion_hirtzii_AK4848      | 797  | 797 | -   | AK4848   | MK306360 | -        |  |  |
| <i>Zootrophion hirtzii</i> Luer (2)                  | Zootrophion_hirtzii_AK6503      | 797  | 797 | -   | AK6503   | MK306361 | -        |  |  |
| <i>Zootrophion hypodiscus</i> (Rchb.f.) Luer         | Zootrophion_hypodiscus_JBL01480 | 1564 | 798 | 766 | JBL01480 | KY988997 | MK306447 |  |  |
| <i>Zootrophion machagway</i> A.Doucette & J.Portilla | Zootrophion_machagway_AK6505    | 1524 | 797 | 727 | AK6505   | KY988998 | KY988803 |  |  |
| <i>Zootrophion vulturiceps</i> (Luer) Luer           | Zootrophion_vulturiceps_FP3960  | 1549 | 783 | 766 | FP3960   | KY989000 | KY988804 |  |  |
| <i>Zootrophion ximena</i> (Luer & Hirtz) Pfahl       | Zootrophion_ximenaie_AK6502     | 1521 | 797 | 724 | AK6502   | KY989001 | KY988805 |  |  |

**Appendix S2.** Summary of matrix statistics and parsimony information, for the nrITS, *matK* and combined datasets. MT=missing taxa compared to concatenated matrix, %IS = identical sites (percentage) in matrix, %PI = percentage of pairwise identity in matrix, % MC = percentage of missing characters in matrix, % gaps = percentage gap characters of the sequences in matrix, %GC = percentage of GC content in matrix, Model = models selected with AIC according to jModelTest2 v2.1.7, PIC=Parsimony informative characters, CI=consistency index, RI=retention index.

| Matrix   | Species | Terminals | Length (bp) | MT | IS (%) | PI % | % MC | % gaps | %GC  | Model   | PI C | CI    | RI    |
|----------|---------|-----------|-------------|----|--------|------|------|--------|------|---------|------|-------|-------|
| matK     | 111     | 127       | 766         | 13 | 65.8   | 97.4 | 0    | 0.2    | 31.5 | TVM+I+G | 158  | 0.632 | 0.848 |
| ITS      | 122     | 148       | 798         | 1  | 43.4   | 90.6 | 0.3  | 7.9    | 57.6 | GTR+I+G | 311  | 0.422 | 0.85  |
| ITS+matK | 122     | 148       | 1564        | -  | 54.6   | 93.5 | 7.7  | 4.1    | 45.3 | -       | 469  | 0.468 | 0.846 |



**Appendix S3.** Consensus trees inferred from concatenated datasets with BI, ML and MP.

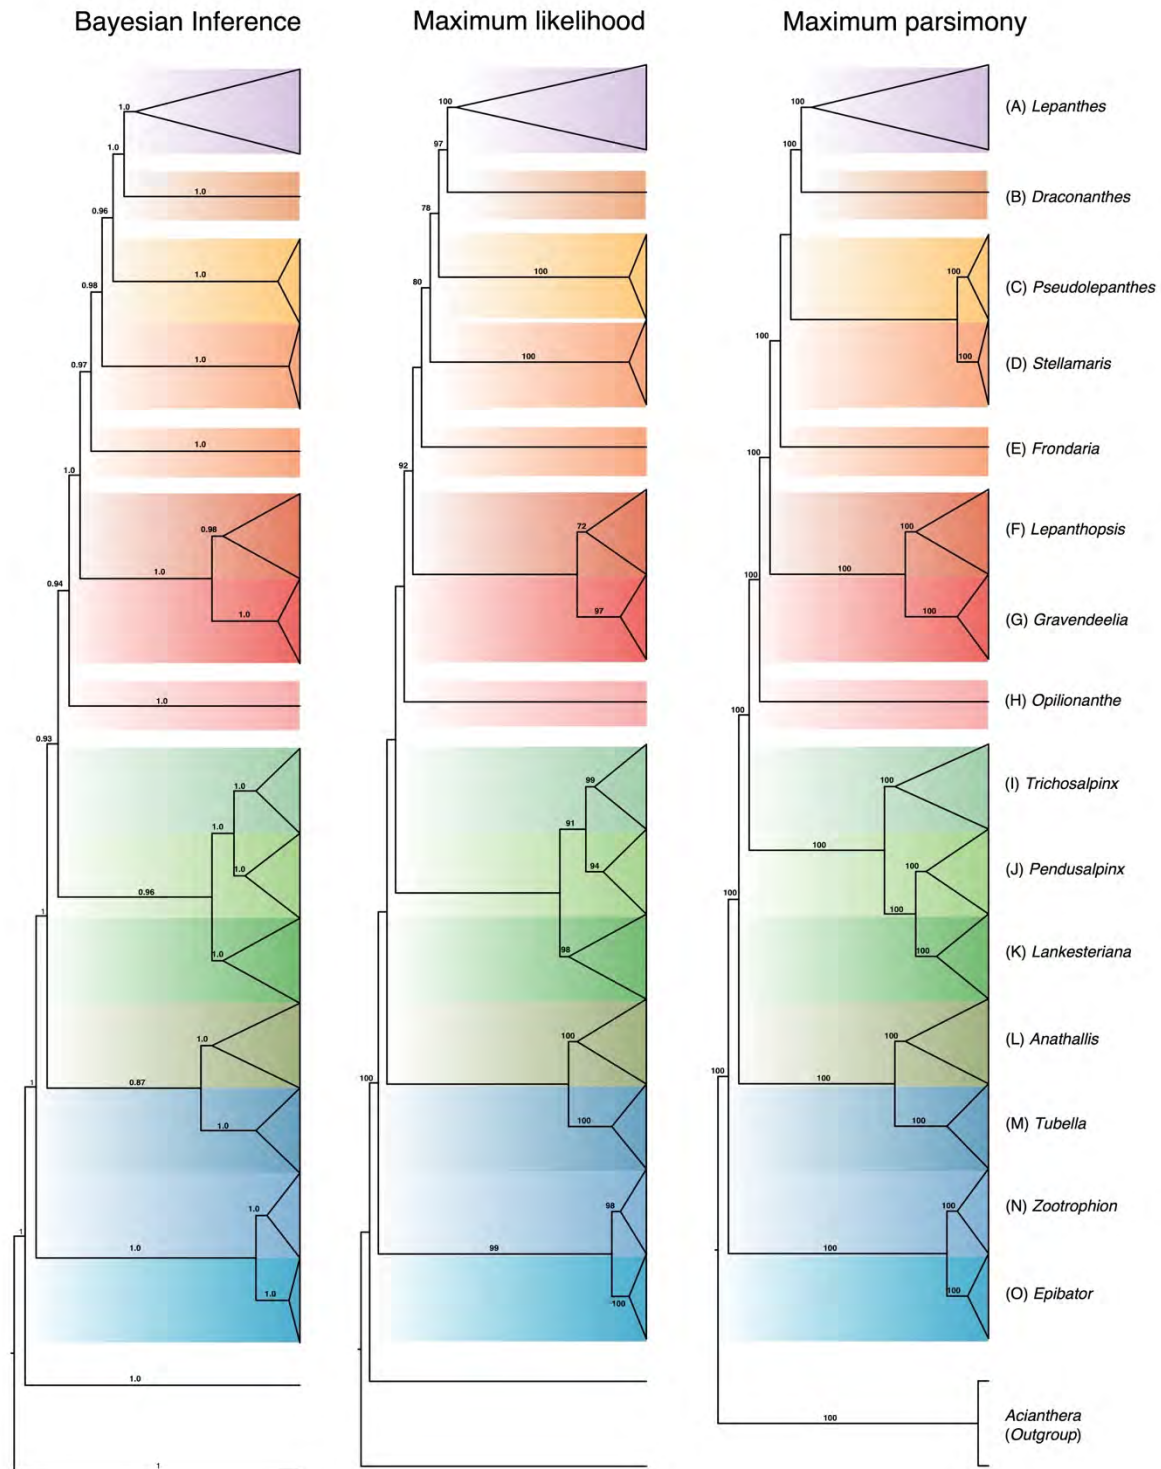



**Appendix S5.** Co-phylogenetic plot of the topologies of the ML consensus trees inferred from A. ITS dataset B. *matK* dataset with function *cophylo* of phytools.

A. ITS

B. matK

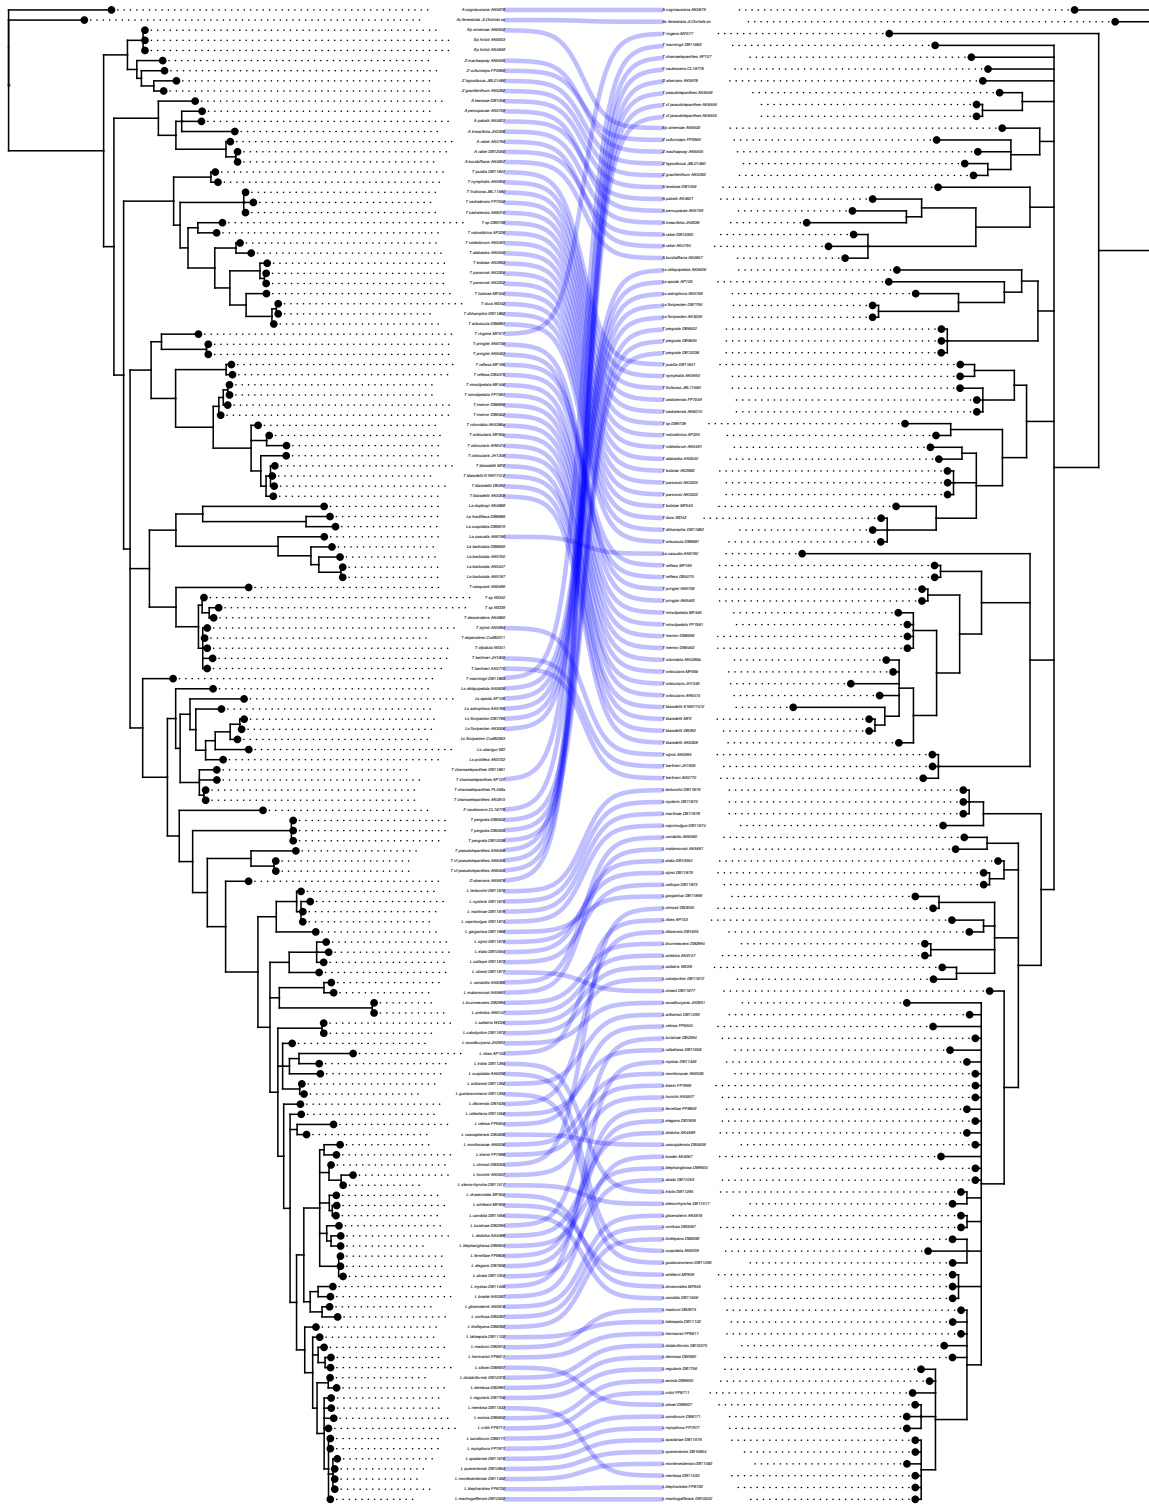

**Appendix S6.** Support values of consensus trees retrieved from the 15 clades recognized as genera belonging to the *Lepanthes* clade and the relationships among them. Values are shown for analyses removing potential outliers identified with PACo and original matrices. Not applicable (N/A) indicates that a clade is represented by only one accession. Not retrieved (NR), indicates clades not obtained in consensus trees.

| Genera                                                            | Clades | Bayesian Inference (PP) |      | Maximum Likelihood (MLB) |      | Maximum Parsimony (MPB) |      |
|-------------------------------------------------------------------|--------|-------------------------|------|--------------------------|------|-------------------------|------|
|                                                                   |        | No PACo                 |      | No PACo                  |      | No PACo                 |      |
|                                                                   |        | PACo                    | PACo | PACo                     | PACo | PACo                    | PACo |
| <i>Lepanthes</i>                                                  | A      | 1.00                    | 1.00 | 100                      | 100  | 100                     | 101  |
| <i>Draconanthes</i>                                               | B      | N/A                     | N/A  | N/A                      | N/A  | N/A                     | N/A  |
| <i>Pseudolepanthes</i>                                            | C      | 1.00                    | 1.00 | 100                      | 100  | 100                     | 100  |
| <i>Stellamaris</i>                                                | D      | 1.00                    | 1.00 | 100                      | 100  | 100                     | 100  |
| <i>Fronitaria</i>                                                 | E      | N/A                     | N/A  | N/A                      | N/A  | N/A                     | N/A  |
| <i>Lepanthopsis</i>                                               | F      | 0.98                    | 1.00 | 72                       | 75   | 100                     | 100  |
| <i>Gravendeelia</i>                                               | G      | 1.00                    | 1.00 | 97                       | 98   | 100                     | 100  |
| <i>Opilionanthe</i>                                               | H      | N/A                     | N/A  | N/A                      | N/A  | N/A                     | N/A  |
| <i>Pendusalpinx</i>                                               | I      | 1.00                    | 1.00 | 99                       | 99   | 100                     | 100  |
| <i>Lankesteriana</i>                                              | J      | 1.00                    | 1.00 | 94                       | 94   | 100                     | 100  |
| <i>Trichosalpinx</i>                                              | K      | 1.00                    | 1.00 | 98                       | 61   | 100                     | 100  |
| <i>Tubella</i>                                                    | L      | 1.00                    | 1.00 | 100                      | 100  | 100                     | 100  |
| <i>Anathallis</i>                                                 | M      | 1.00                    | 1.00 | 100                      | 100  | 100                     | 100  |
| <i>Zootrophion</i>                                                | N      | 1.00                    | 1.00 | 100                      | 100  | 100                     | 100  |
| <b>Relationships among genera</b>                                 |        |                         |      |                          |      |                         |      |
| <i>Lepanthes</i> + <i>Draconanthes</i>                            | 1      | 1.00                    | 1.00 | 100                      | 88   | 100                     | 100  |
| <i>Pseudolepanthes</i> + Clade 1                                  | 2      | 0.96                    | 0.96 | 78                       | 75   | NR                      | NR   |
| <i>Stellamaris</i> + Clade 2                                      | 3      | 0.98                    | 0.99 | 80                       | 77   | NR                      | NR   |
| <i>Fronitaria</i> + Clade 3                                       | 4      | 0.97                    | 0.96 | 56                       | 59   | 100                     | 100  |
| Clade 4 + Clade 6                                                 | 5      | 1.00                    | 1.00 | 92                       | 89   | 100                     | 100  |
| <i>Lepanthopsis</i> + <i>Gravendeelia</i>                         | 6      | 1.00                    | 1.00 | 64                       | 75   | 100                     | 100  |
| <i>Opilionanthe</i> + Clade 5                                     | 7      | 0.94                    | 0.94 | 58                       | 47   | 100                     | NR   |
| Clade 9 + Clade 7                                                 | 8      | 0.93                    | NR   | 32                       | NR   | 100                     | NR   |
| <i>Trichosalpinx</i> + <i>Lankesteriana</i> + <i>Pendusalpinx</i> | 9      | 0.96                    | NR   | 54                       | NR   | 100                     | NR   |
| <i>Lankesteriana</i> + <i>Pendusalpinx</i>                        | 10     | 1.00                    | 1.00 | 91                       | 91   | 100                     | 100  |
| Clade 8 + Clade 12                                                | 11     | 1.00                    | NR   | 54                       | NR   | 100                     | NR   |
| <i>Anathallis</i> + <i>Tubella</i>                                | 12     | 0.87                    | 0.68 | 30                       | 29   | 100                     | NR   |
| Clade 11 + Clade 14                                               | 13     | 1.00                    | 1.00 | 100                      | NR   | 100                     | NR   |
| <i>Zootrophion</i>                                                | 14     | 1.00                    | 1.00 | 99                       | 99   | 100                     | 100  |

**Appendix S7.** Potential conflicting terminals between nuclear and plastid derived phylogenies from BI and ML respectively as inferred by PACo.

**Nuclear tree of ITS – PACo potential outliers**

**Plastid tree of matK – PACo potential outliers**

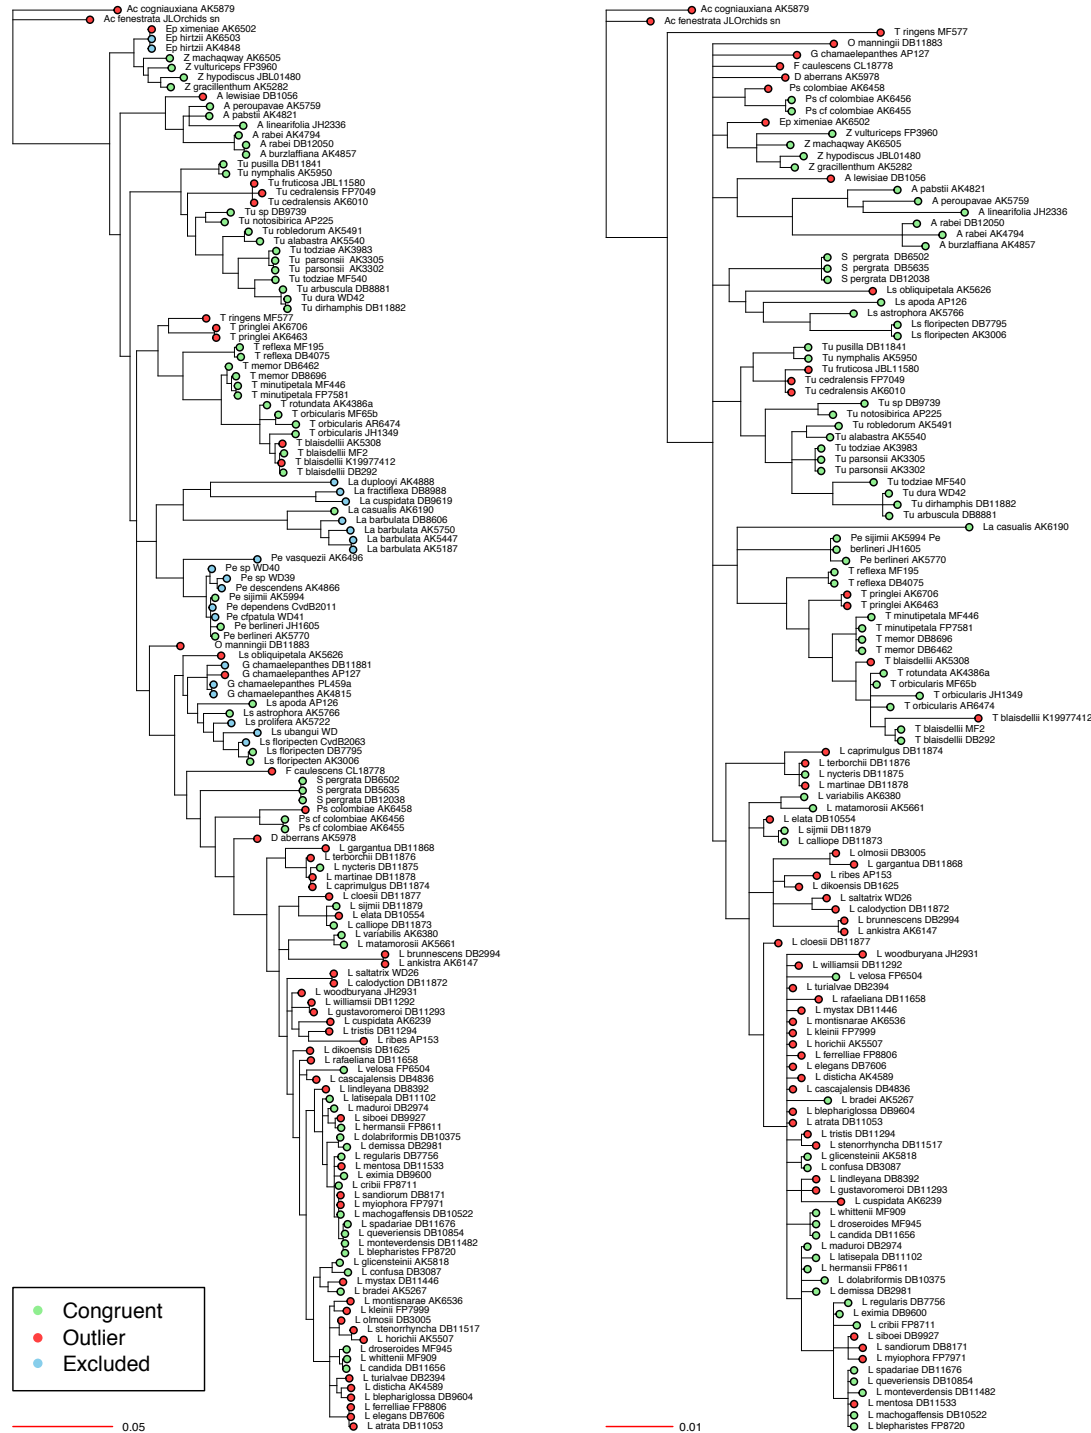

Nuclear tree of ITS – PACo potential outliers

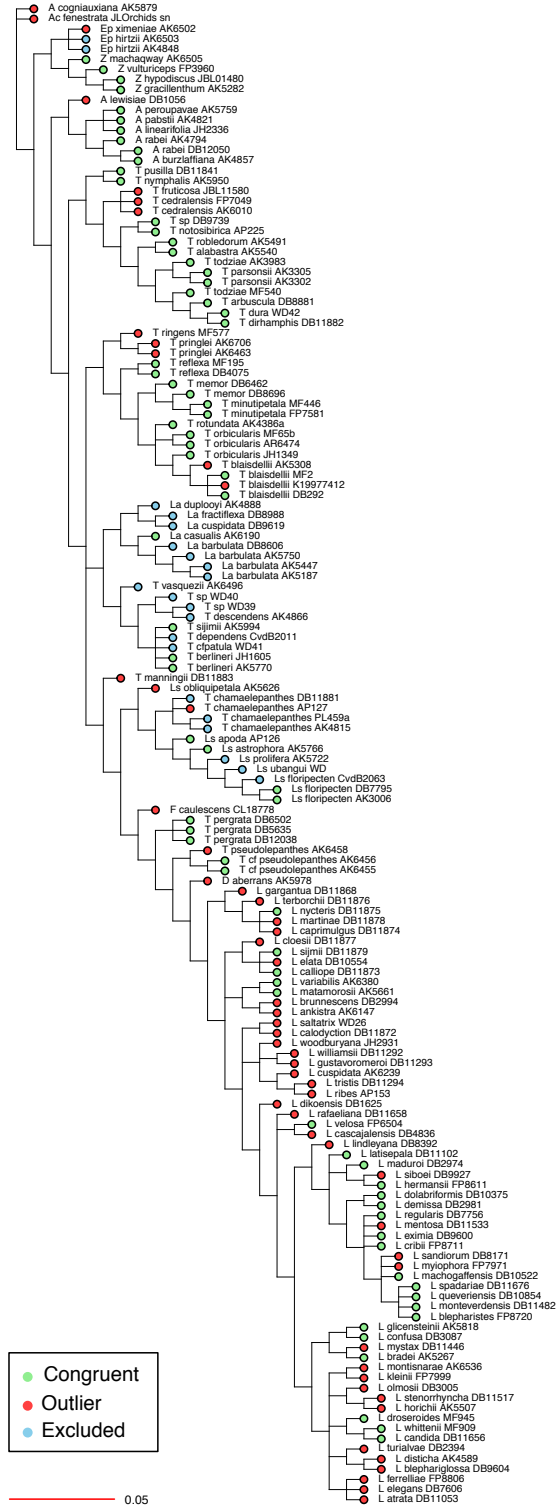

Plastid tree of matK – PACo potential outliers

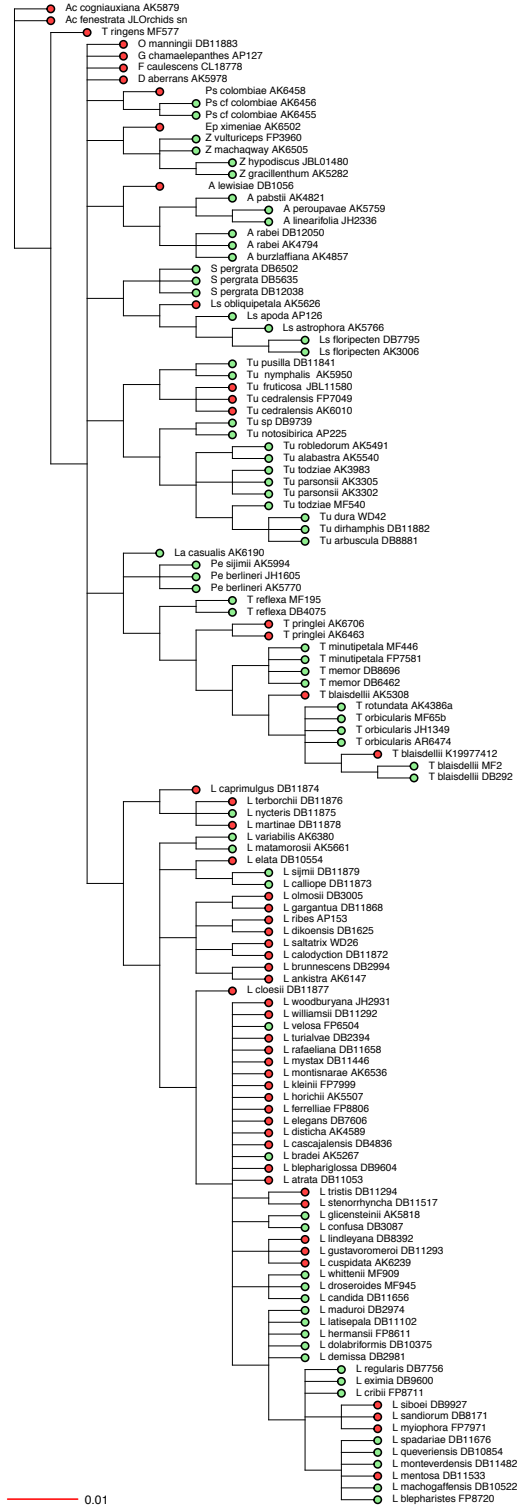

PACo squared residuals – additive trees

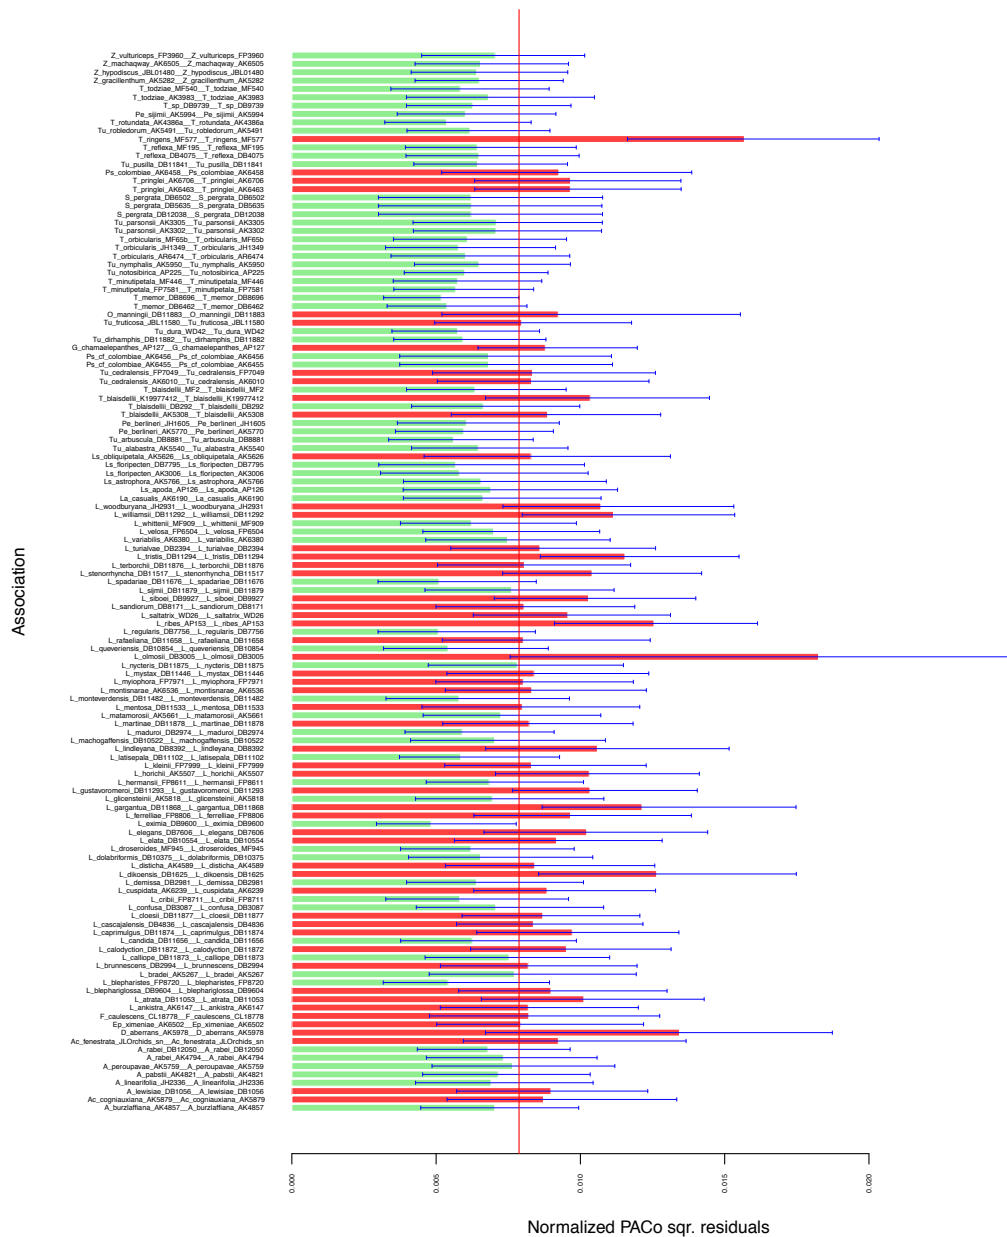





Nuclear tree of ITS – PACo potential outliers

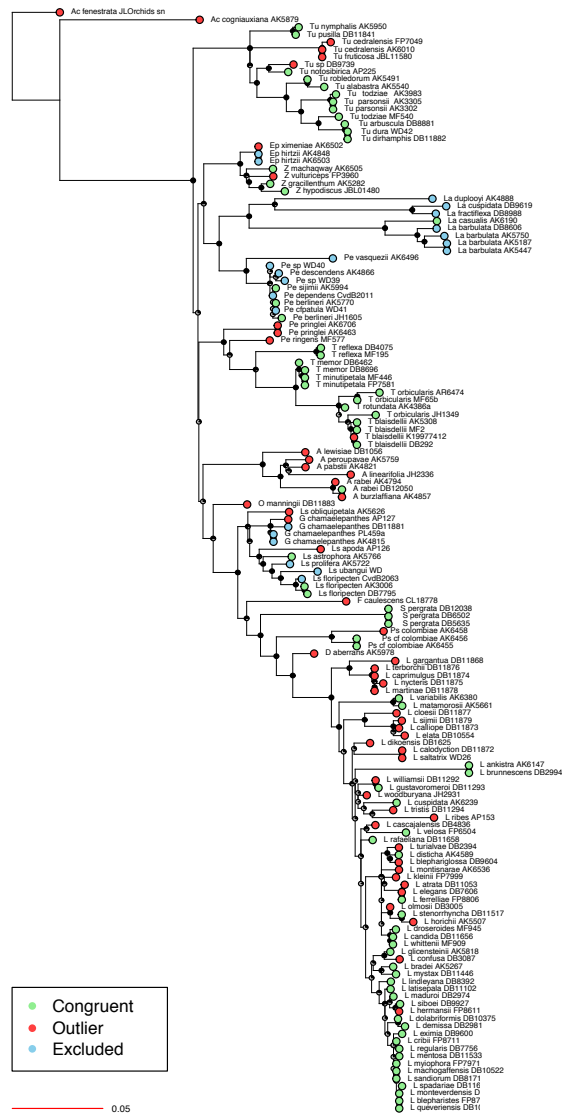

Plastid tree of *matK* – PACo potential outliers

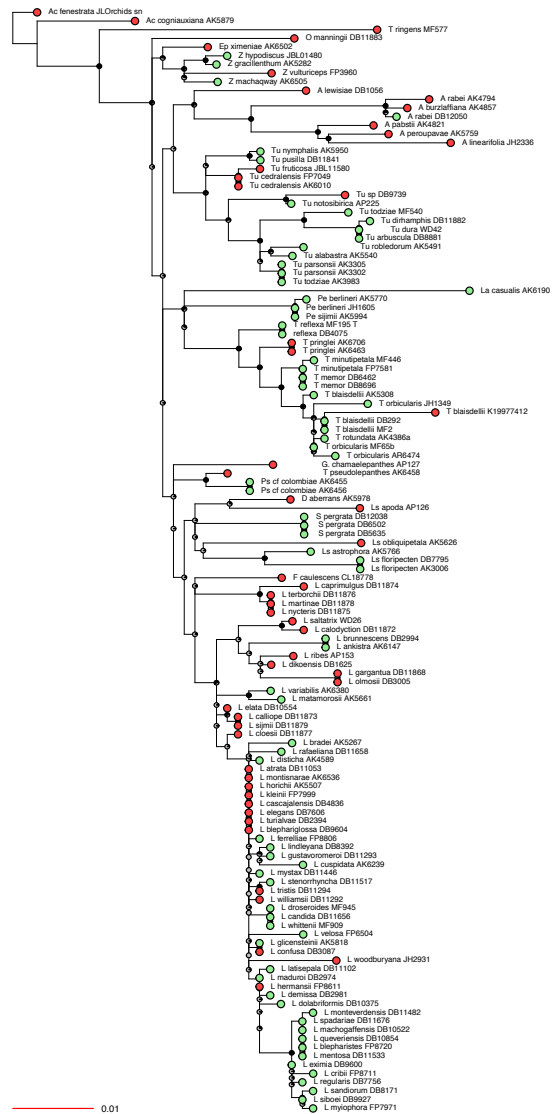

Nuclear tree of ITS – PACo potential outliers

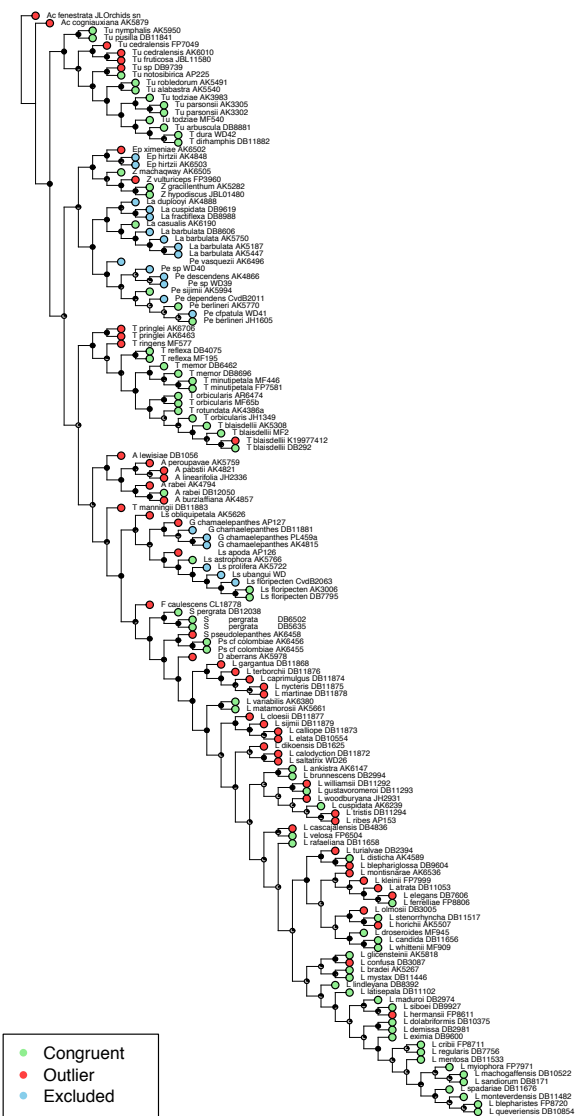

Plastid tree of *matK* – PACo potential outliers

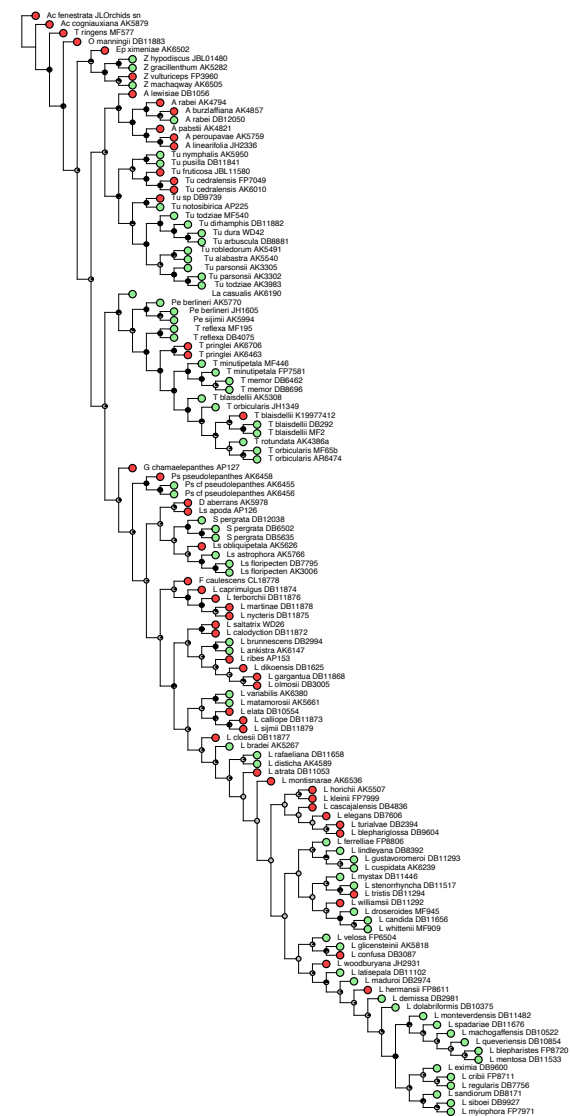

PACo squared residuals – additive trees

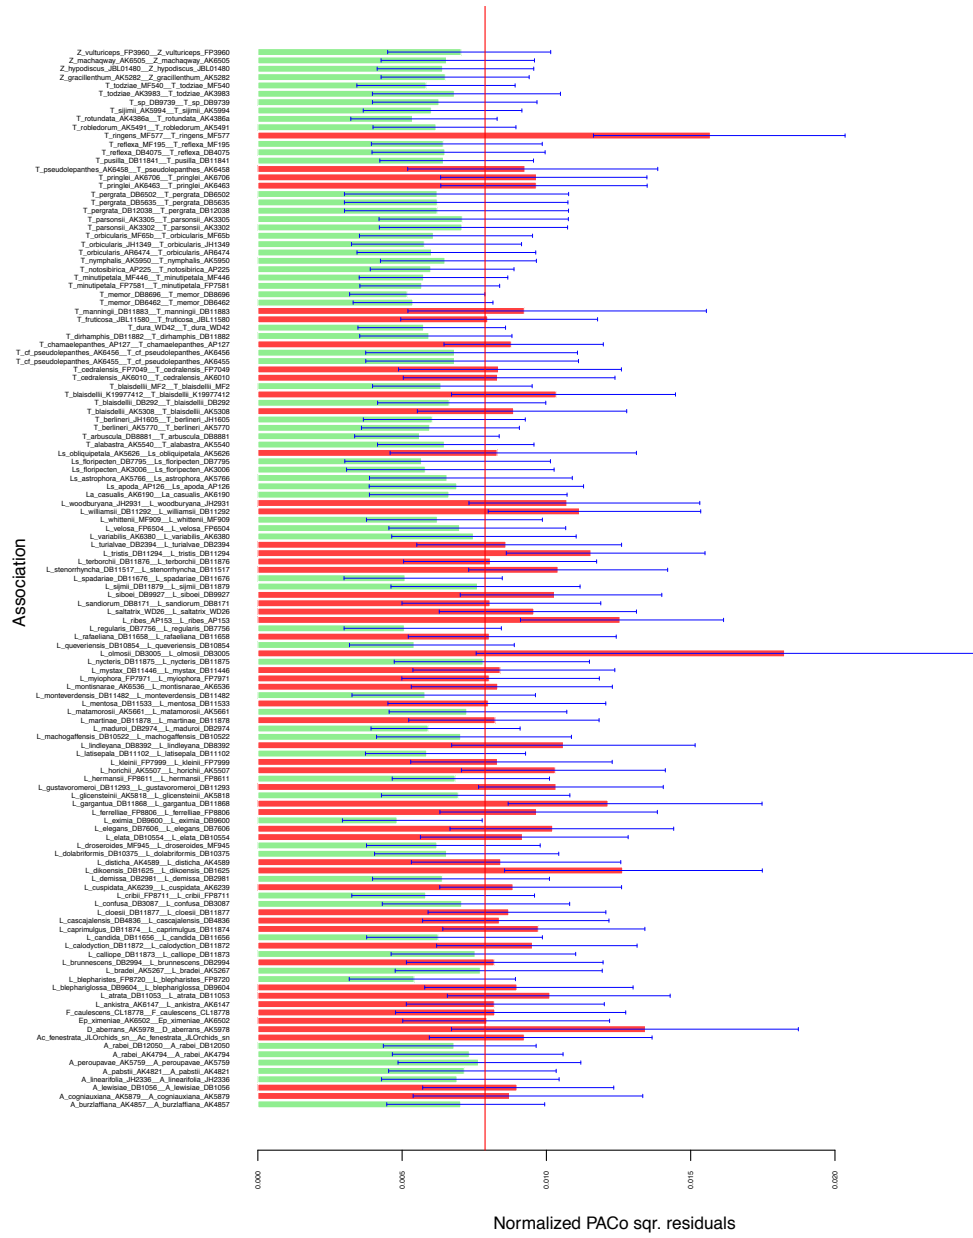



**Appendix S8.** Log-likelihoods from the ER, SYM and ARD models inferred from ultrametric trees using the re-rooting method. \* probability was significantly different <0.01 favoring the more complex model.

| Trait                  | ER     | SYM    | ARD    | ER vs. SYM | ER vs. ARD | SYM vs. ARD | p-val ER vs. SYM | p-val ER vs. ARD | p-val SYM vs. ARD |
|------------------------|--------|--------|--------|------------|------------|-------------|------------------|------------------|-------------------|
| Habit                  | -25.56 | -25.56 | -24.31 | 0.00       | 2.50       | 2.50        | 1.00             | 0.11             | 0.11              |
| Ramicauls              | -16.47 | -16.47 | -16.01 | 0.00       | 0.93       | 0.93        | 1.00             | 0.33             | 0.33              |
| Bracts of ramicauls    | -21.89 | -20.80 | -16.41 | 2.18       | 10.97      | 8.78        | 0.54             | 0.05             | 0.01              |
| Inflorescence          | -22.09 | -22.09 | -18.67 | 0.00       | 6.84       | 6.84        | 1.00             | 0.01             | 0.01              |
| Inflorescence length   | -27.88 | -27.88 | -24.47 | 0.00       | 6.83       | 6.83        | 1.00             | 0.01             | 0.01              |
| Flowers                | -5.47  | -5.47  | -5.43  | 0.00       | 0.08       | 0.08        | 1.00             | 0.78             | 0.78              |
| Dorsal sepal concavity | -24.55 | -24.55 | -24.45 | 0.00       | 0.19       | 0.19        | 1.00             | 0.66             | 0.66              |
| Synsepal               | -20.93 | -20.93 | -19.90 | 0.00       | 2.08       | 2.08        | 1.00             | 0.15             | 0.15              |
| Sepal shape            | -37.48 | -36.75 | -35.60 | 1.46       | 3.77       | 2.31        | 0.69             | 0.58             | 0.31              |
| Petals shape           | -5.34  | -5.34  | -5.22  | 0.00       | 0.23       | 0.23        | 1.00             | 0.63             | 0.63              |
| Lip shape              | -16.42 | -16.42 | -16.11 | 0.00       | 0.63       | 0.63        | 1.00             | 0.43             | 0.43              |
| Lip mobility           | -13.41 | -13.41 | -12.67 | 0.00       | 1.47       | 1.47        | 1.00             | 0.23             | 0.23              |
| Glenion of the lip     | -7.73  | -7.73  | -7.70  | 0.00       | 0.07       | 0.07        | 1.00             | 0.79             | 0.79              |
| Appendix of the lip    | -7.57  | -7.57  | -7.32  | 0.00       | 0.49       | 0.49        | 1.00             | 0.48             | 0.48              |
| Column foot            | -13.58 | -13.58 | -12.90 | 0.00       | 1.36       | 1.36        | 1.00             | 0.24             | 0.24              |
| Sigma shape            | -7.73  | -7.73  | -7.70  | 0.00       | 0.07       | 0.07        | 1.00             | 0.79             | 0.79              |
| Anther position        | -13.58 | -13.58 | -12.90 | 0.00       | 1.36       | 1.36        | 1.00             | 0.24             | 0.24              |
| Pollinarium shape      | -13.41 | -13.41 | -12.67 | 0.00       | 1.47       | 1.47        | 1.00             | 0.23             | 0.23              |

**Appendix S9.** Log-likelihoods from the ER, SYM and ARD models inferred from ultrametric trees using the ACE function of APE. \* probability was significantly different <0.01 favoring the more complex model.

| Trait                  | ER     | SYM    | ARD    | ER vs. SYM | ER vs. ARD | SYM vs. ARD | p-val ER vs. SYM | p-val ER vs. ARD | p-val SYM vs. ARD |
|------------------------|--------|--------|--------|------------|------------|-------------|------------------|------------------|-------------------|
| Habit                  | -24.87 | -24.87 | -23.62 | 0.00       | 2.50       | 2.50        | 1.00             | 0.11             | 0.11              |
| Ramicauls              | -15.78 | -15.78 | -19.10 | 0.00       | 6.63       | 6.63        | 1.00             | 0.01             | 0.01              |
| Bracts of ramicauls    | -20.79 | -19.70 | -15.31 | 2.18       | 10.97      | 8.78        | 0.54             | 0.05             | 0.01              |
| Inflorescence          | -21.40 | -21.40 | -17.98 | 0.00       | 6.84       | 6.84        | 1.00             | 0.01             | 0.01              |
| Inflorescence length   | -27.19 | -27.19 | -23.77 | 0.00       | 6.83       | 6.83        | 1.00             | 0.01             | 0.01              |
| Flowers                | -4.78  | -4.78  | -4.74  | 0.00       | 0.08       | 0.08        | 1.00             | 0.78             | 0.78              |
| Dorsal sepal concavity | -23.85 | -23.85 | -27.44 | 0.00       | 7.18       | 7.18        | 1.00             | 0.01             | 0.01              |
| Synsepal               | -20.24 | -20.24 | -17.39 | 0.00       | 5.70       | 5.70        | 1.00             | 0.02             | 0.02              |
| Sepal shape            | -36.38 | -35.65 | -32.47 | 1.46       | 7.82       | 6.36        | 0.69             | 0.17             | 0.04              |
| Petals shape           | -4.65  | -4.65  | -4.53  | 0.00       | 0.23       | 0.23        | 1.00             | 0.63             | 0.63              |
| Lip shape              | -15.73 | -15.73 | -15.41 | 0.00       | 0.63       | 0.63        | 1.00             | 0.43             | 0.43              |
| Lip mobility           | -12.71 | -12.71 | -11.98 | 0.00       | 1.47       | 1.47        | 1.00             | 0.23             | 0.23              |
| Glenion of the lip     | -7.04  | -7.04  | -7.00  | 0.00       | 0.07       | 0.07        | 1.00             | 0.79             | 0.79              |
| Appendix of the lip    | -6.88  | -6.88  | -6.63  | 0.00       | 0.49       | 0.49        | 1.00             | 0.48             | 0.48              |
| Column foot            | -12.89 | -12.89 | -12.20 | 0.00       | 1.36       | 1.36        | 1.00             | 0.24             | 0.24              |
| Sigma shape            | -7.04  | -7.04  | -7.00  | 0.00       | 0.07       | 0.07        | 1.00             | 0.79             | 0.79              |
| Anther position        | -12.89 | -12.89 | -12.20 | 0.00       | 1.36       | 1.36        | 1.00             | 0.24             | 0.24              |
| Pollinarium shape      | -12.71 | -12.71 | -11.98 | 0.00       | 1.47       | 1.47        | 1.00             | 0.23             | 0.23              |

**Appendix S10.** Log-likelihood ratio test estimated from the ARD, ER and SYM models inferred from phylograms using re-rooting method. \* probability was significantly different <0.01 favoring the more complex model.

| Trait                  | ER     | SYM    | ARD    | ER vs. SYM | ERvsARD | SYMvsARD | p-val SYM vs. ARD | p-val ER vs. SYM | p-val ER vs. ARD |
|------------------------|--------|--------|--------|------------|---------|----------|-------------------|------------------|------------------|
| Habit                  | -28.48 | -28.48 | -23.50 | 0.00       | 9.96    | 9.96     | 0.02              | 1.00             | 0.08             |
| Ramicauls              | -18.95 | -18.95 | -18.60 | 0.00       | 0.70    | 0.70     | 0.87              | 1.00             | 0.98             |
| Bracts of ramicauls    | -22.12 | -21.11 | -19.60 | 2.01       | 5.03    | 3.01     | 0.39              | 0.37             | 0.41             |
| Inflorescence          | -23.36 | -23.36 | -18.82 | 0.00       | 9.07    | 9.07     | 0.03              | 1.00             | 0.11             |
| Inflorescence length   | -29.33 | -29.33 | -27.13 | 0.00       | 4.39    | 4.39     | 0.22              | 1.00             | 0.49             |
| Flowers                | -07.22 | -07.22 | -07.21 | 0.00       | 0.03    | 0.03     | 1.00              | 1.00             | 1.00             |
| Dorsal sepal concavity | -22.99 | -22.99 | -22.67 | 0.00       | 0.64    | 0.64     | 0.89              | 1.00             | 0.99             |
| Synsepal               | -22.78 | -22.78 | -19.93 | 0.00       | 5.70    | 5.70     | 0.13              | 1.00             | 0.34             |
| Sepal shape            | -42.36 | -41.62 | -40.86 | 1.48       | 3.01    | 1.53     | 0.68              | 0.48             | 0.70             |
| Petals shape           | -06.26 | -06.26 | -05.51 | 0.00       | 1.50    | 1.50     | 0.68              | 1.00             | 0.91             |
| Lip shape              | -07.63 | -07.63 | -07.30 | 0.00       | 0.64    | 0.64     | 0.89              | 1.00             | 0.99             |
| Lip mobility           | -13.72 | -13.72 | -12.83 | 0.00       | 1.77    | 1.77     | 0.62              | 1.00             | 0.88             |
| Glenion of the lip     | -08.13 | -8.13  | -08.07 | 0.00       | 0.12    | 0.12     | 0.99              | 1.00             | 1.00             |
| Appendix of the lip    | -07.11 | -07.11 | -06.80 | 0.00       | 0.61    | 0.61     | 0.89              | 1.00             | 0.99             |
| Column foot            | -13.63 | -13.63 | -12.79 | 0.00       | 1.67    | 1.67     | 0.64              | 1.00             | 0.89             |
| Sigma shape            | -08.13 | -08.13 | -08.07 | 0.00       | 0.12    | 0.12     | 0.99              | 1.00             | 1.00             |
| Anther position        | -13.63 | -13.63 | -12.79 | 0.00       | 1.67    | 1.67     | 0.64              | 1.00             | 0.89             |
| Pollinarium shape      | -13.72 | -13.72 | -12.83 | 0.00       | 1.77    | 1.77     | 0.62              | 1.00             | 0.88             |



**Appendix S11.** Bayes factors (BF) of support tree model testing for dating analysis. MLE= Marginal likelihood estimation, SS=stepping stone sampler, CV=coefficient of variation, Y=Yule, BD=Birth Death-Process, BDIS=Birth-Death-Incomplete Sampling.

| <b>Speciation model</b> | <b>MLE (SS)</b> | <b>CV</b> | <b>Y</b>     | <b>BD</b> | <b>BDIS</b> |
|-------------------------|-----------------|-----------|--------------|-----------|-------------|
| Y                       | -13860.10       | 0.53      | 0            | -         | -           |
| BD                      | -13850.61       | 0.52      | <b>18.97</b> | 0         | -           |
| BDIS                    | -13852.43       | 0.52      | 15.33        | -3.65     | 0           |

**Appendix S12.** Summary results of the top five best fitting models from the Reversible-Jump MCMC approach with BayesTraitsV3 showing rate classes, frequency of model strings, proportion of zero bin (Z%), posterior distributions of rate classes and standard deviations.

Habit: (0) cespitose ; (1) repent

| <b>Model</b>                         | <b>q01</b> | <b>q10</b> | <b>Frequency</b> | <b>Proportion</b> |
|--------------------------------------|------------|------------|------------------|-------------------|
| <b>1</b>                             | 0          | 0          | 24861            | 0.80              |
| <b>2</b>                             | Z          | 0          | 4983             | 0.00              |
| <b>3</b>                             | 0          | Z          | 74               | 0.20              |
| <b>4</b>                             | 0          | 1          | 73               | 0.00              |
| <b>5</b>                             | 1          | 0          | 9                | 0.00              |
| <b>Frequency (Z)</b>                 | 9          | 4983       |                  |                   |
| <b>Proportion zero bin (Z%)</b>      | 0.03       | 16.61      |                  |                   |
| <b>Posterior distribution (mean)</b> | 0.015      | 0.012      |                  |                   |
| <b>Standard deviation</b>            | 0.006      | 0.008      |                  |                   |

Ramicauls: (0) non-prolific ; (1) prolific

| <b>Model</b>         | <b>q01</b> | <b>q10</b> | <b>Frequency</b> | <b>Proportion</b> |
|----------------------|------------|------------|------------------|-------------------|
| <b>1</b>             | 0          | 0          | 21718            | 0.72              |
| <b>2</b>             | 0          | Z          | 8201             | 0.27              |
| <b>3</b>             | 0          | 1          | 44               | 0.00              |
| <b>4</b>             | 1          | 0          | 36               | 0.00              |
| <b>5</b>             | Z          | 0          | 1                | 0.00              |
| <b>Frequency (Z)</b> | 1          | 8201       |                  |                   |

|                                      |       |       |
|--------------------------------------|-------|-------|
| <b>Proportion zero bin (Z%)</b>      | 0     | 27.34 |
| <b>Posterior distribution (mean)</b> | 0.009 | 0.007 |
| <b>Standard deviation</b>            | 0.005 | 0.006 |

---

Bracts of ramicauls: (0) unornamented ; (1) ornamented; (2) foliaceous

| <b>Model</b>                         | <b>q01</b> | <b>q02</b> | <b>q10</b> | <b>q12</b> | <b>q20</b> | <b>q21</b> | <b>Frequency</b> | <b>Proportion</b> |
|--------------------------------------|------------|------------|------------|------------|------------|------------|------------------|-------------------|
| <b>1</b>                             | 0          | Z          | Z          | 0          | Z          | 0          | 3801             | 0.13              |
| <b>2</b>                             | 0          | Z          | Z          | 0          | 0          | 0          | 3613             | 0.12              |
| <b>3</b>                             | 0          | Z          | 0          | 0          | Z          | 0          | 1936             | 0.06              |
| <b>4</b>                             | 0          | Z          | 0          | 0          | 0          | 0          | 1870             | 0.06              |
| <b>5</b>                             | 0          | Z          | 0          | 0          | Z          | Z          | 1870             | 0.06              |
| <b>Frequency (Z)</b>                 | 5898       | 17122      | 15117      | 5034       | 13805      | 8161       |                  |                   |
| <b>Proportion zero bin (Z%)</b>      | 19.66      | 57.07      | 50.39      | 16.78      | 46.02      | 27.2       |                  |                   |
| <b>Posterior distribution (mean)</b> | 0.011      | 0.009      | 0.005      | 0.010      | 0.066      | 0.133      |                  |                   |
| <b>Standard deviation</b>            | 0.012      | 0.038      | 0.006      | 0.019      | 0.832      | 1.313      |                  |                   |

---

Inflorescence: (0) simultaneous ; (1) successive

| <b>Model</b>                         | <b>q01</b> | <b>q10</b> | <b>Frequency</b> | <b>Proportion</b> |
|--------------------------------------|------------|------------|------------------|-------------------|
| <b>1</b>                             | 0          | Z          | 24225            | 0.81              |
| <b>2</b>                             | 0          | 0          | 5270             | 0.18              |
| <b>3</b>                             | Z          | 0          | 365              | 0.01              |
| <b>4</b>                             | 1          | 0          | 72               | 0.00              |
| <b>5</b>                             | 0          | 1          | 68               | 0.00              |
| <b>Frequency (Z)</b>                 | 365        | 24225      |                  |                   |
| <b>Proportion zero bin (Z%)</b>      | 1.22       | 80.75      |                  |                   |
| <b>Posterior distribution (mean)</b> | 0.020      | 0.003      |                  |                   |
| <b>Standard deviation</b>            | 0.010      | 0.007      |                  |                   |

---

Inflorescence length: (0) shorter than leaves ; (1) longer than leaves

| <b>Model</b>                         | <b>q01</b> | <b>q10</b> | <b>Frequency</b> | <b>Proportion</b> |
|--------------------------------------|------------|------------|------------------|-------------------|
| <b>1</b>                             | Z          | 0          | 25007            | 0.83              |
| <b>2</b>                             | 0          | 0          | 4763             | 0.16              |
| <b>3</b>                             | 1          | 0          | 116              | 0.00              |
| <b>4</b>                             | 0          | 1          | 102              | 0.00              |
| <b>5</b>                             | 0          | Z          | 12               | 0.00              |
| <b>Frequency (Z)</b>                 | 25007      | 12         |                  |                   |
| <b>Proportion zero bin (Z%)</b>      | 83.36      | 0.04       |                  |                   |
| <b>Posterior distribution (mean)</b> | 0.004      | 0.035      |                  |                   |
| <b>Standard deviation</b>            | 0.010      | 0.013      |                  |                   |

---

Flowers: (0) fully opening; (1) bud-like

| Model                                | q01   | q10   | Frequency | Proportion |
|--------------------------------------|-------|-------|-----------|------------|
| 1                                    | 0     | 0     | 23904     | 0.80       |
| 2                                    | 0     | Z     | 6027      | 0.20       |
| 3                                    | Z     | 0     | 34        | 0.00       |
| 4                                    | 0     | 1     | 23        | 0.00       |
| 5                                    | 1     | 0     | 12        | 0.00       |
| <b>Frequency (Z)</b>                 | 34    | 6027  |           |            |
| <b>Proportion zero bin (Z%)</b>      | 0.11  | 20.09 |           |            |
| <b>Posterior distribution (mean)</b> | 0.002 | 0.002 |           |            |
| <b>Standard deviation</b>            | 0.002 | 0.002 |           |            |

Dorsal sepal concavity: (0) concave; (1) flattened

| Model                                | q01   | q10   | Frequency | Proportion |
|--------------------------------------|-------|-------|-----------|------------|
| 1                                    | 0     | 0     | 23944     | 0.80       |
| 2                                    | 0     | Z     | 6025      | 0.20       |
| 3                                    | 1     | 0     | 18        | 0.00       |
| 4                                    | 0     | 1     | 13        | 0.00       |
| <b>Frequency (Z)</b>                 | 11    | 29    |           |            |
| <b>Proportion zero bin (Z%)</b>      | 0.04  | 0.1   |           |            |
| <b>Posterior distribution (mean)</b> | 0.013 | 0.013 |           |            |
| <b>Standard deviation</b>            | 0.006 | 0.006 |           |            |

Synsepal: (0) absent ; (1) present

| Model                                | q01   | q10   | Frequency | Proportion |
|--------------------------------------|-------|-------|-----------|------------|
| 1                                    | 0     | 0     | 13682     | 0.46       |
| 2                                    | 0     | Z     | 13583     | 0.45       |
| 3                                    | Z     | 0     | 2558      | 0.09       |
| 4                                    | 1     | 0     | 101       | 0.00       |
| 5                                    | 0     | 1     | 76        | 0.00       |
| <b>Frequency (Z)</b>                 | 2558  | 13583 |           |            |
| <b>Proportion zero bin (Z%)</b>      | 8.53  | 45.28 |           |            |
| <b>Posterior distribution (mean)</b> | 0.018 | 0.007 |           |            |
| <b>Standard deviation</b>            | 0.014 | 0.008 |           |            |

Sepals shape: (0) unornamented ; (1) ornamented; (2) foliaceous

| Model | q01 | q02 | q10 | q12 | q20 | q21 | Frequency | Proportion |
|-------|-----|-----|-----|-----|-----|-----|-----------|------------|
| 1     | 0   | 0   | 0   | Z   | Z   | Z   | 4720      | 0.16       |
| 2     | 0   | 0   | Z   | 0   | Z   | Z   | 2917      | 0.10       |
| 3     | 0   | Z   | Z   | Z   | 0   | 0   | 2280      | 0.08       |

|                                      |       |       |       |       |       |       |      |      |
|--------------------------------------|-------|-------|-------|-------|-------|-------|------|------|
| <b>4</b>                             | Z     | 0     | Z     | Z     | 0     | 0     | 2054 | 0.07 |
| <b>5</b>                             | Z     | Z     | 0     | Z     | 0     | 0     | 1711 | 0.06 |
| <b>Frequency (Z)</b>                 | 9442  | 10113 | 15152 | 17531 | 9929  | 13132 |      |      |
| <b>Proportion zero bin (Z%)</b>      | 31.47 | 33.71 | 50.51 | 58.44 | 33.1  | 43.77 |      |      |
| <b>Posterior distribution (mean)</b> | 0.027 | 0.030 | 0.022 | 0.014 | 0.013 | 0.010 |      |      |
| <b>Standard deviation</b>            | 0.030 | 0.034 | 0.034 | 0.022 | 0.012 | 0.010 |      |      |

Petals shape: (0) subsimilar ; (1) dissimilar

| <b>Model</b>                         | <b>q01</b> | <b>q10</b> | <b>Frequency</b> | <b>Proportion</b> |
|--------------------------------------|------------|------------|------------------|-------------------|
| <b>1</b>                             | 0          | 0          | 23944            | 0.80              |
| <b>2</b>                             | 0          | Z          | 6025             | 0.20              |
| <b>3</b>                             | 1          | 0          | 18               | 0.00              |
| <b>4</b>                             | 0          | 1          | 13               | 0.00              |
| <b>Frequency (Z)</b>                 | 0          | 6025       |                  |                   |
| <b>Proportion zero bin (Z%)</b>      | 0          | 20.08      |                  |                   |
| <b>Posterior distribution (mean)</b> | 0.018      | 0.007      |                  |                   |
| <b>Standard deviation</b>            | 0.014      | 0.008      |                  |                   |

Lip shape: (0) laminar ; (1) bilobed

| <b>Model</b>                         | <b>q01</b> | <b>q10</b> | <b>Frequency</b> | <b>Proportion</b> |
|--------------------------------------|------------|------------|------------------|-------------------|
| <b>1</b>                             | 0          | 0          | 23944            | 0.80              |
| <b>2</b>                             | 0          | Z          | 6025             | 0.20              |
| <b>3</b>                             | 1          | 0          | 18               | 0.00              |
| <b>4</b>                             | 0          | 1          | 13               | 0.00              |
| <b>Frequency (Z)</b>                 | 0          | 7033       |                  |                   |
| <b>Proportion zero bin (Z%)</b>      | 0          | 23.44      |                  |                   |
| <b>Posterior distribution (mean)</b> | 0.002      | 0.002      |                  |                   |
| <b>Standard deviation</b>            | 0.002      | 0.002      |                  |                   |

Lip mobility: (0) motile ; (1) sessile

| <b>Model</b>                         | <b>q01</b> | <b>q10</b> | <b>Frequency</b> | <b>Proportion</b> |
|--------------------------------------|------------|------------|------------------|-------------------|
| <b>1</b>                             | 0          | 0          | 20653            | 20653.00          |
| <b>2</b>                             | 0          | Z          | 9285             | 9285.00           |
| <b>3</b>                             | 0          | 1          | 34               | 34.00             |
| <b>4</b>                             | 1          | 0          | 28               | 28.00             |
| <b>Frequency (Z)</b>                 | 0          | 9185       |                  |                   |
| <b>Proportion zero bin (Z%)</b>      | 0          | 30.95      |                  |                   |
| <b>Posterior distribution (mean)</b> | 0.005      | 0.003      |                  |                   |
| <b>Standard deviation</b>            | 0.003      | 0.003      |                  |                   |

Glenion of the lip: (0) absent ; (1) present

| <b>Model</b>                         | <b>q01</b> | <b>q10</b> | <b>Frequency</b> | <b>Proportion</b> |
|--------------------------------------|------------|------------|------------------|-------------------|
| 1                                    | 0          | 0          | 23833            | 0.79              |
| 2                                    | 0          | Z          | 6141             | 0.20              |
| 3                                    | 1          | 0          | 15               | 0.00              |
| 4                                    | 0          | 1          | 11               | 0.00              |
| <b>Frequency (Z)</b>                 | 0          | 6141       |                  |                   |
| <b>Proportion zero bin (Z%)</b>      | 0          | 20.47      |                  |                   |
| <b>Posterior distribution (mean)</b> | 0.002      | 0.002      |                  |                   |
| <b>Standard deviation</b>            | 0.002      | 0.002      |                  |                   |

Appendix of the lip: (0) absent ; (1) present

| <b>Model</b>                         | <b>q01</b> | <b>q10</b> | <b>Frequency</b> | <b>Proportion</b> |
|--------------------------------------|------------|------------|------------------|-------------------|
| 1                                    | 0          | 0          | 20751            | 0.69              |
| 2                                    | 0          | Z          | 9185             | 0.00              |
| 3                                    | 1          | 0          | 34               | 0.00              |
| 4                                    | 0          | 1          | 30               | 0.31              |
| <b>Frequency (Z)</b>                 | 0          | 7820       |                  |                   |
| <b>Proportion zero bin (Z%)</b>      | 0.11       | 20.09      |                  |                   |
| <b>Posterior distribution (mean)</b> | 0.004      | 0.003      |                  |                   |
| <b>Standard deviation</b>            | 0.003      | 0.003      |                  |                   |

Column foot: (0) absent ; (1) present

| <b>Model</b>                         | <b>q01</b> | <b>q10</b> | <b>Frequency</b> | <b>Proportion</b> |
|--------------------------------------|------------|------------|------------------|-------------------|
| 1                                    | 0          | 0          | 20688            | 0.69              |
| 2                                    | Z          | 0          | 9249             | 0.31              |
| 3                                    | 1          | 0          | 36               | 0.00              |
| 4                                    | 0          | 1          | 27               | 0.00              |
| <b>Frequency (Z)</b>                 | 9249       | 0          |                  |                   |
| <b>Proportion zero bin (Z%)</b>      | 30.83      | 0          |                  |                   |
| <b>Posterior distribution (mean)</b> | 0.003      | 0.005      |                  |                   |
| <b>Standard deviation</b>            | 0.003      | 0.003      |                  |                   |

Sigma shape: (0) entire ; (1) bilobed

| <b>Model</b>         | <b>q01</b> | <b>q10</b> | <b>Frequency</b> | <b>Proportion</b> |
|----------------------|------------|------------|------------------|-------------------|
| 1                    | 0          | 0          | 23772            | 0.79              |
| 2                    | 0          | Z          | 6199             | 0.21              |
| 3                    | 0          | 1          | 16               | 0.00              |
| 4                    | 1          | 0          | 13               | 0.00              |
| <b>Frequency (Z)</b> | 0          | 9185       |                  |                   |

|                                      |       |       |
|--------------------------------------|-------|-------|
| <b>Proportion zero bin (Z%)</b>      | 0     | 20.66 |
| <b>Posterior distribution (mean)</b> | 0.002 | 0.002 |
| <b>Standard deviation</b>            | 0.002 | 0.002 |

---

Anther position: (0) ventral ; (1) dorsal

| <b>Model</b>                         | <b>q01</b> | <b>q10</b> | <b>Frequency (model)</b> | <b>Proportion</b> |
|--------------------------------------|------------|------------|--------------------------|-------------------|
| <b>1</b>                             | 0          | 0          | 20751                    | 0.69              |
| <b>2</b>                             | 0          | Z          | 9185                     | 0.31              |
| <b>3</b>                             | 1          | 0          | 34                       | 0.00              |
| <b>4</b>                             | 0          | 1          | 30                       | 0.00              |
| <b>Frequency (Z)</b>                 | 0          | 9185       |                          |                   |
| <b>Proportion zero bin (Z%)</b>      | 0.000      | 30.620     |                          |                   |
| <b>Posterior distribution (mean)</b> | 0.005      | 0.003      |                          |                   |
| <b>Standard deviation</b>            | 0.003      | 0.003      |                          |                   |

---

Pollinarium: (0) with caudicles; (1) with caudicles+viscidium

| <b>Model</b>                         | <b>q01</b> | <b>q10</b> | <b>Frequency</b> | <b>Proportion</b> |
|--------------------------------------|------------|------------|------------------|-------------------|
| <b>1</b>                             | 0          | 0          | 20541            | 20541.00          |
| <b>2</b>                             | 0          | Z          | 9404             | 9404.00           |
| <b>3</b>                             | 1          | 0          | 28               | 28.00             |
| <b>4</b>                             | 0          | 1          | 27               | 27.00             |
| <b>Frequency (Z)</b>                 | 0          | 9185       |                  |                   |
| <b>Proportion zero bin (Z%)</b>      | 0          | 31.35      |                  |                   |
| <b>Posterior distribution (mean)</b> | 0.005      | 0.003      |                  |                   |
| <b>Standard deviation</b>            | 0.003      | 0.003      |                  |                   |

---

**Appendix S13.** Posterior distributions of the rate coefficients based on Reversible-Jump approach of BayesTraitsV3.

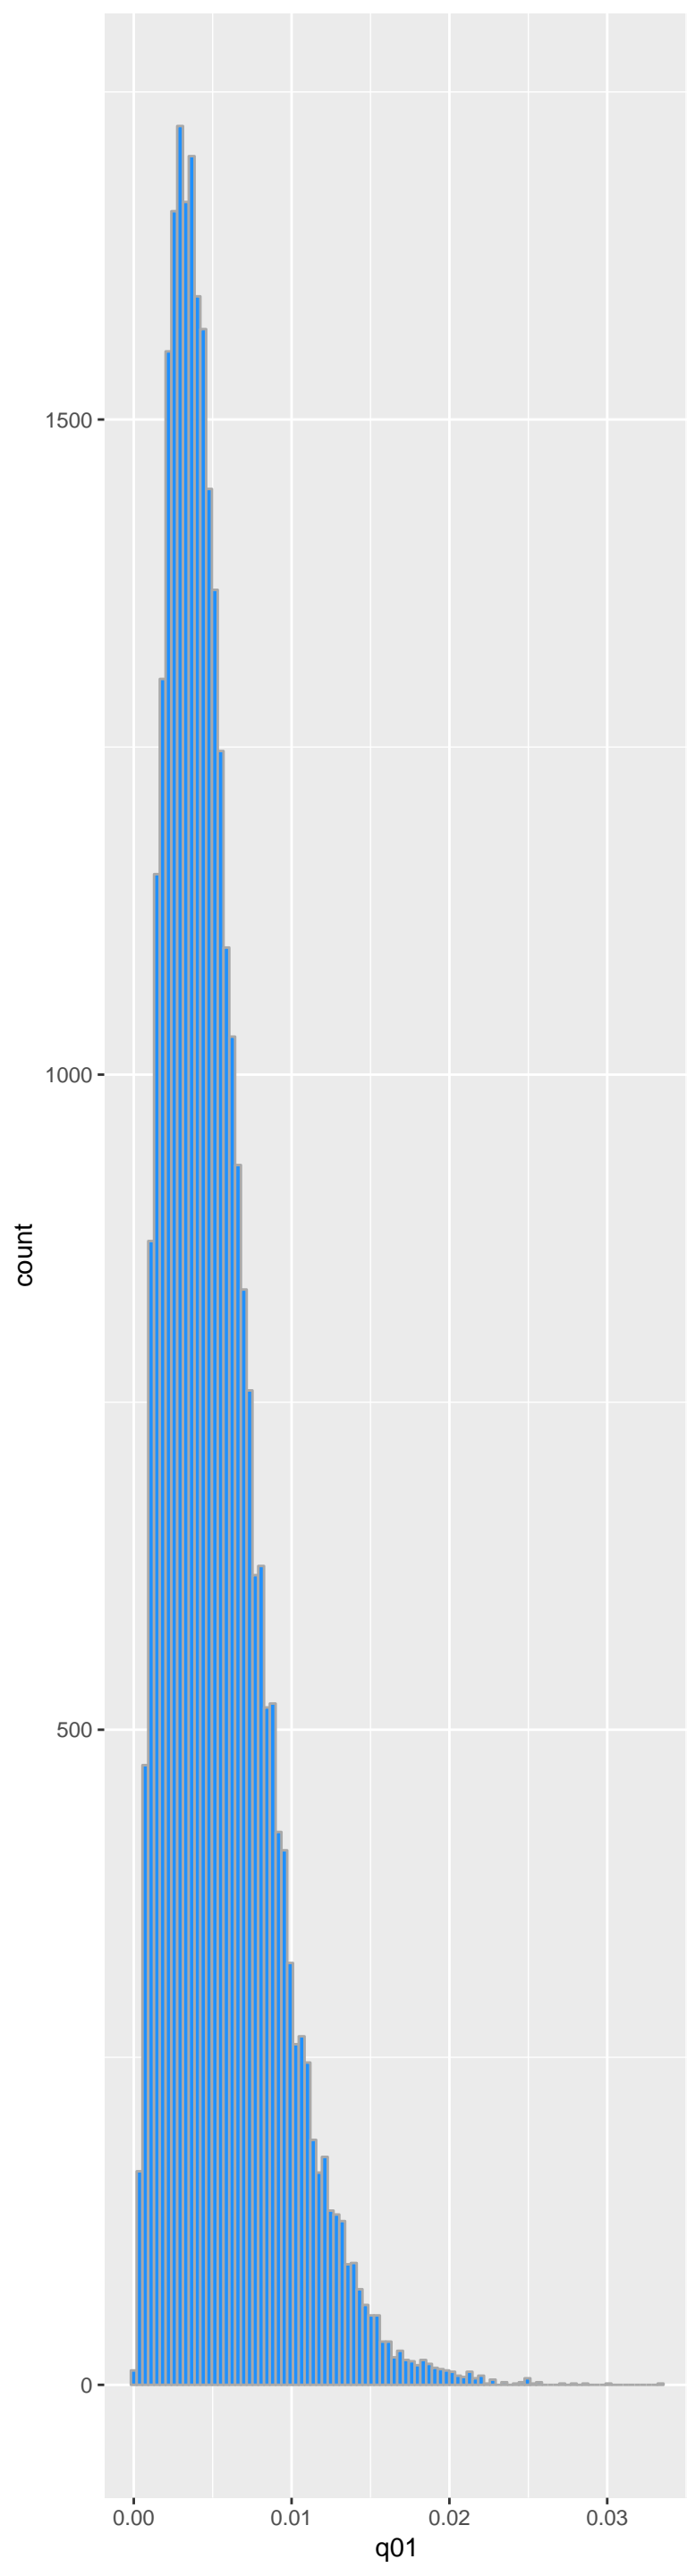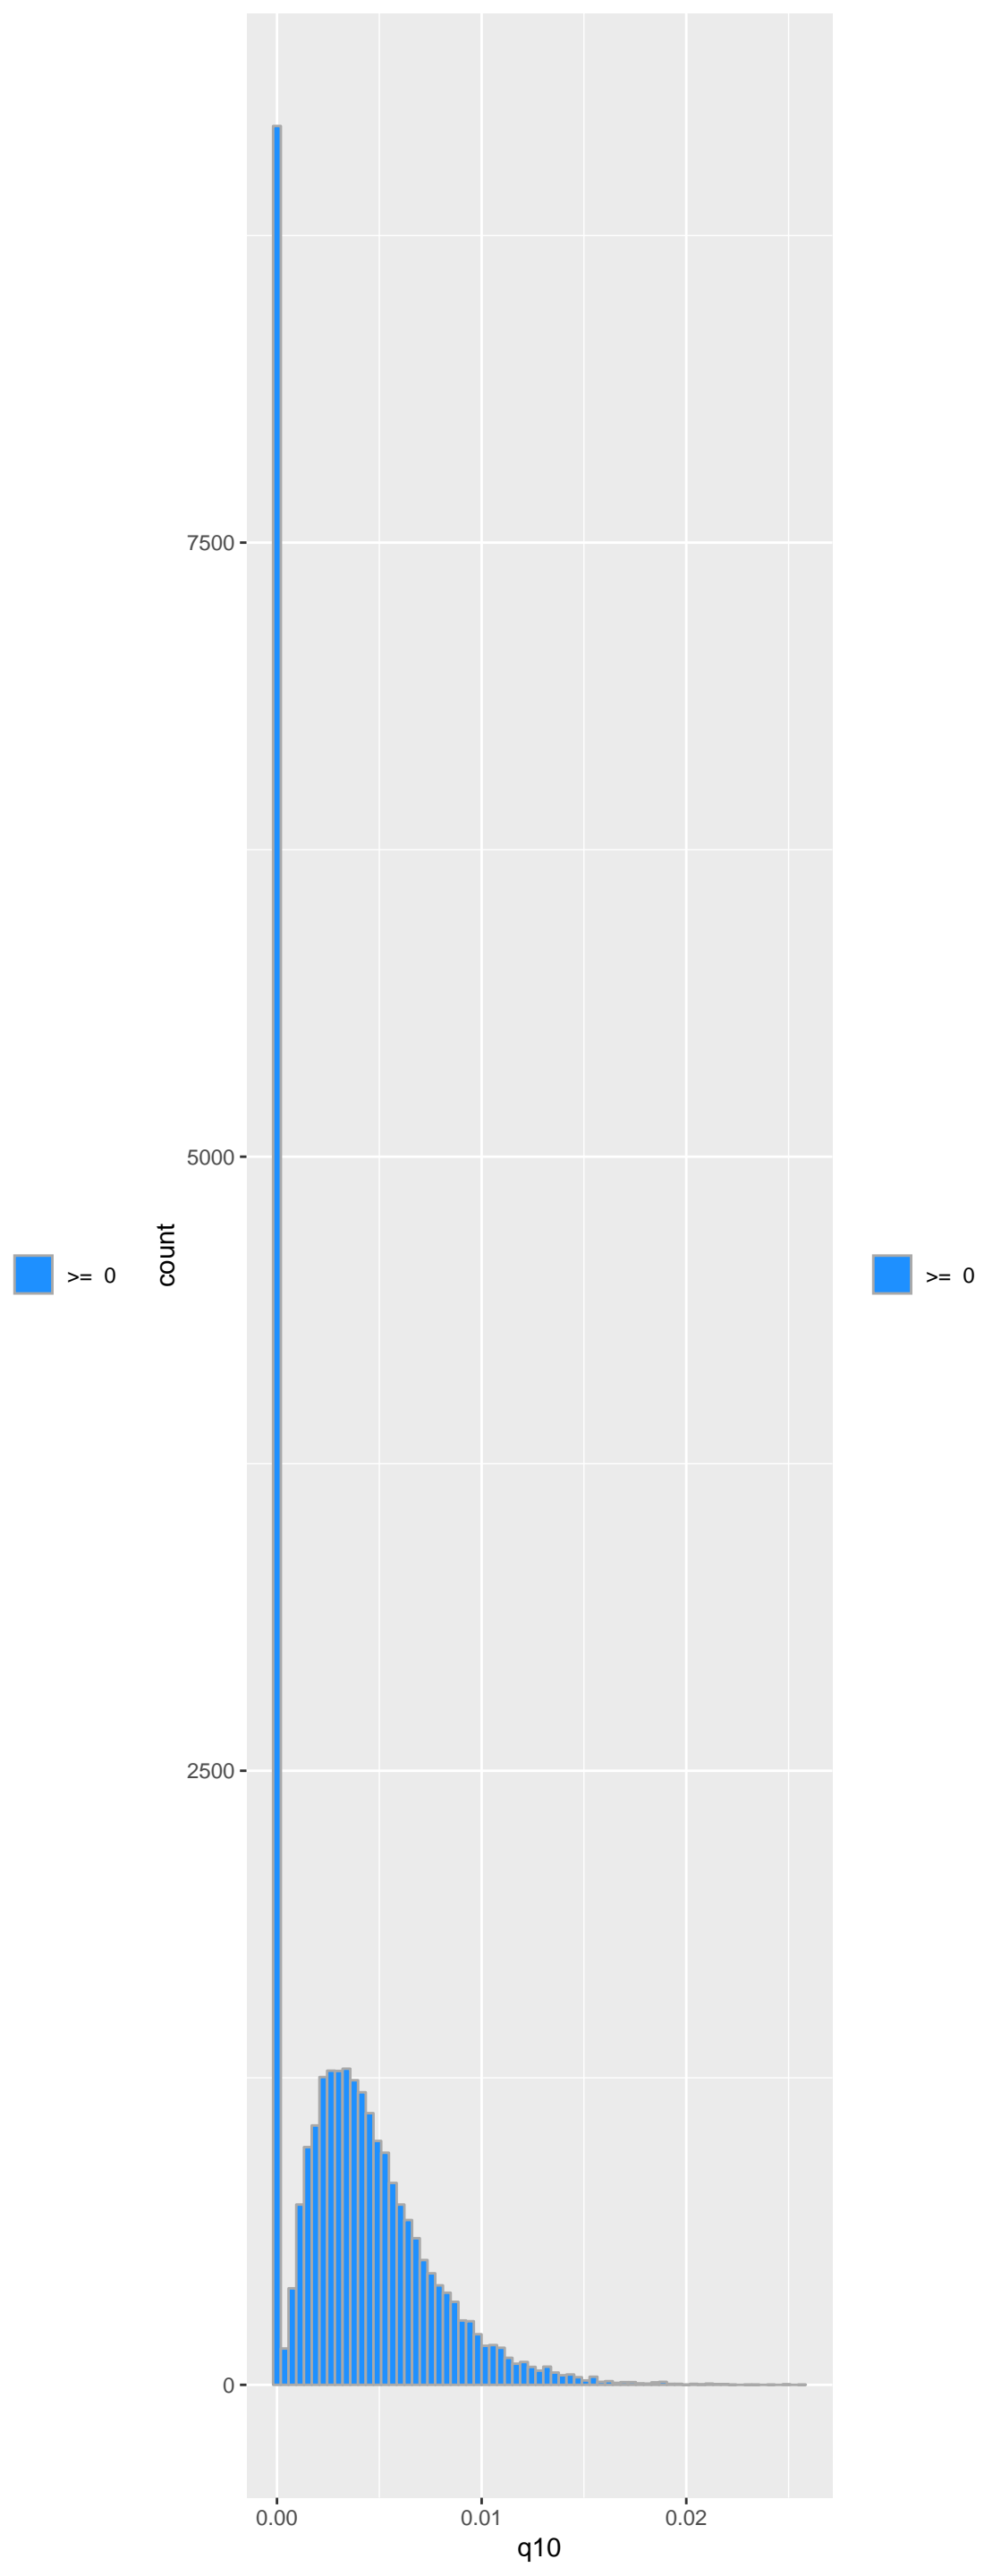



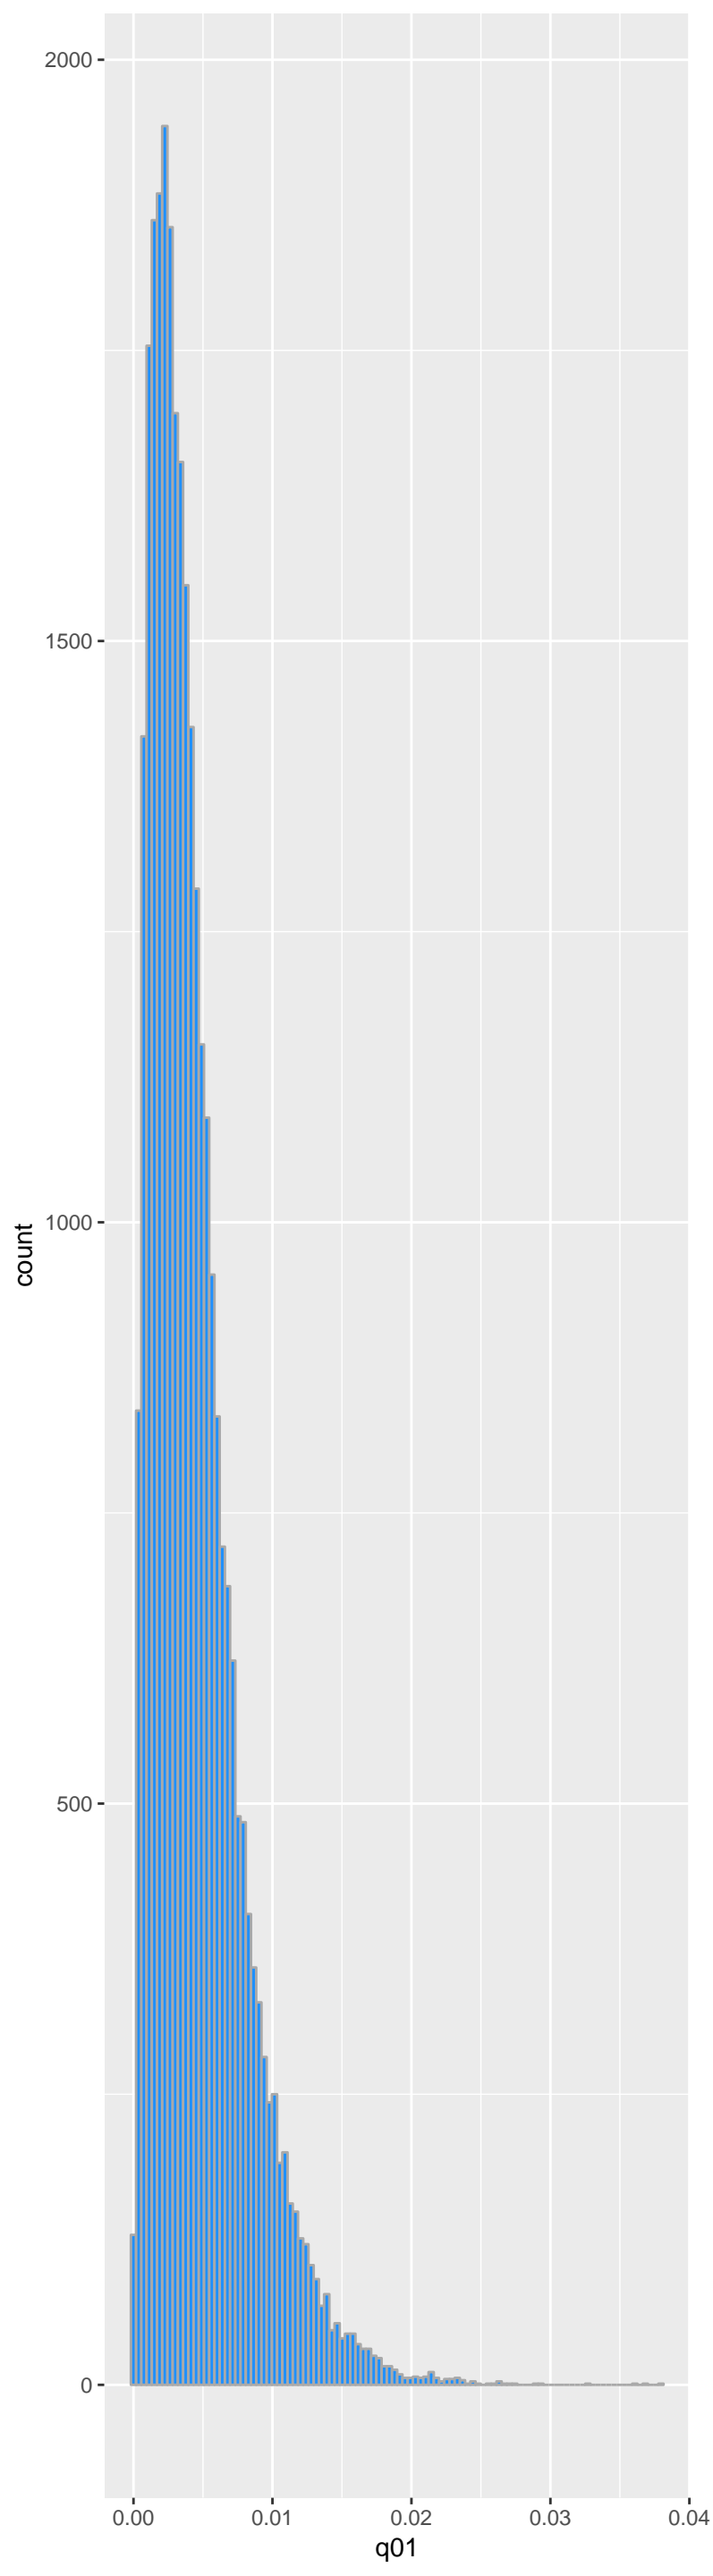

$y = 0$

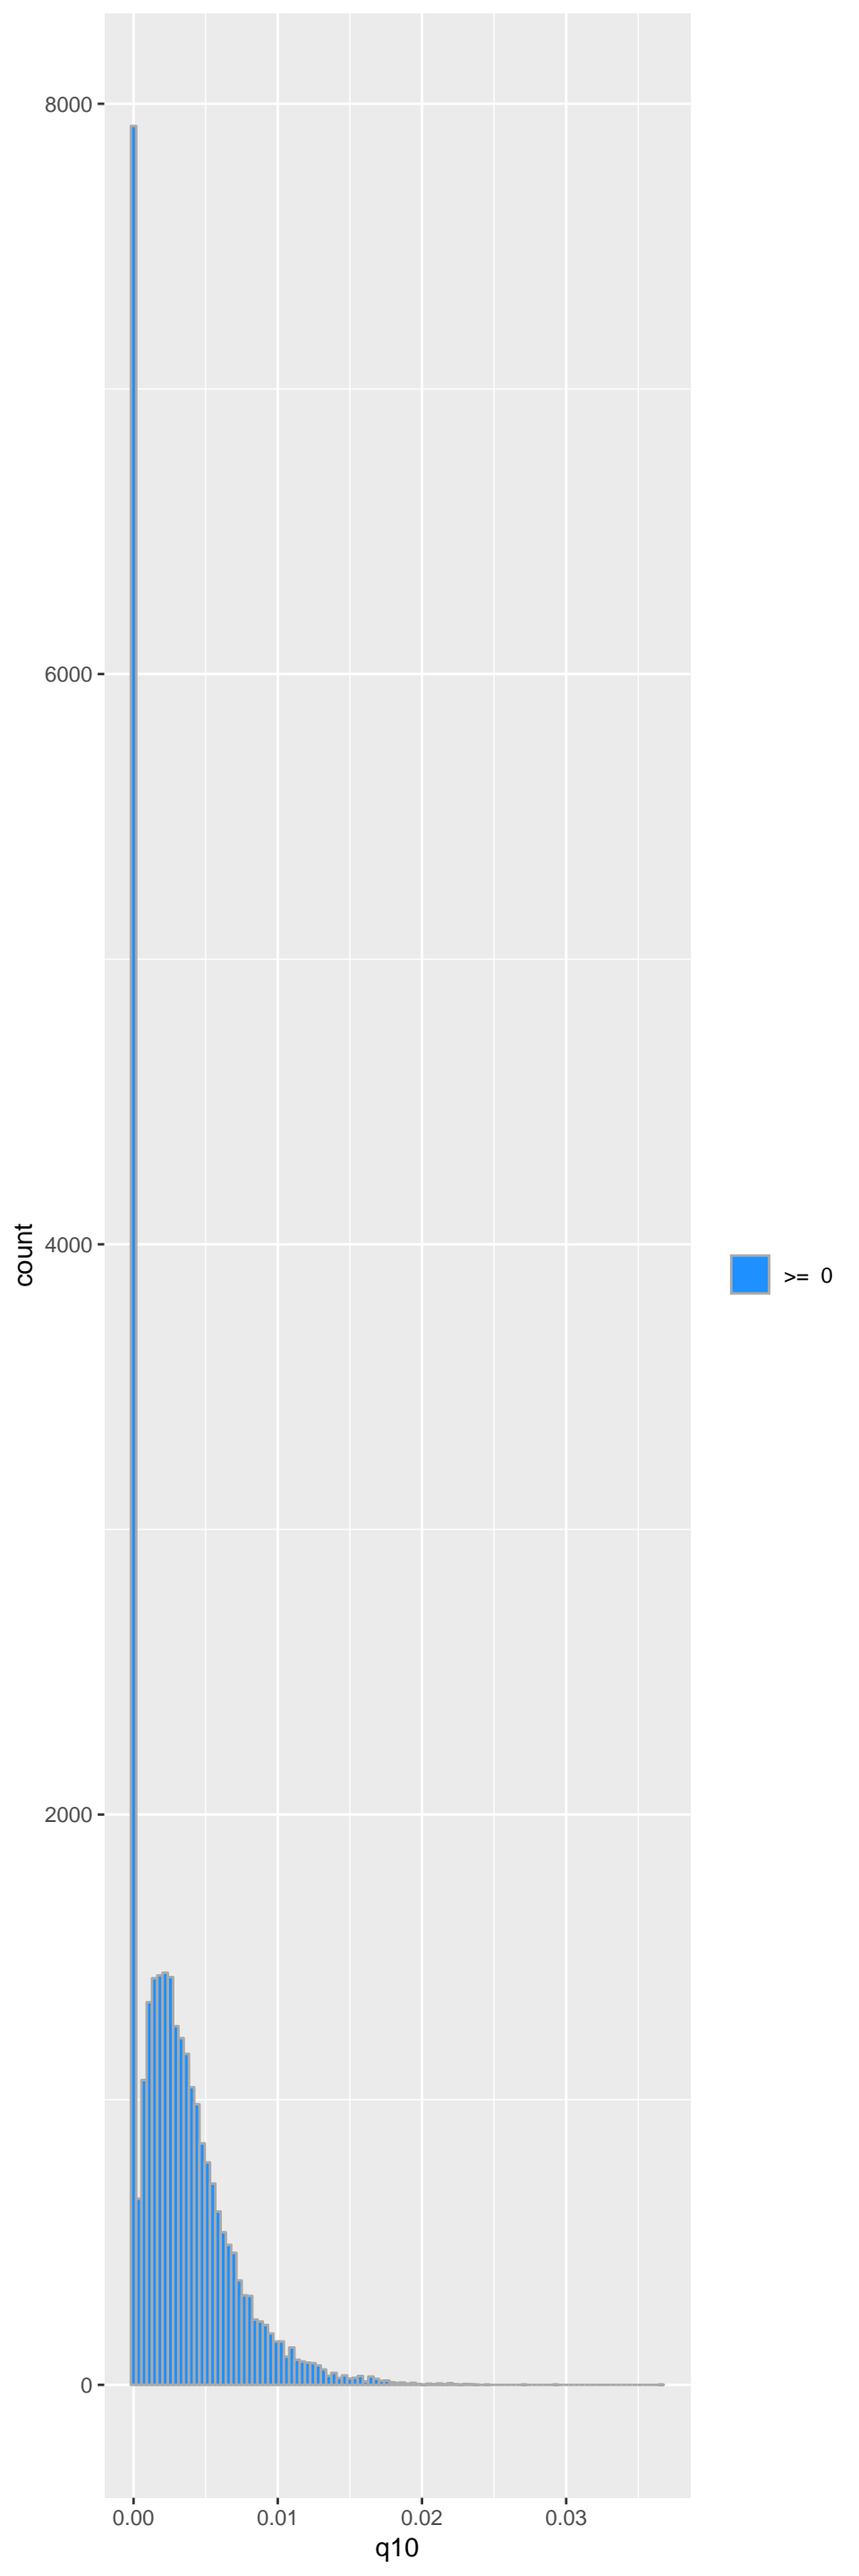

$y = 0$

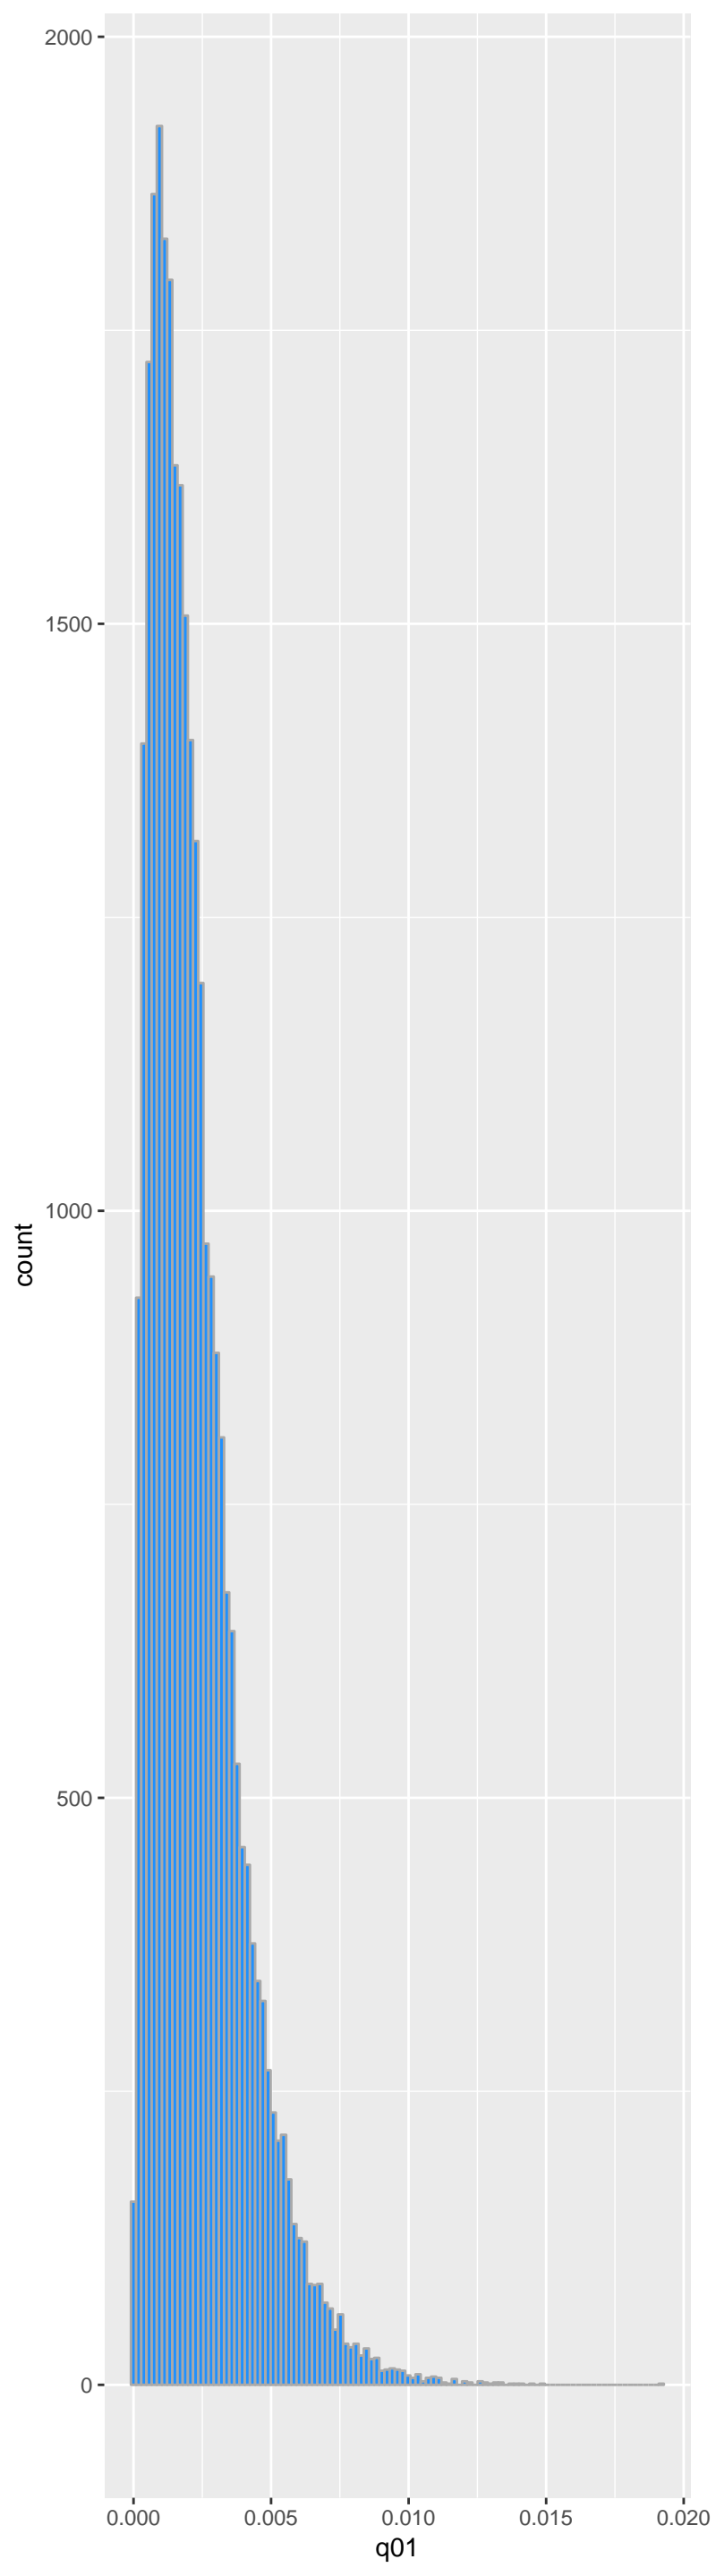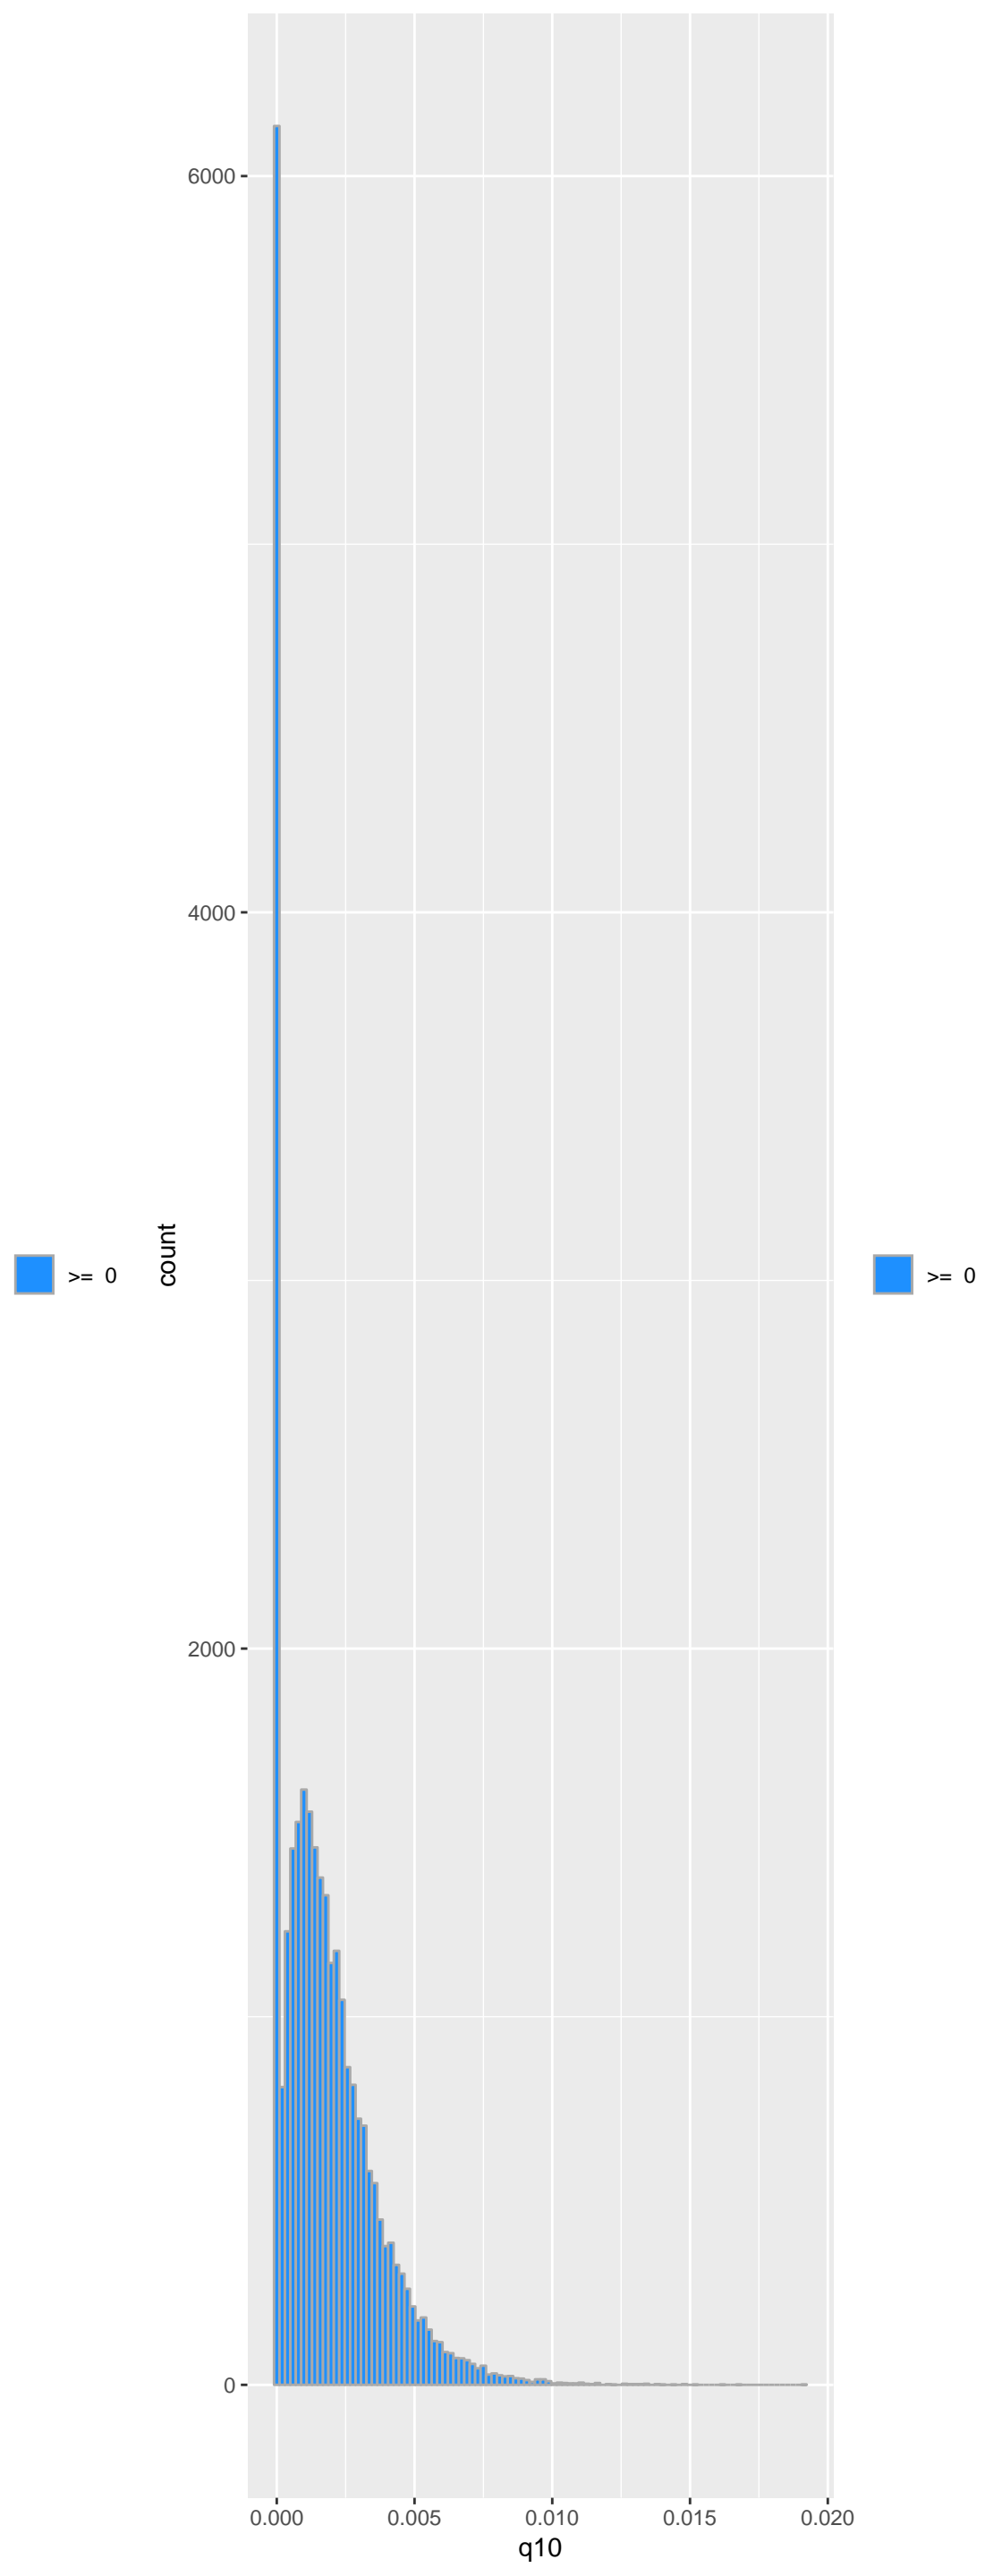

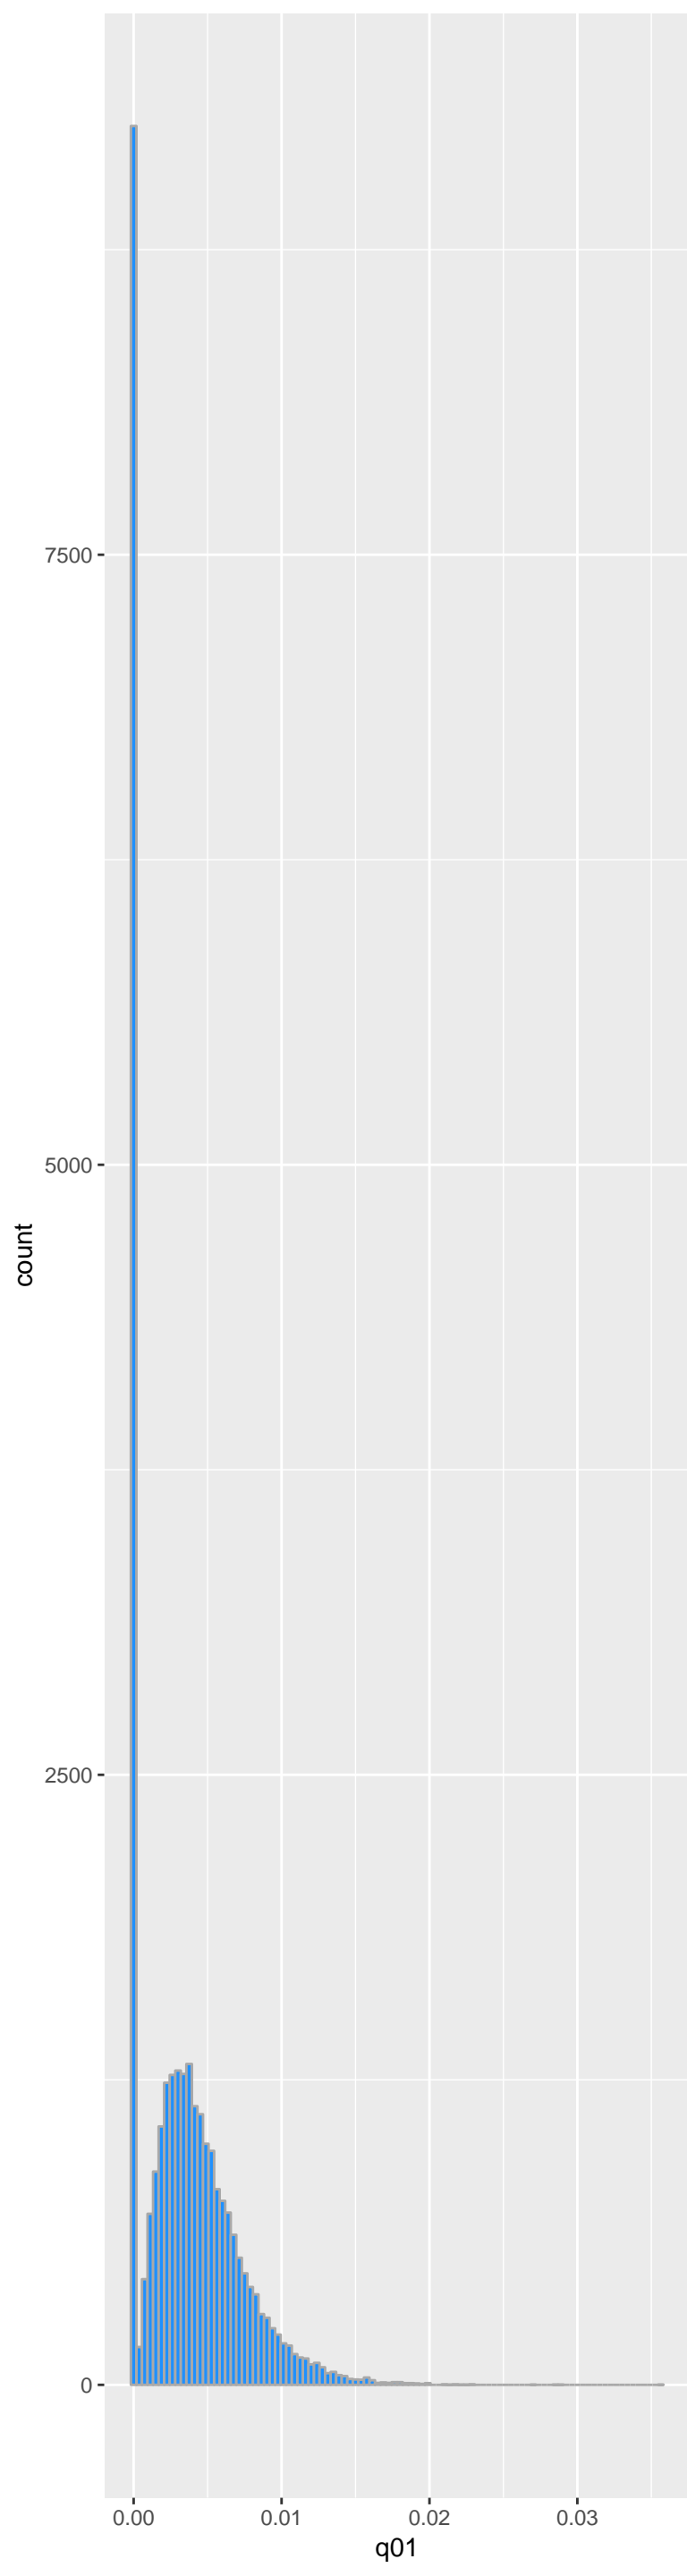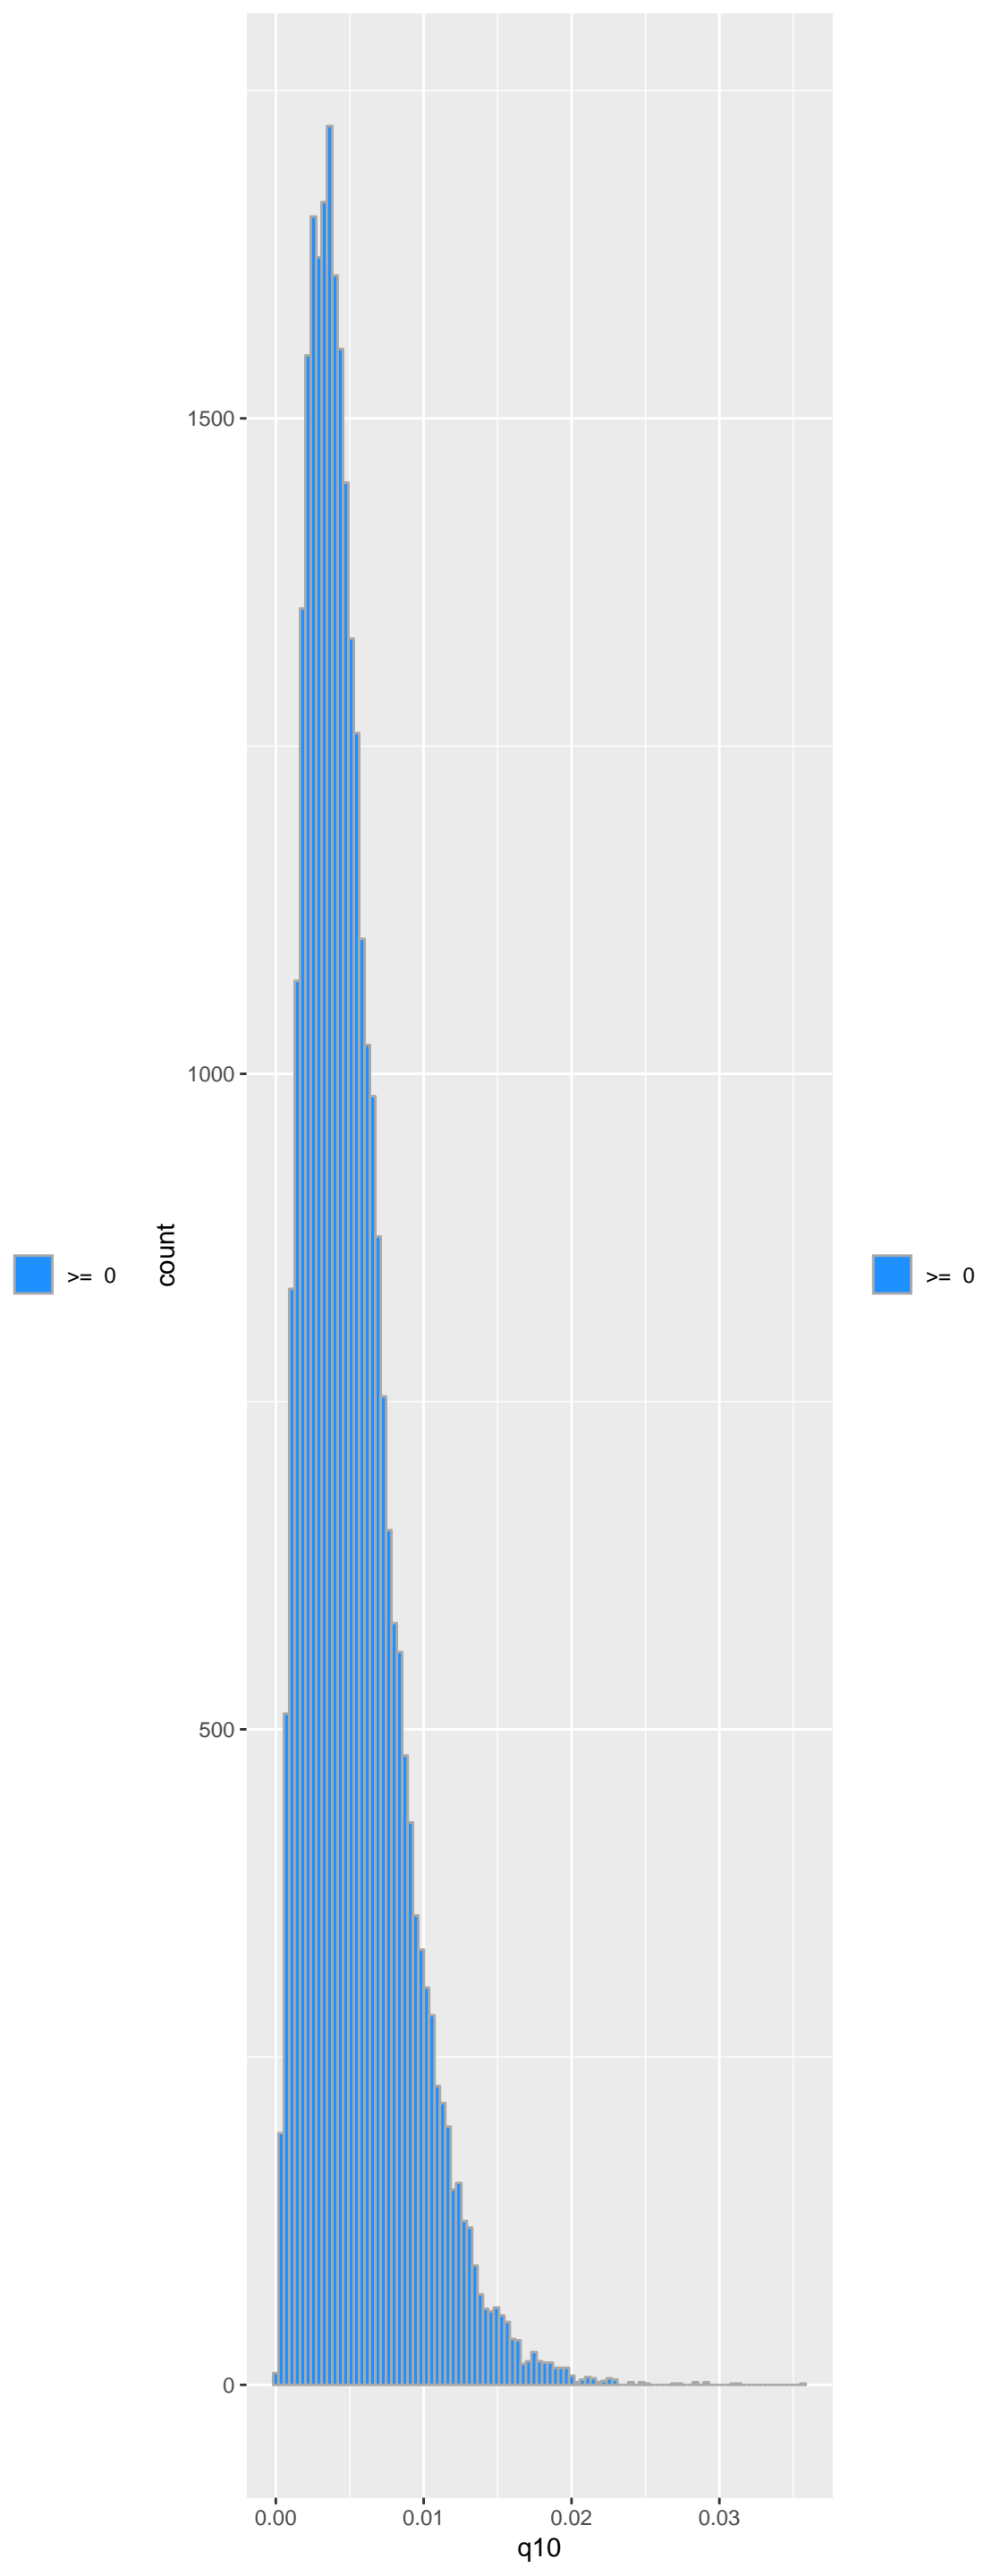

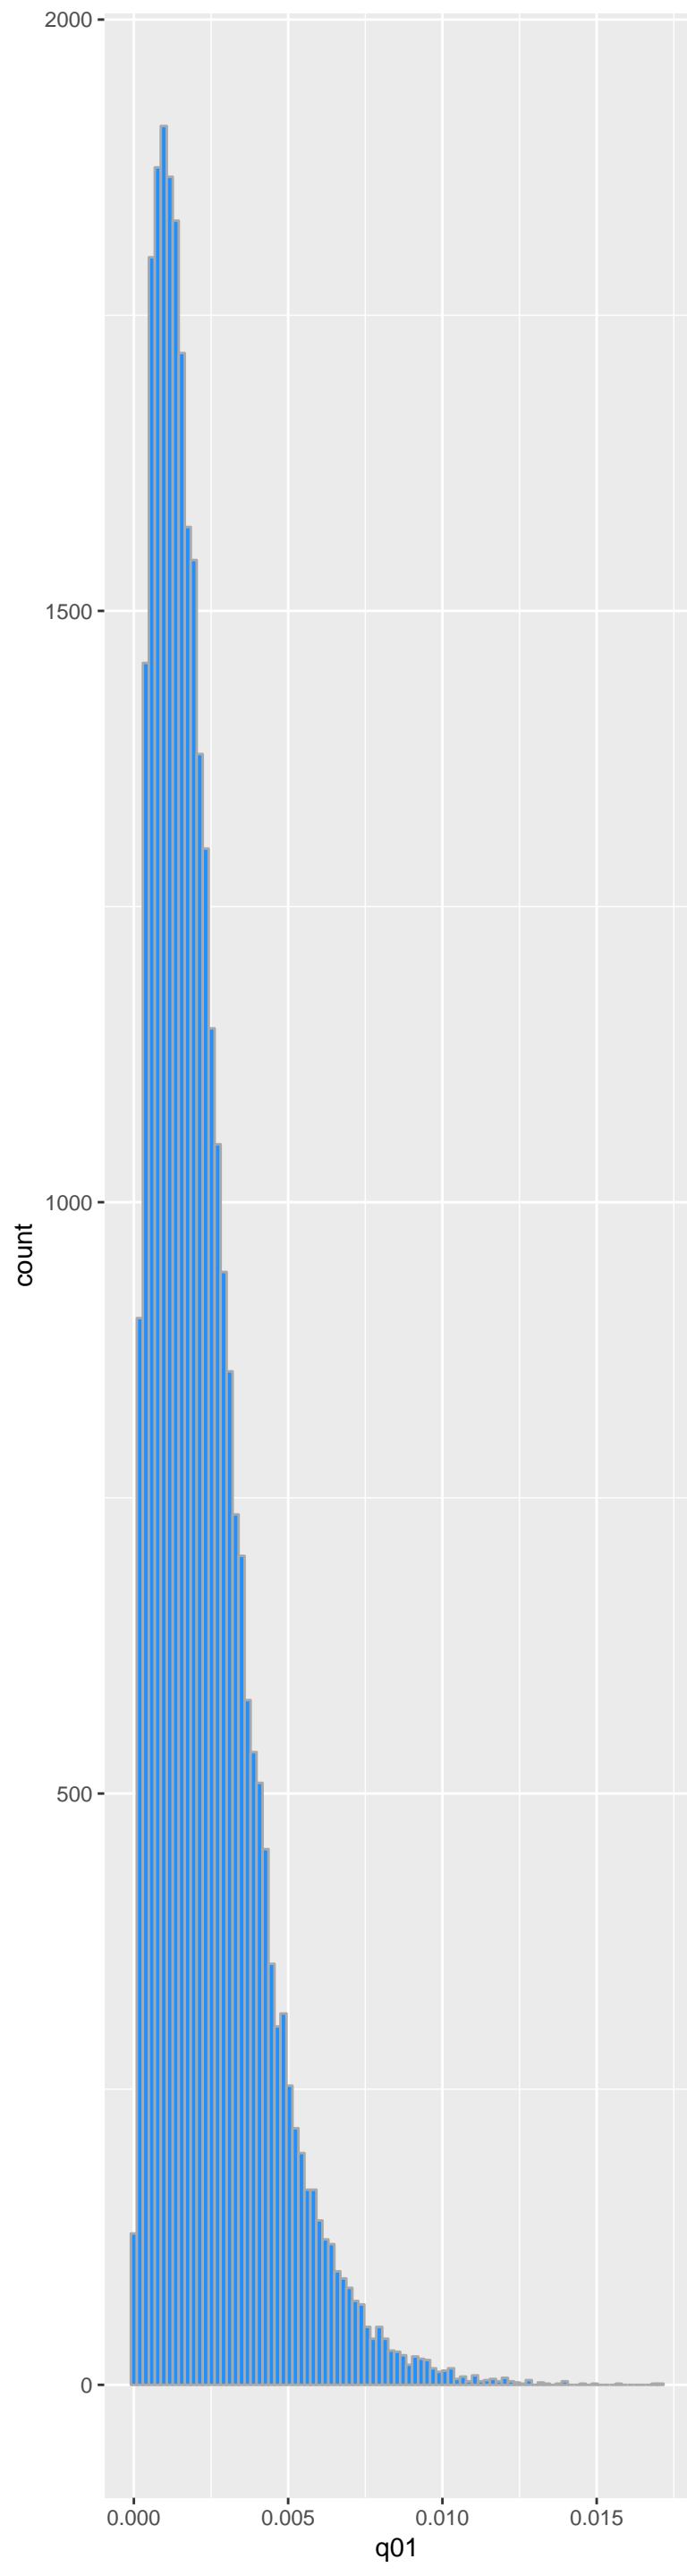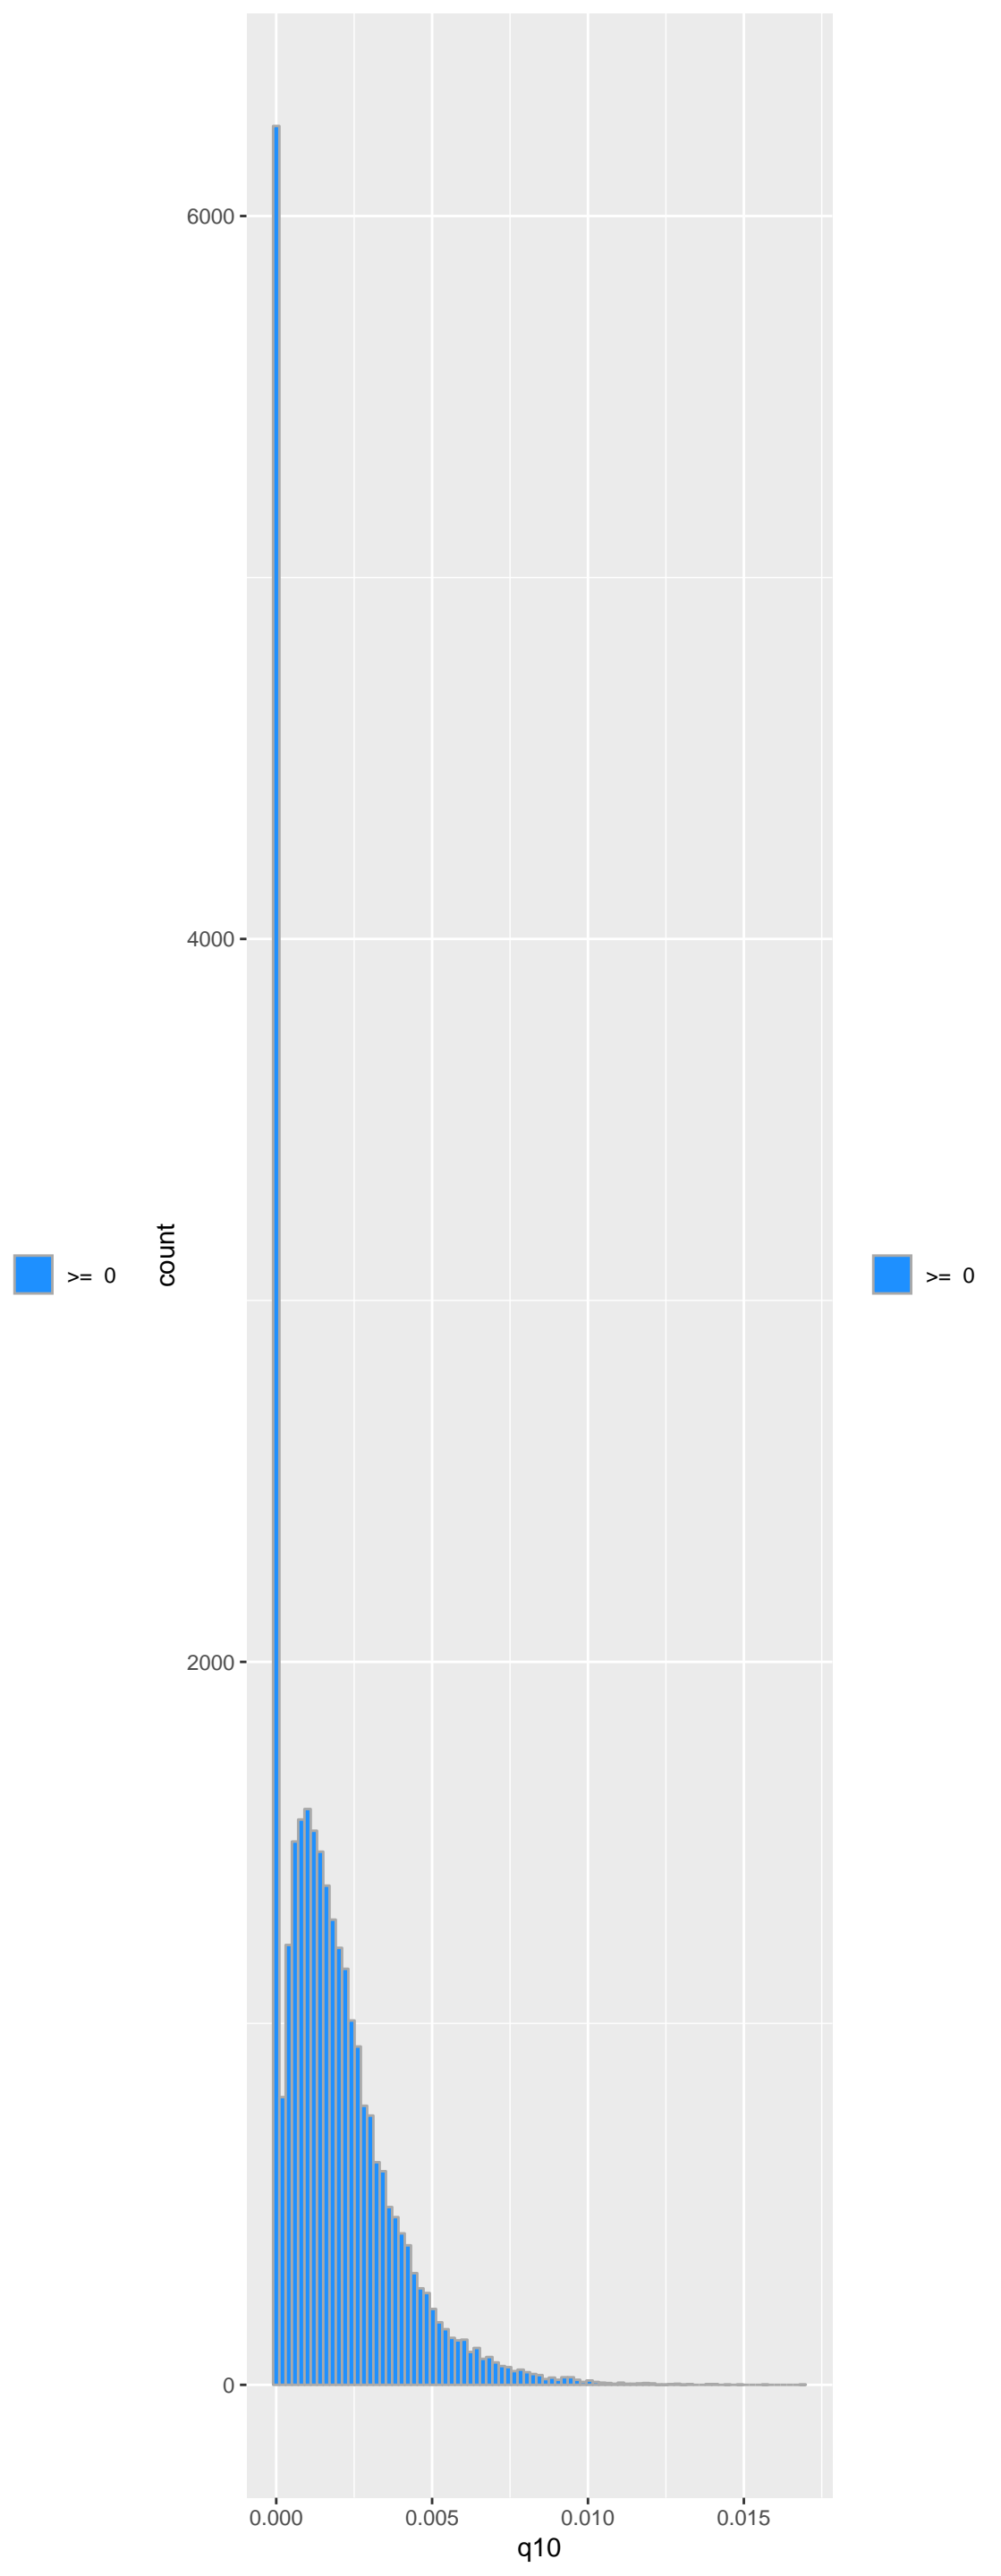

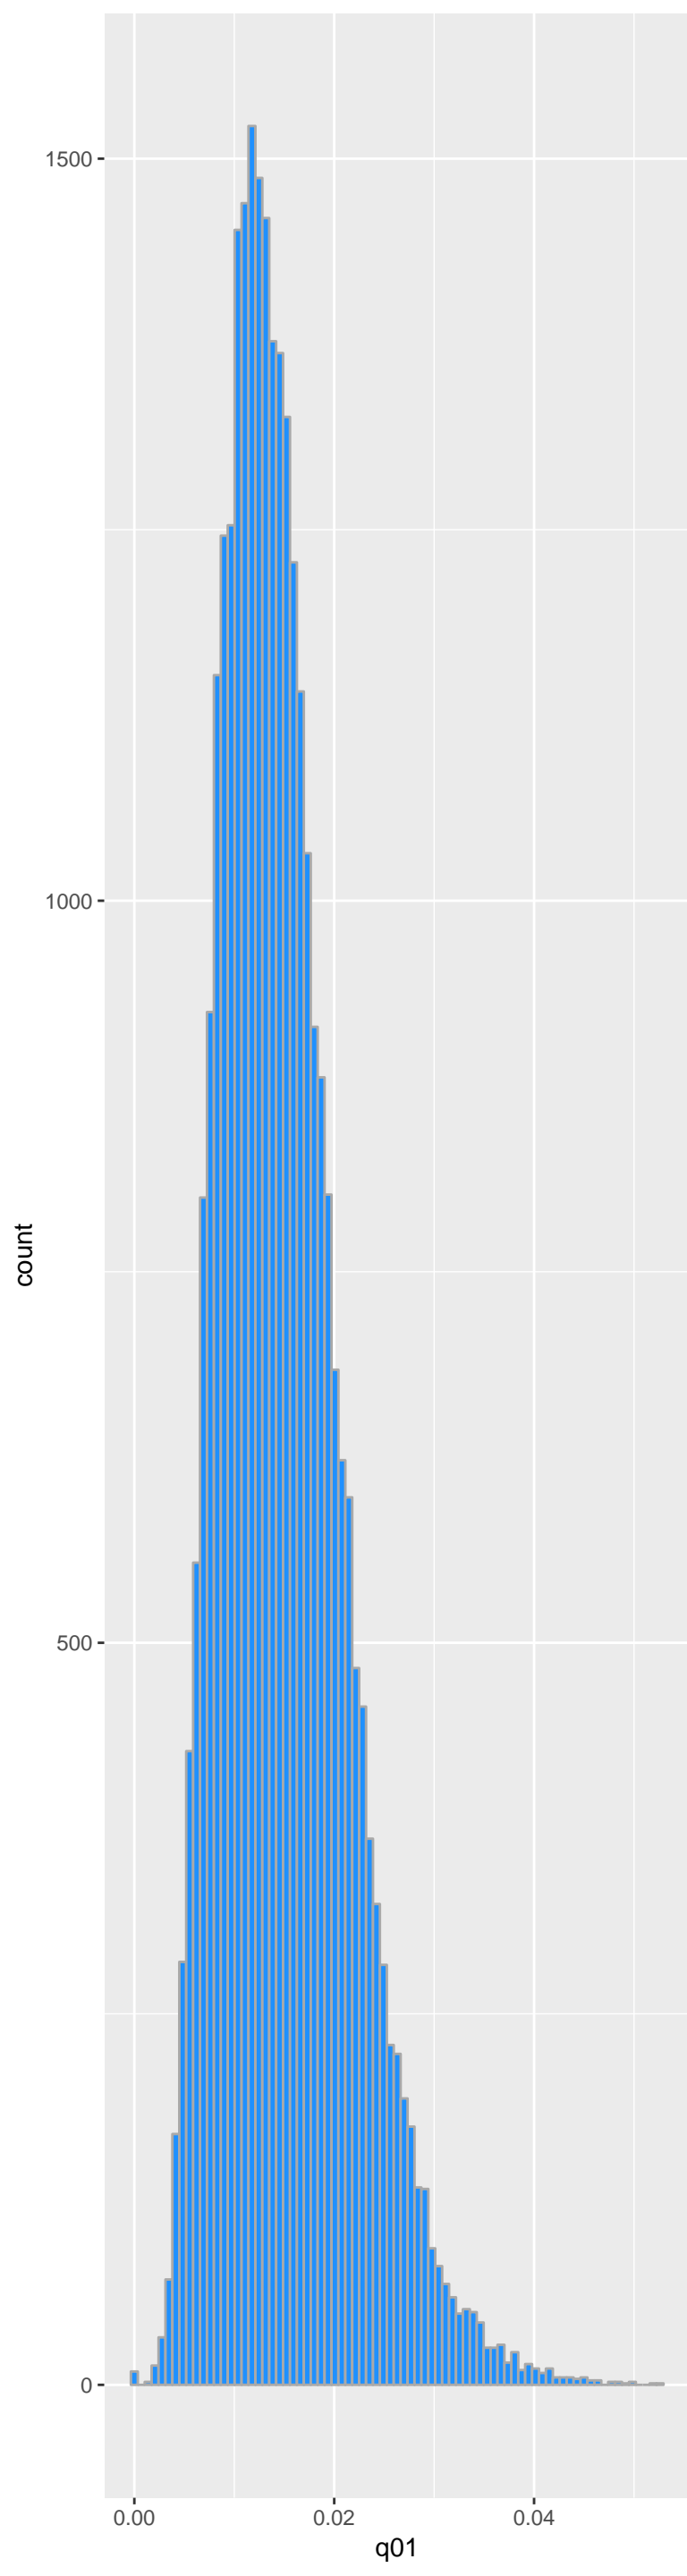

y = 0

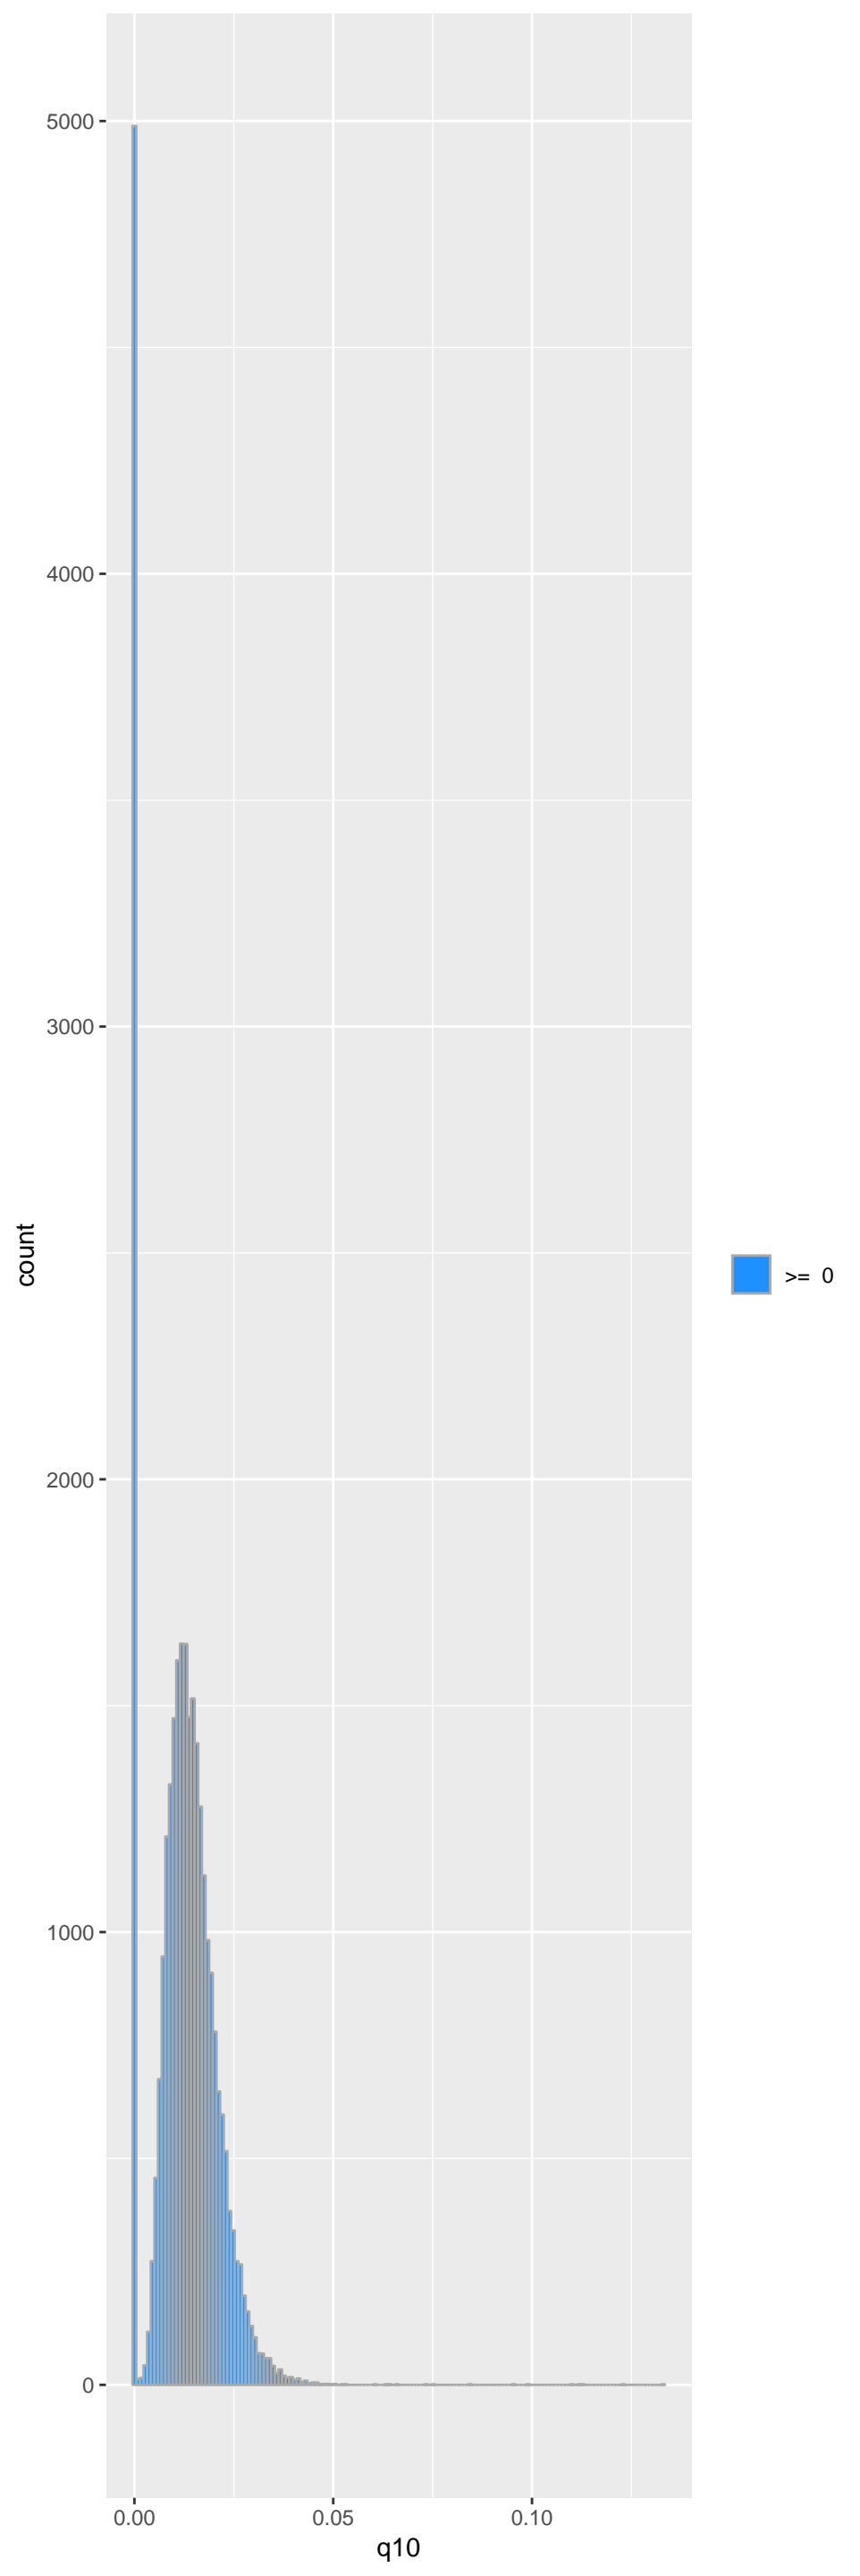

y = 0

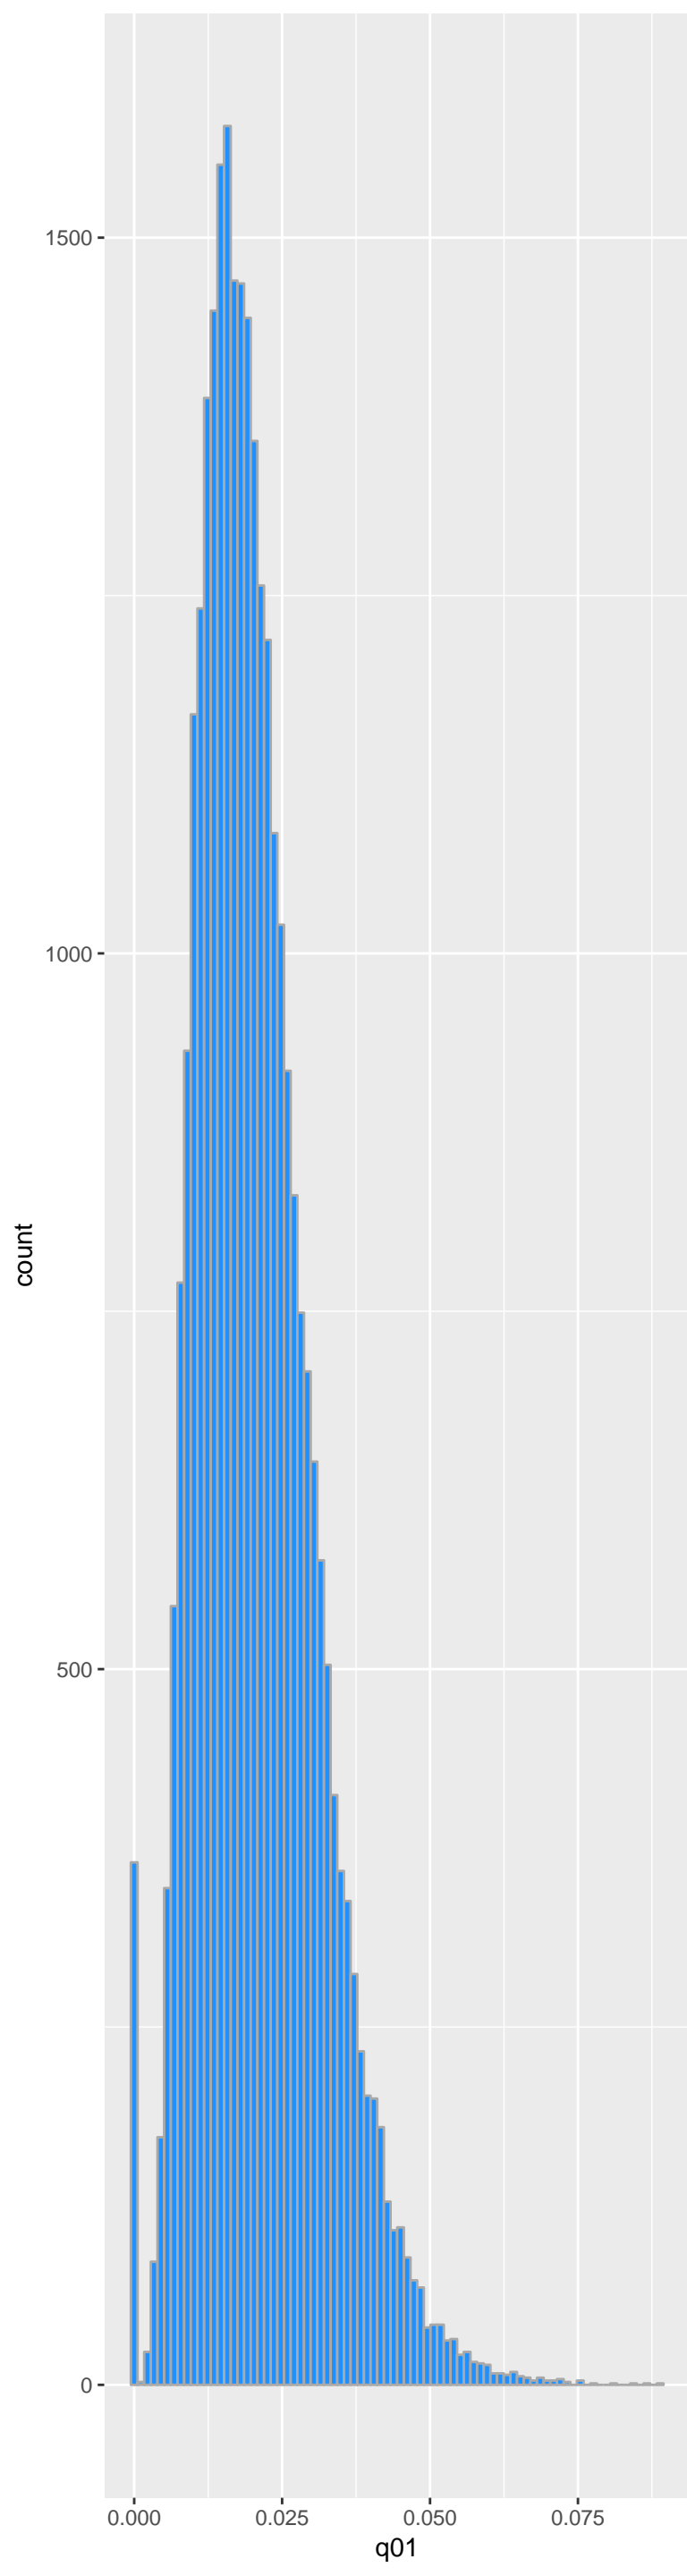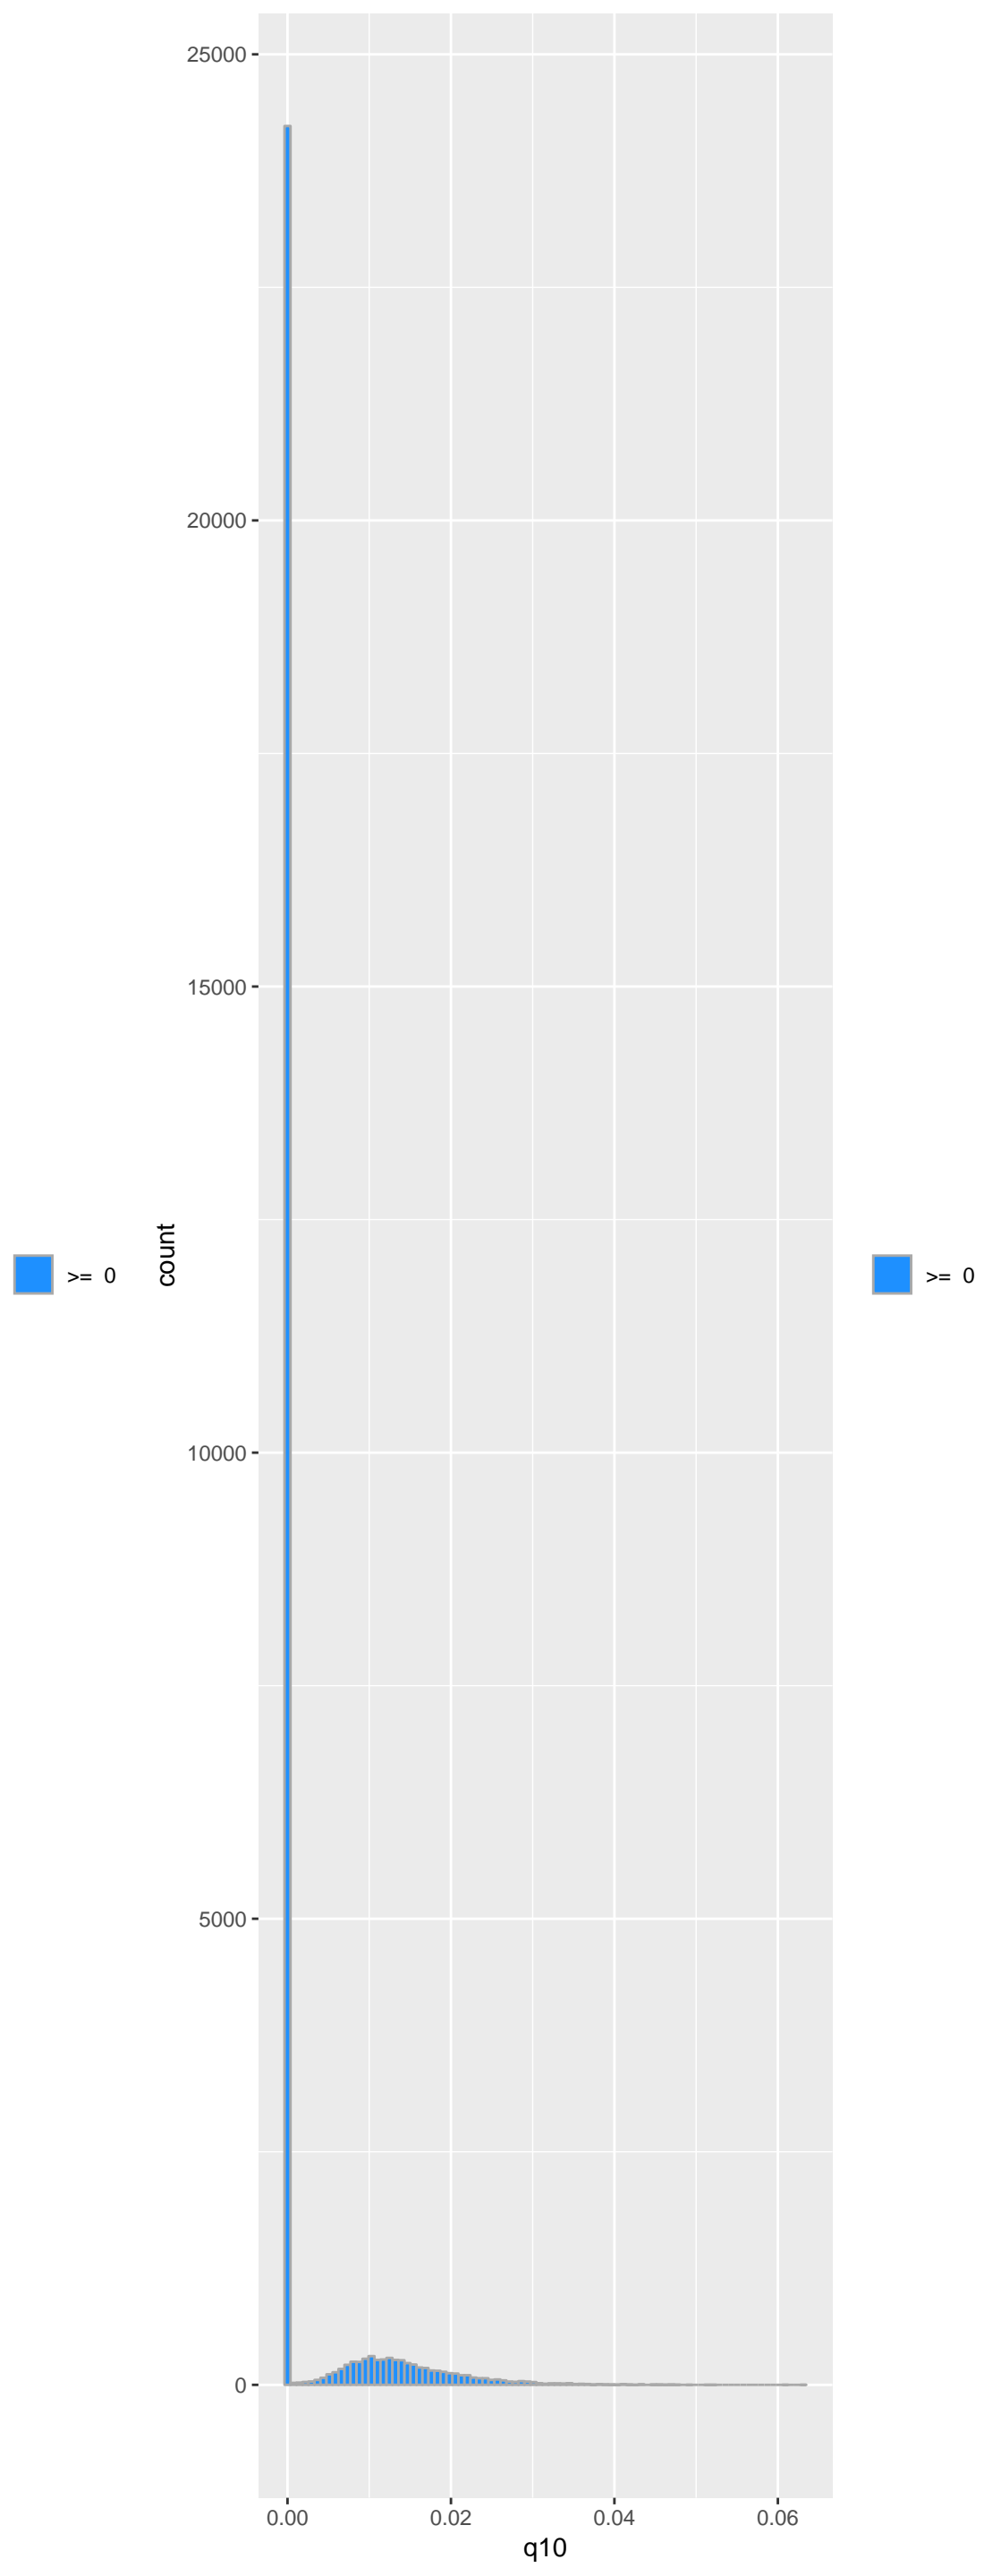

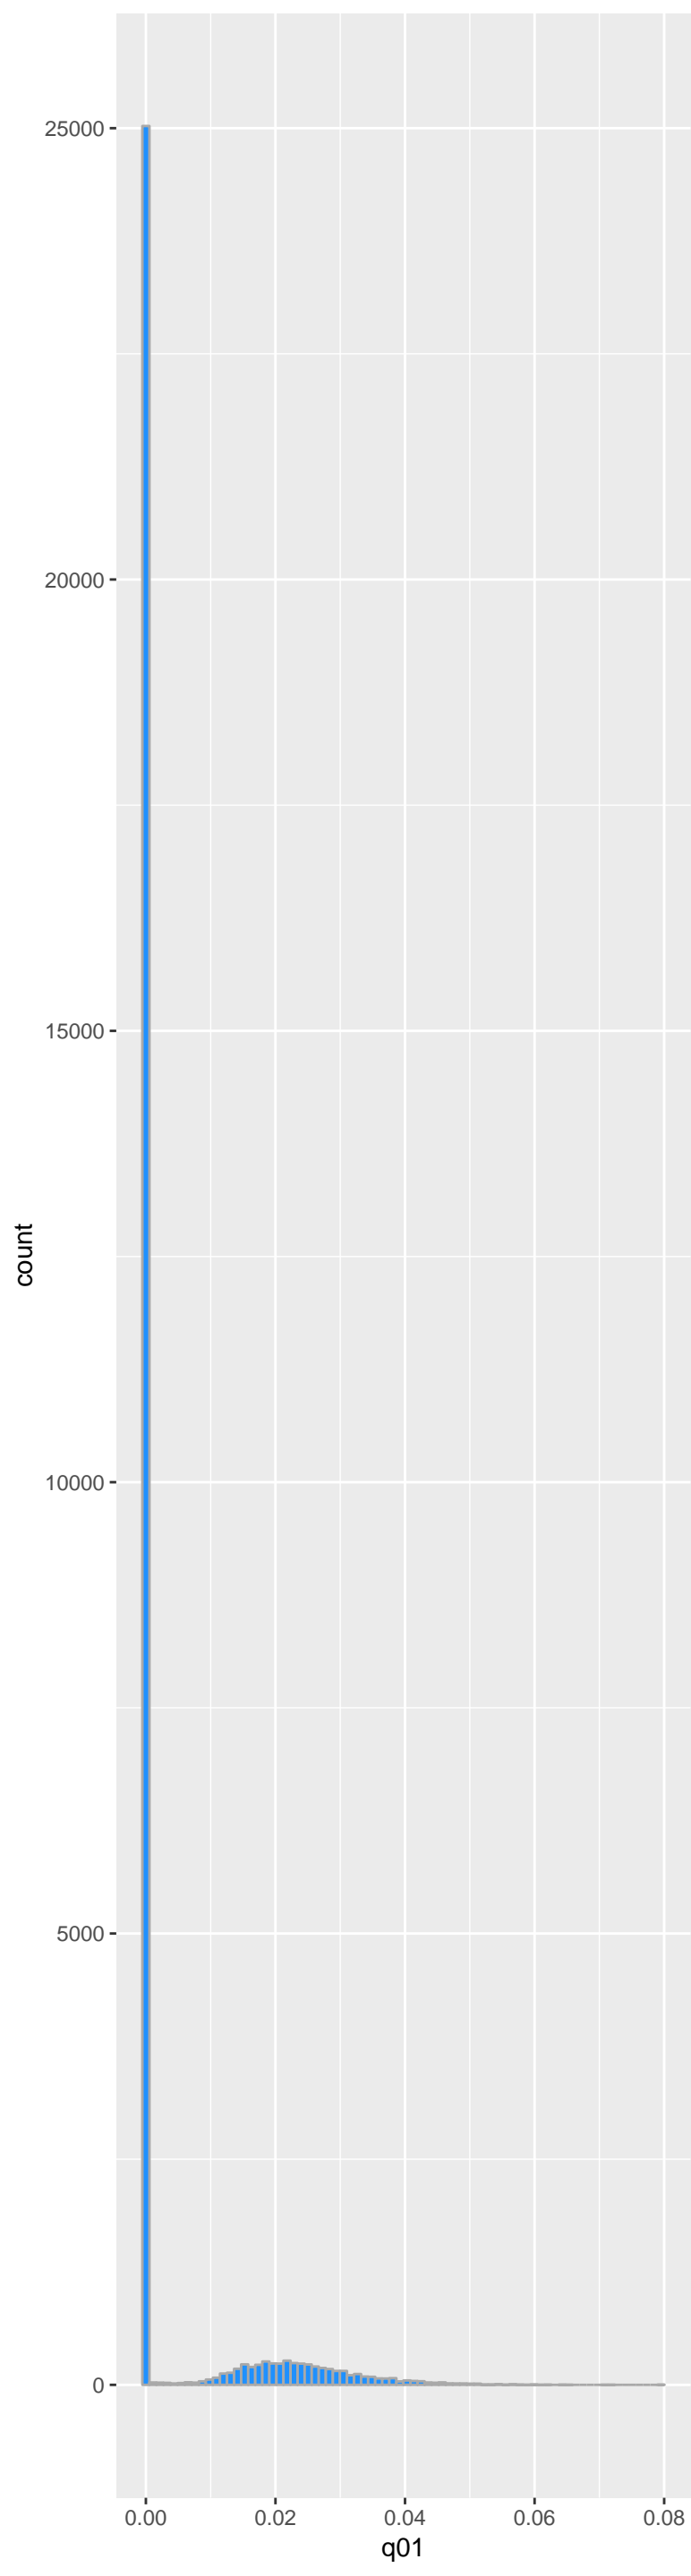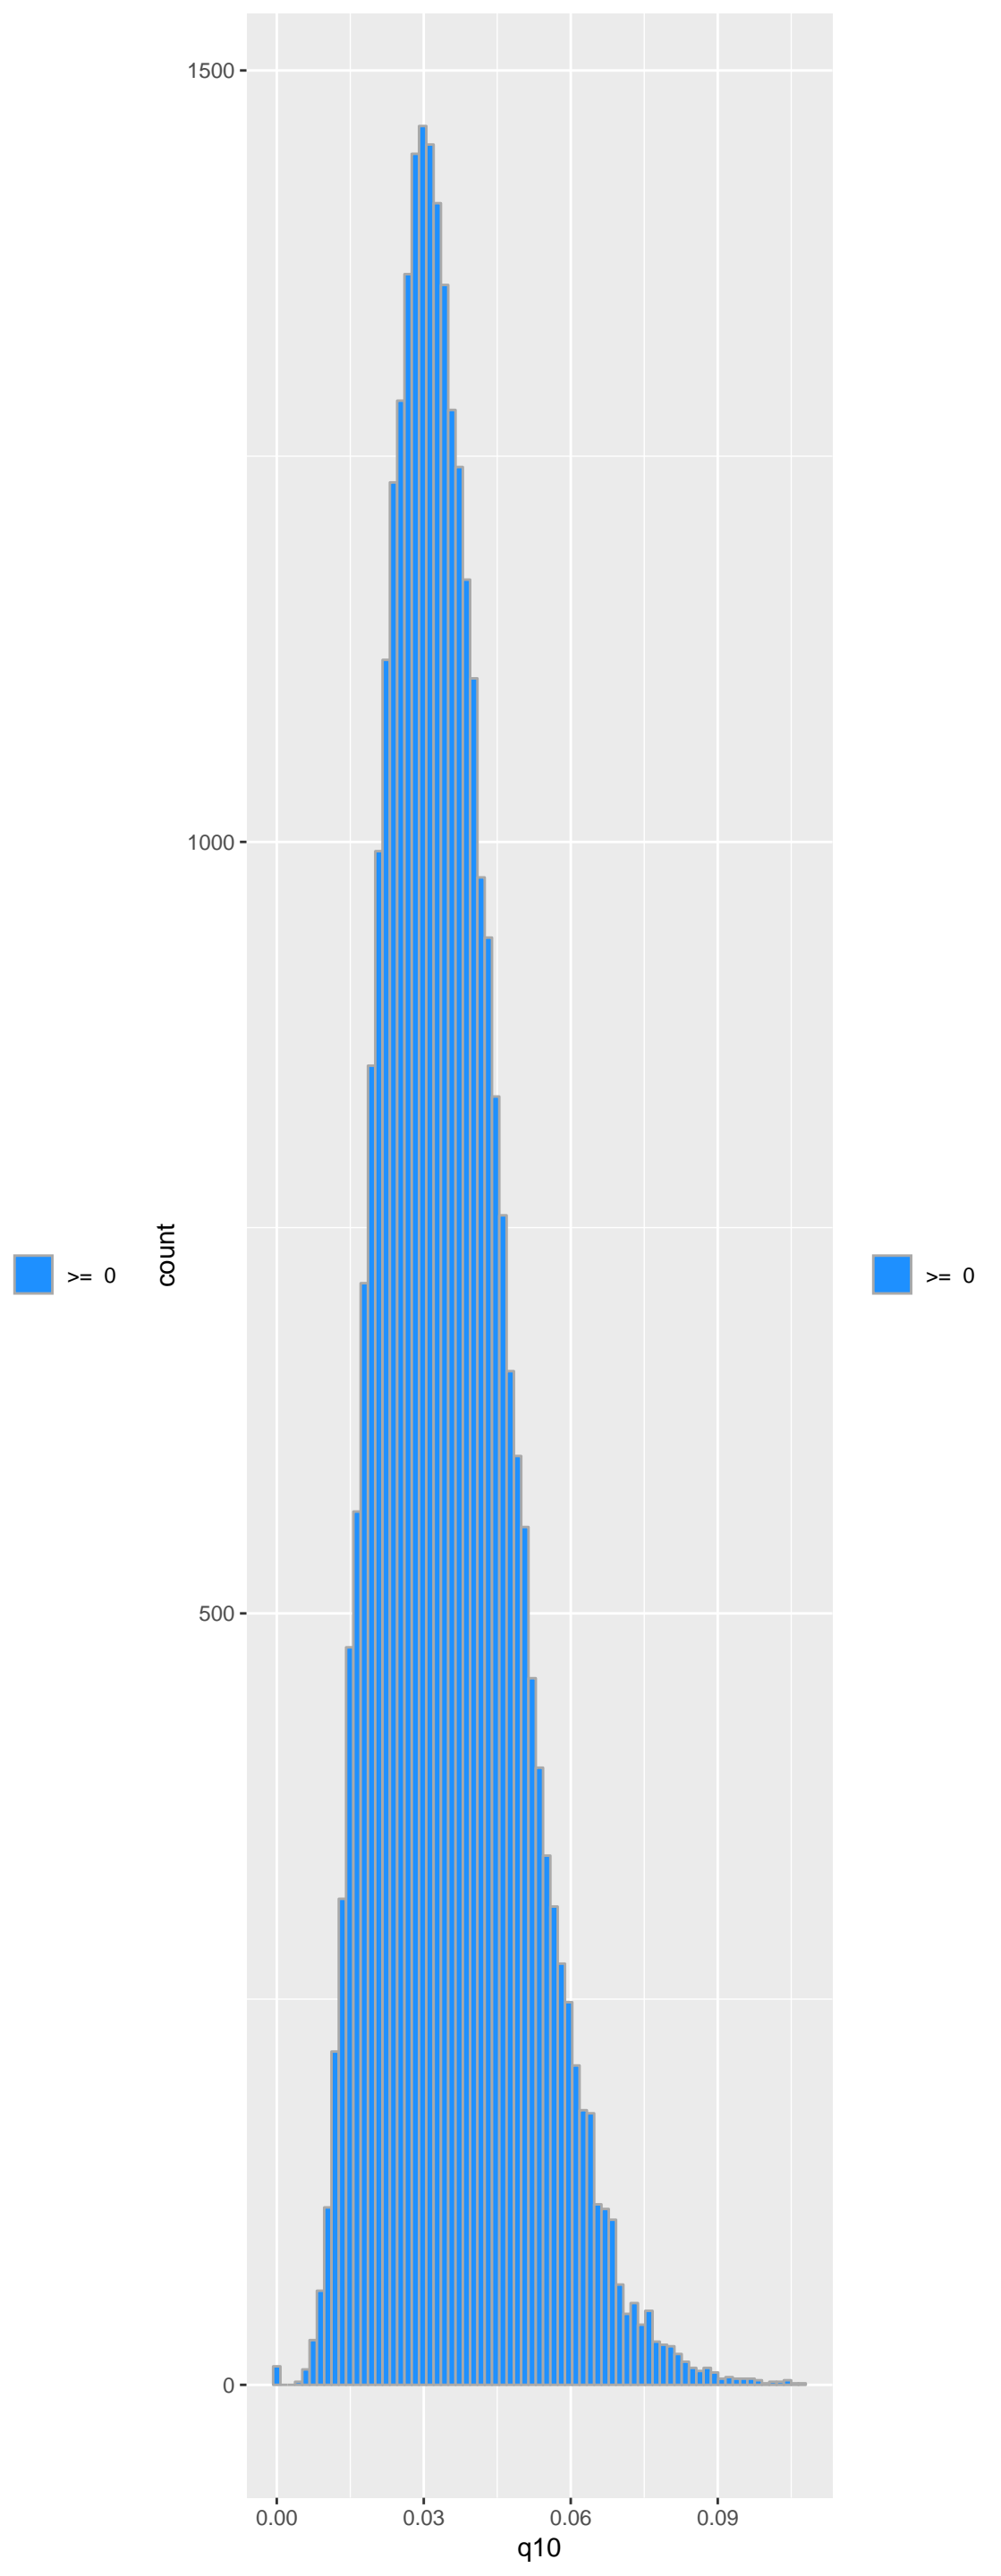

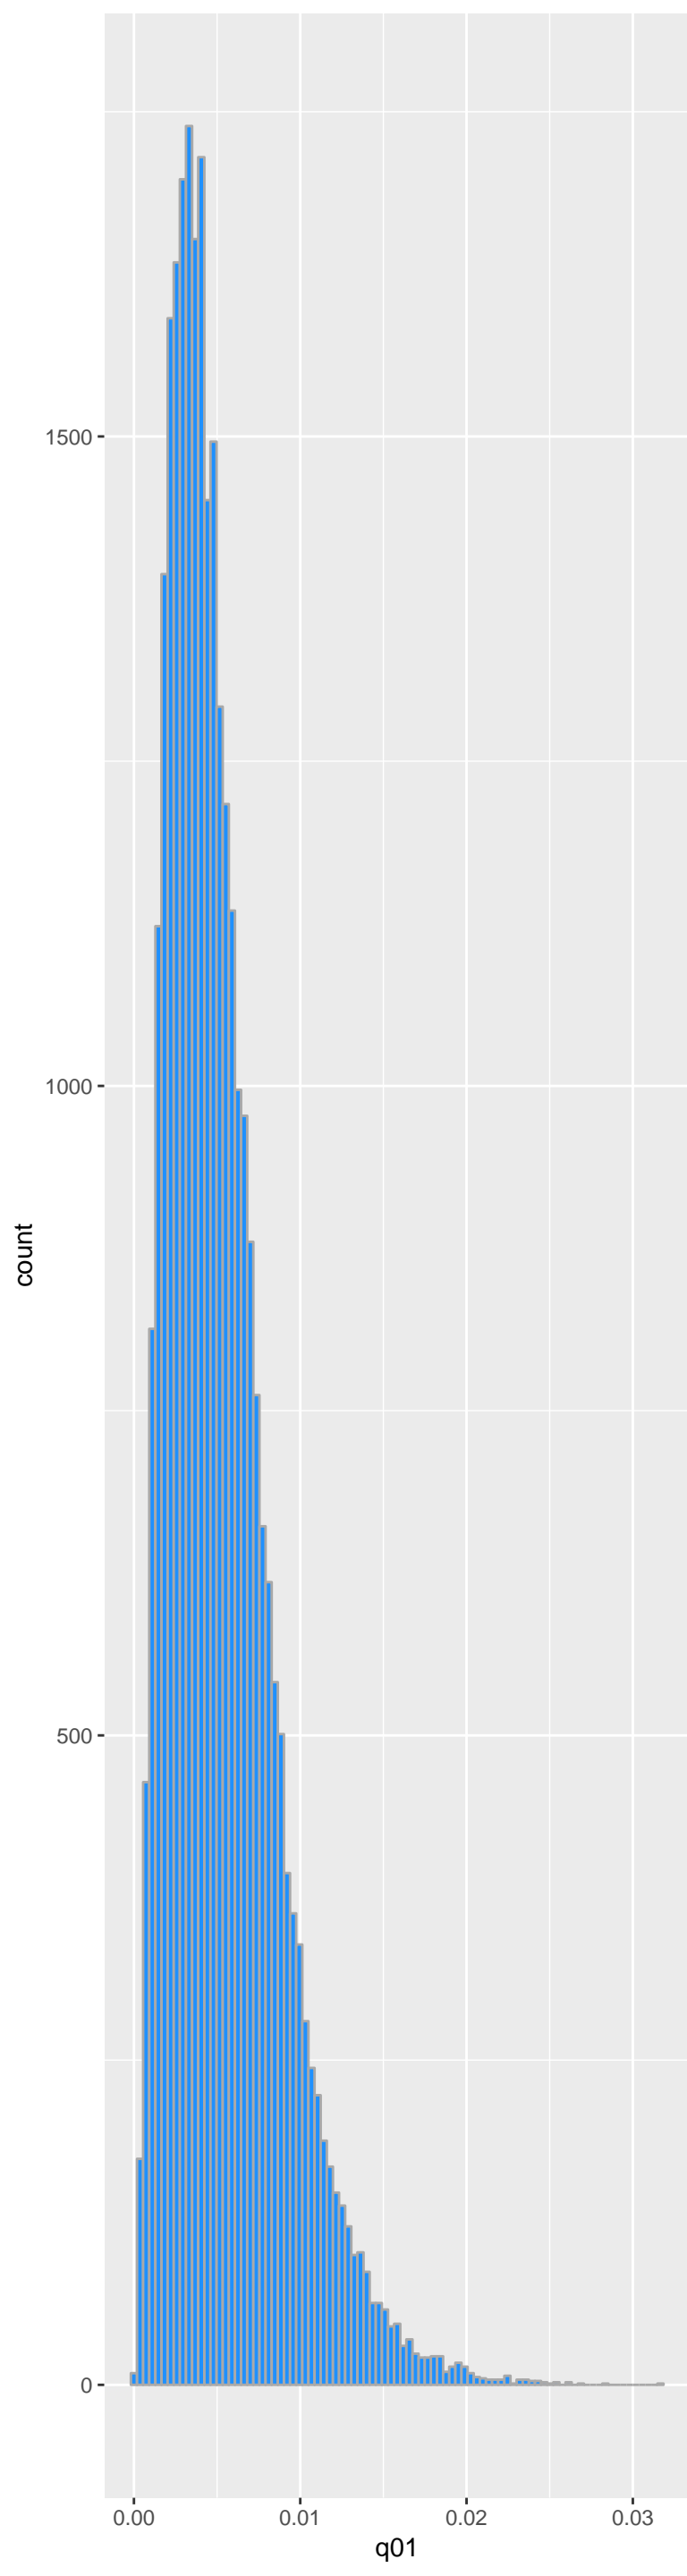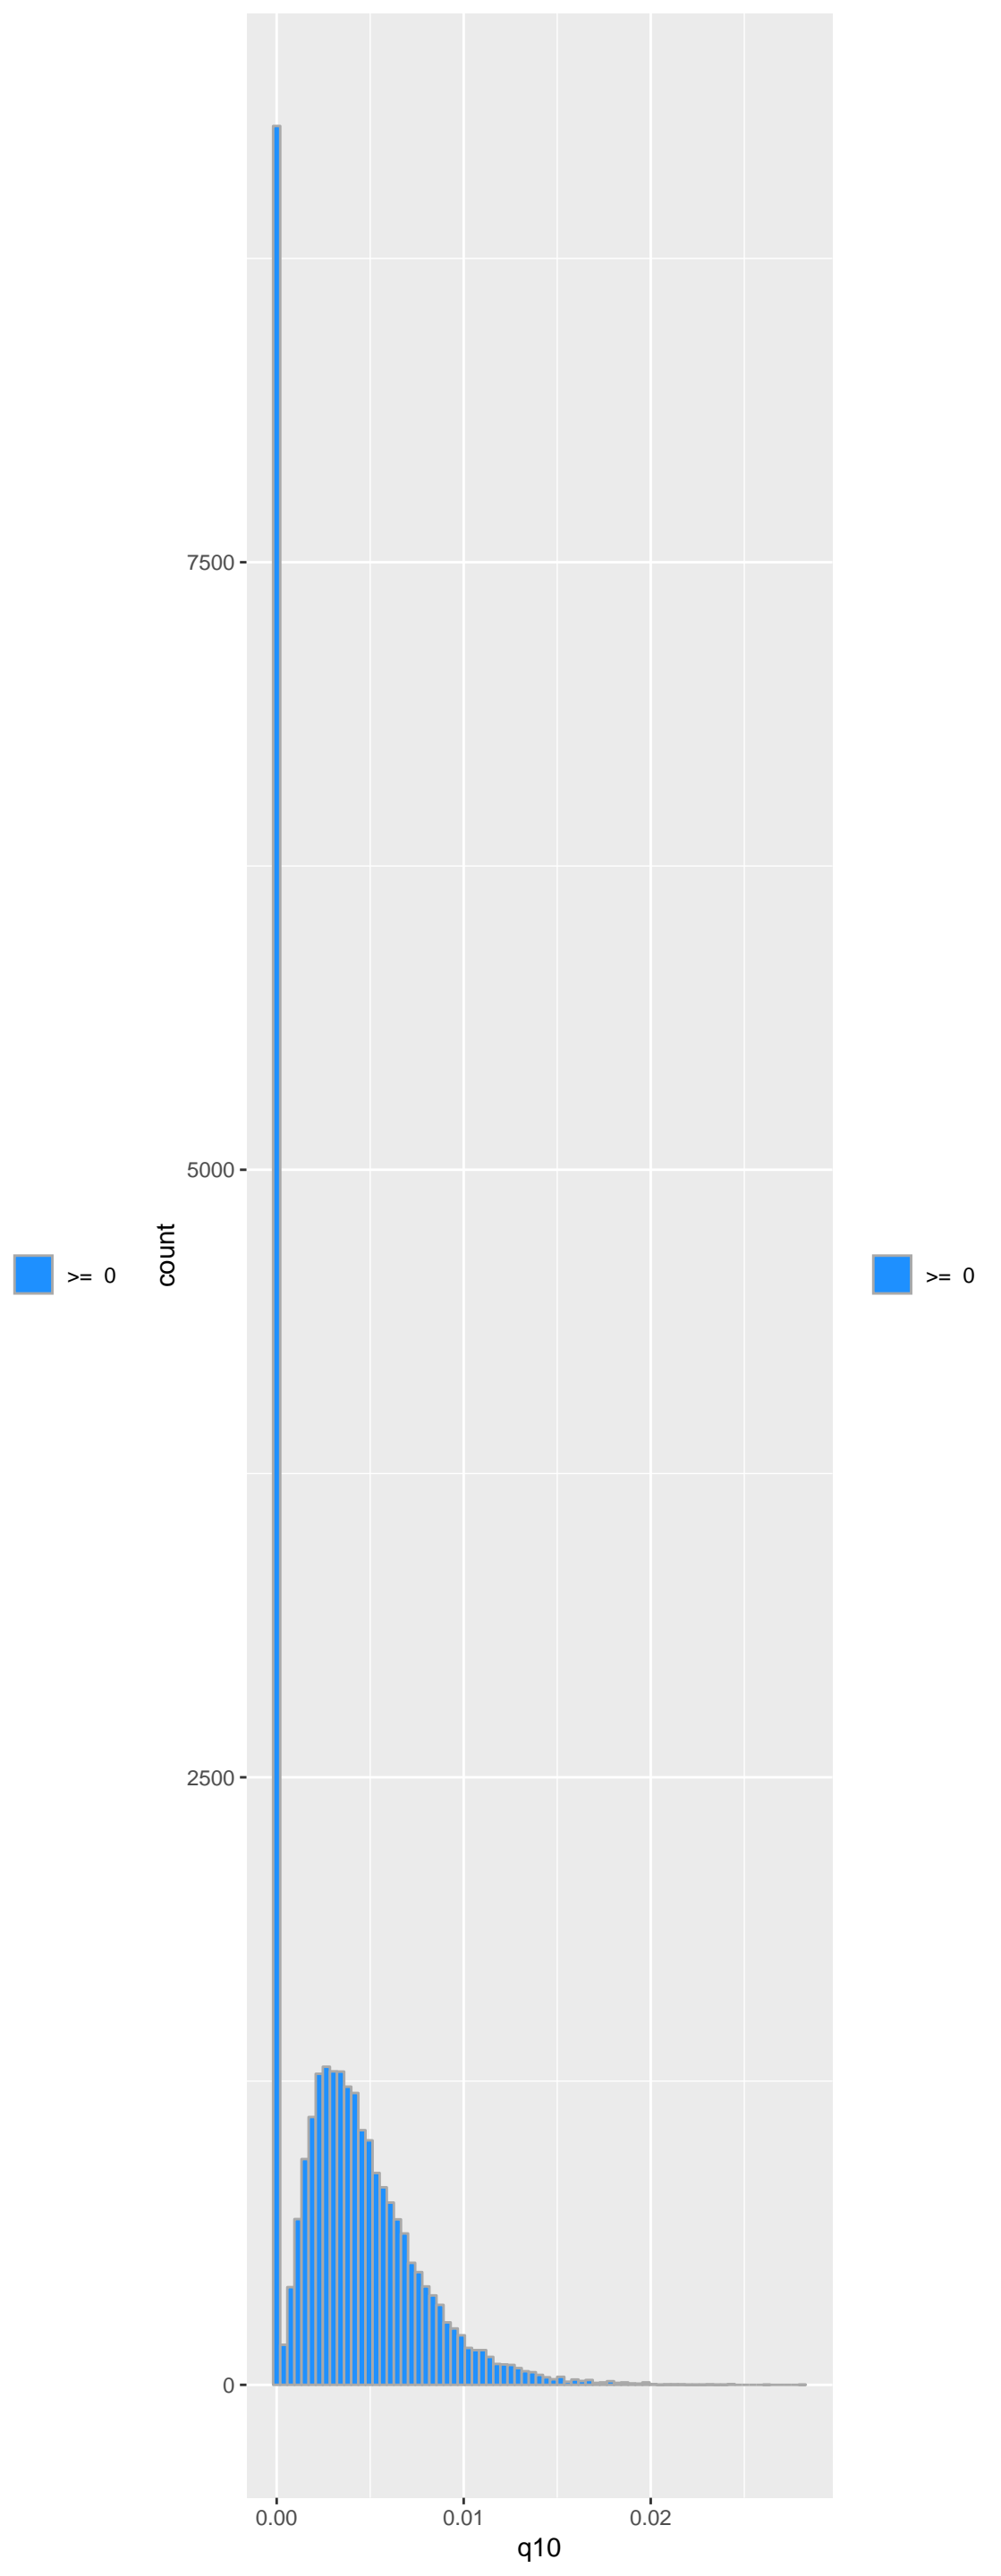



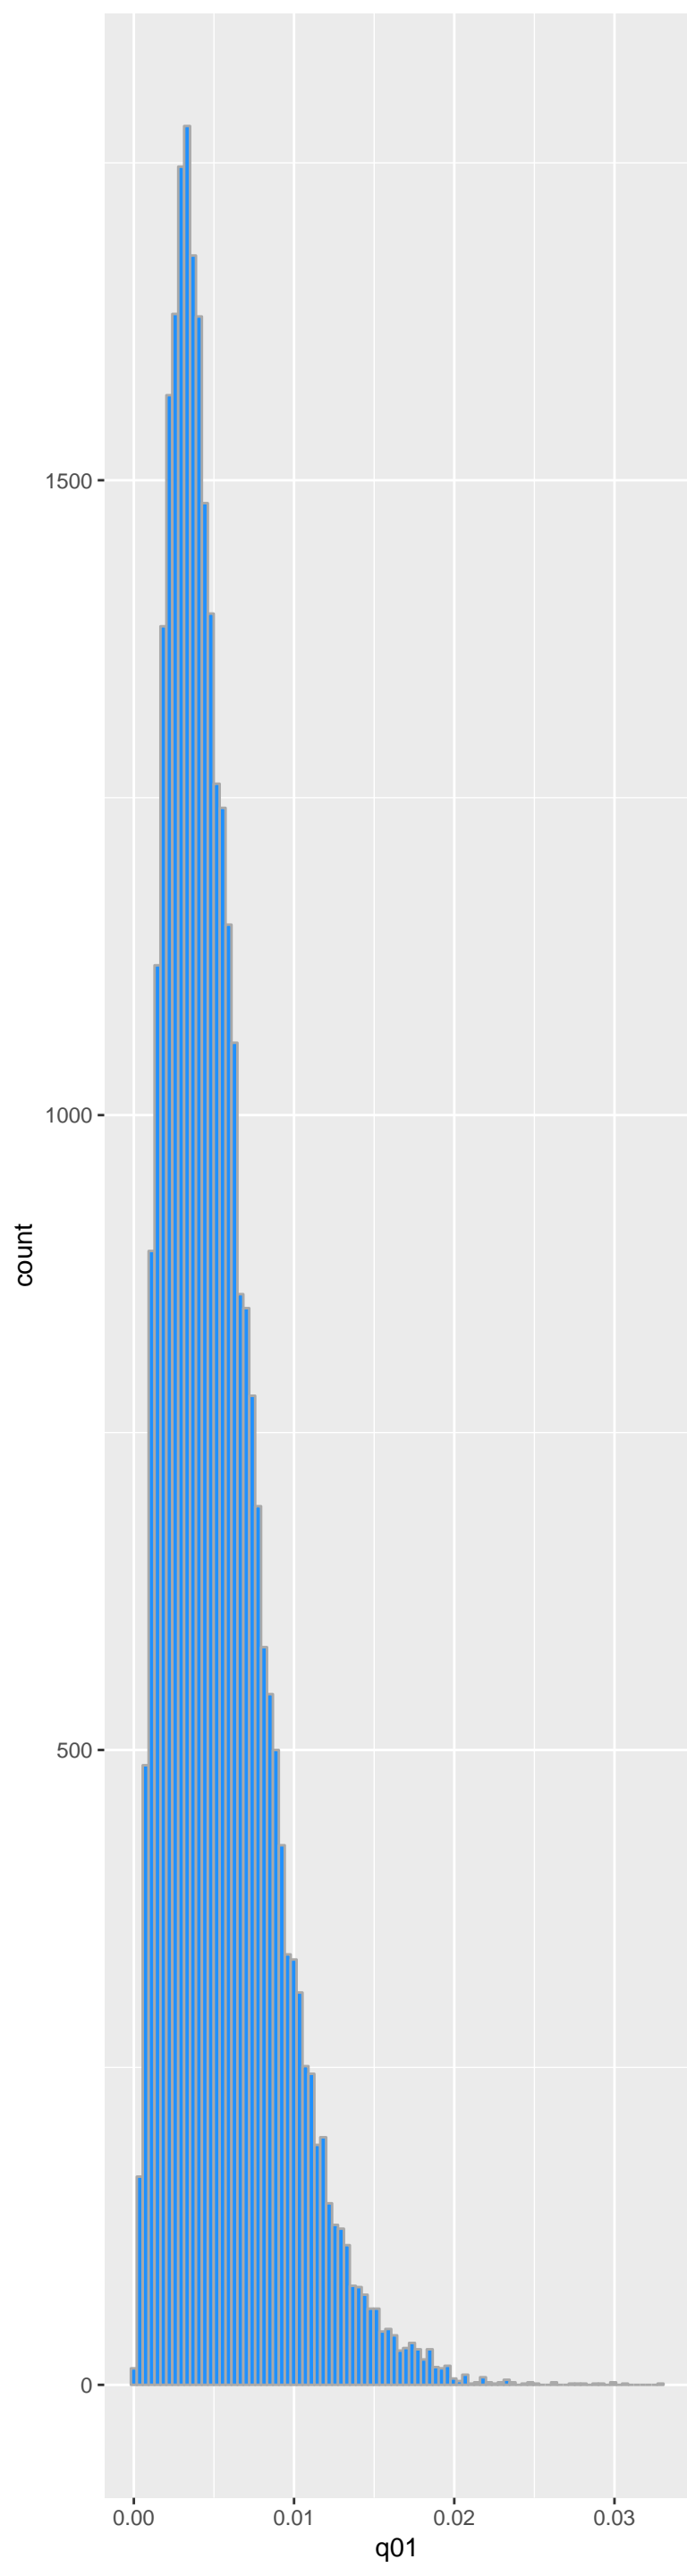

$y = 0$

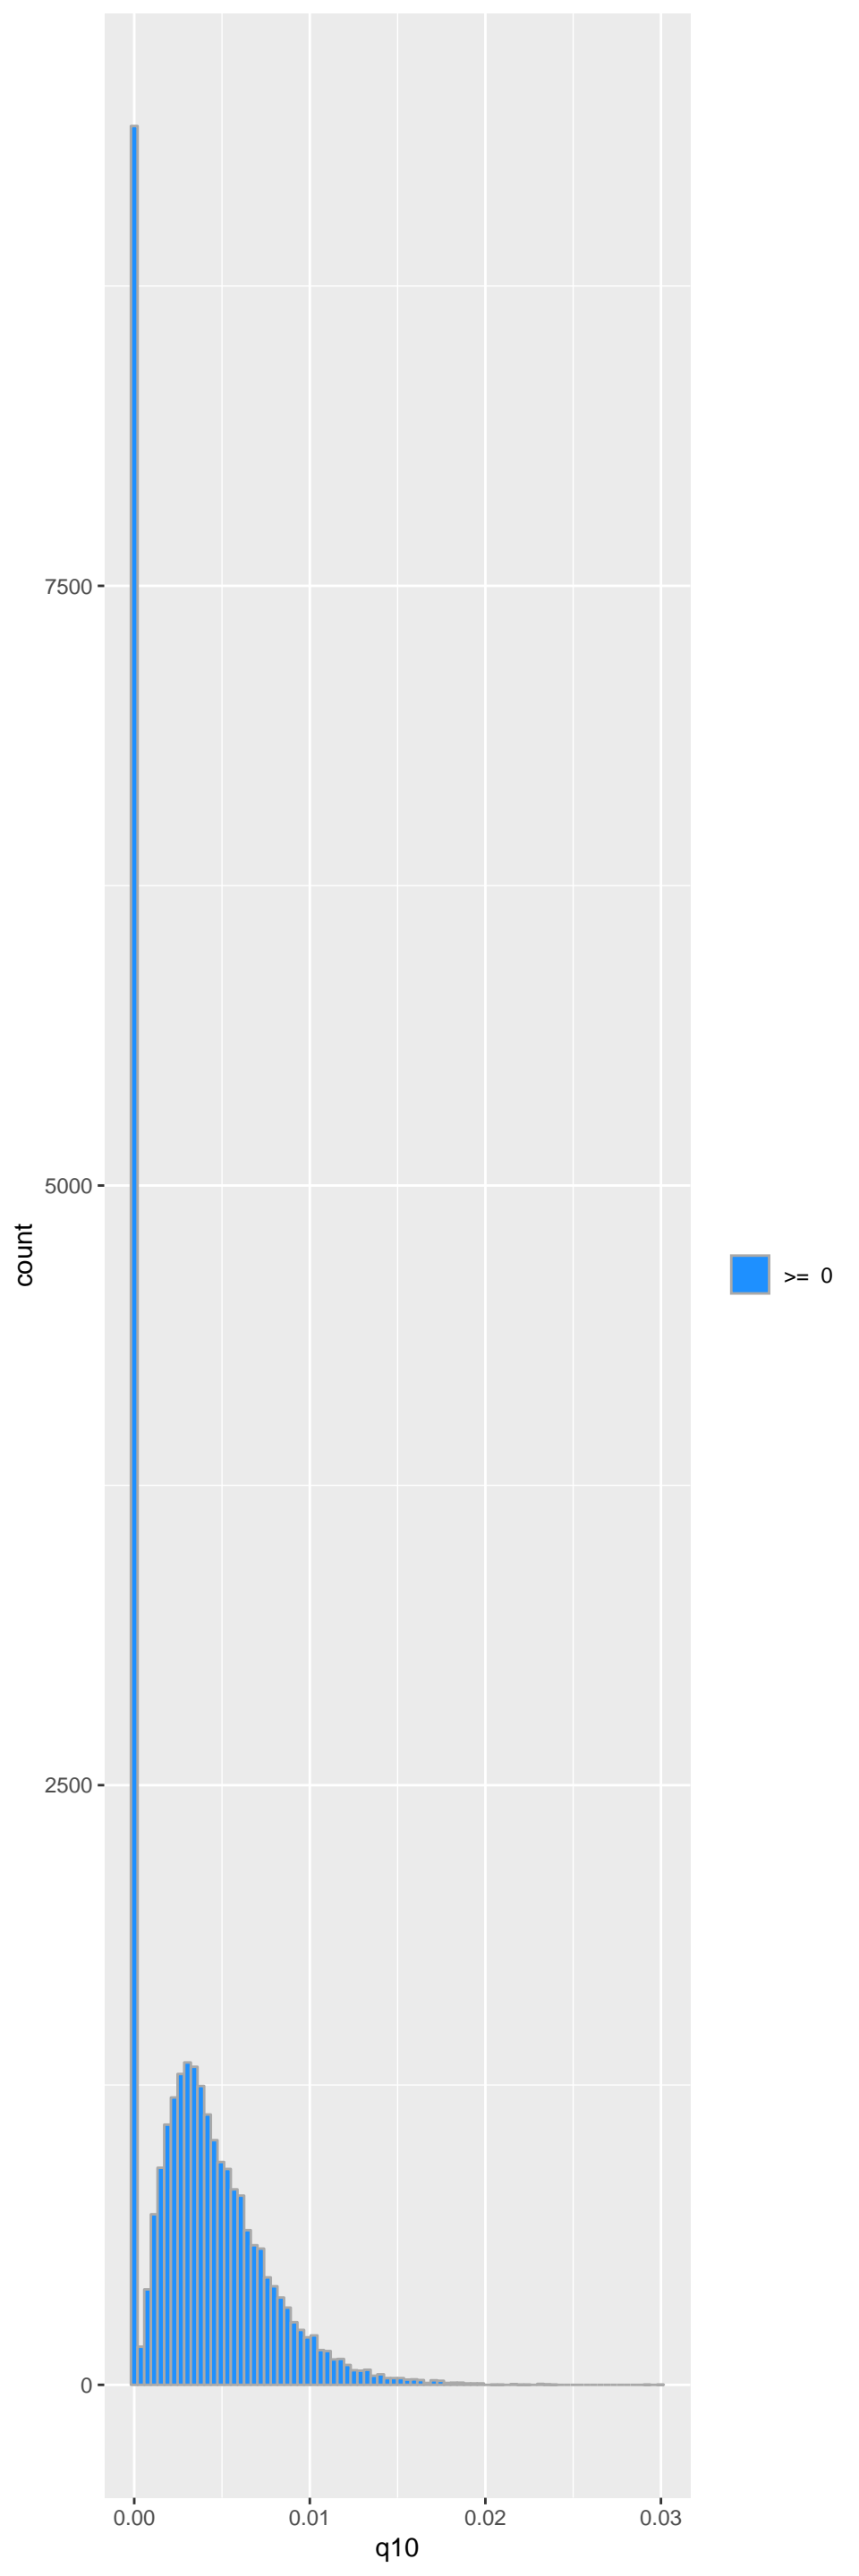

$y = 0$

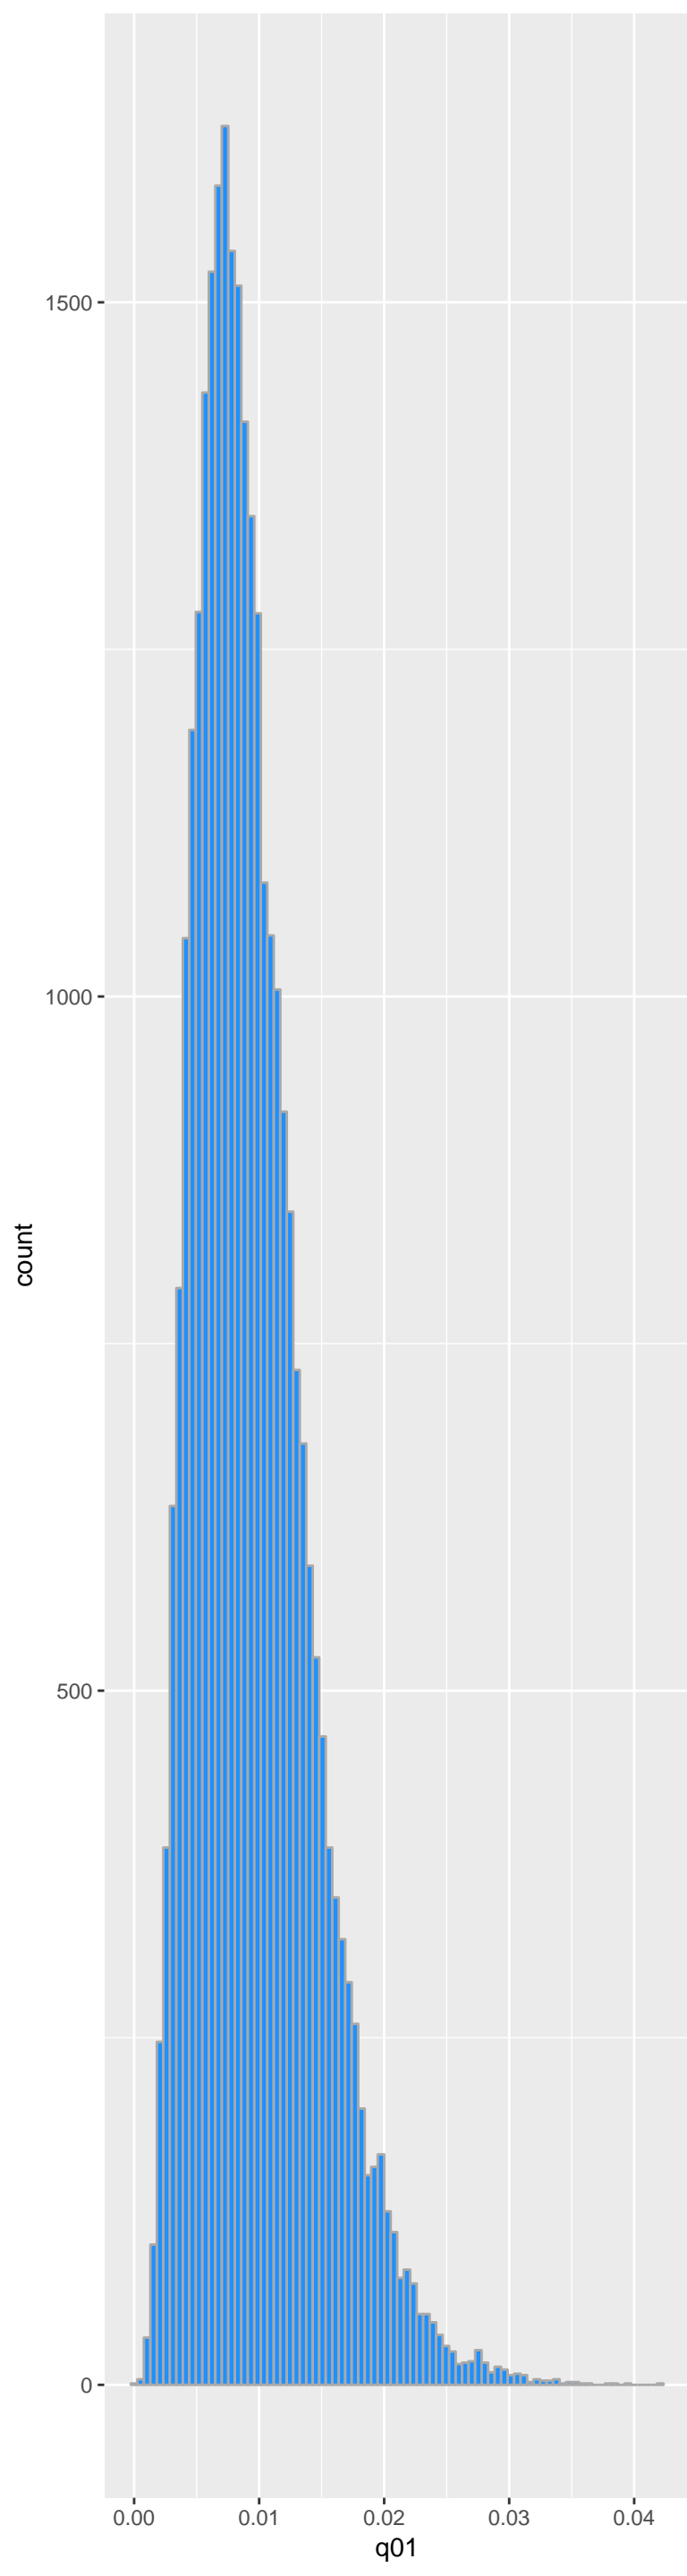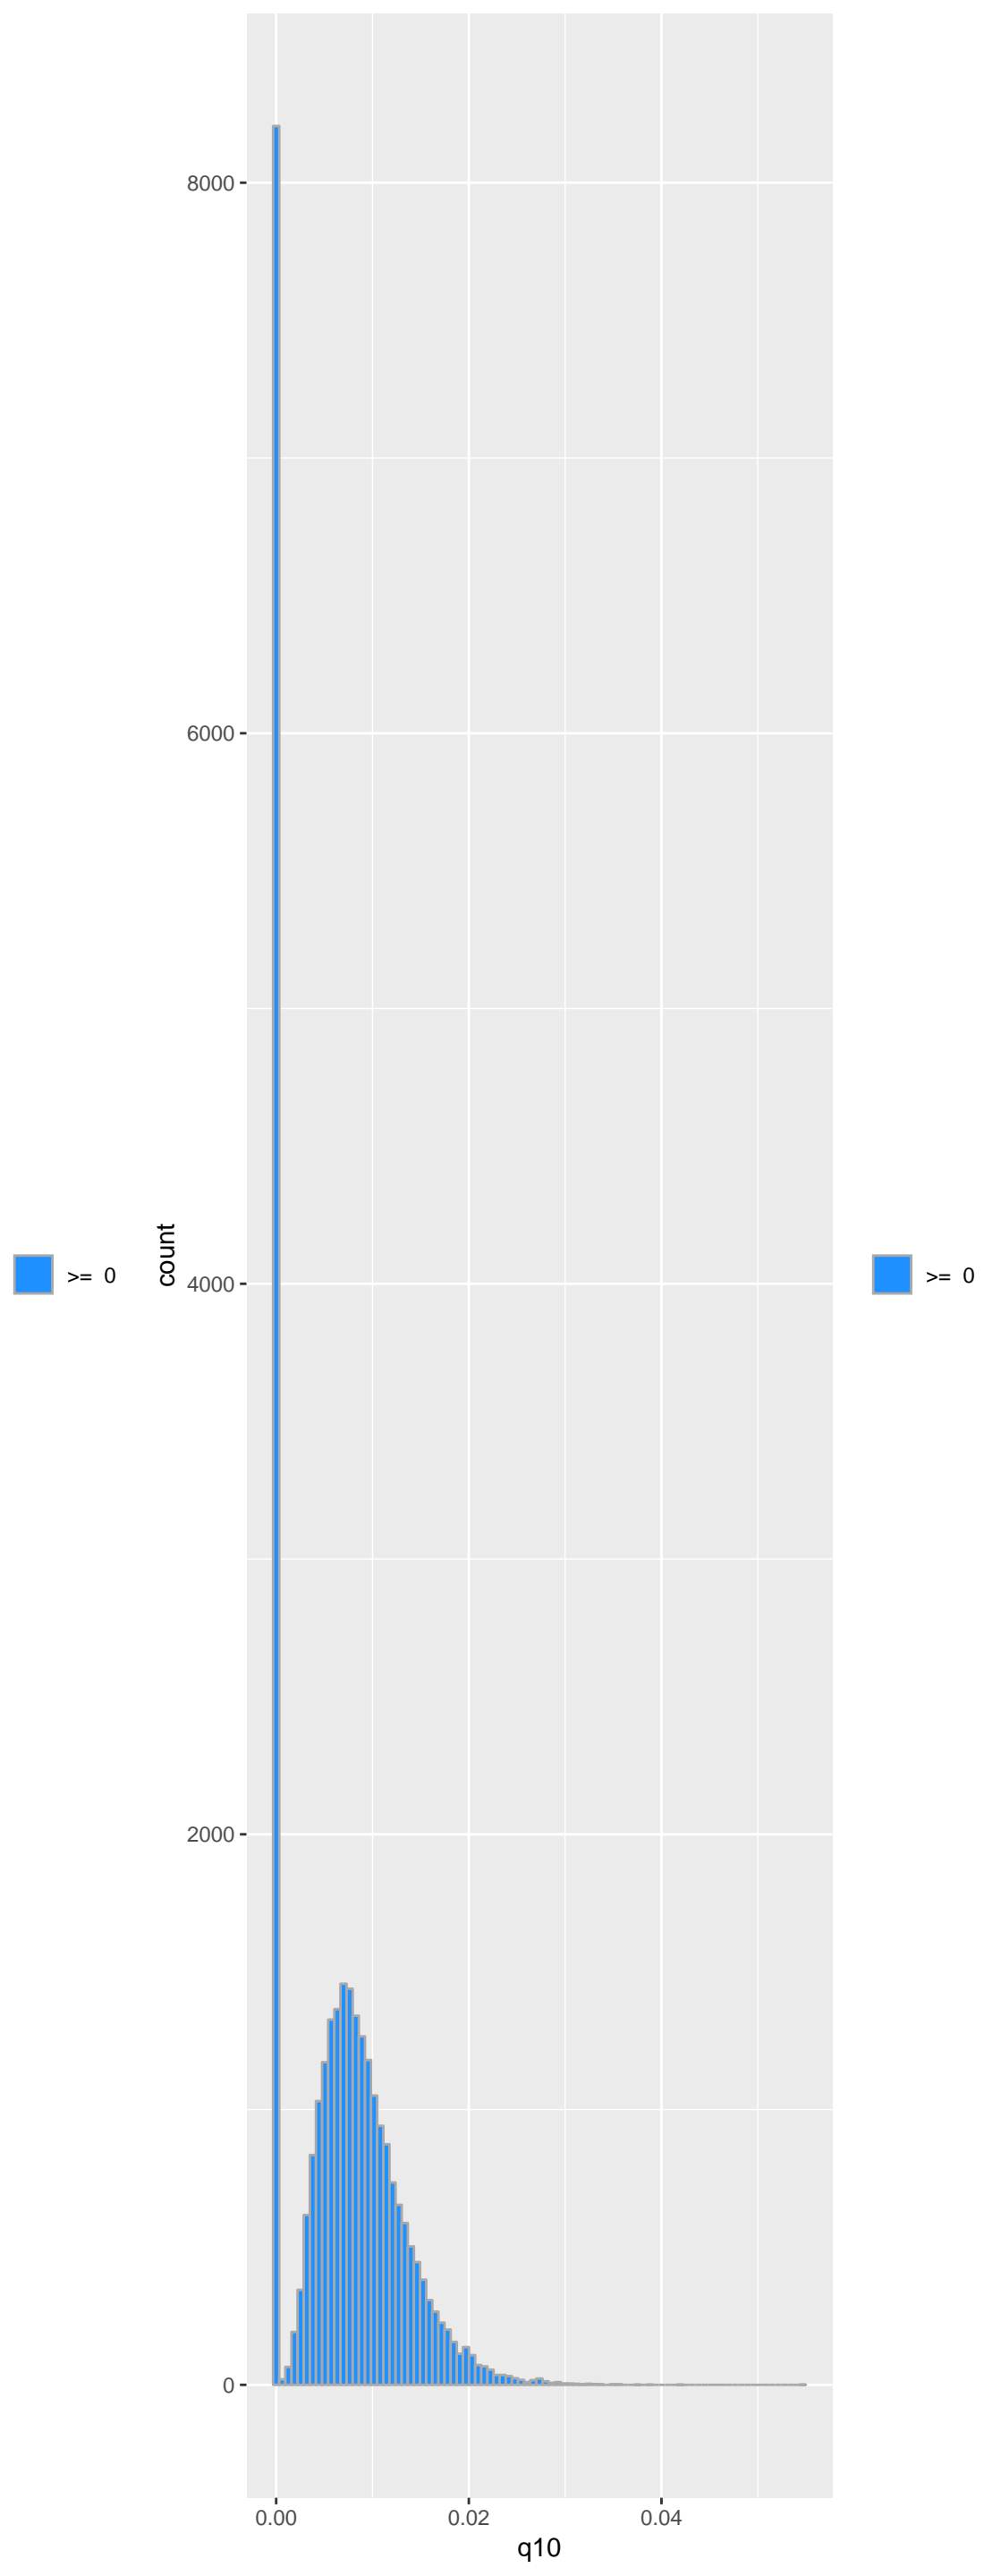

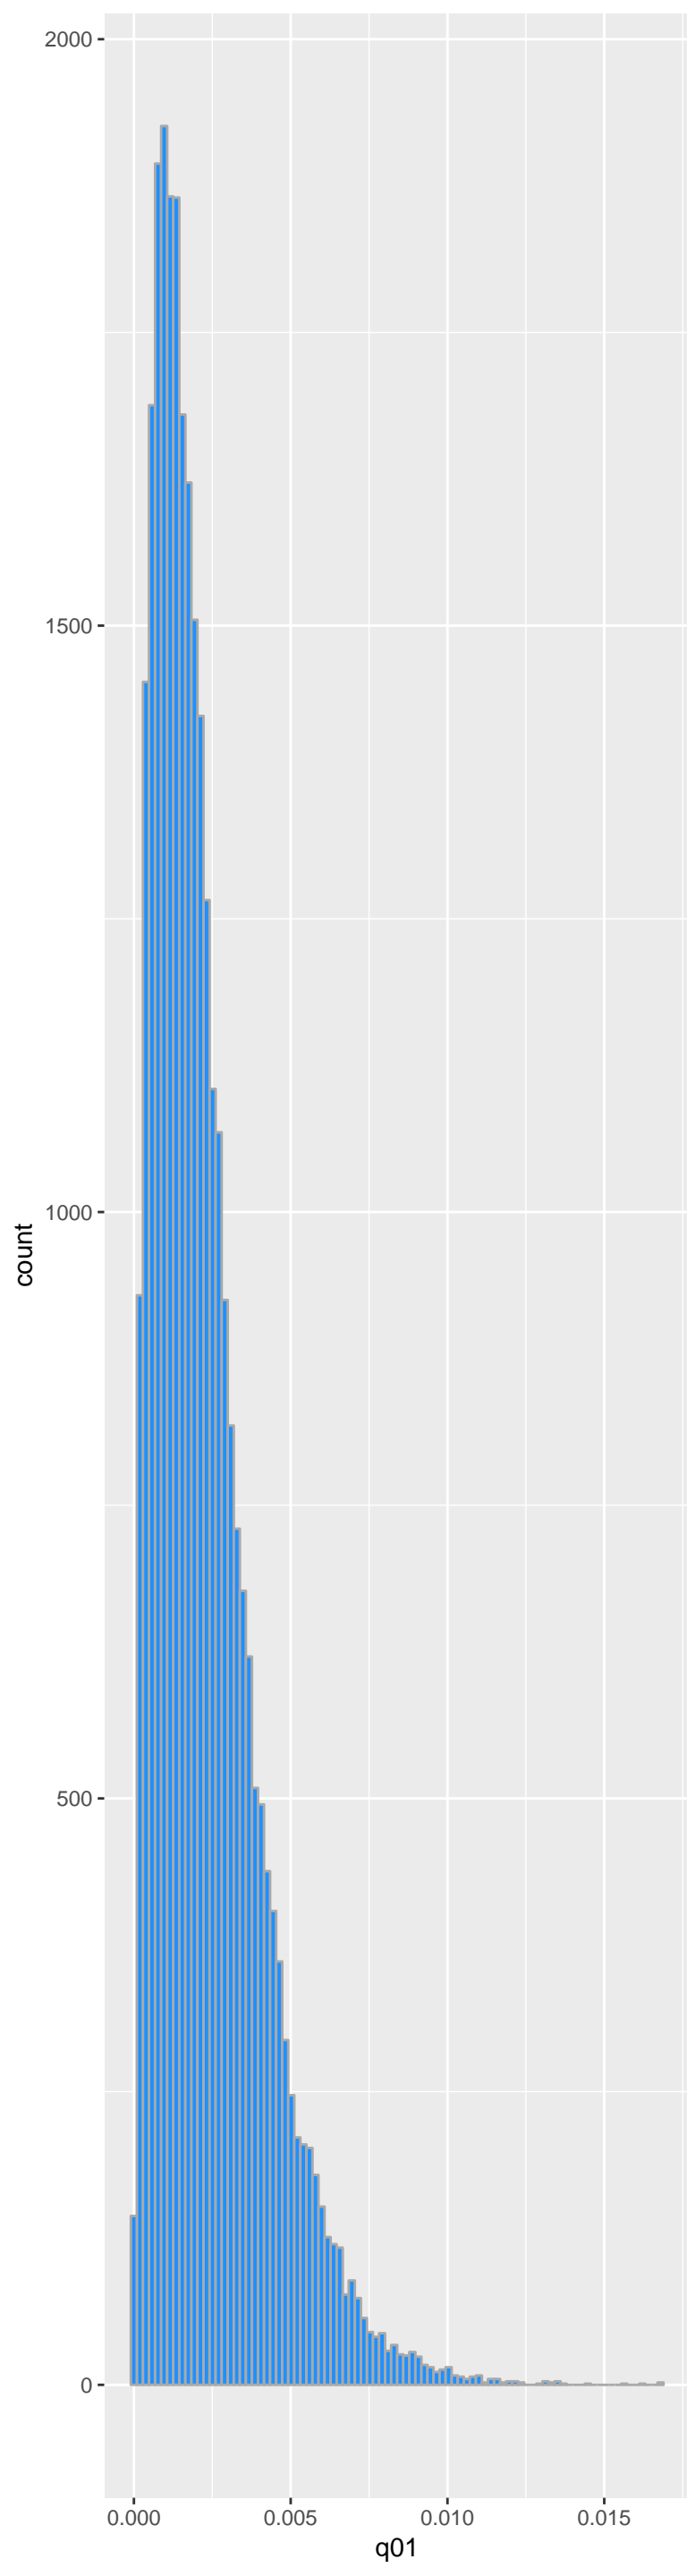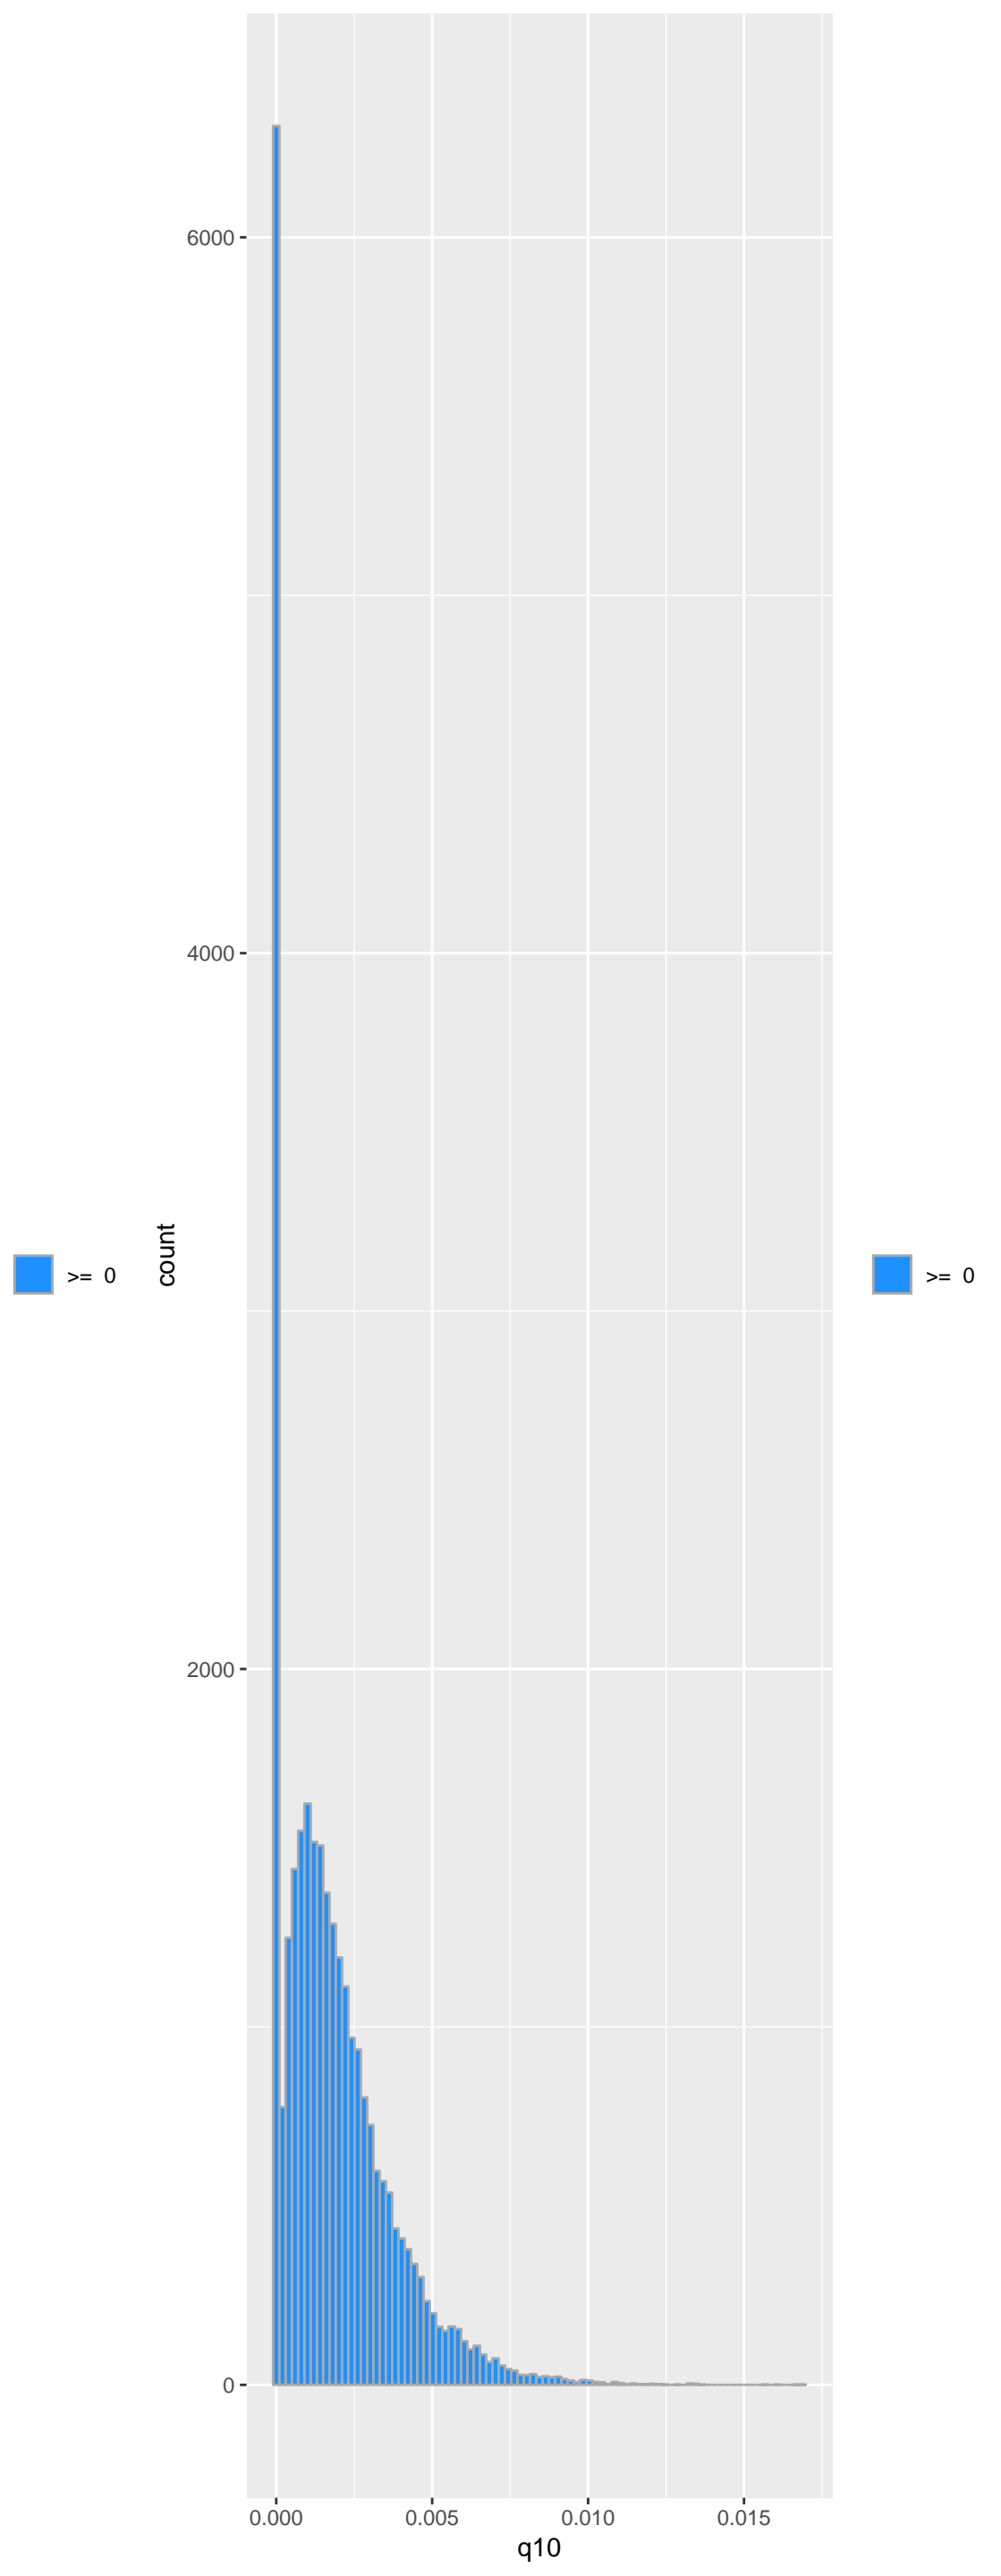

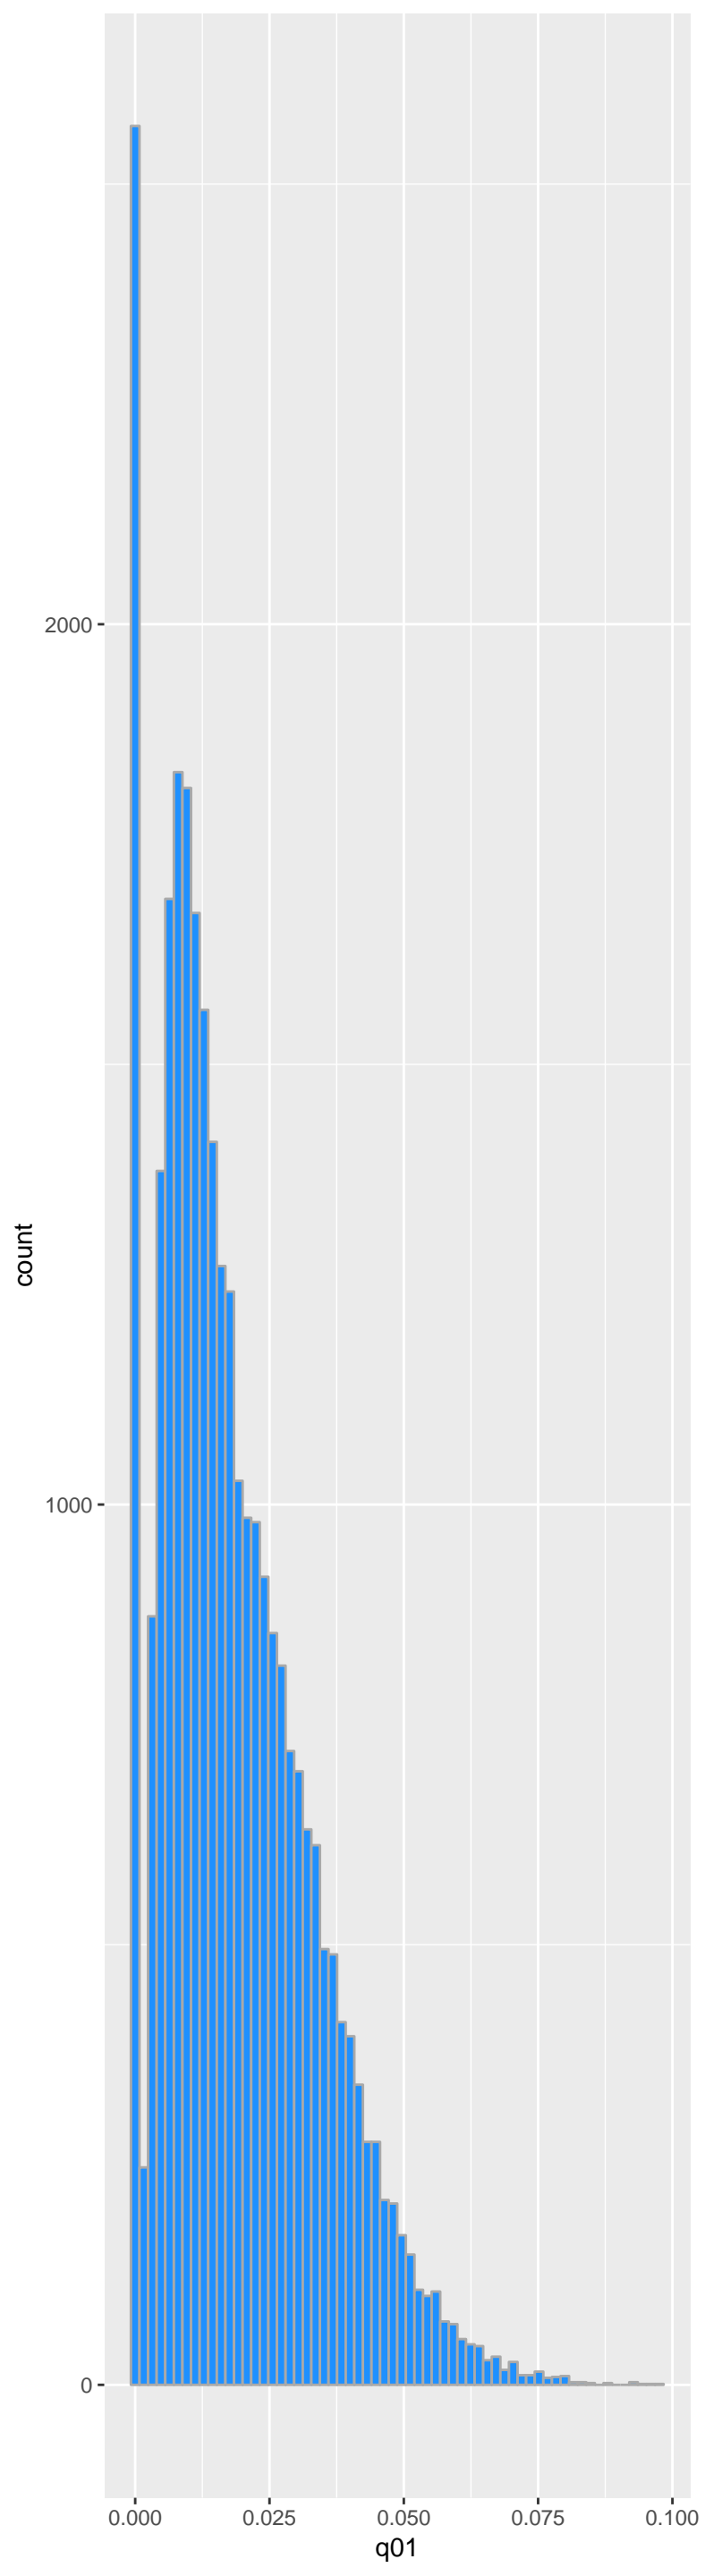

$y = 0$

$count$

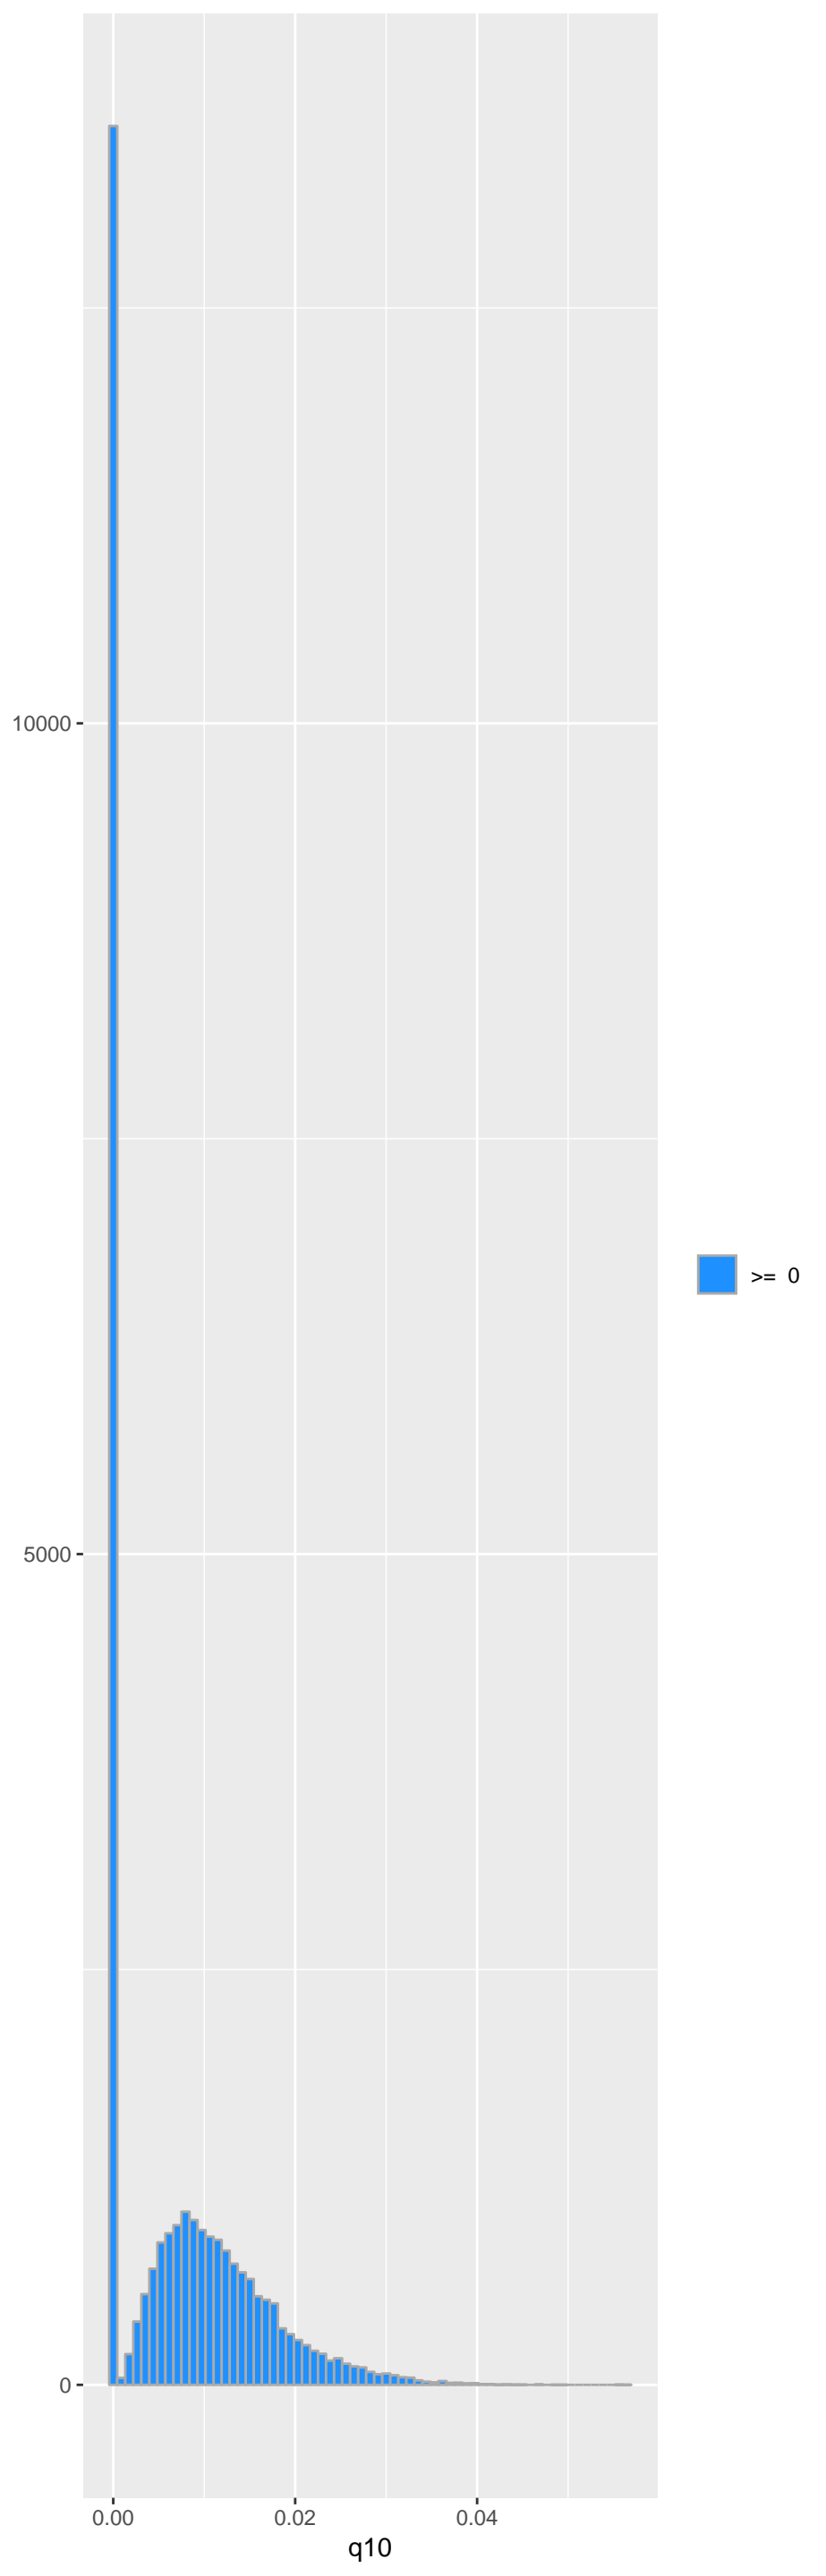

$y = 0$

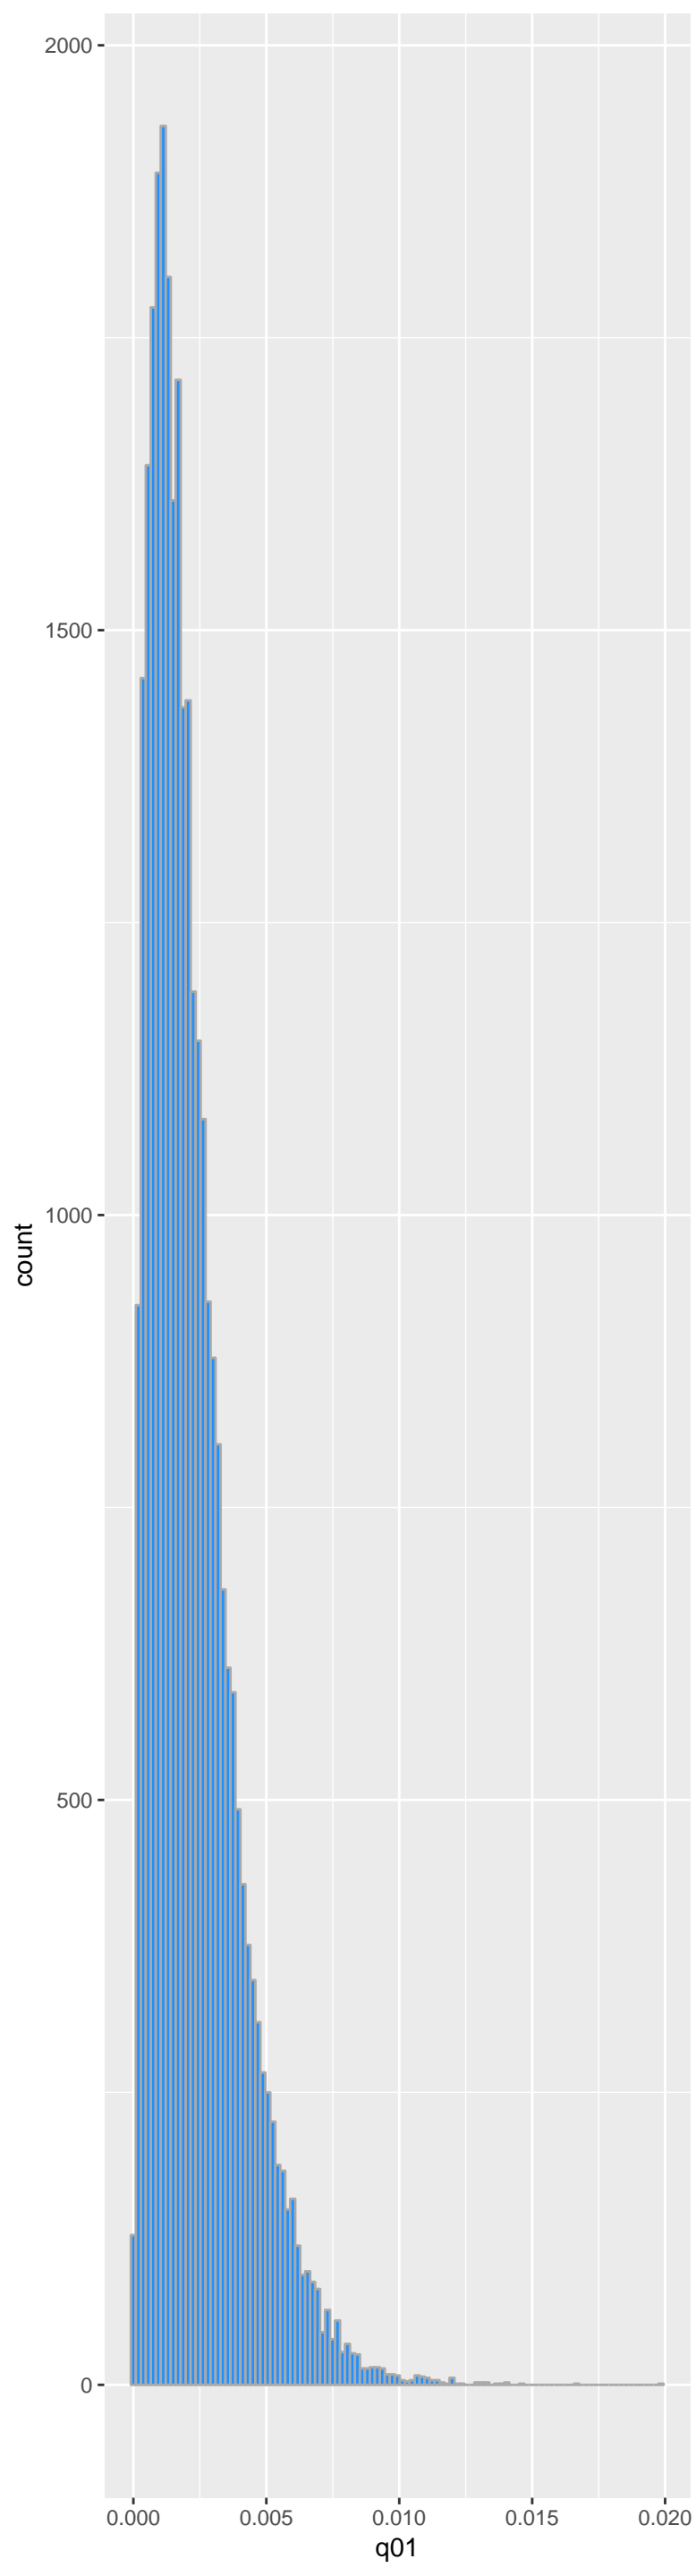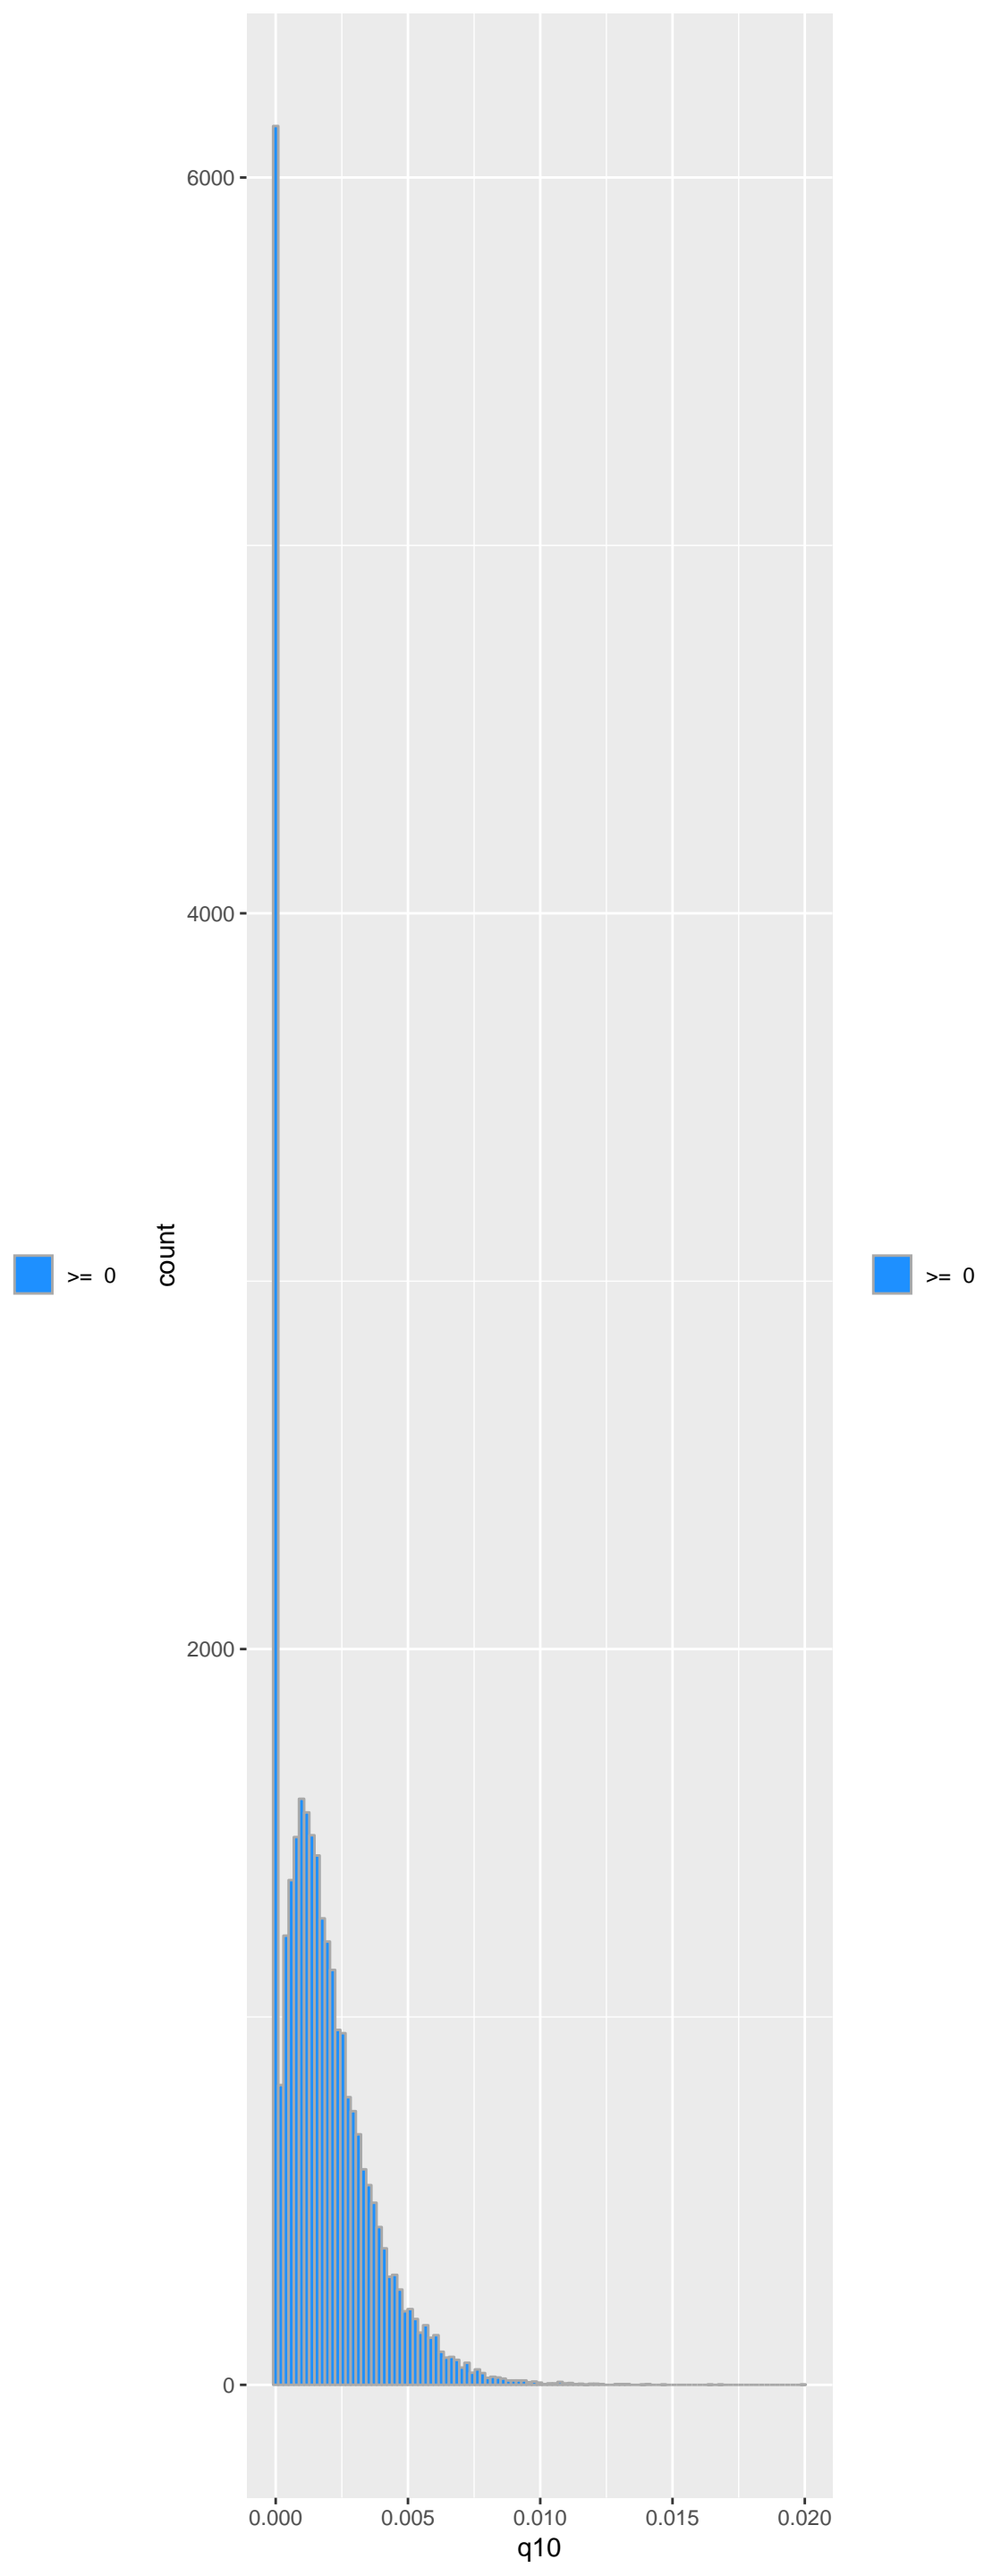

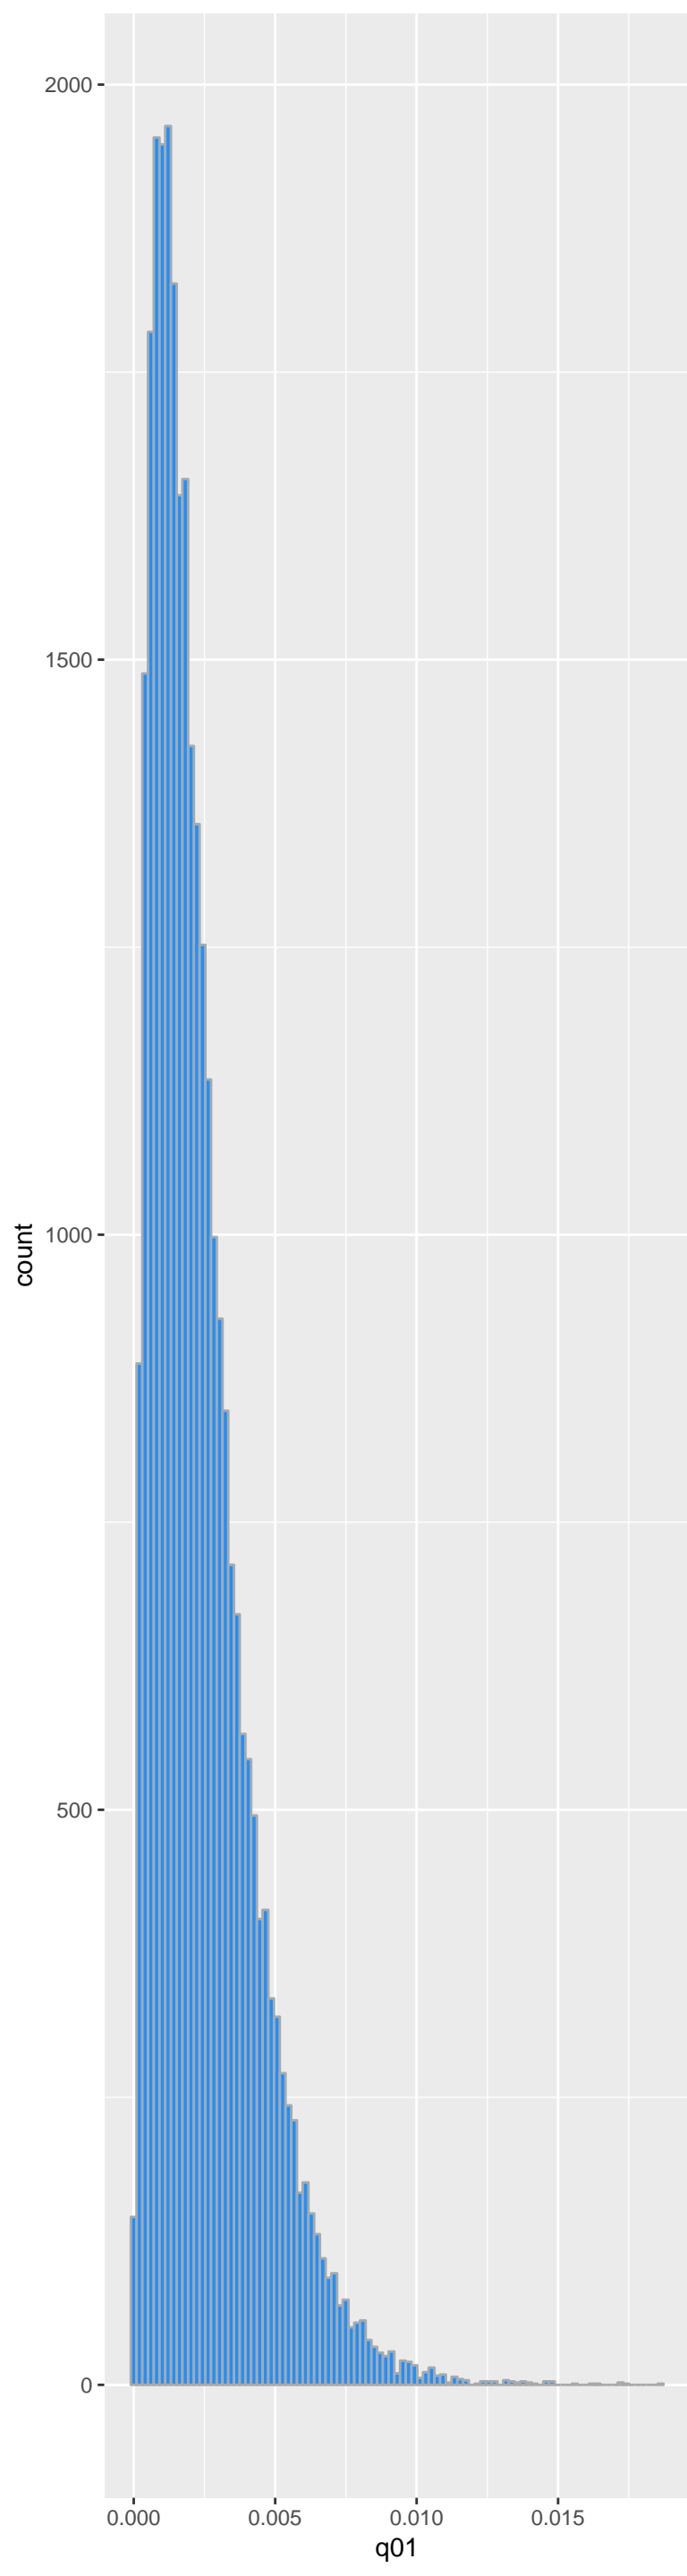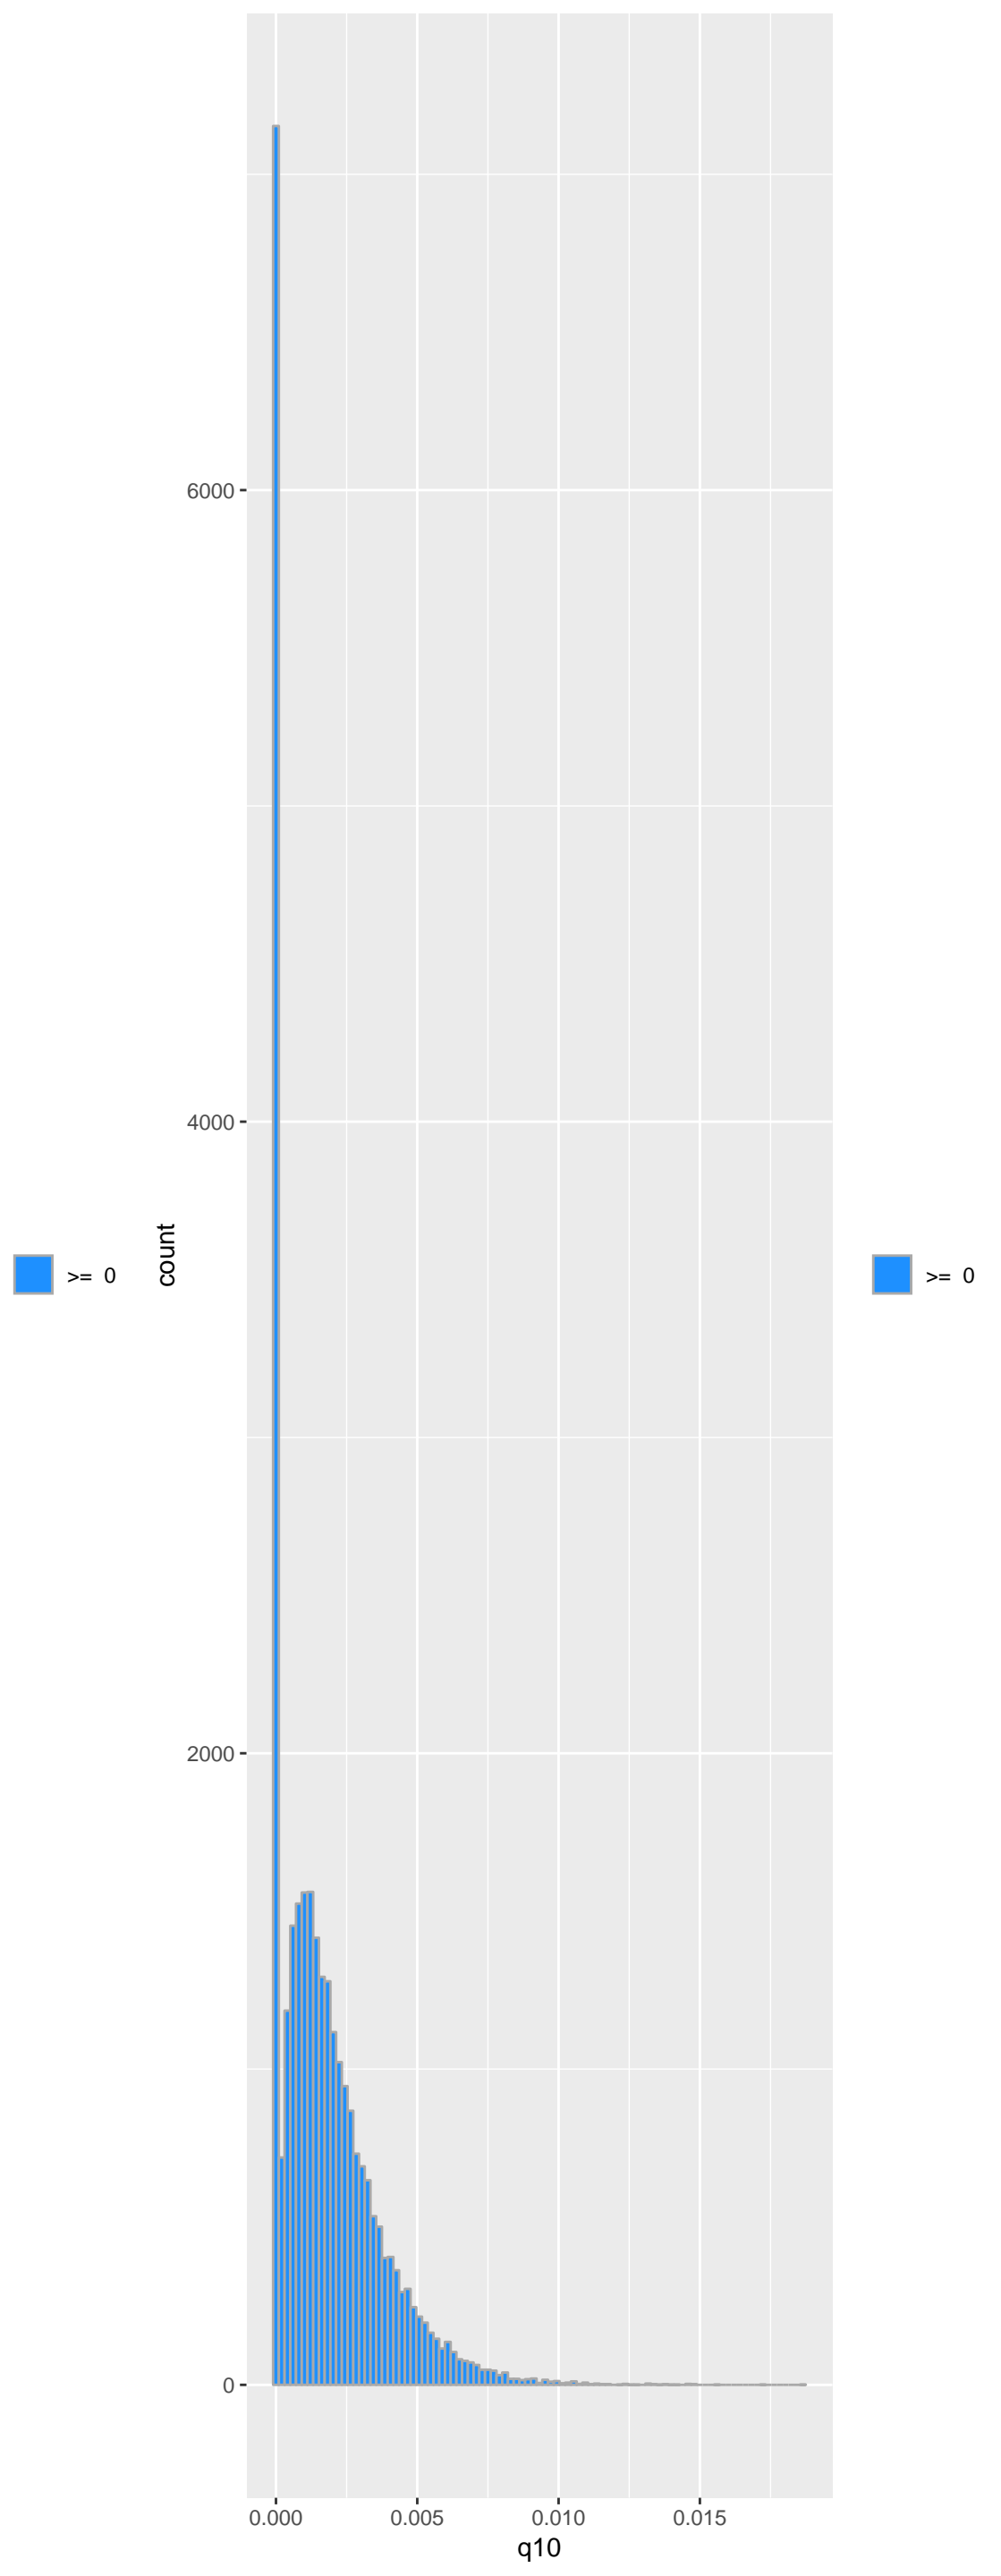

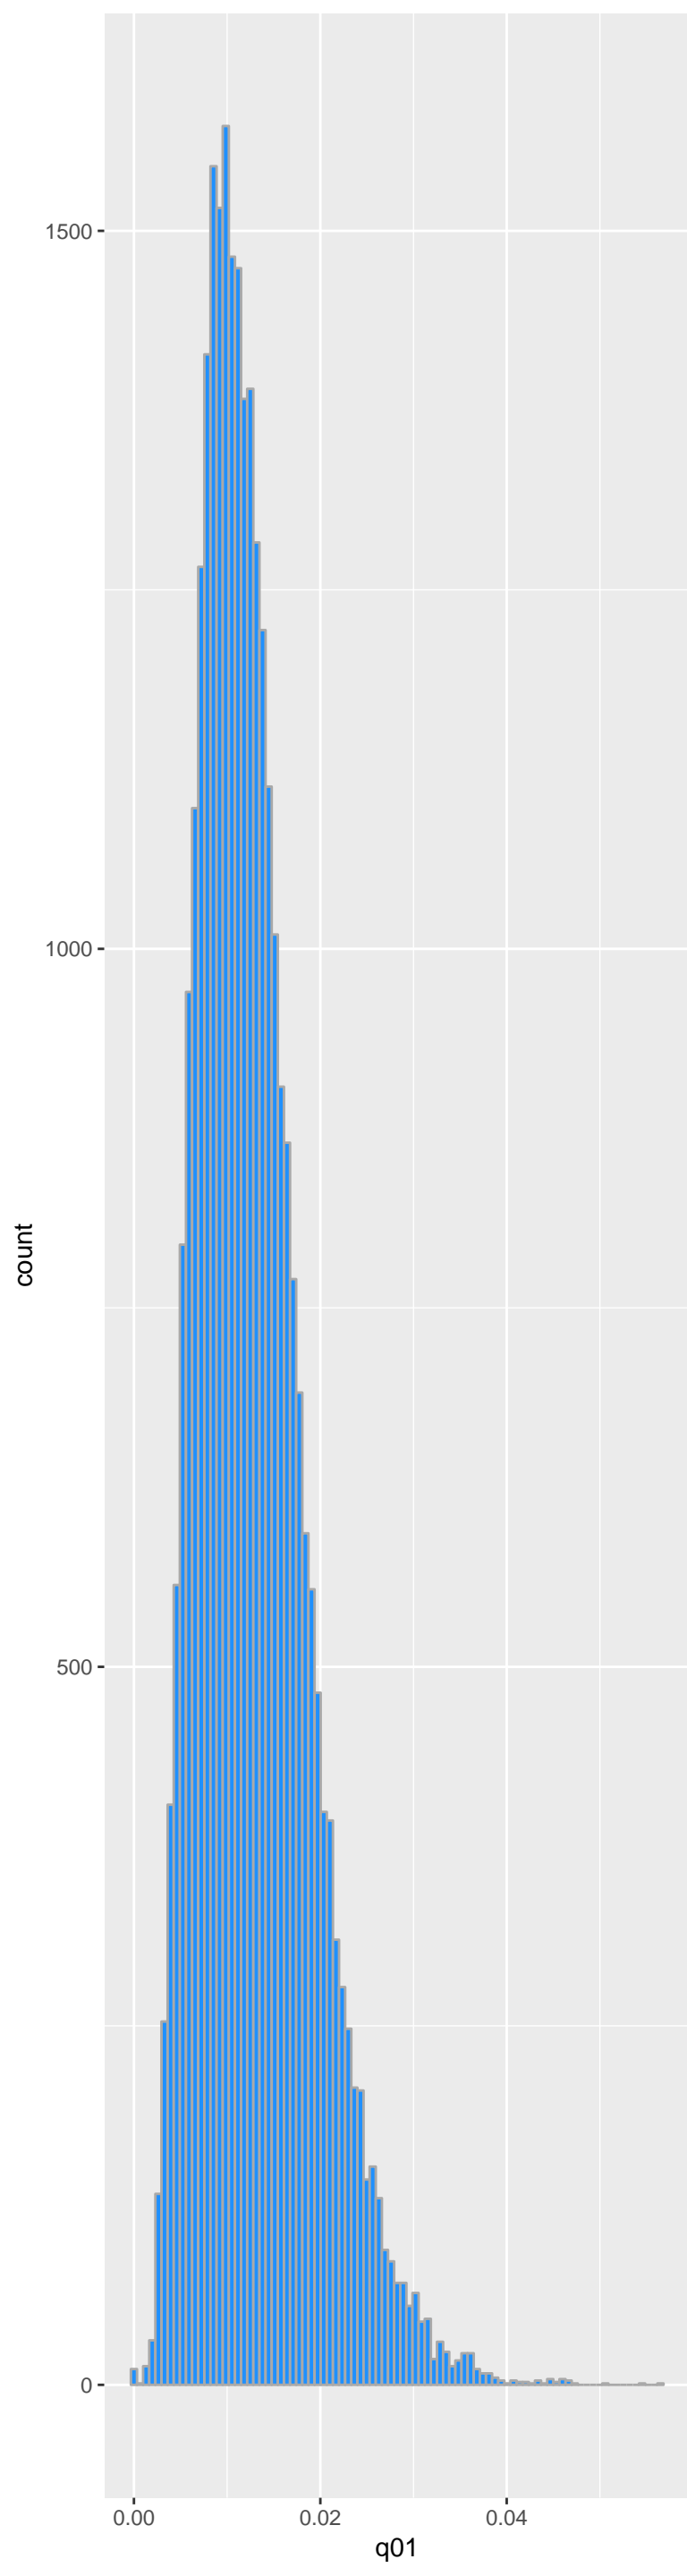

$y = 0$

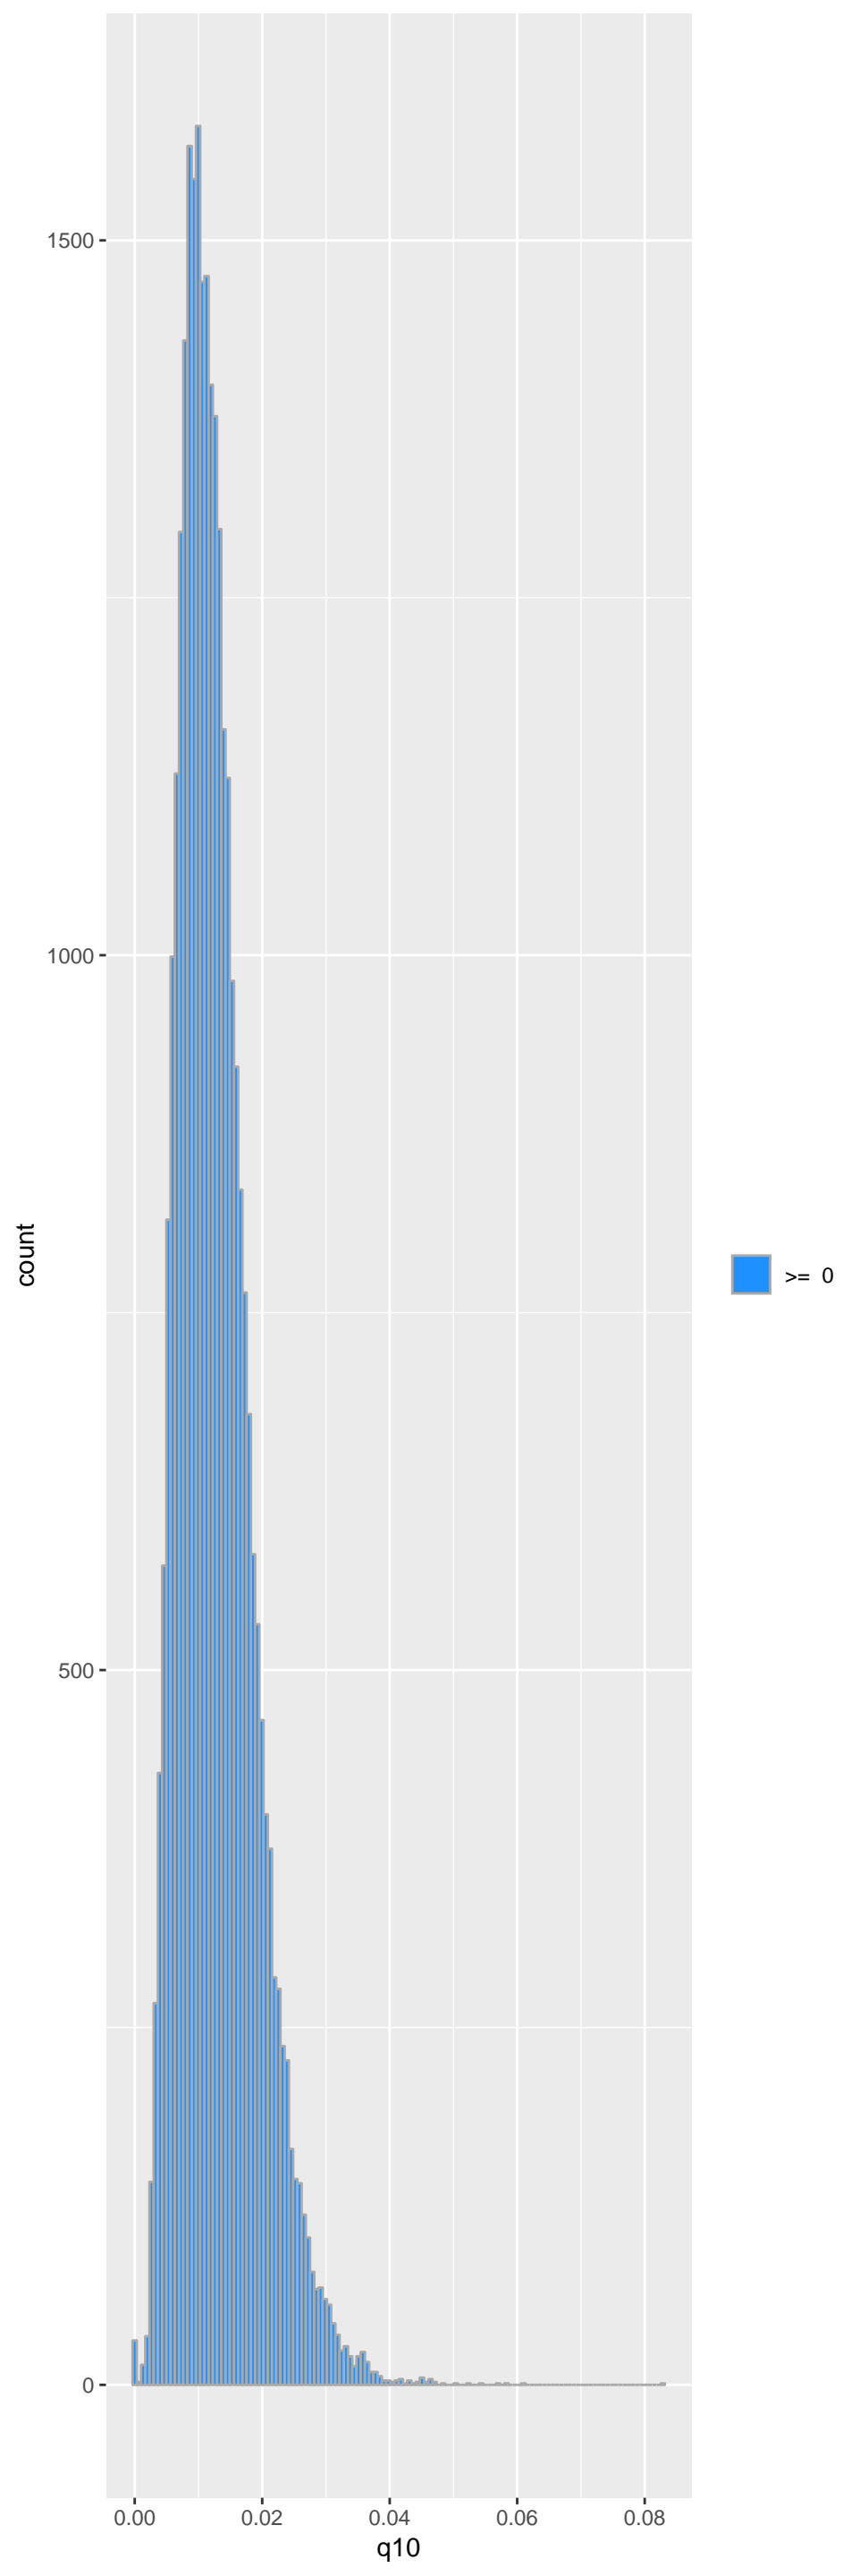

$y = 0$

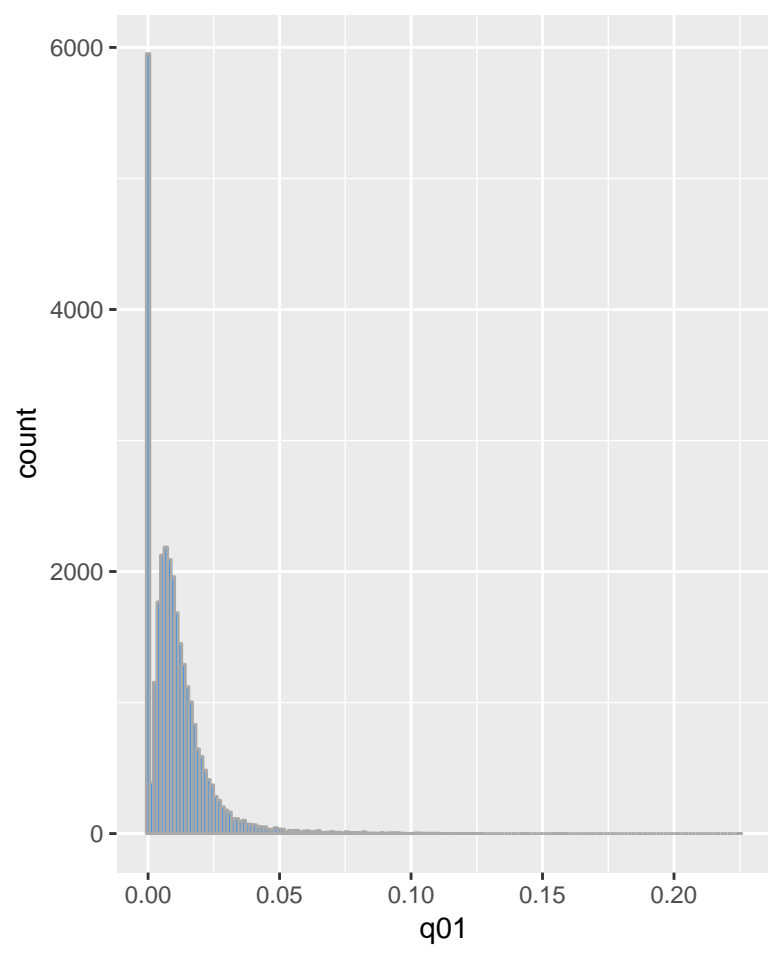

  $\geq 0$

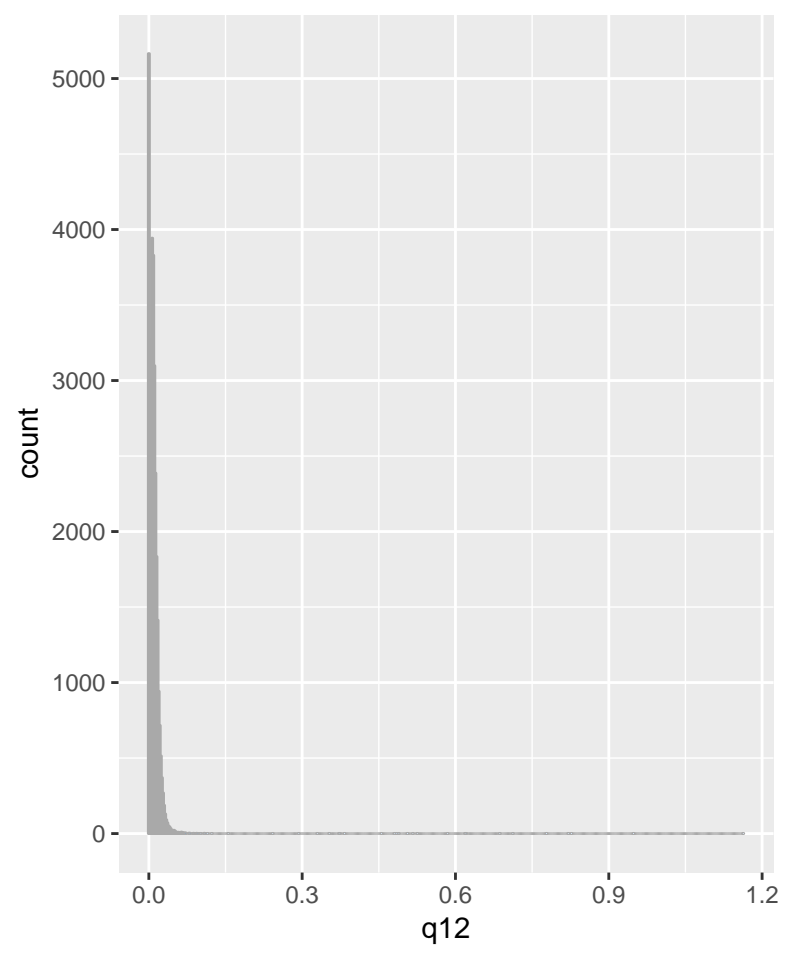

  $\geq 0$

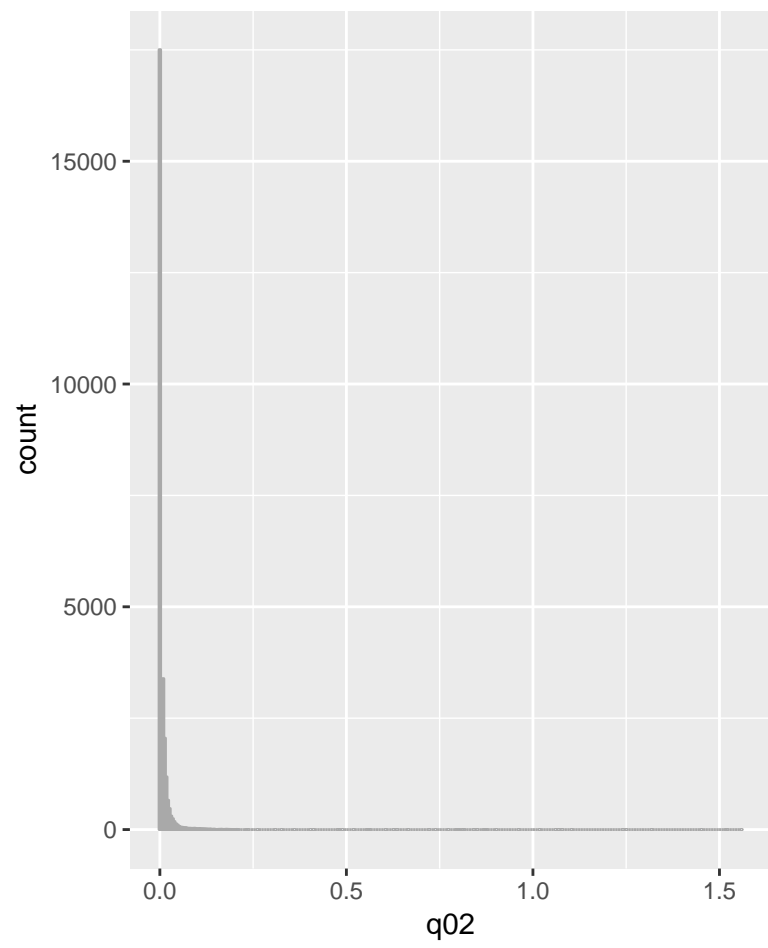

  $\geq 0$

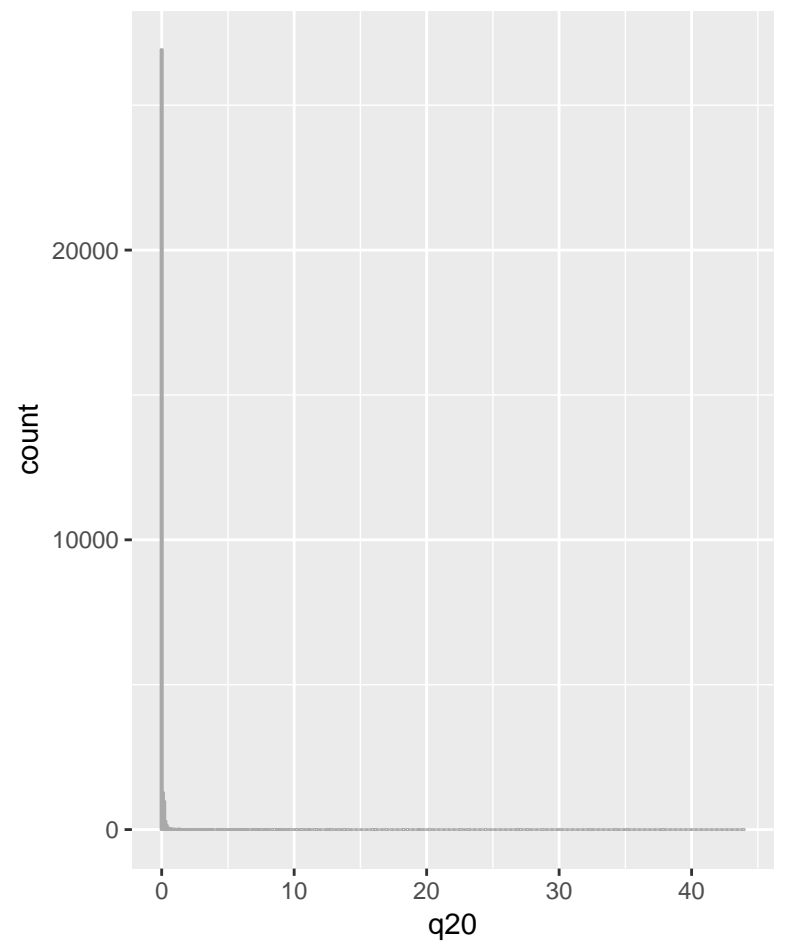

  $\geq 0$

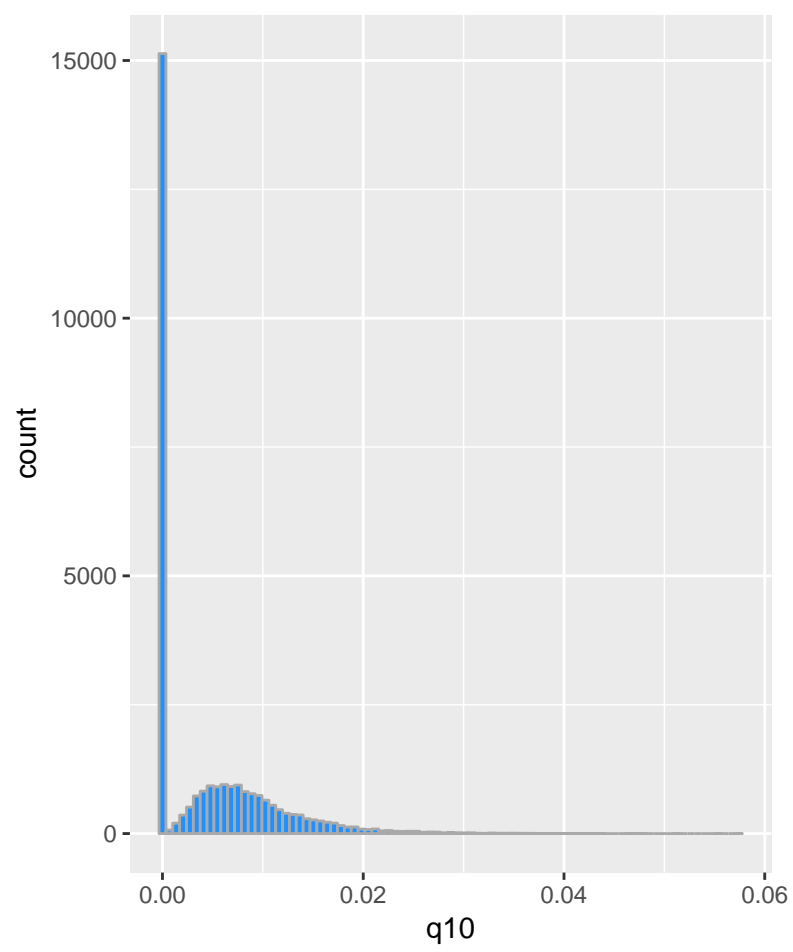

  $\geq 0$

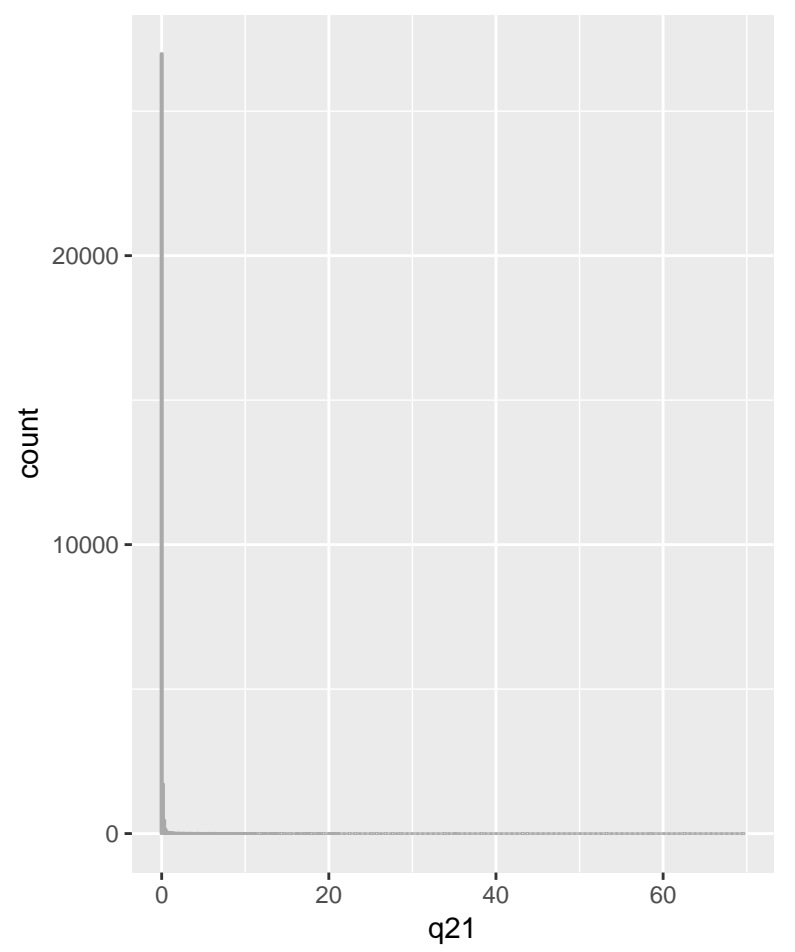

  $\geq 0$



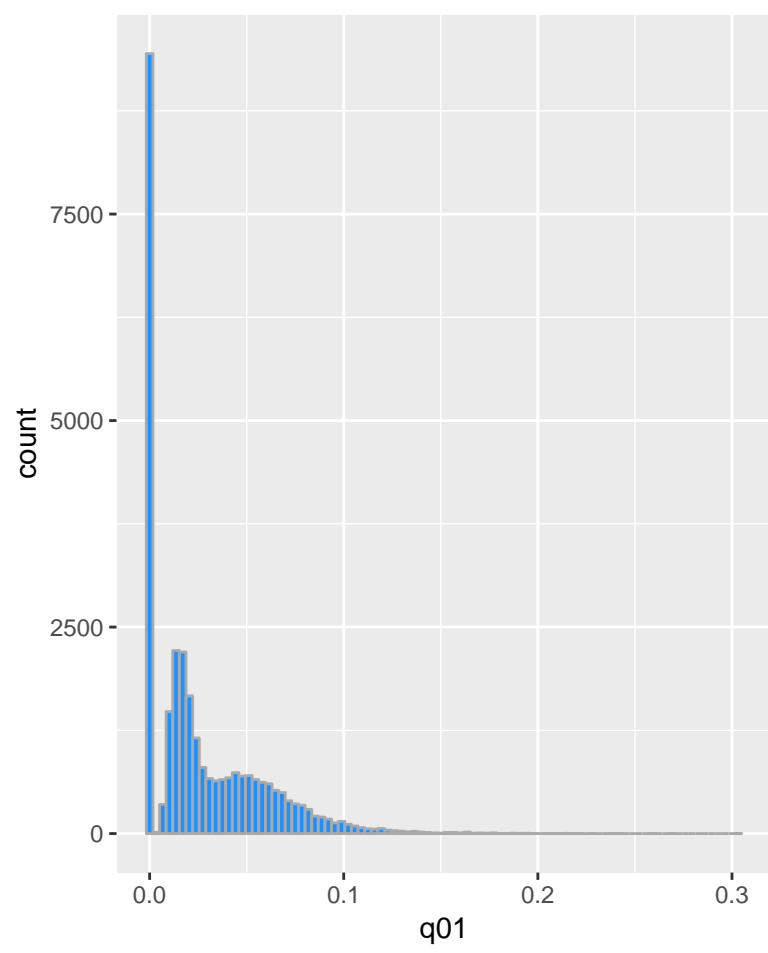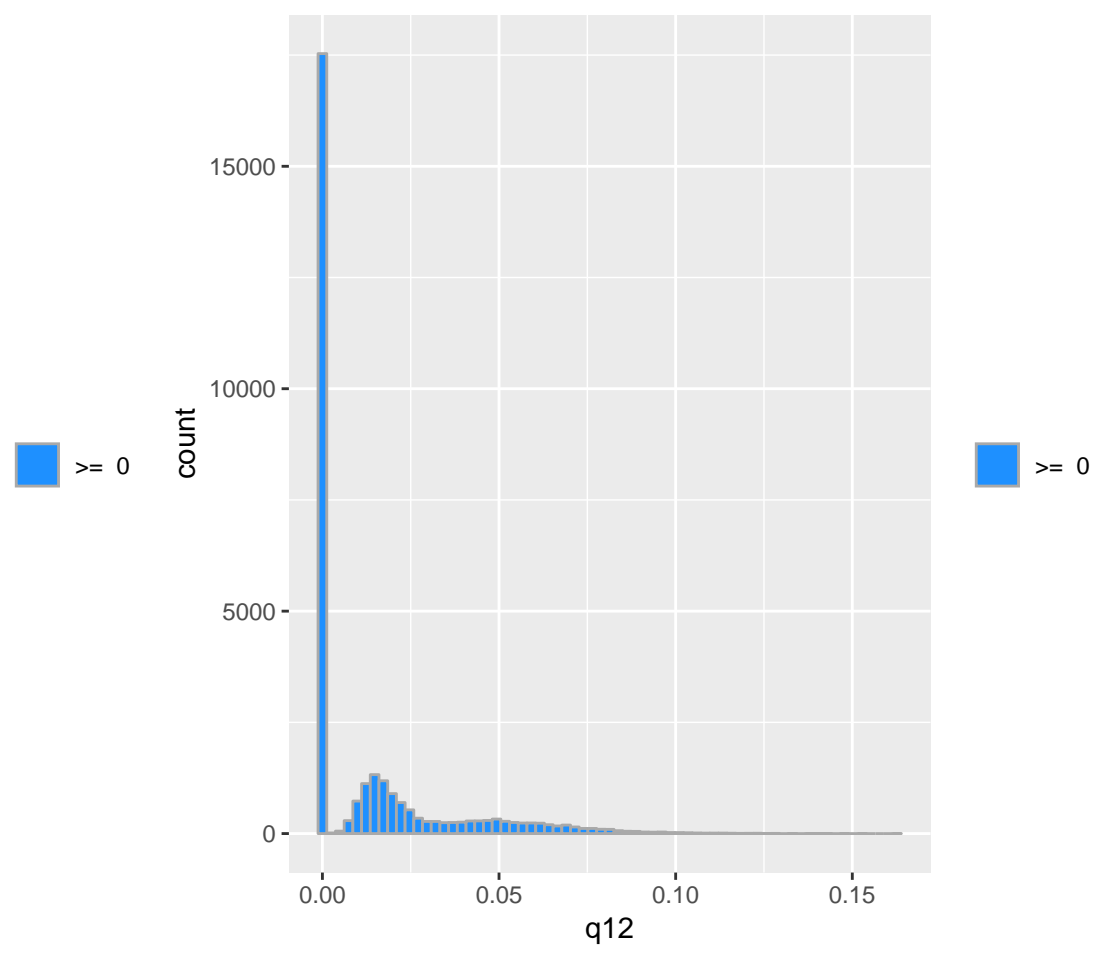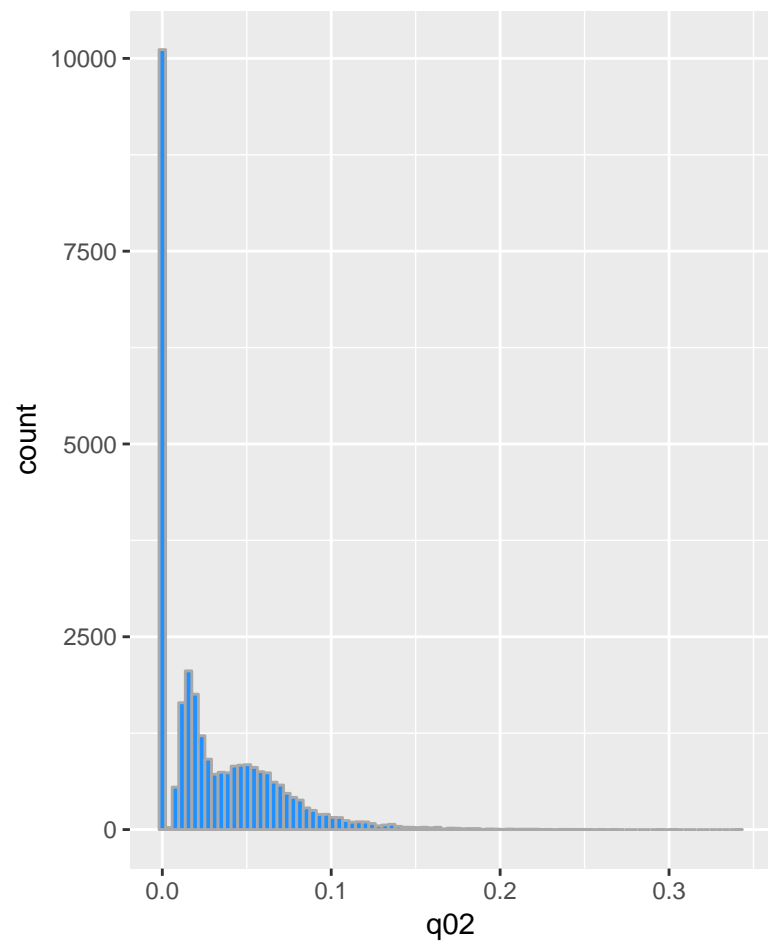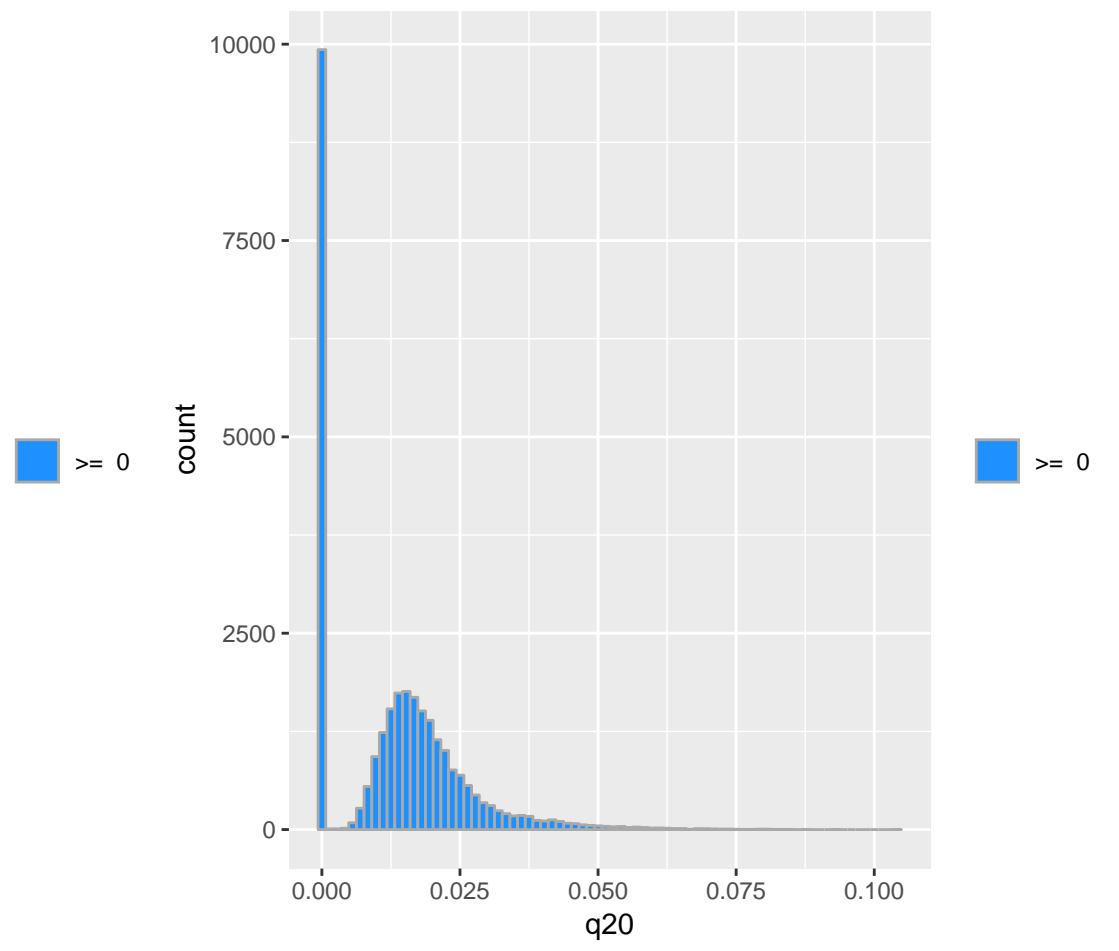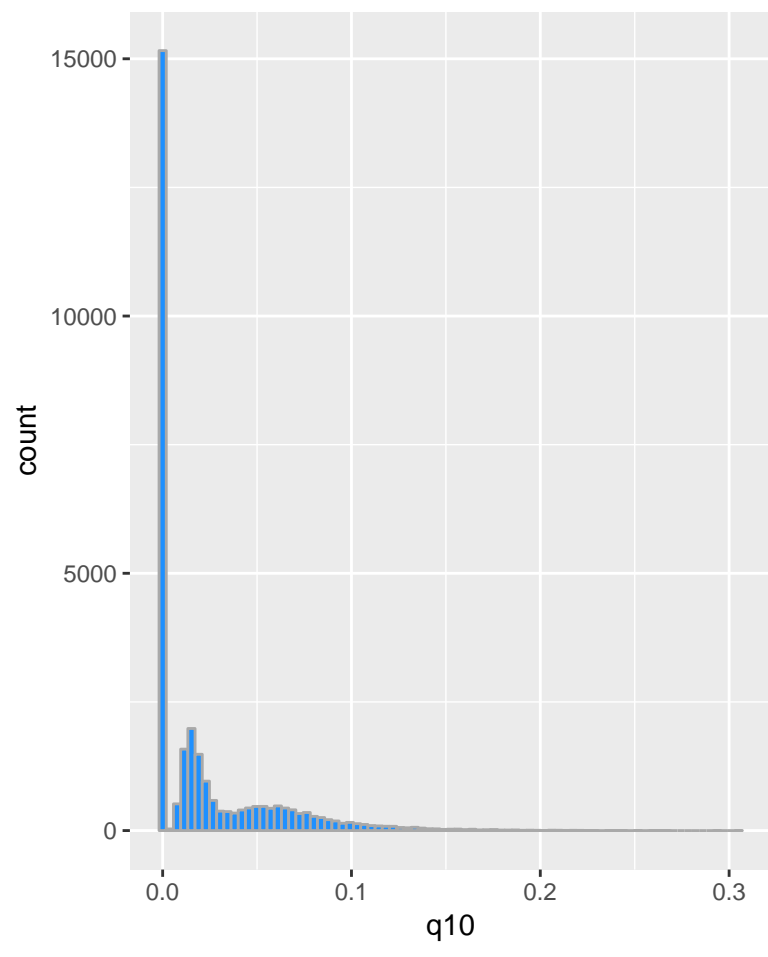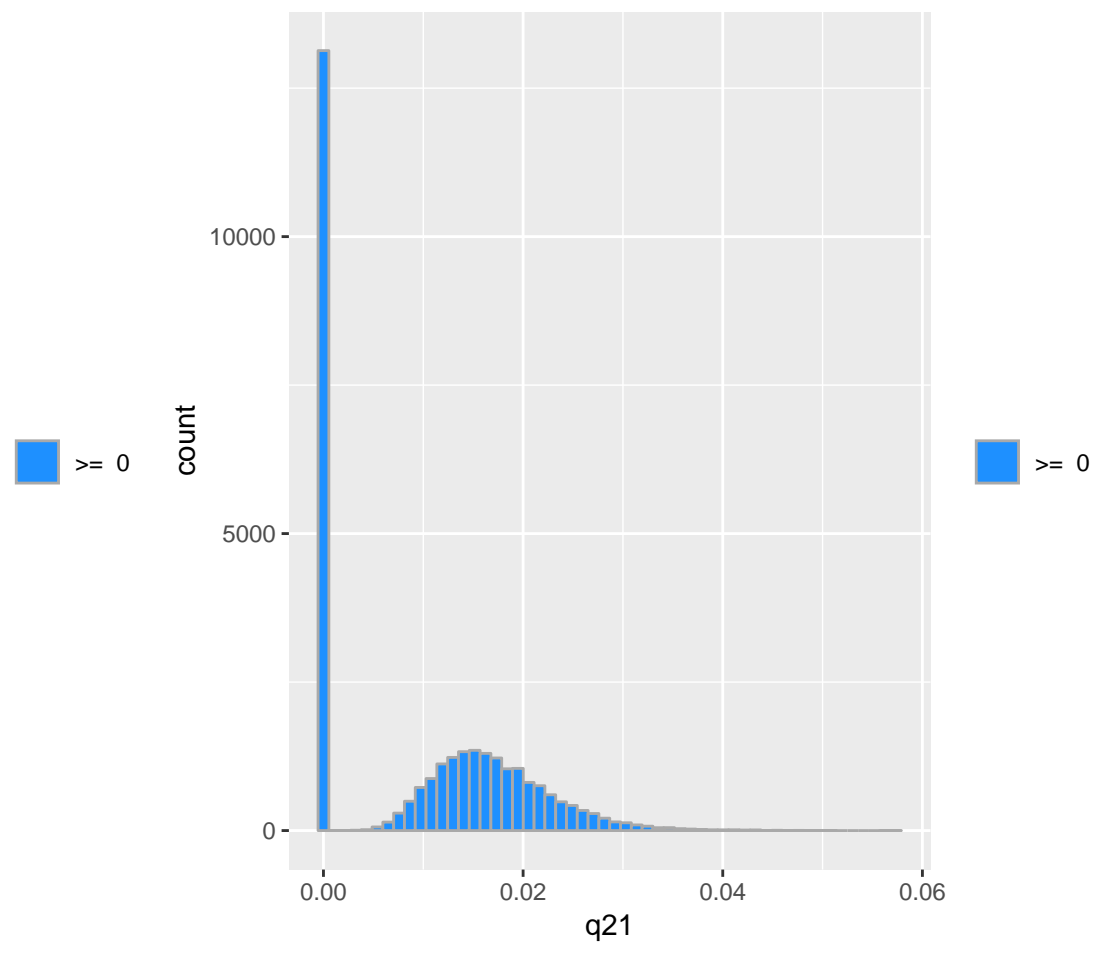

**Appendix S14.** Assessment of the MCMC chain from the Reversible-Jump analysis plotted with the function *mcmcPlots* showing the rate coefficients, autocorrelation plot and sliding mean plot.

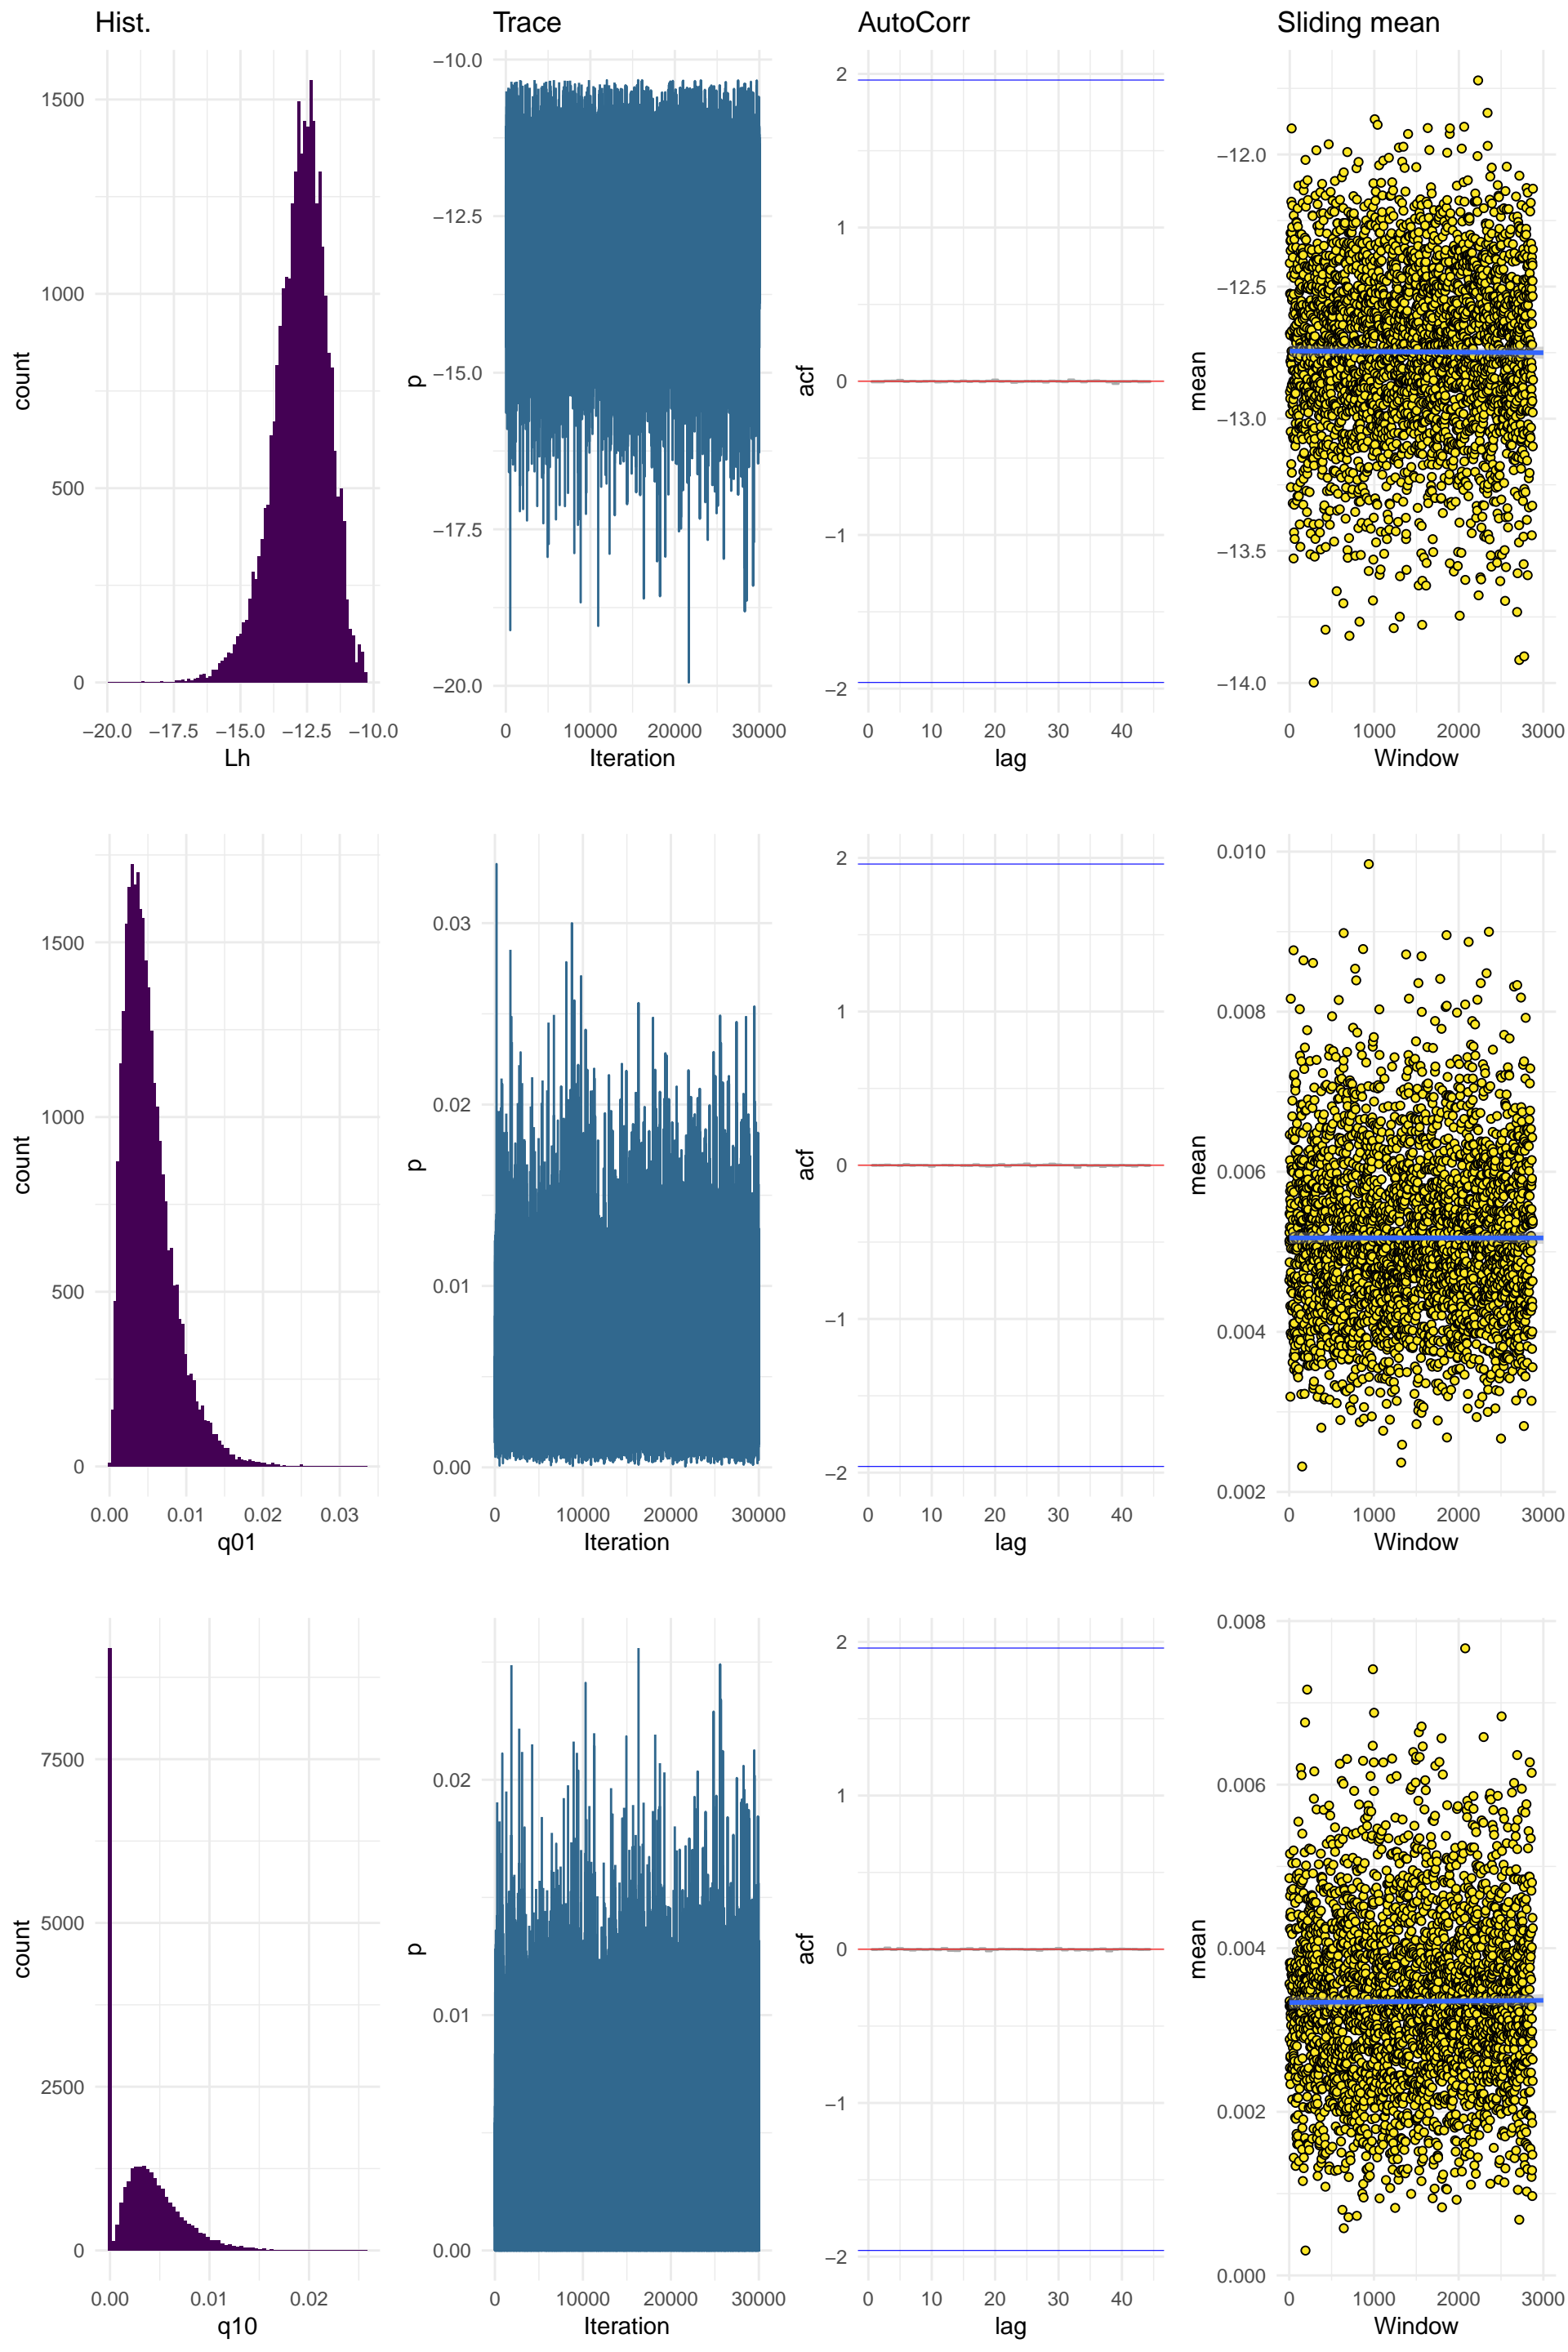

Hist.

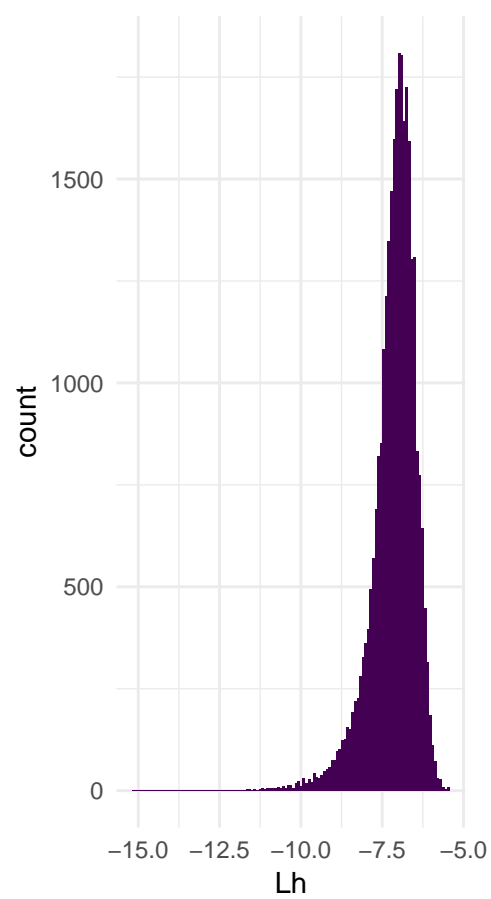

Trace

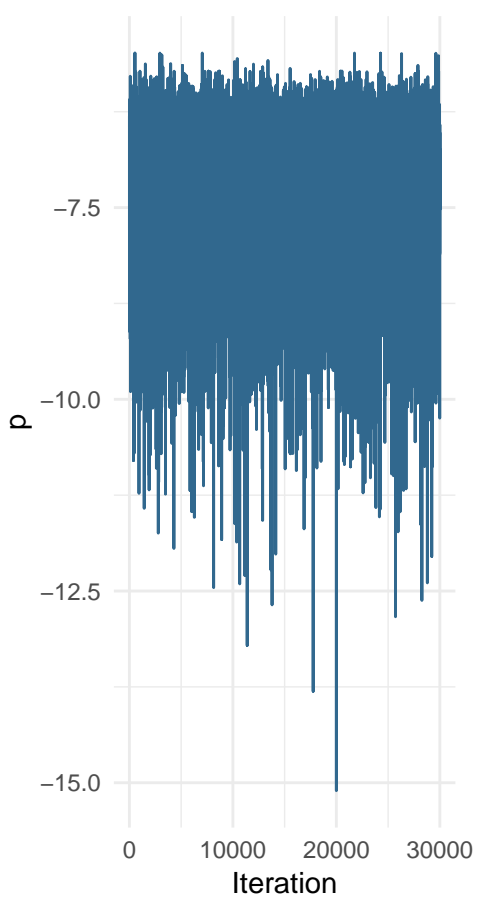

AutoCorr

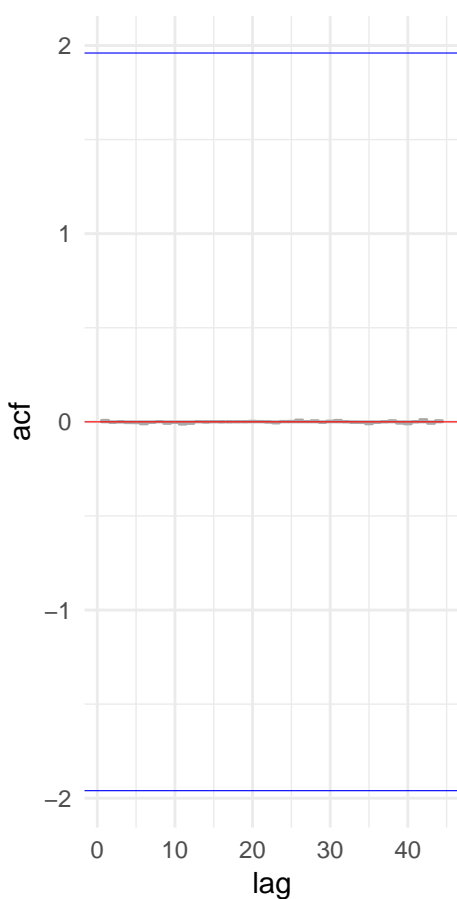

Sliding mean

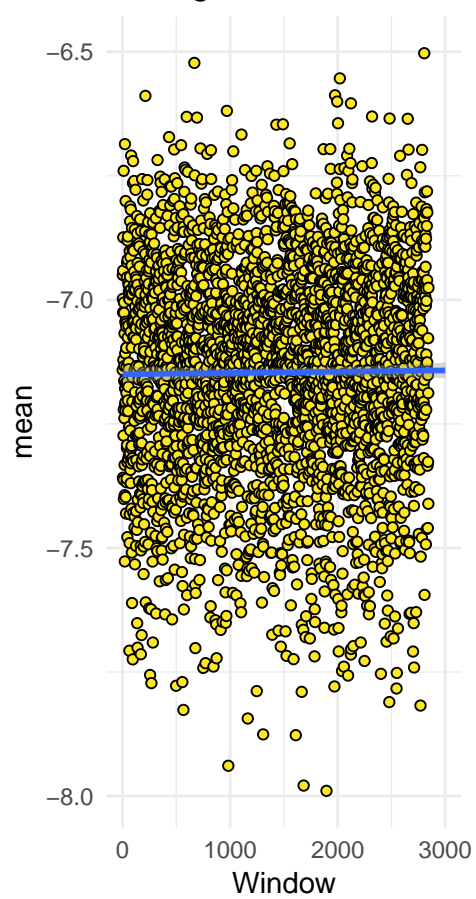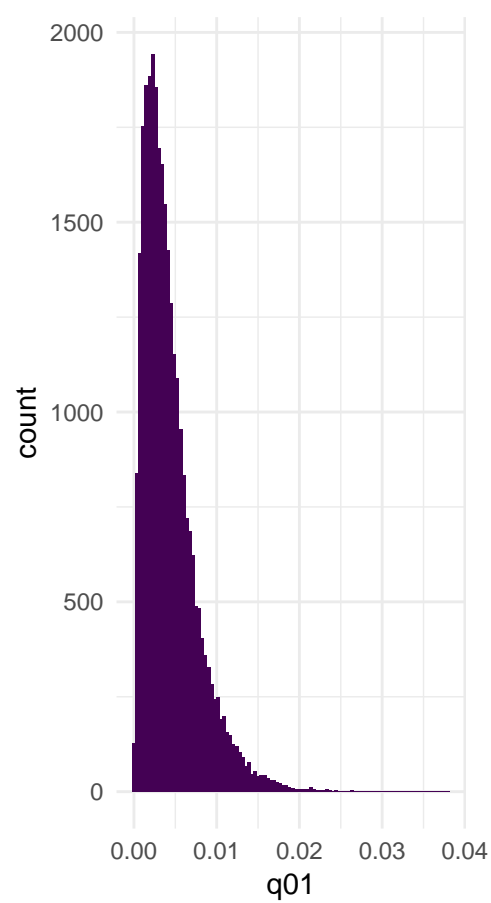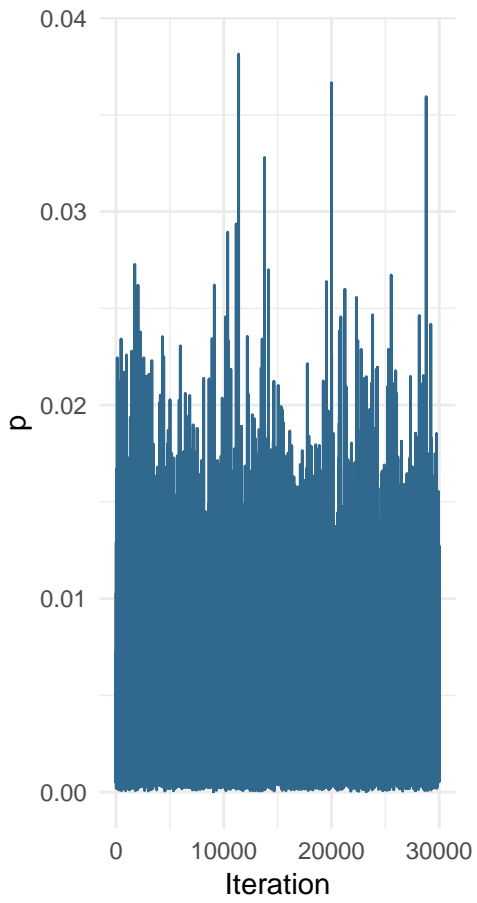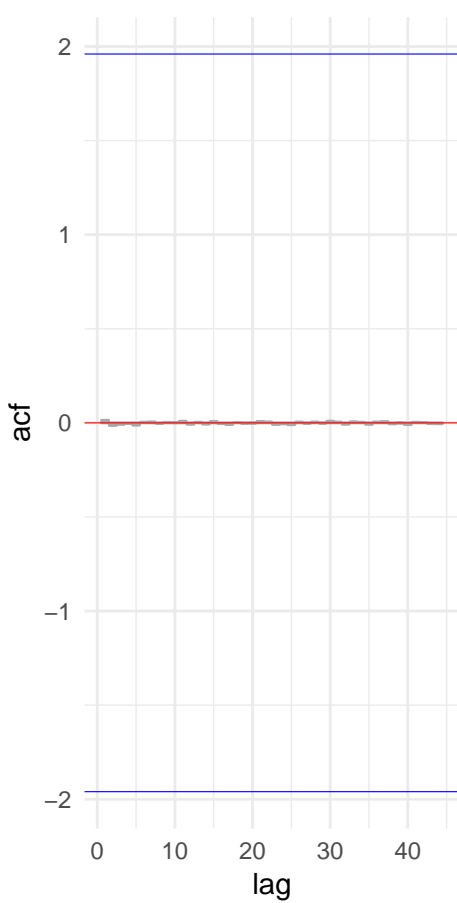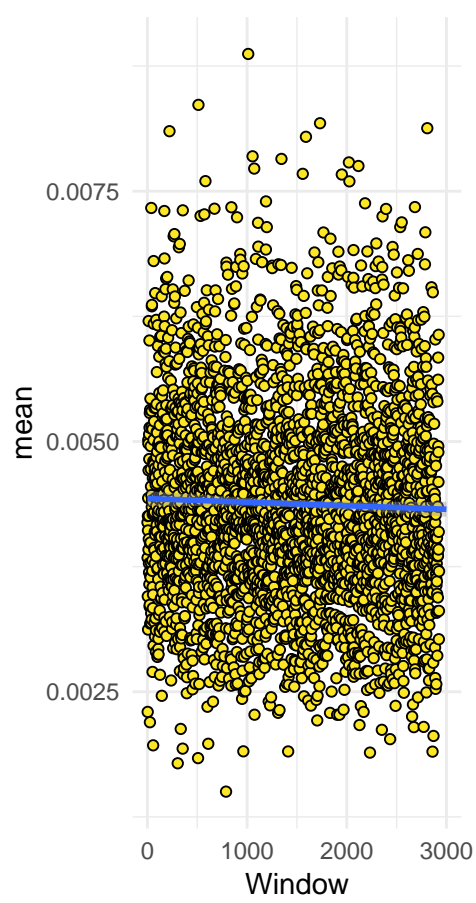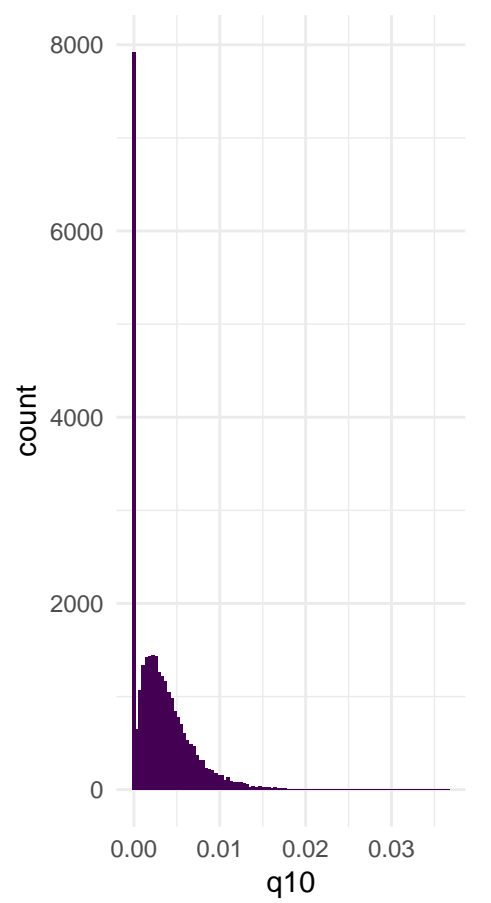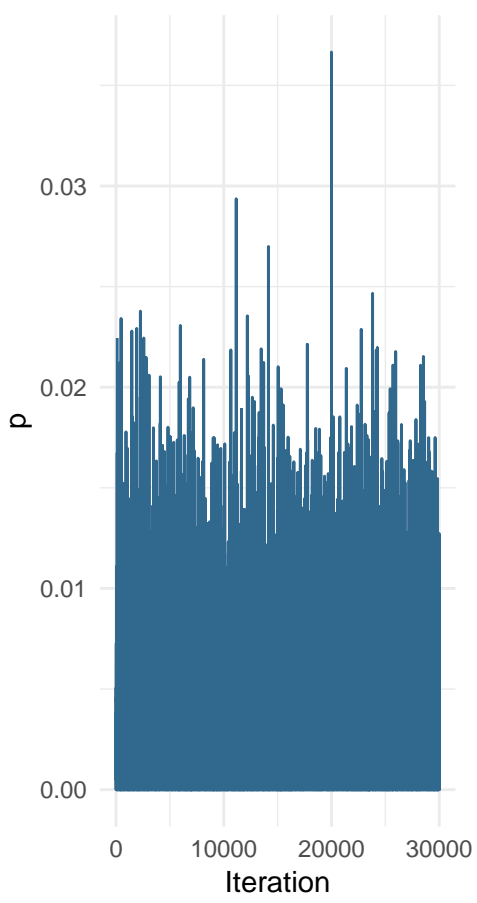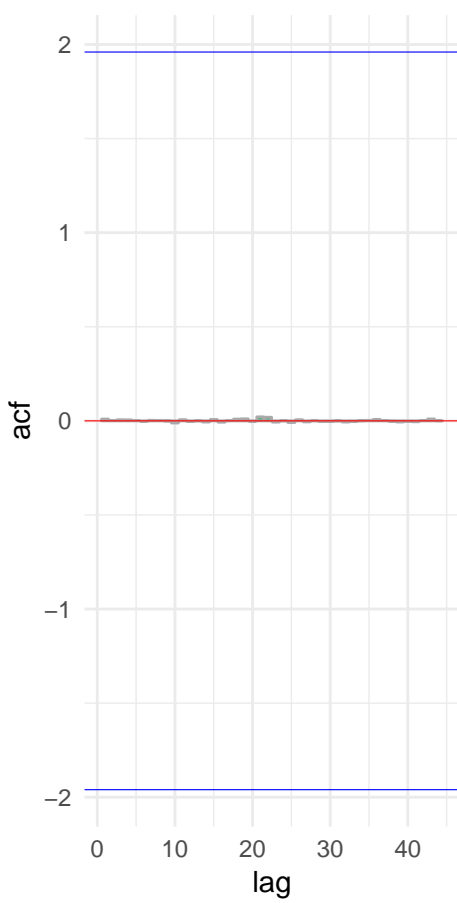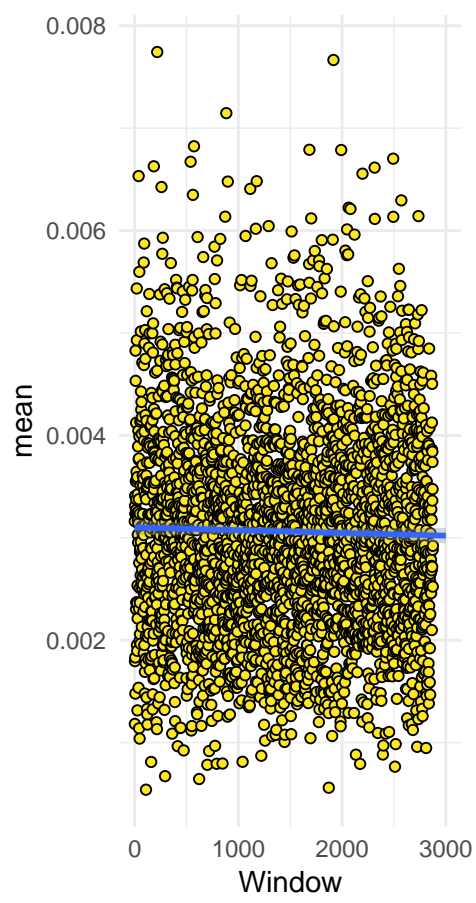

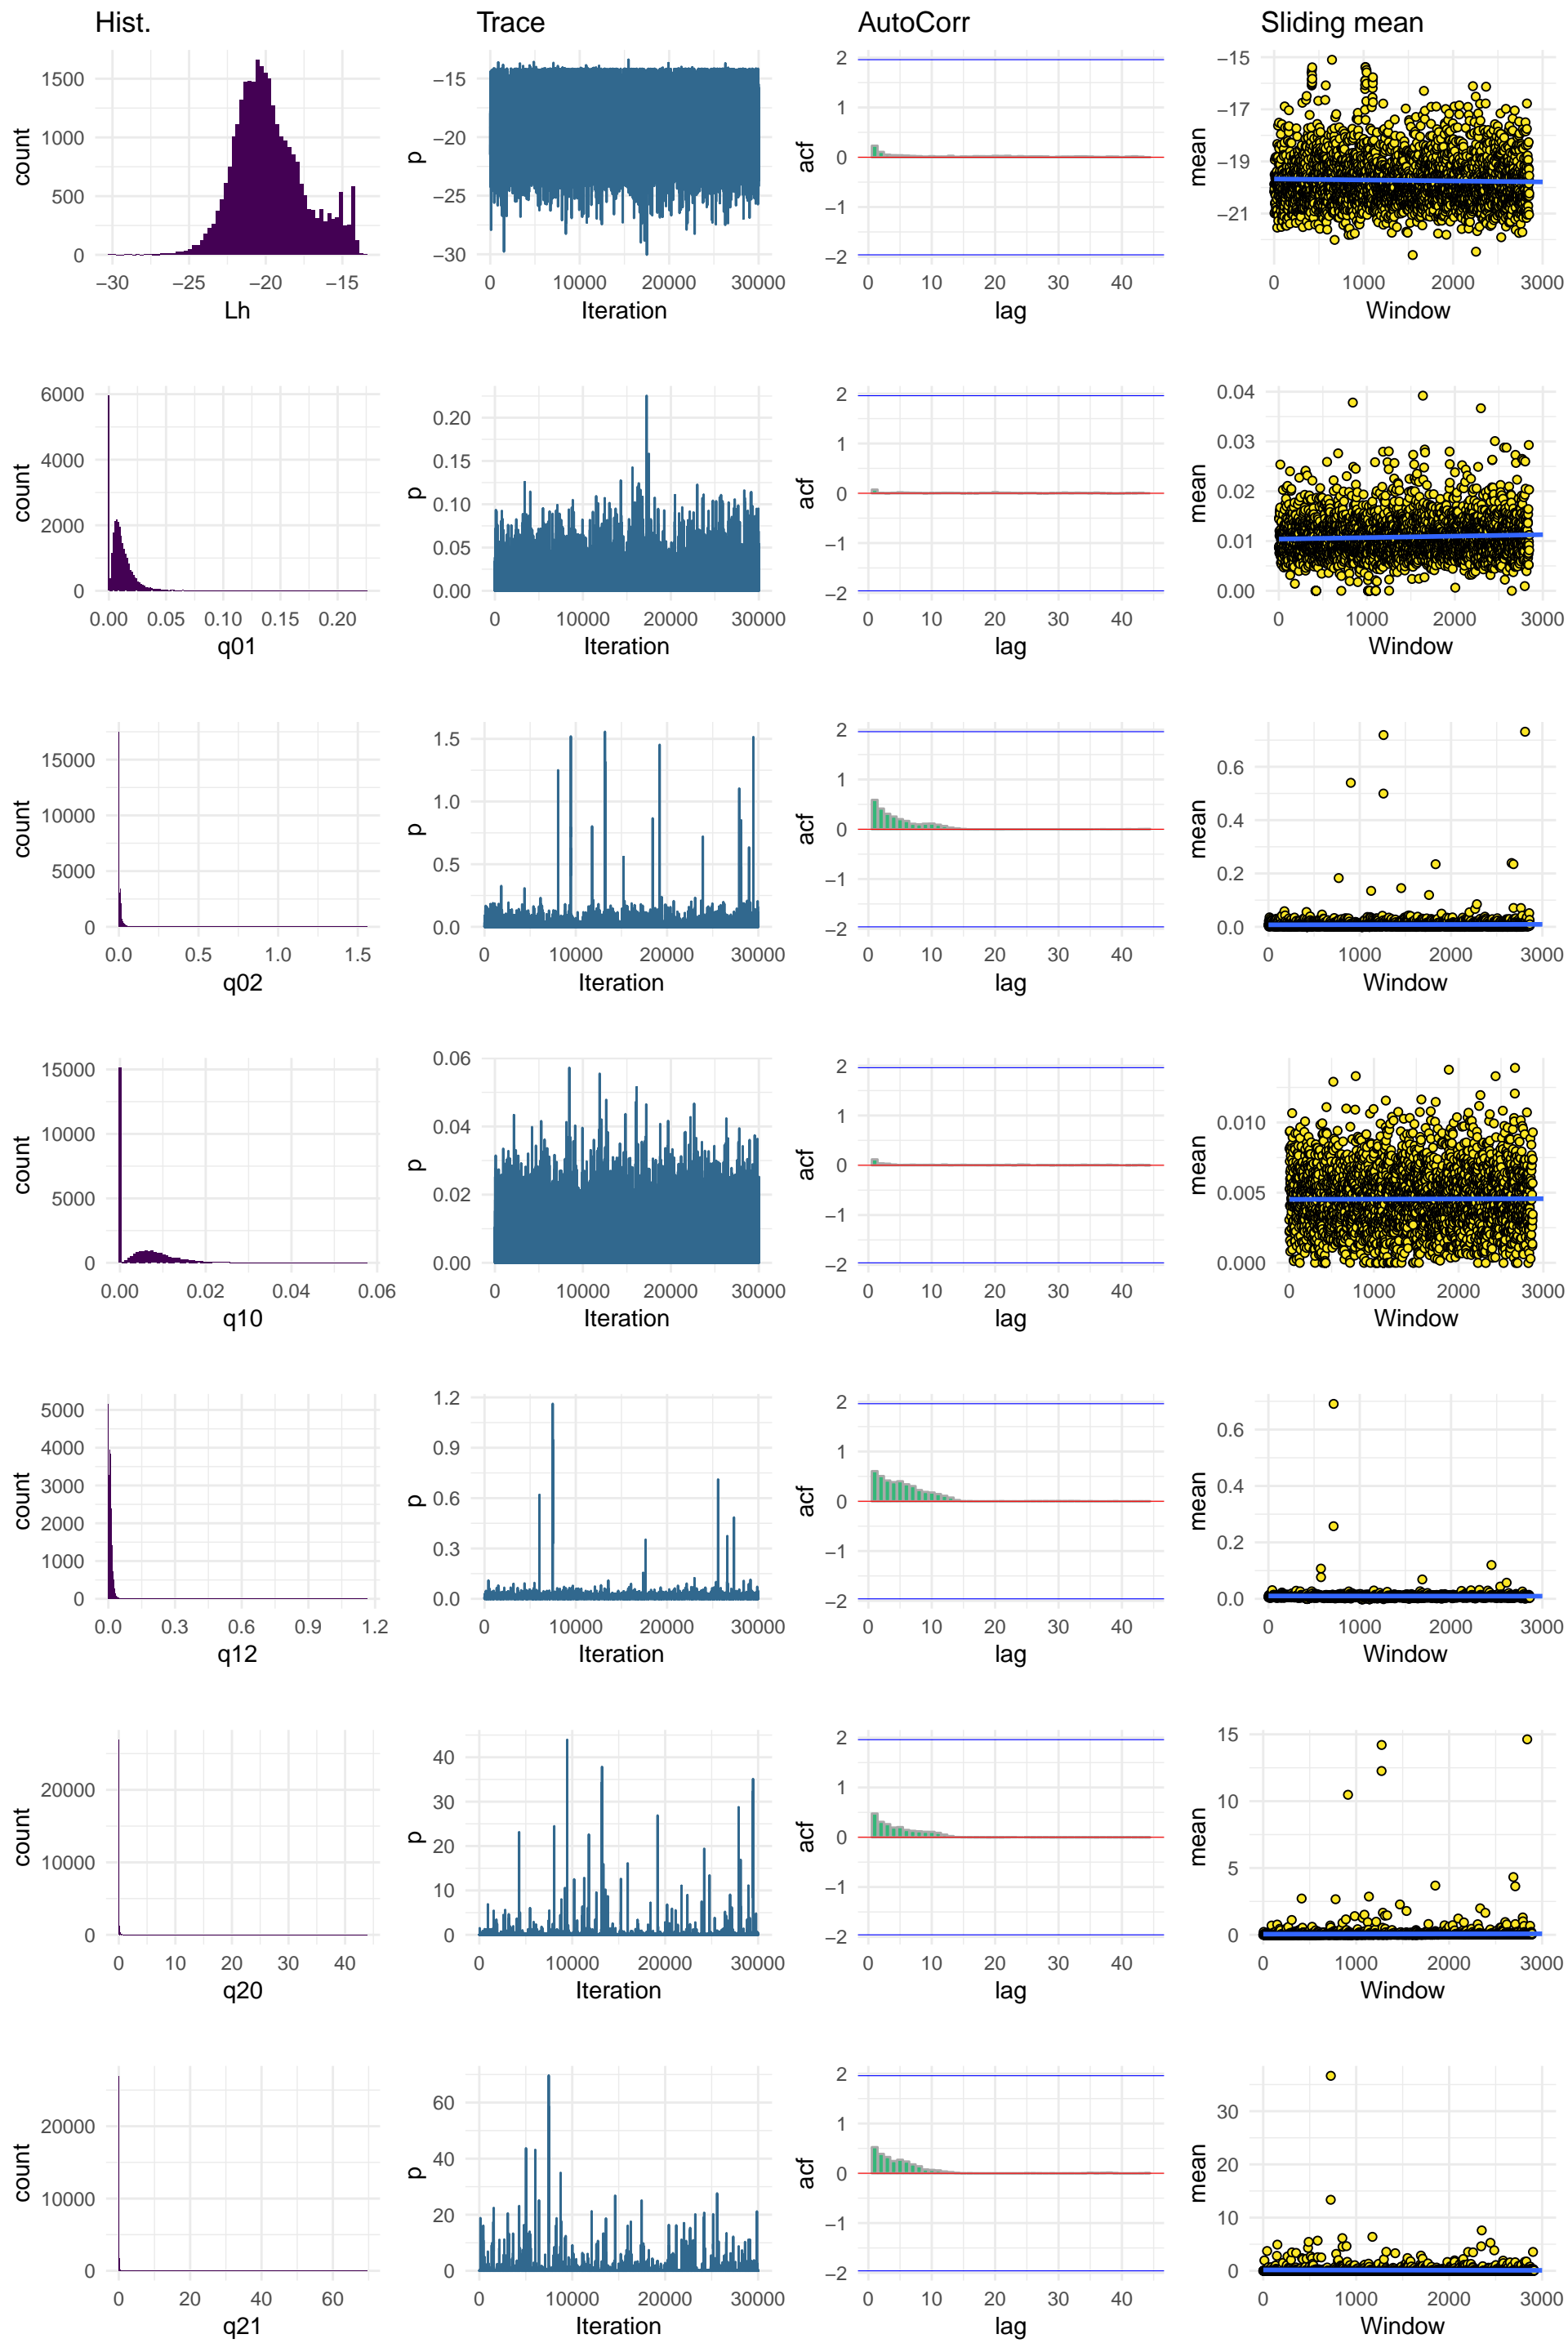

Hist.

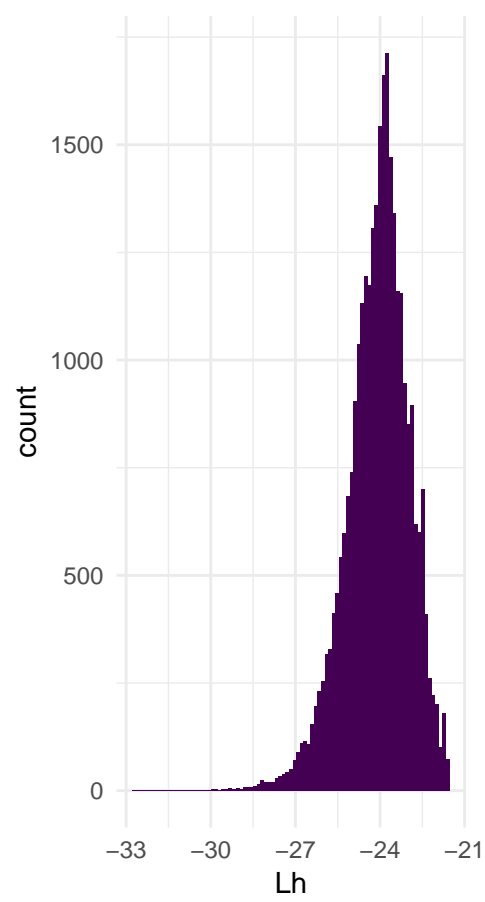

Trace

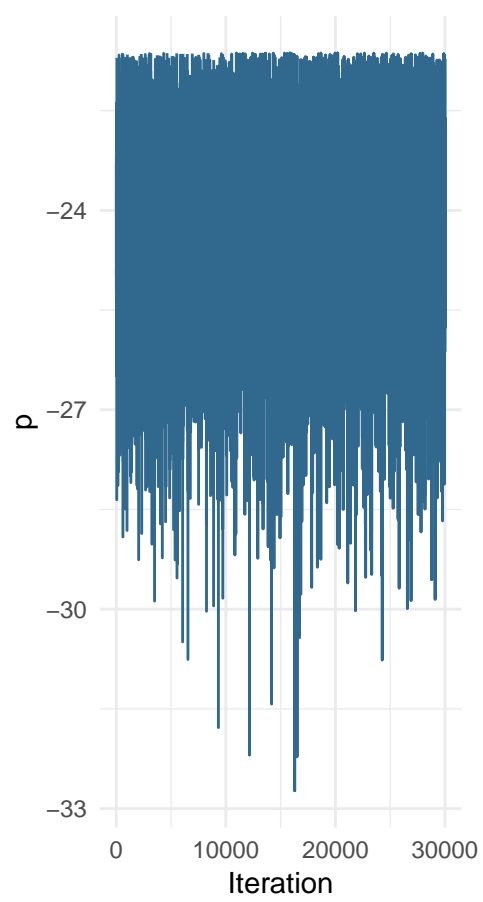

AutoCorr

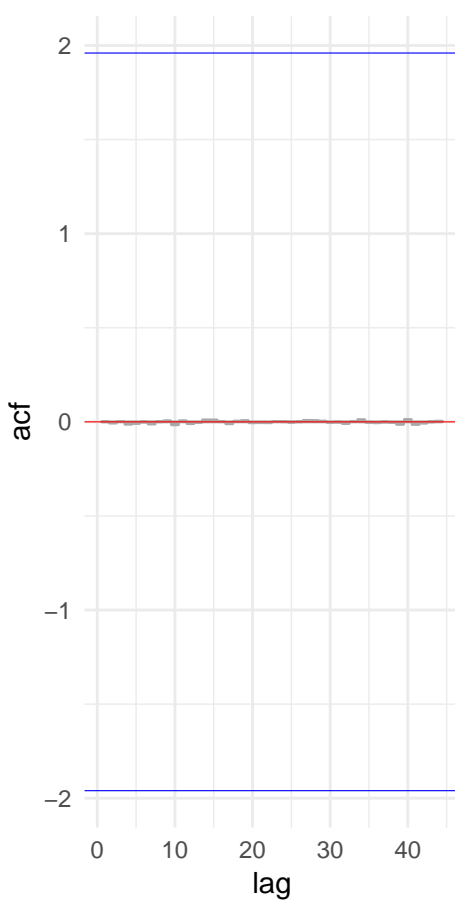

Sliding mean

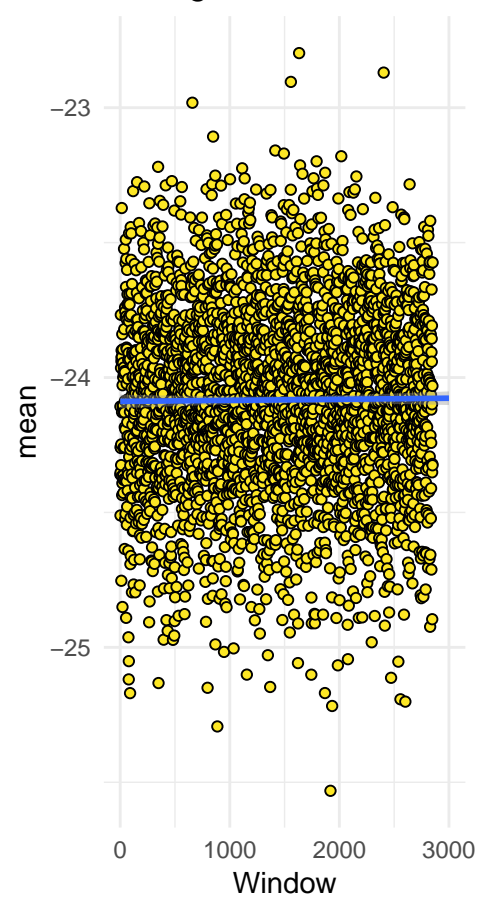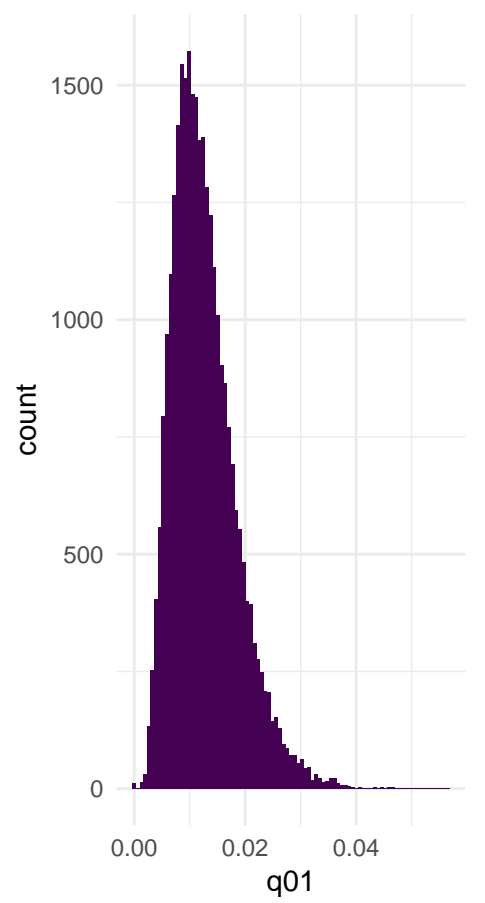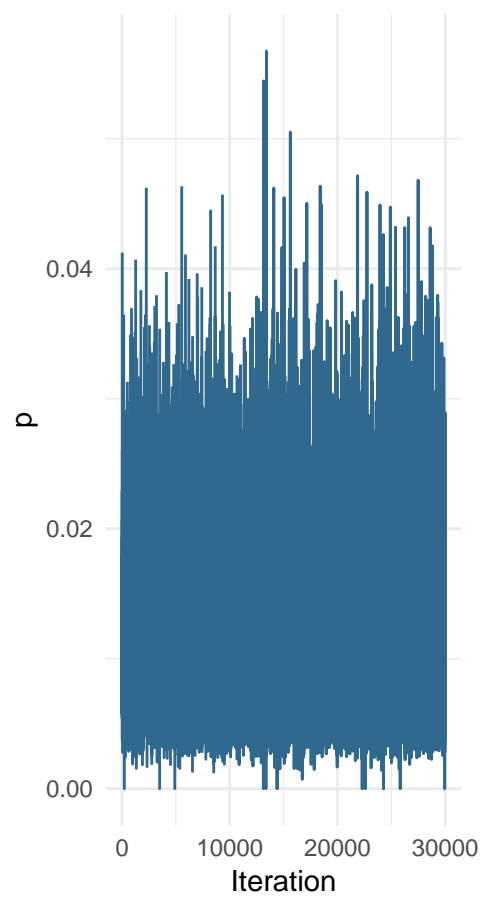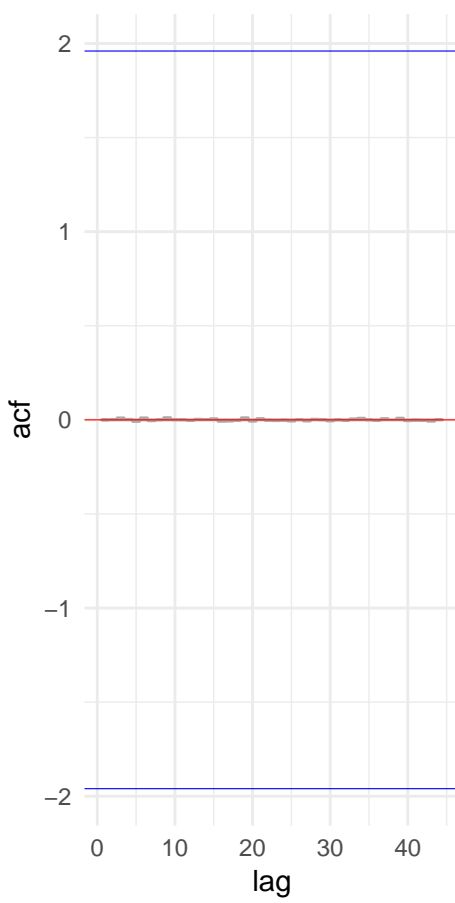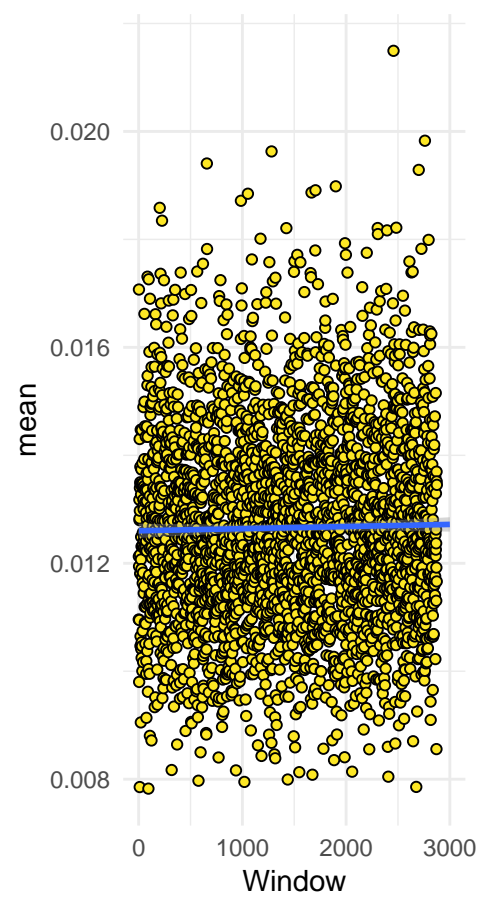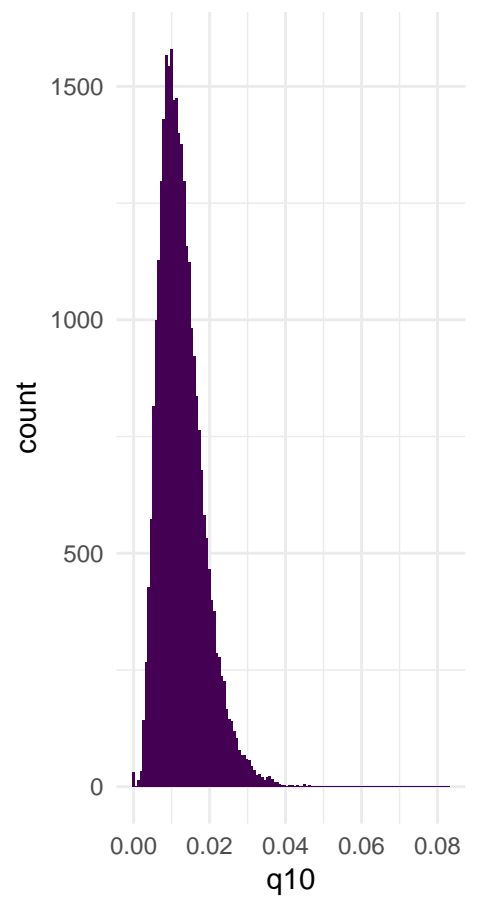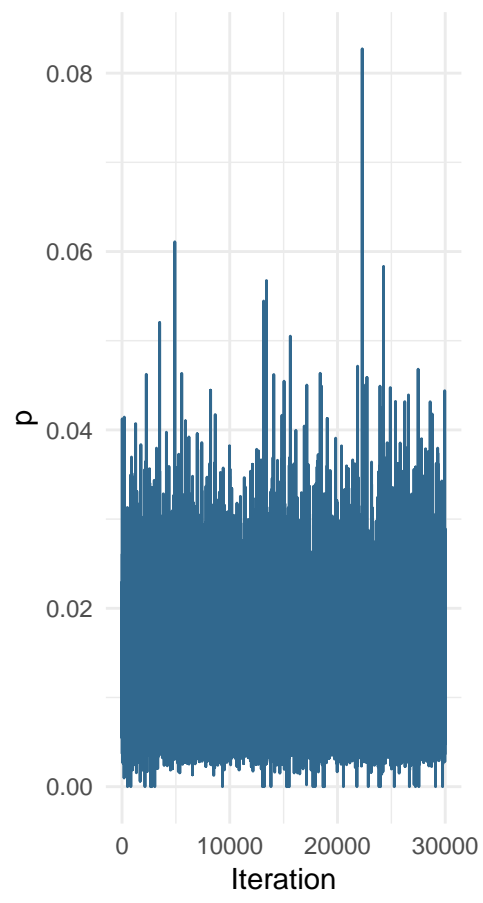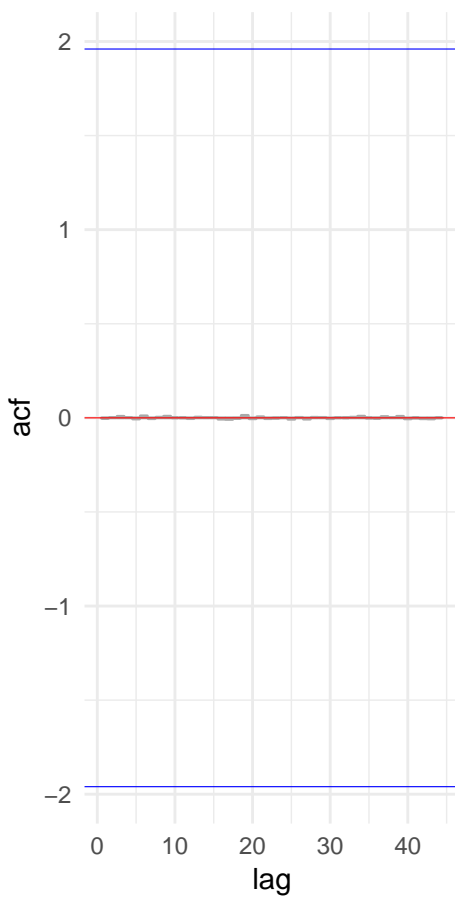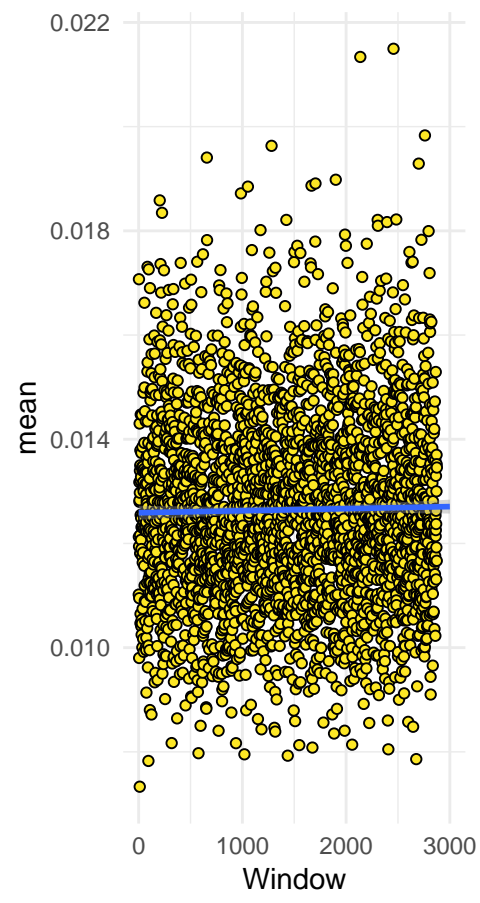

Hist.

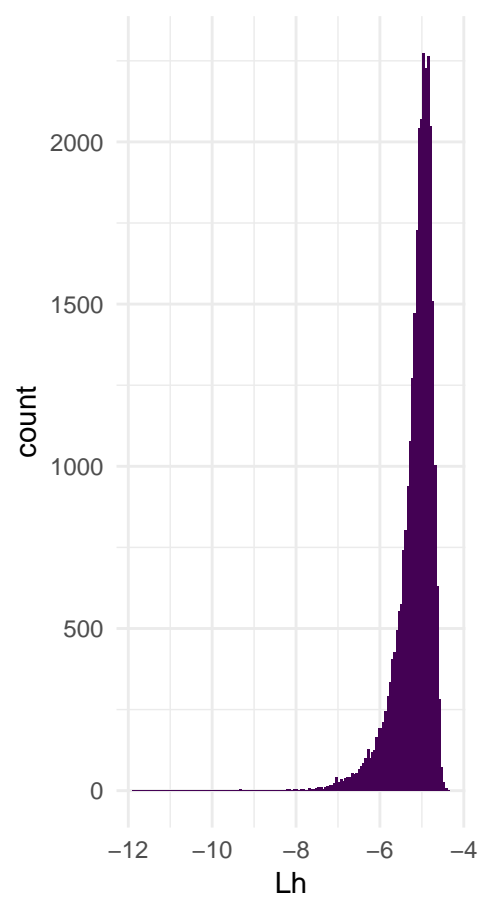

Trace

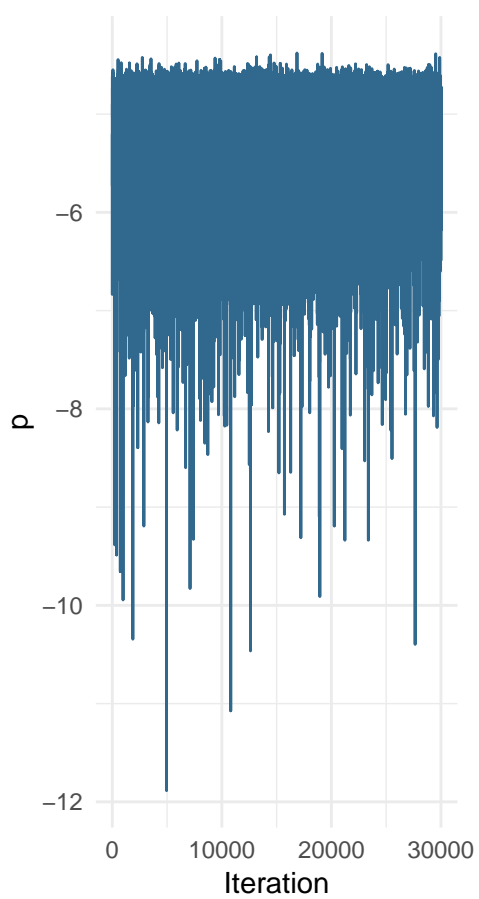

AutoCorr

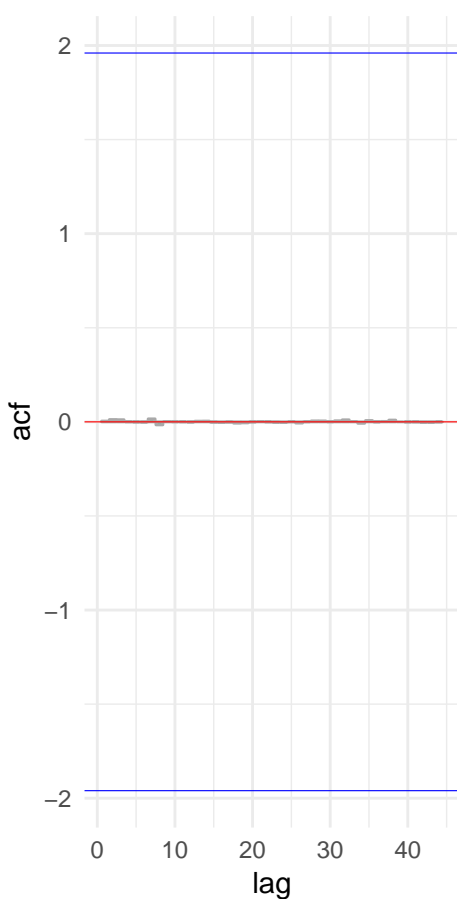

Sliding mean

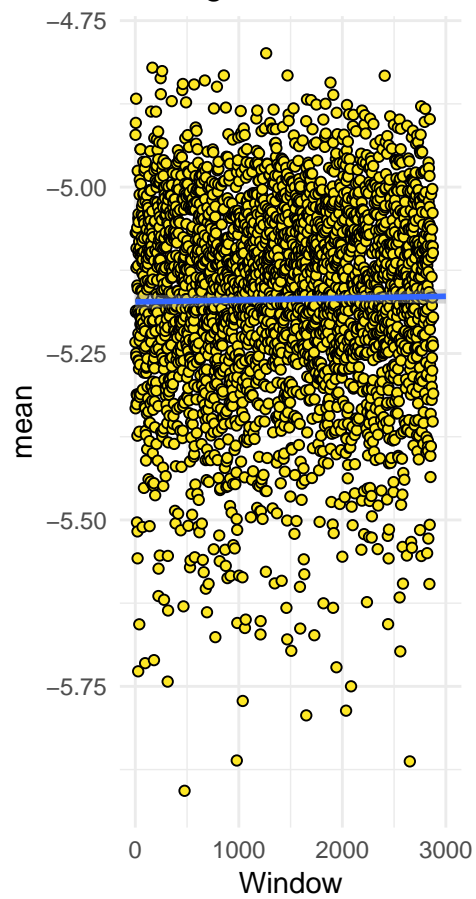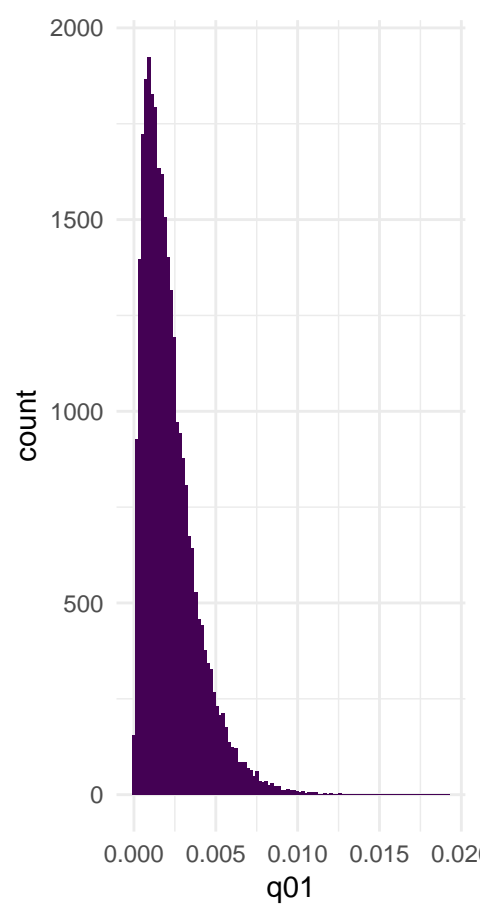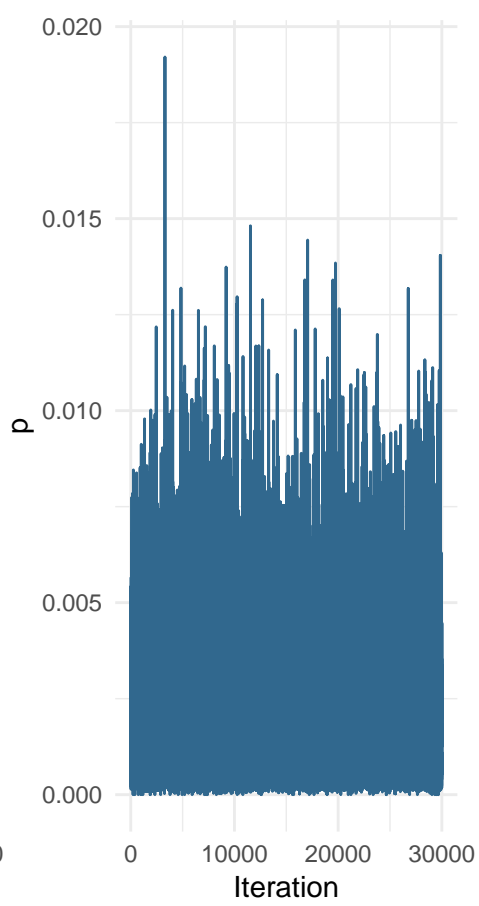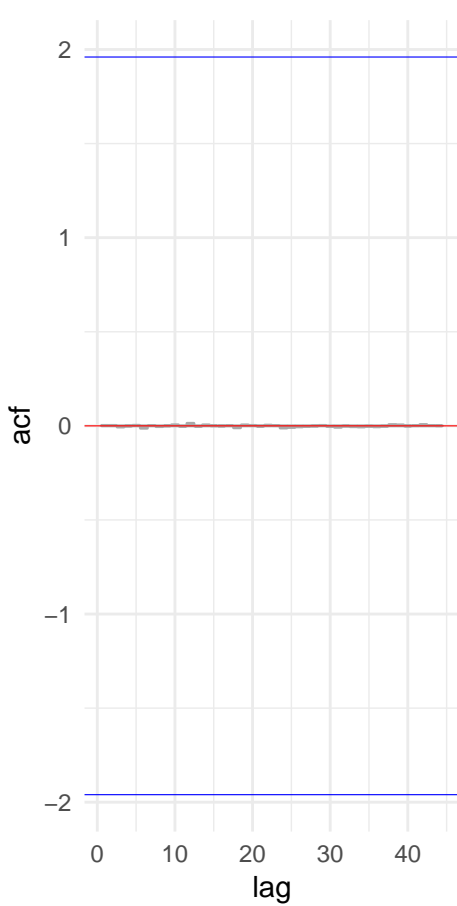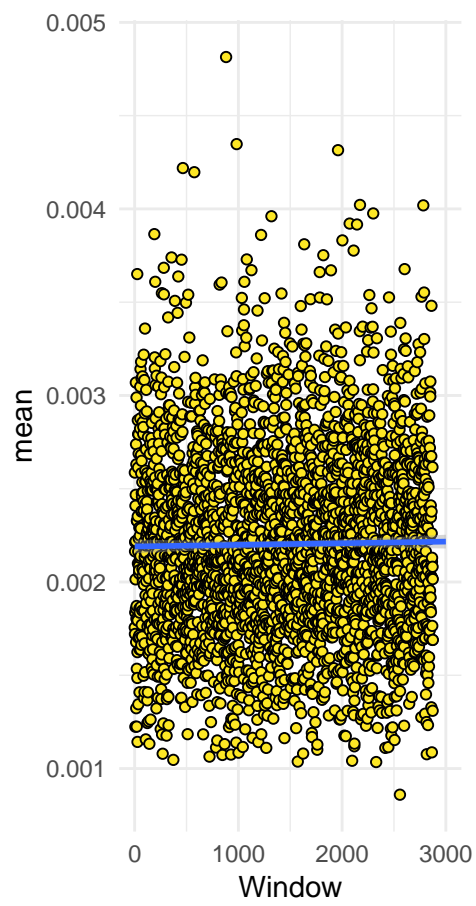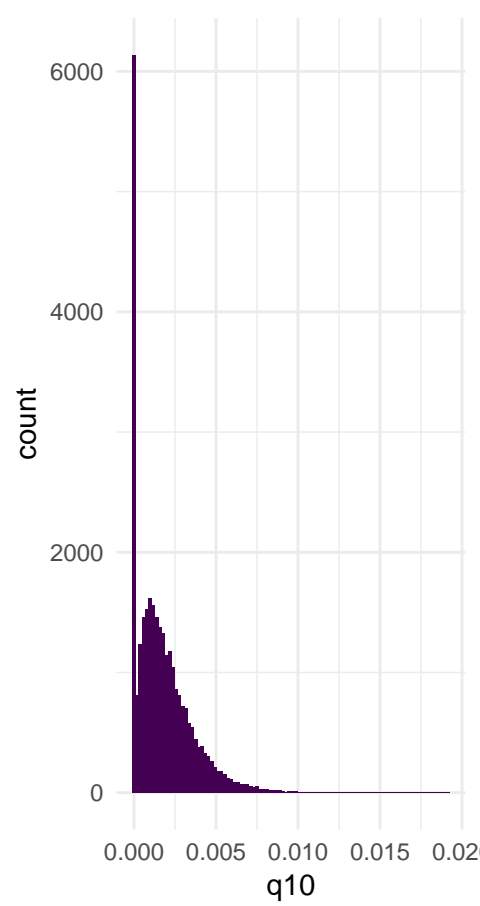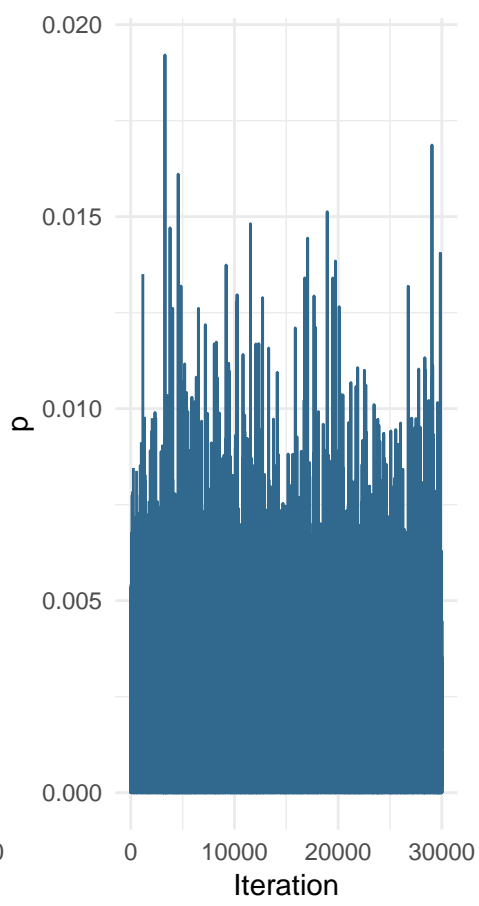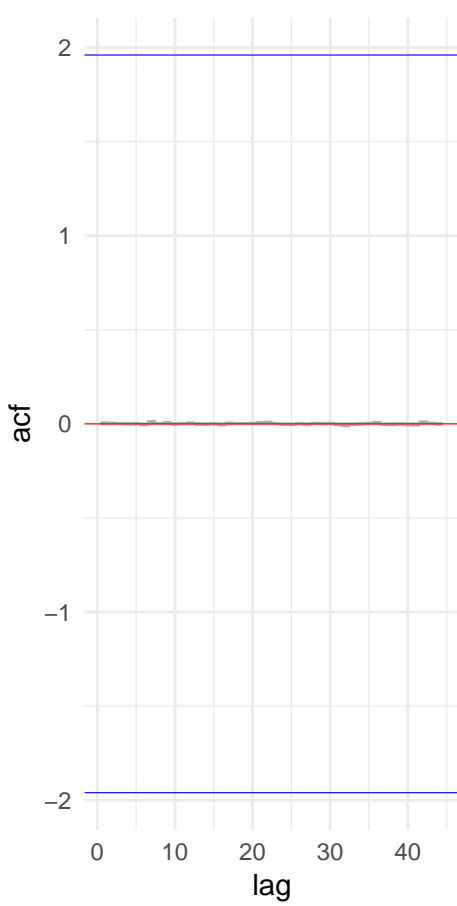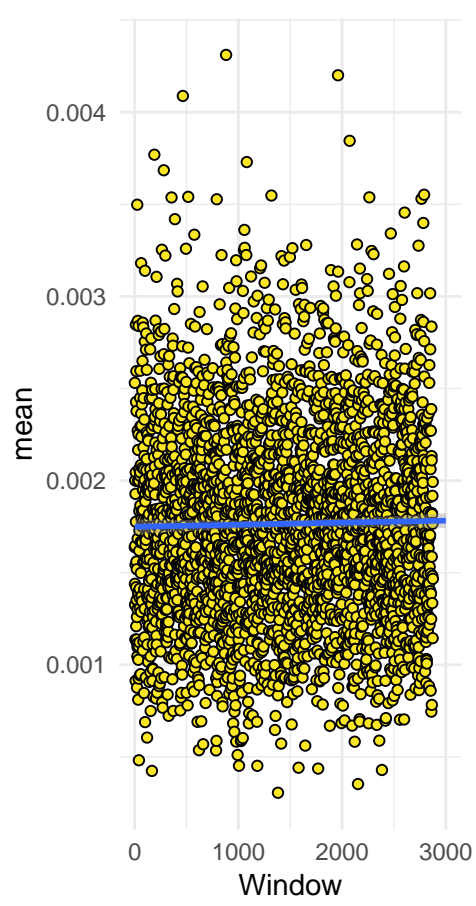

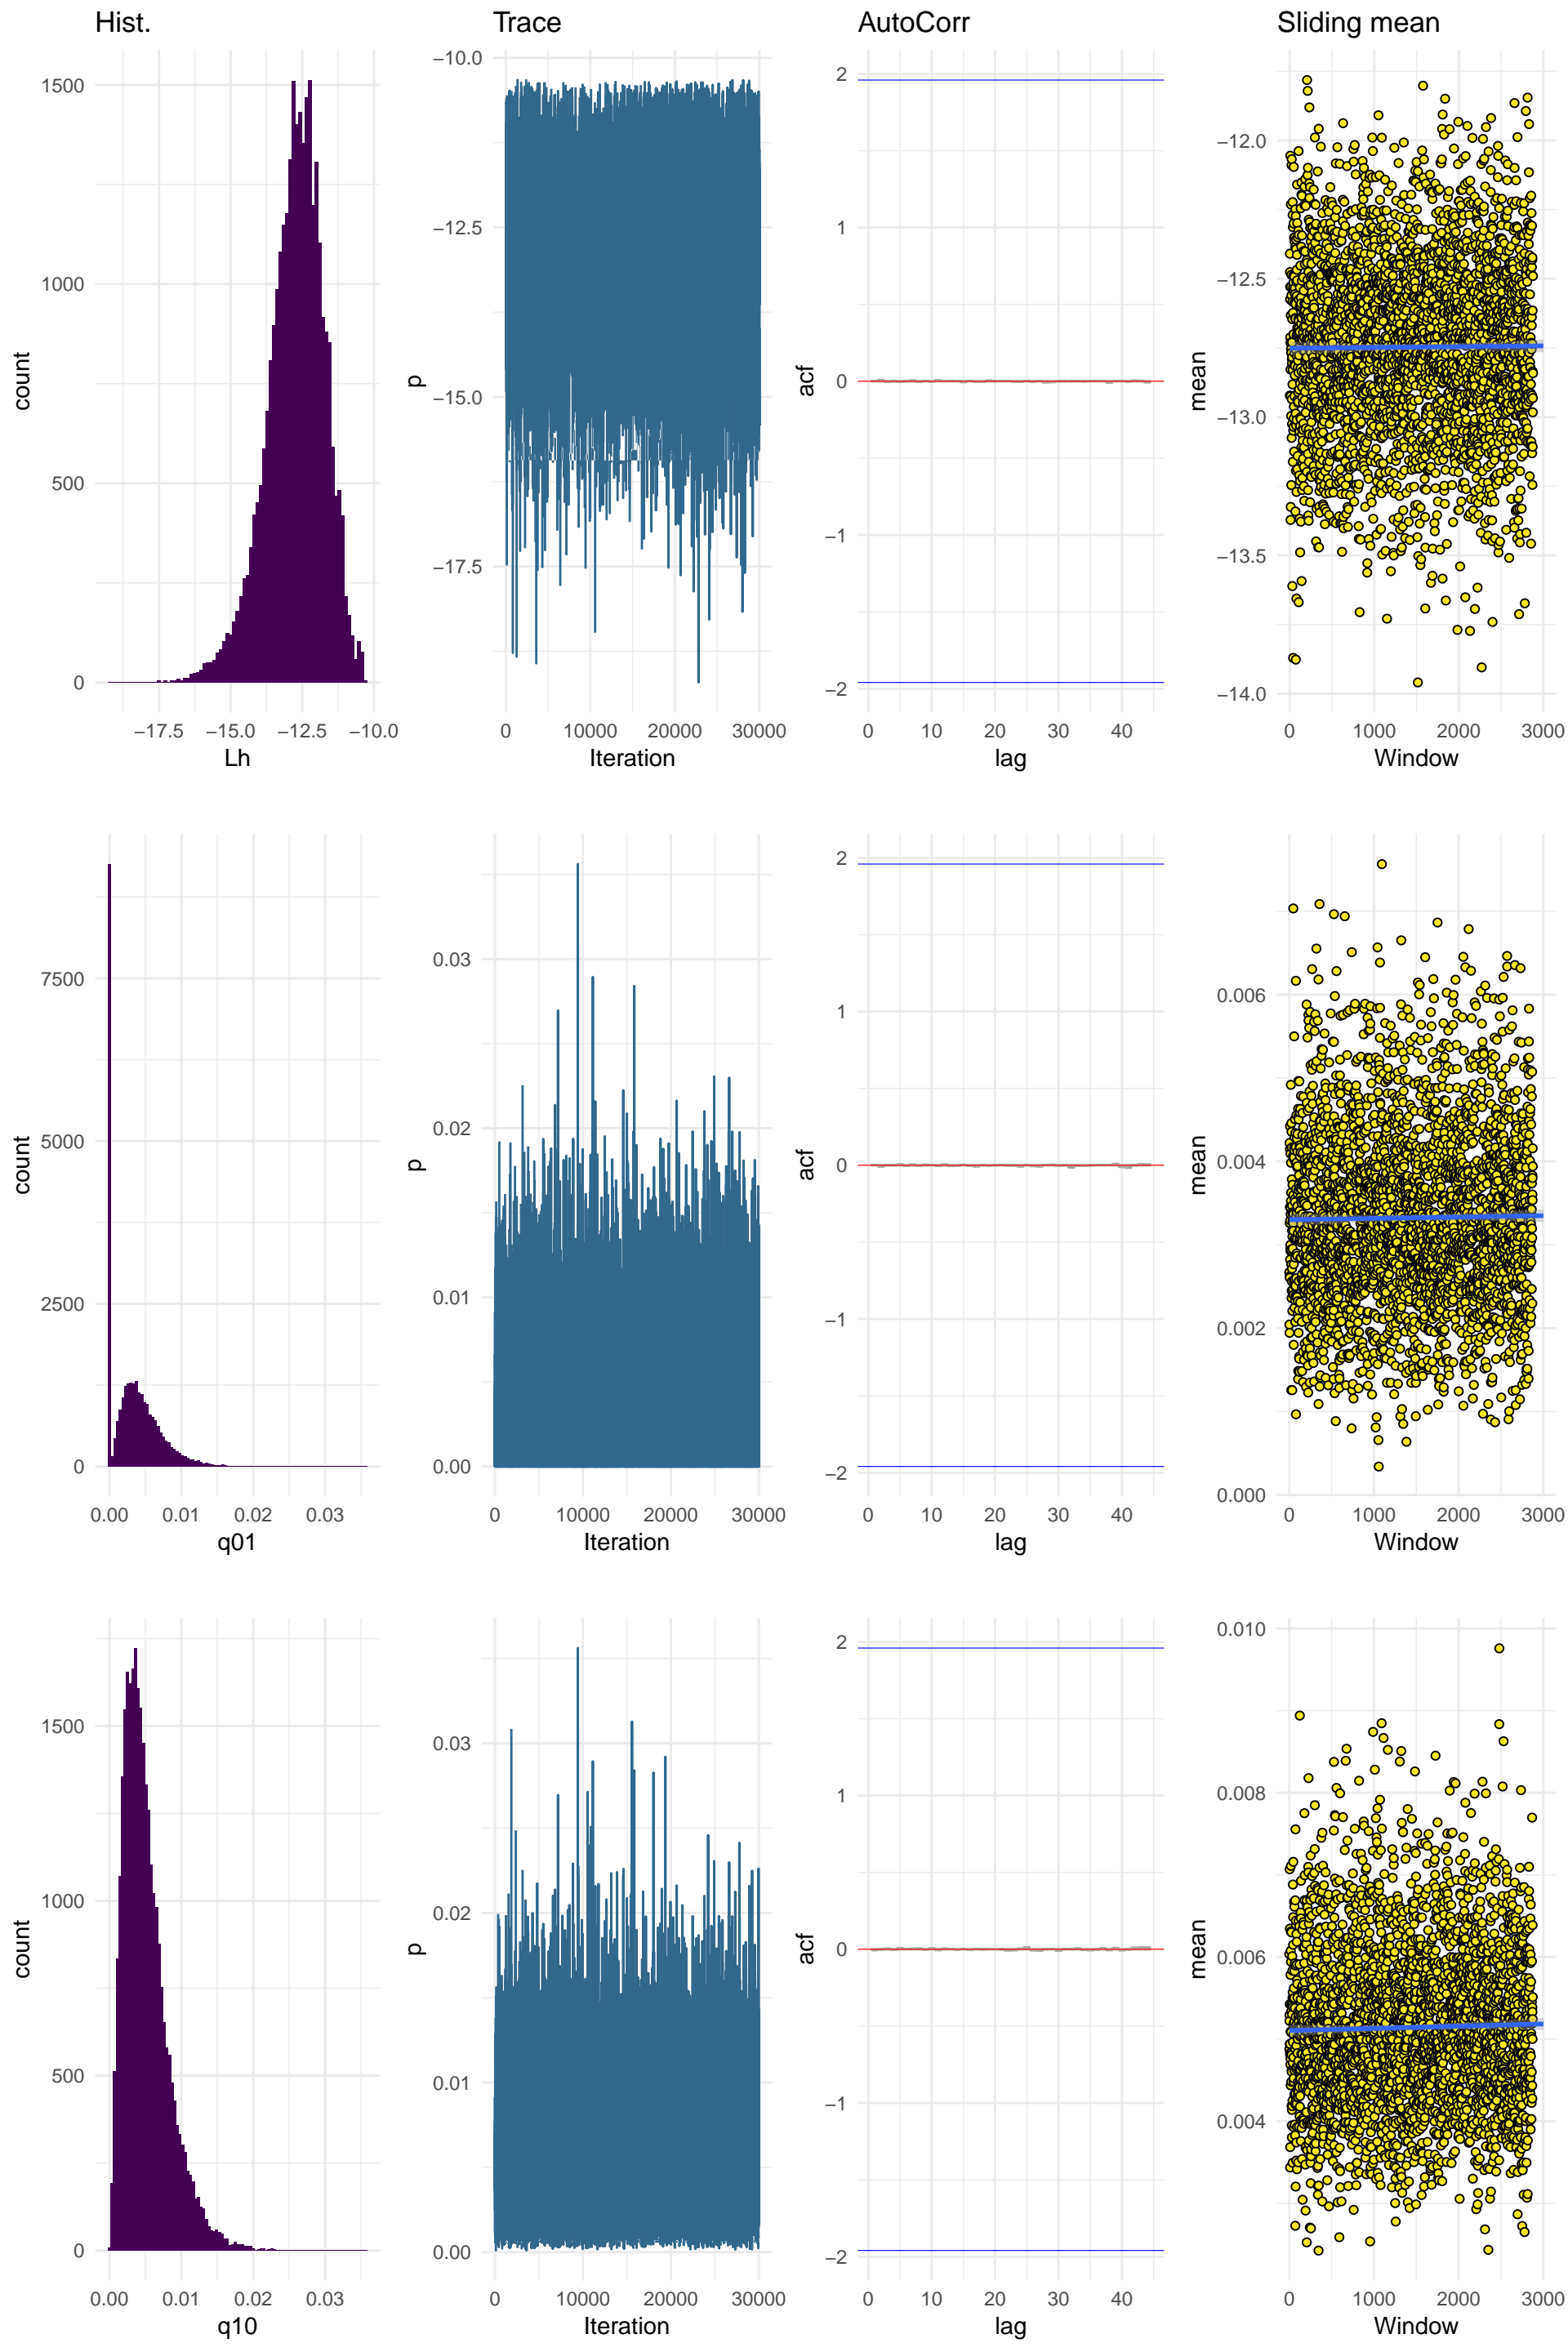



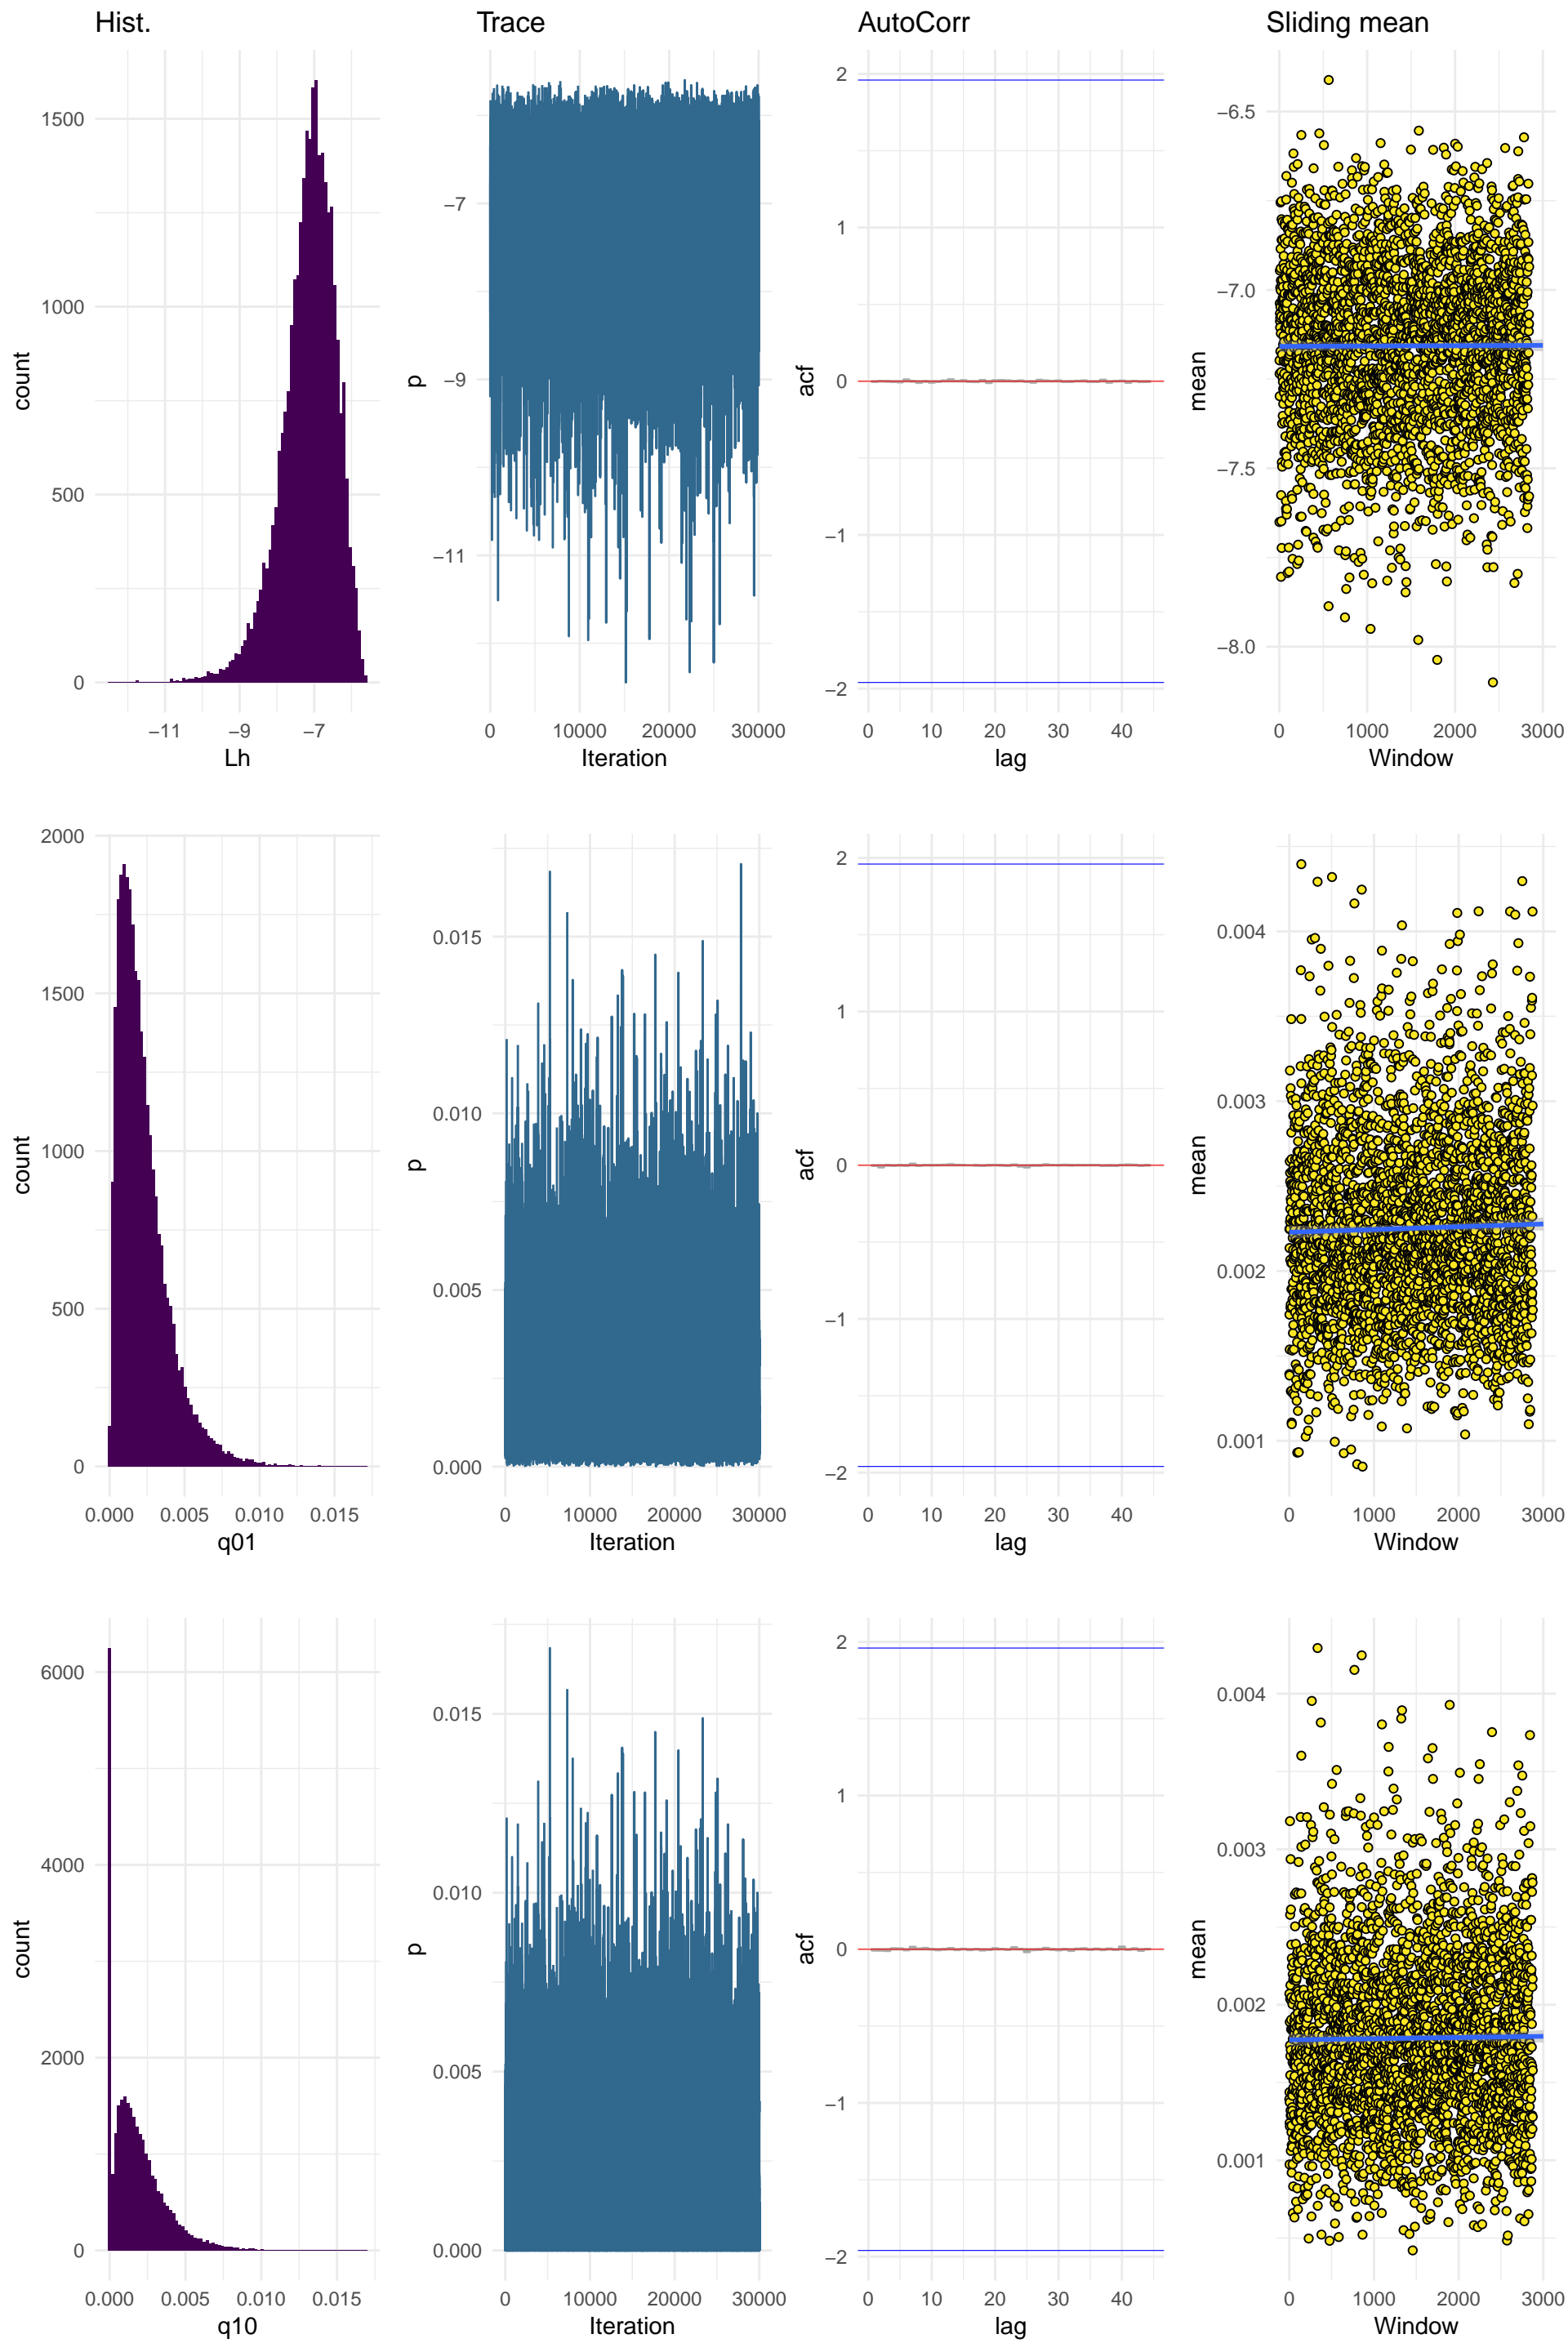

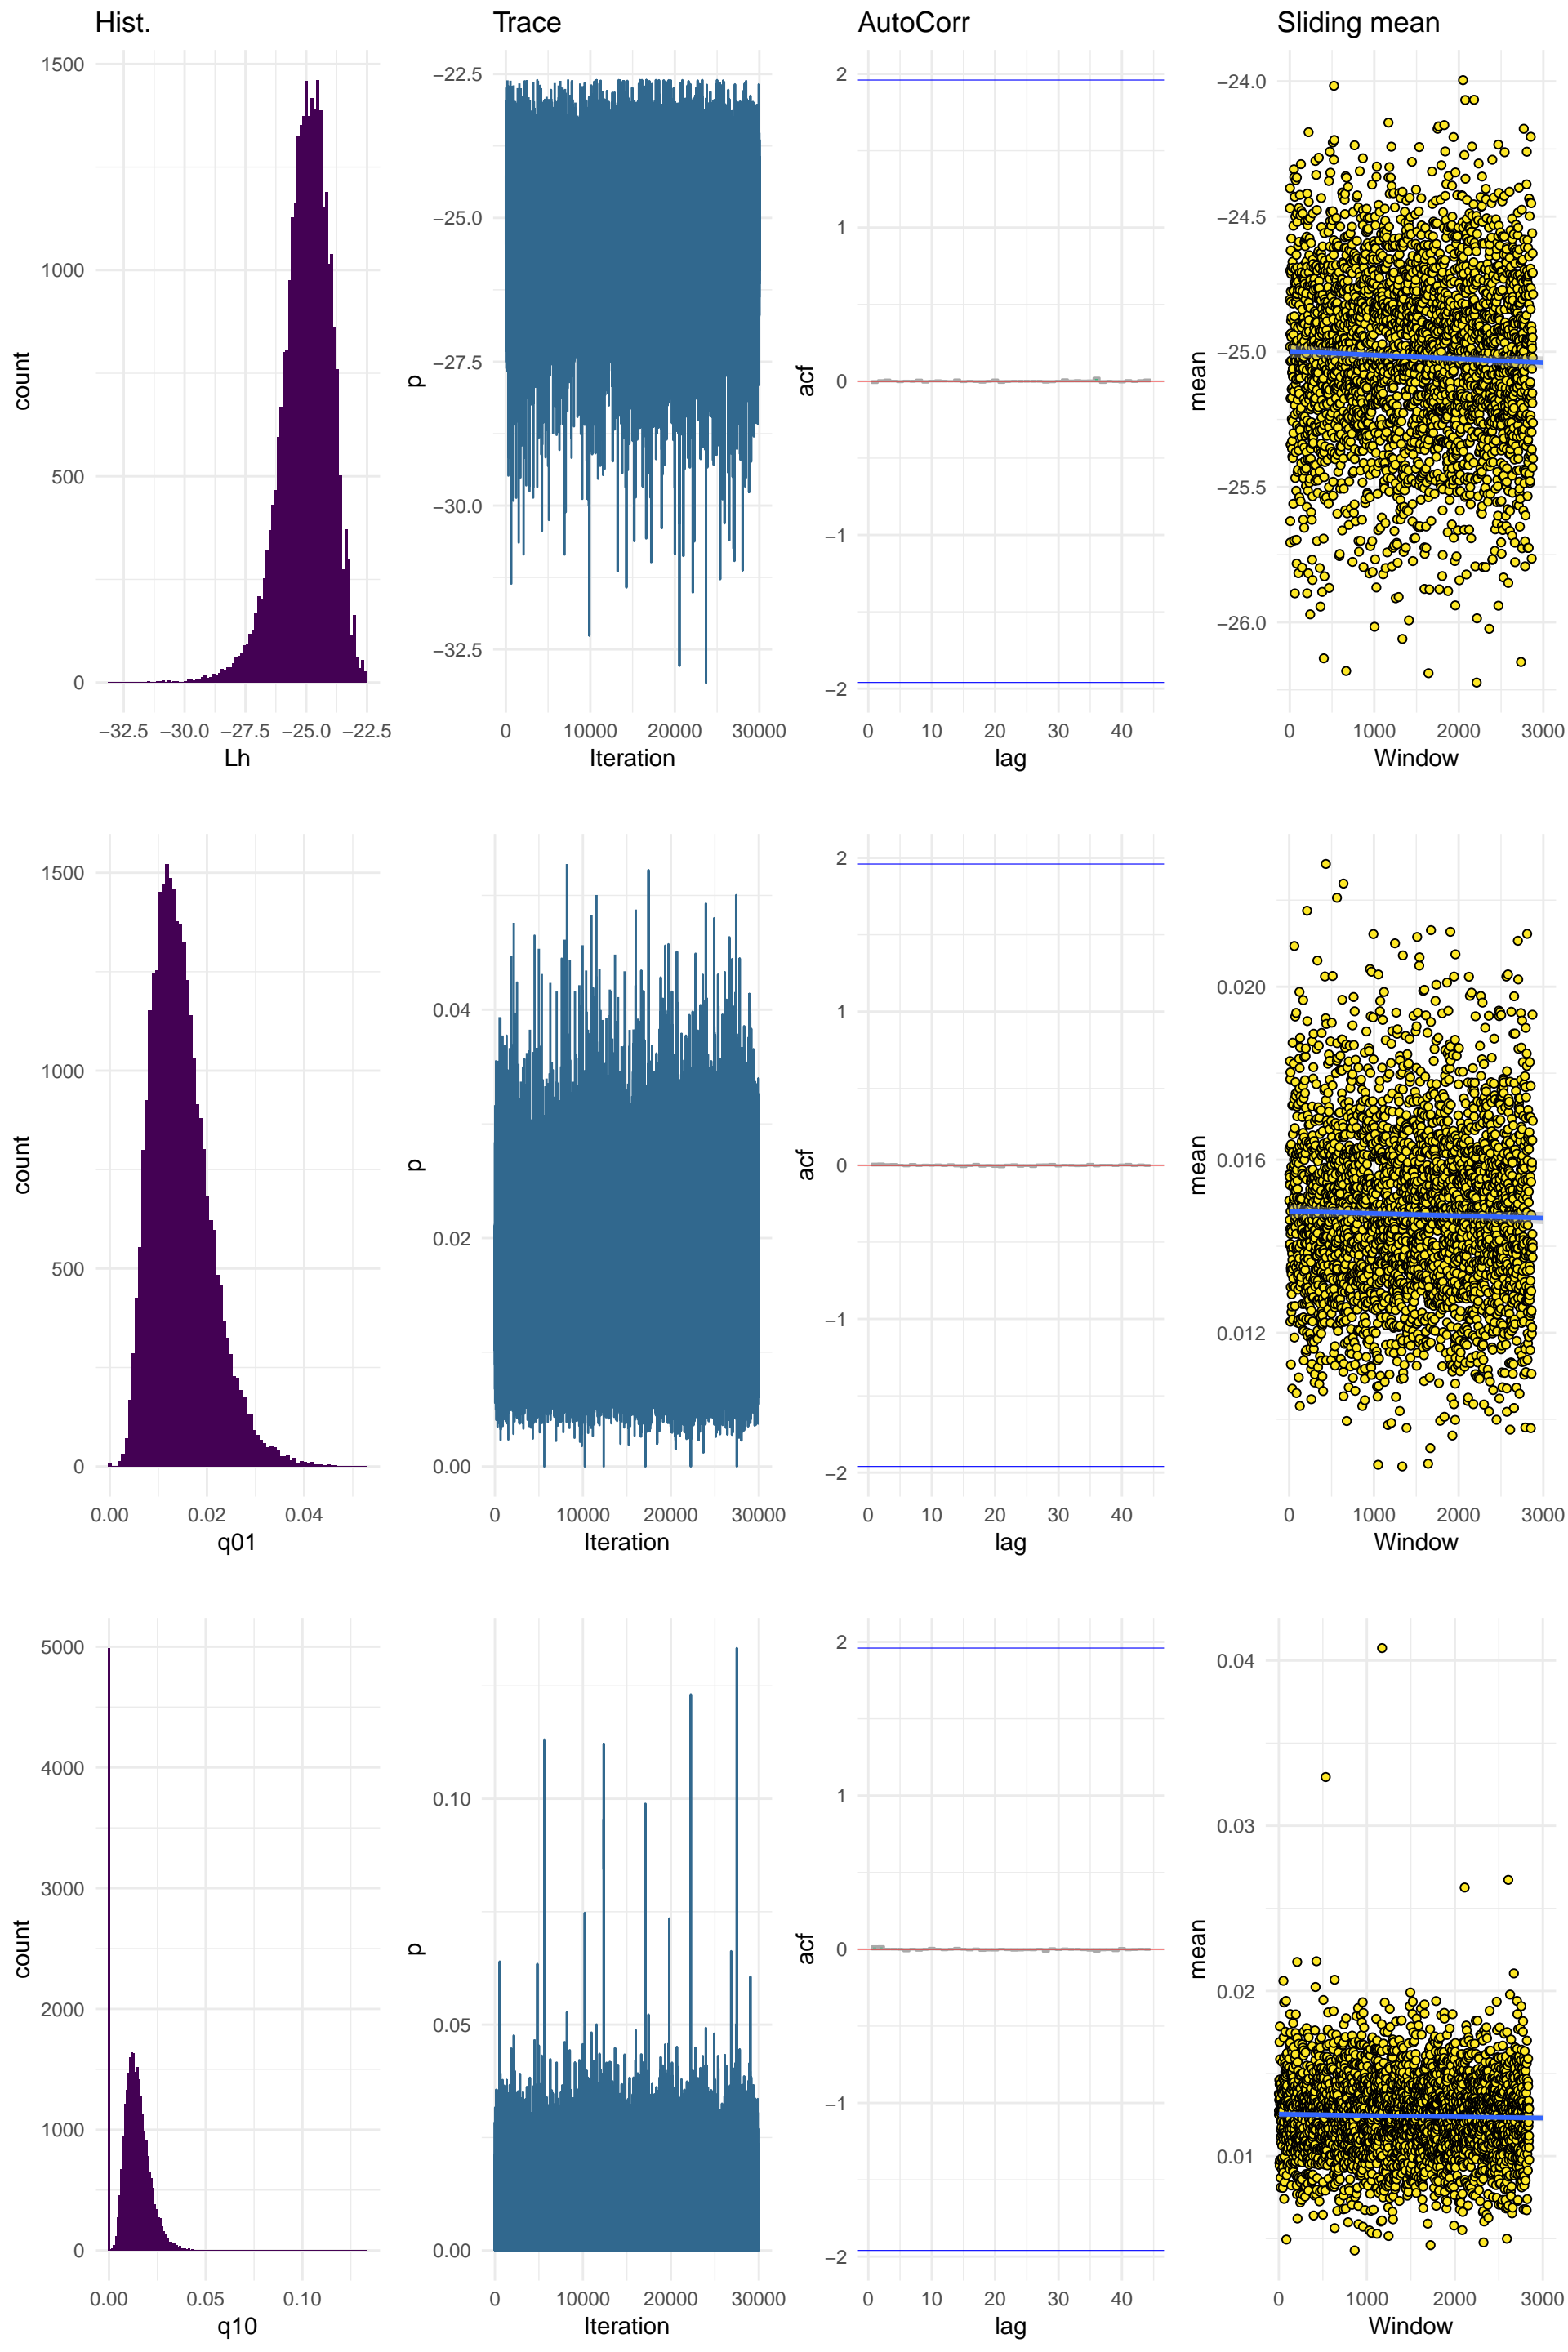

Hist.

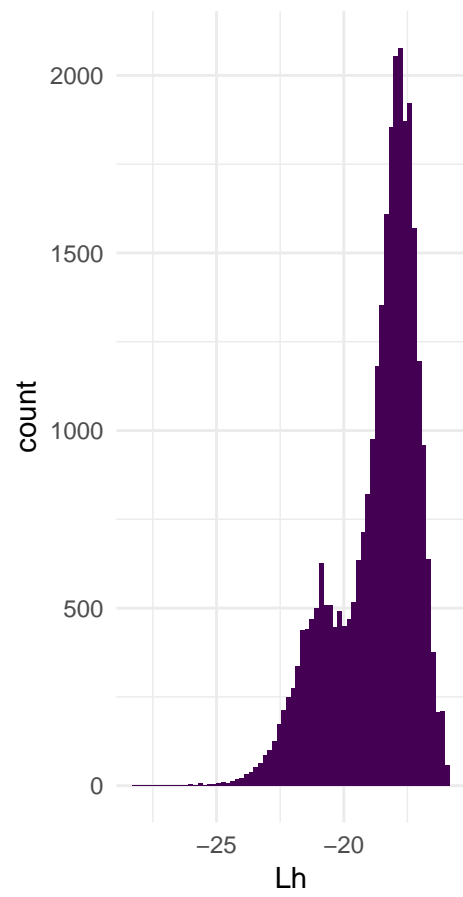

Trace

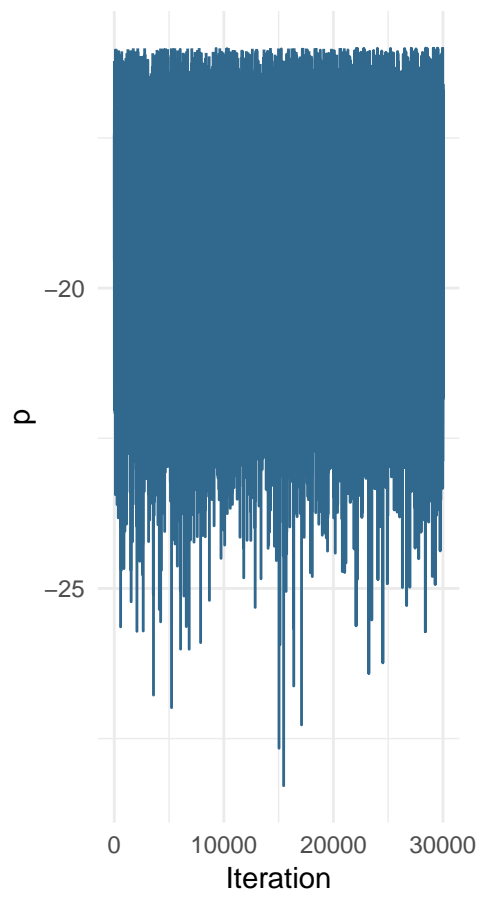

AutoCorr

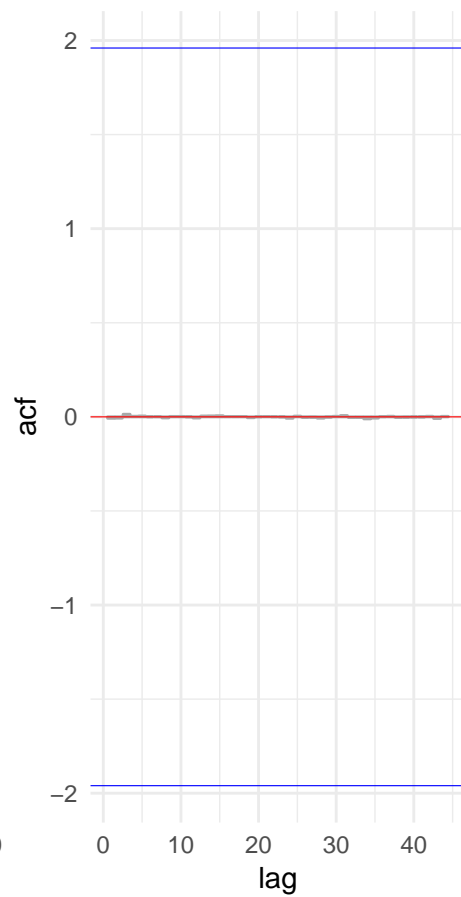

Sliding mean

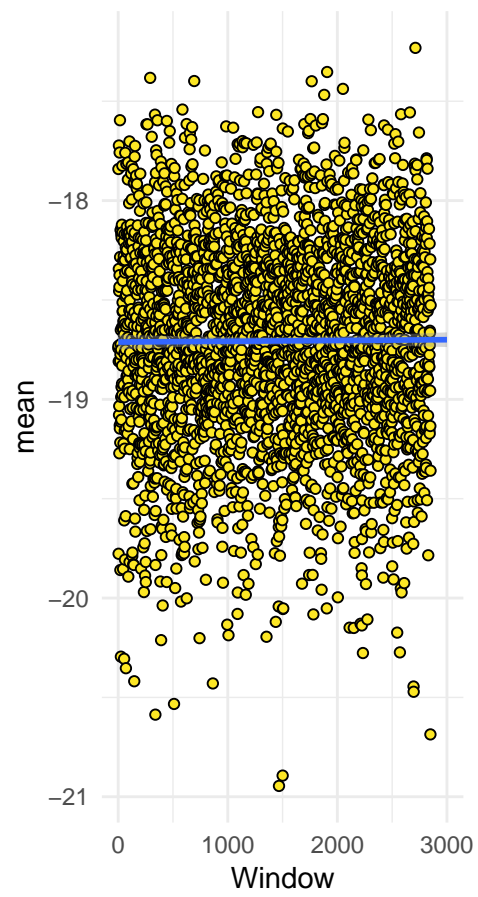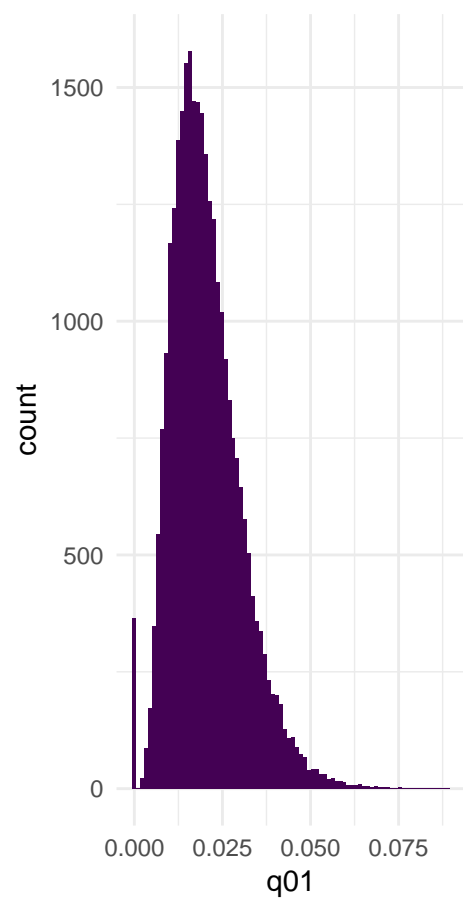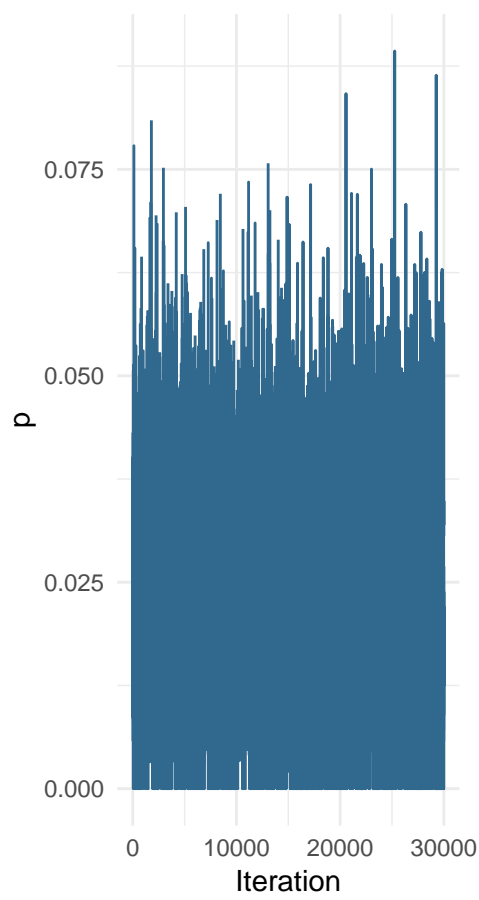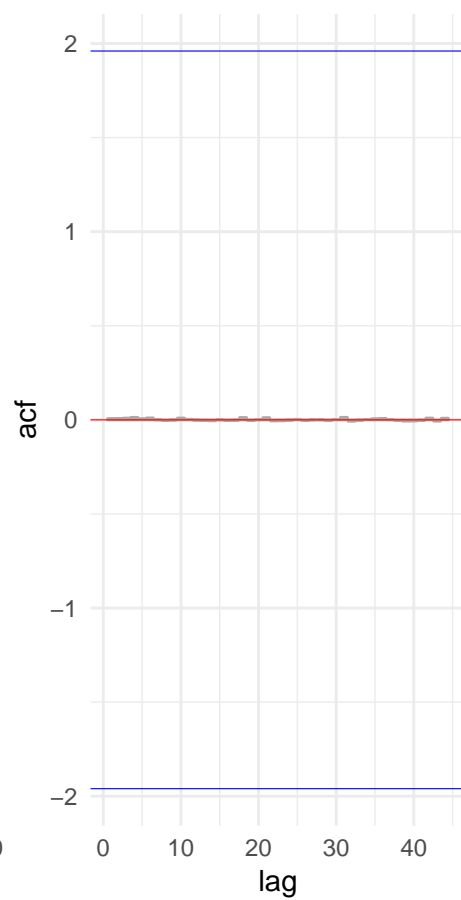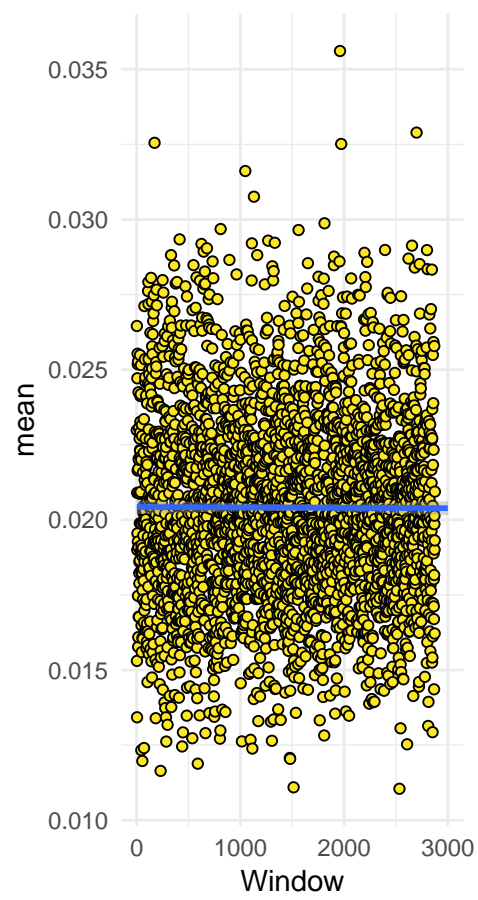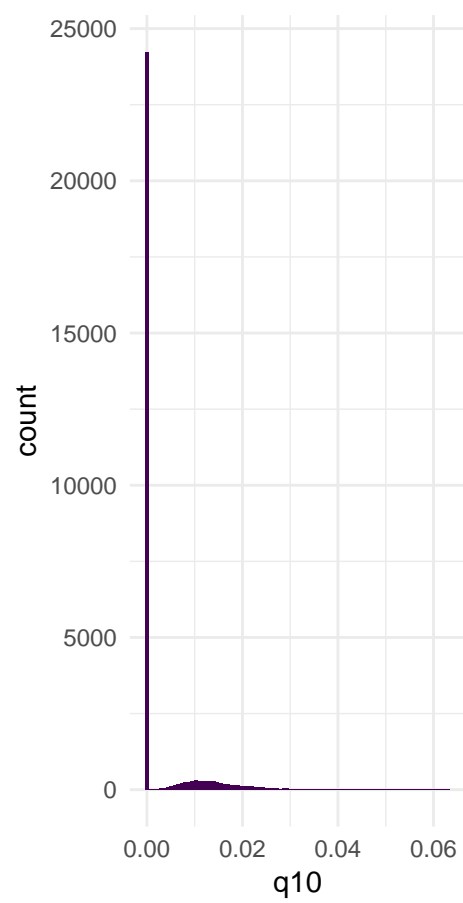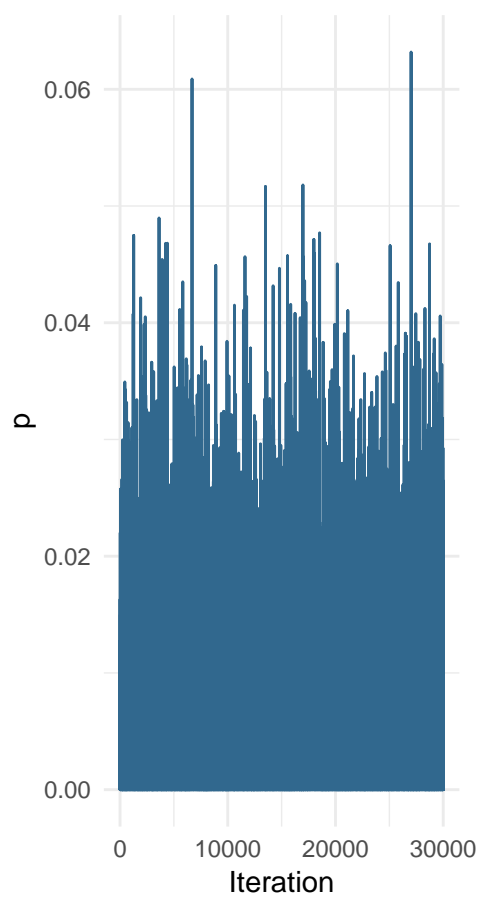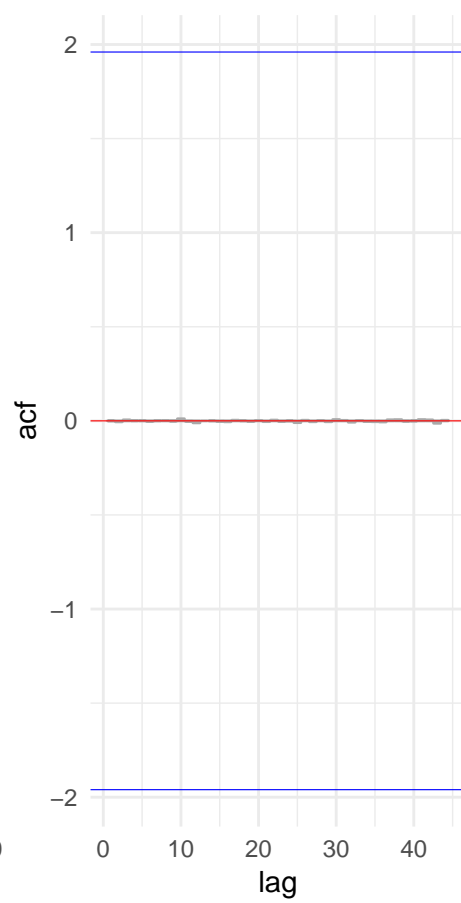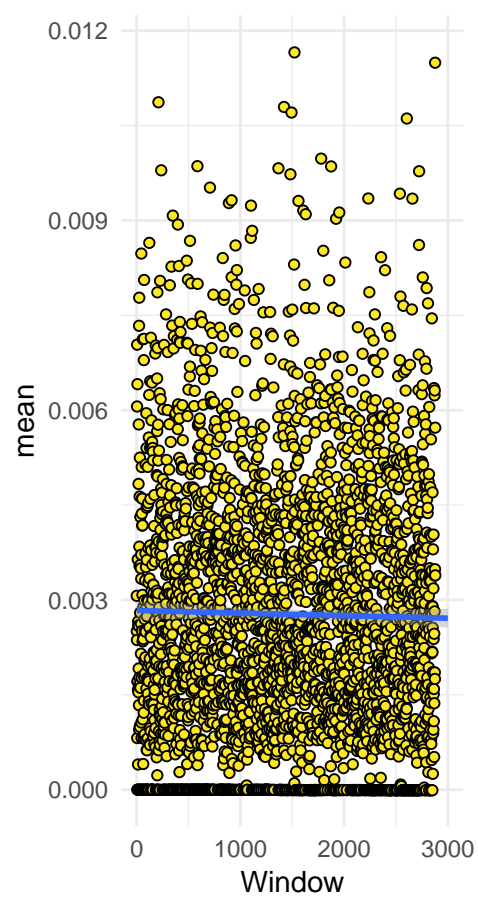

Hist.

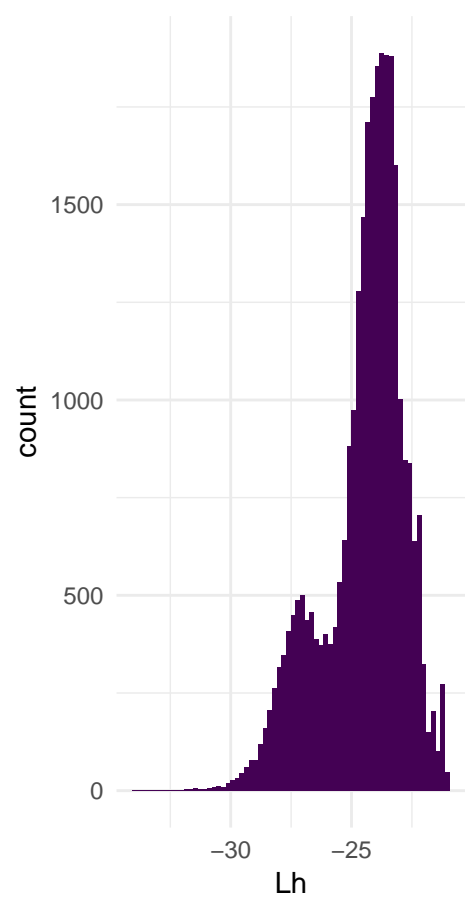

Trace

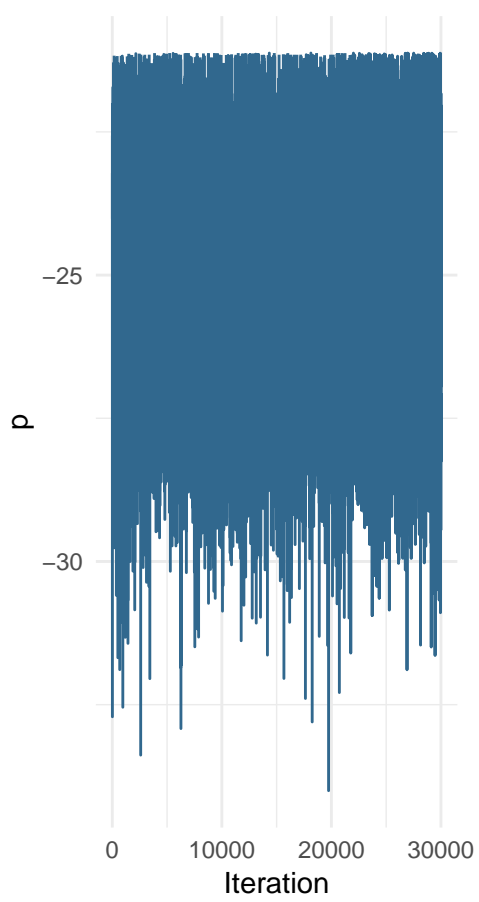

AutoCorr

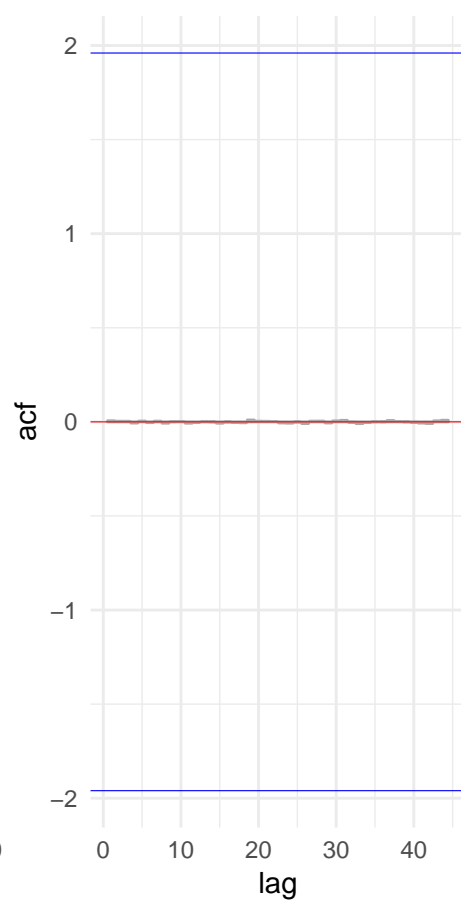

Sliding mean

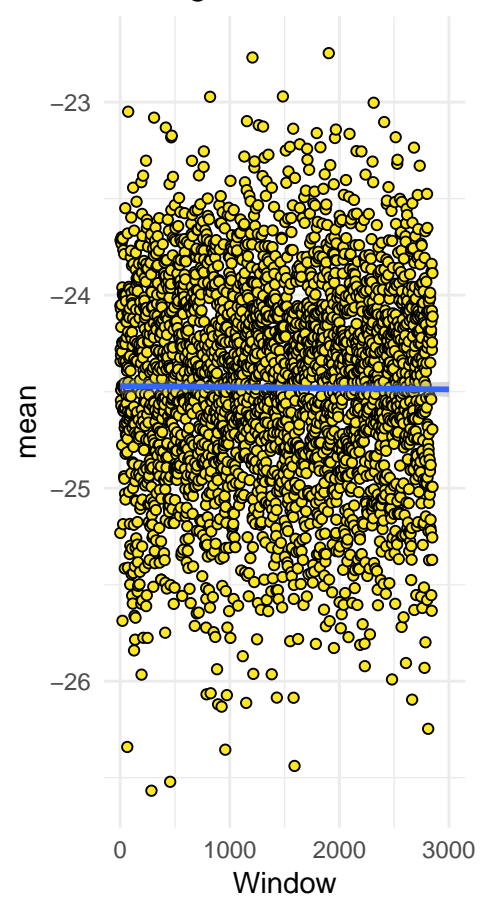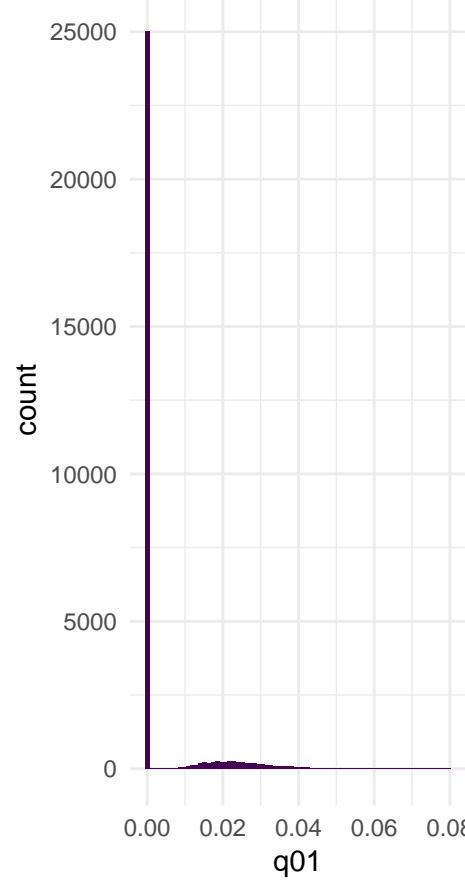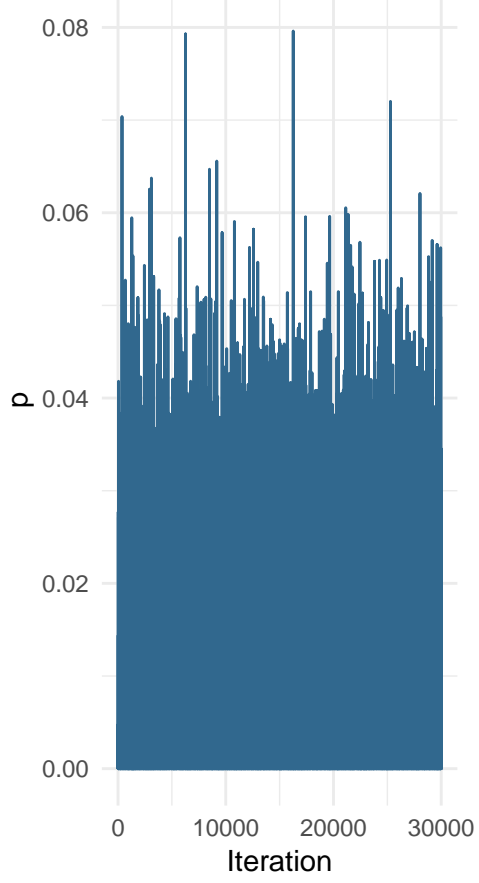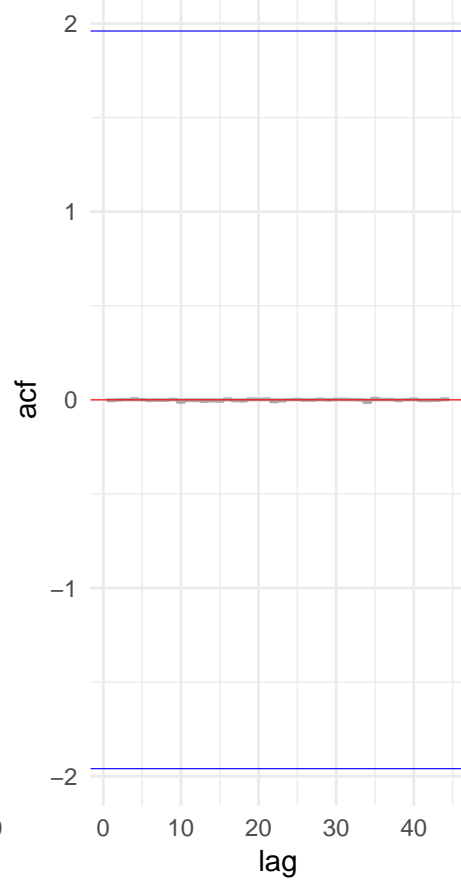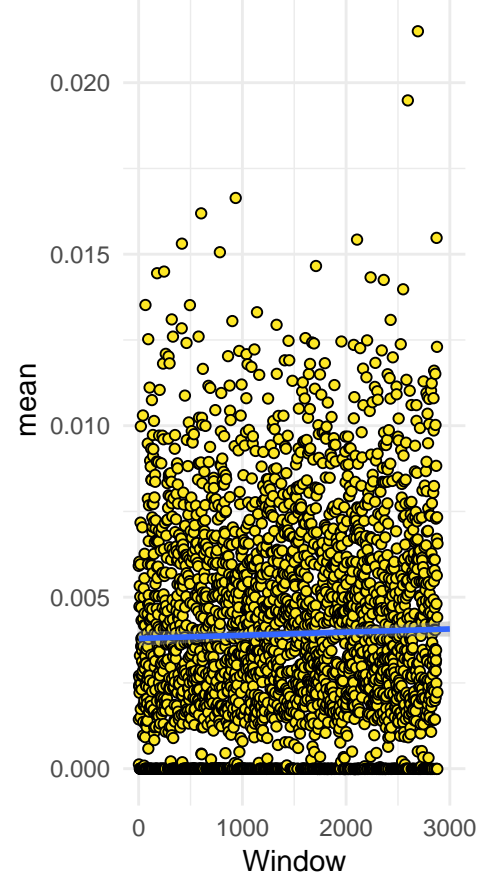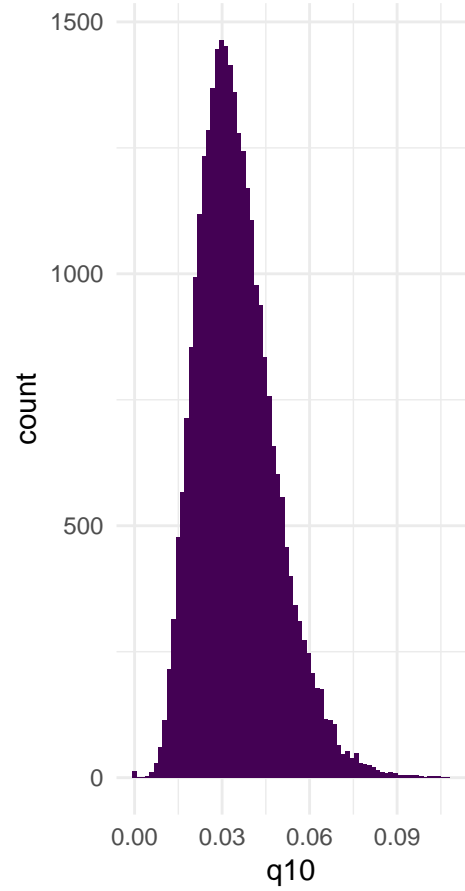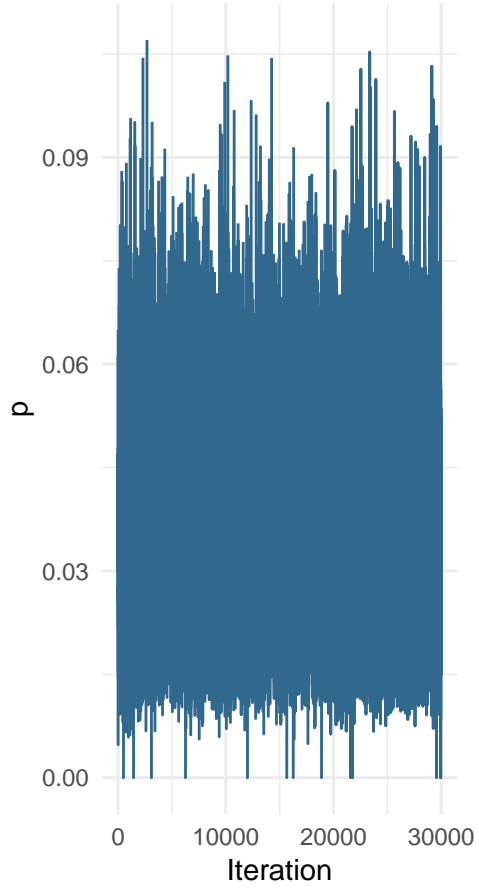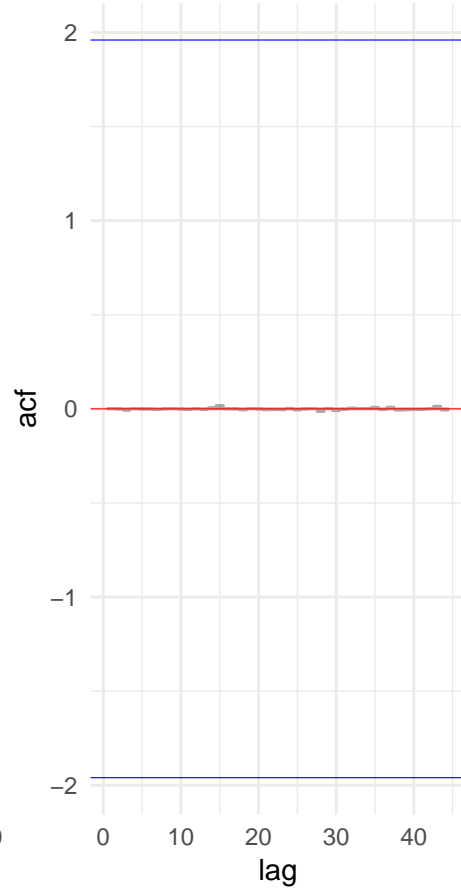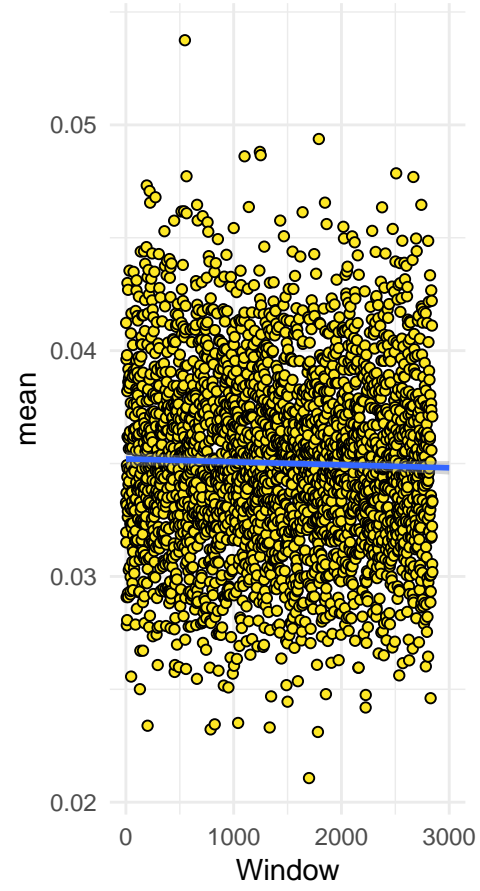

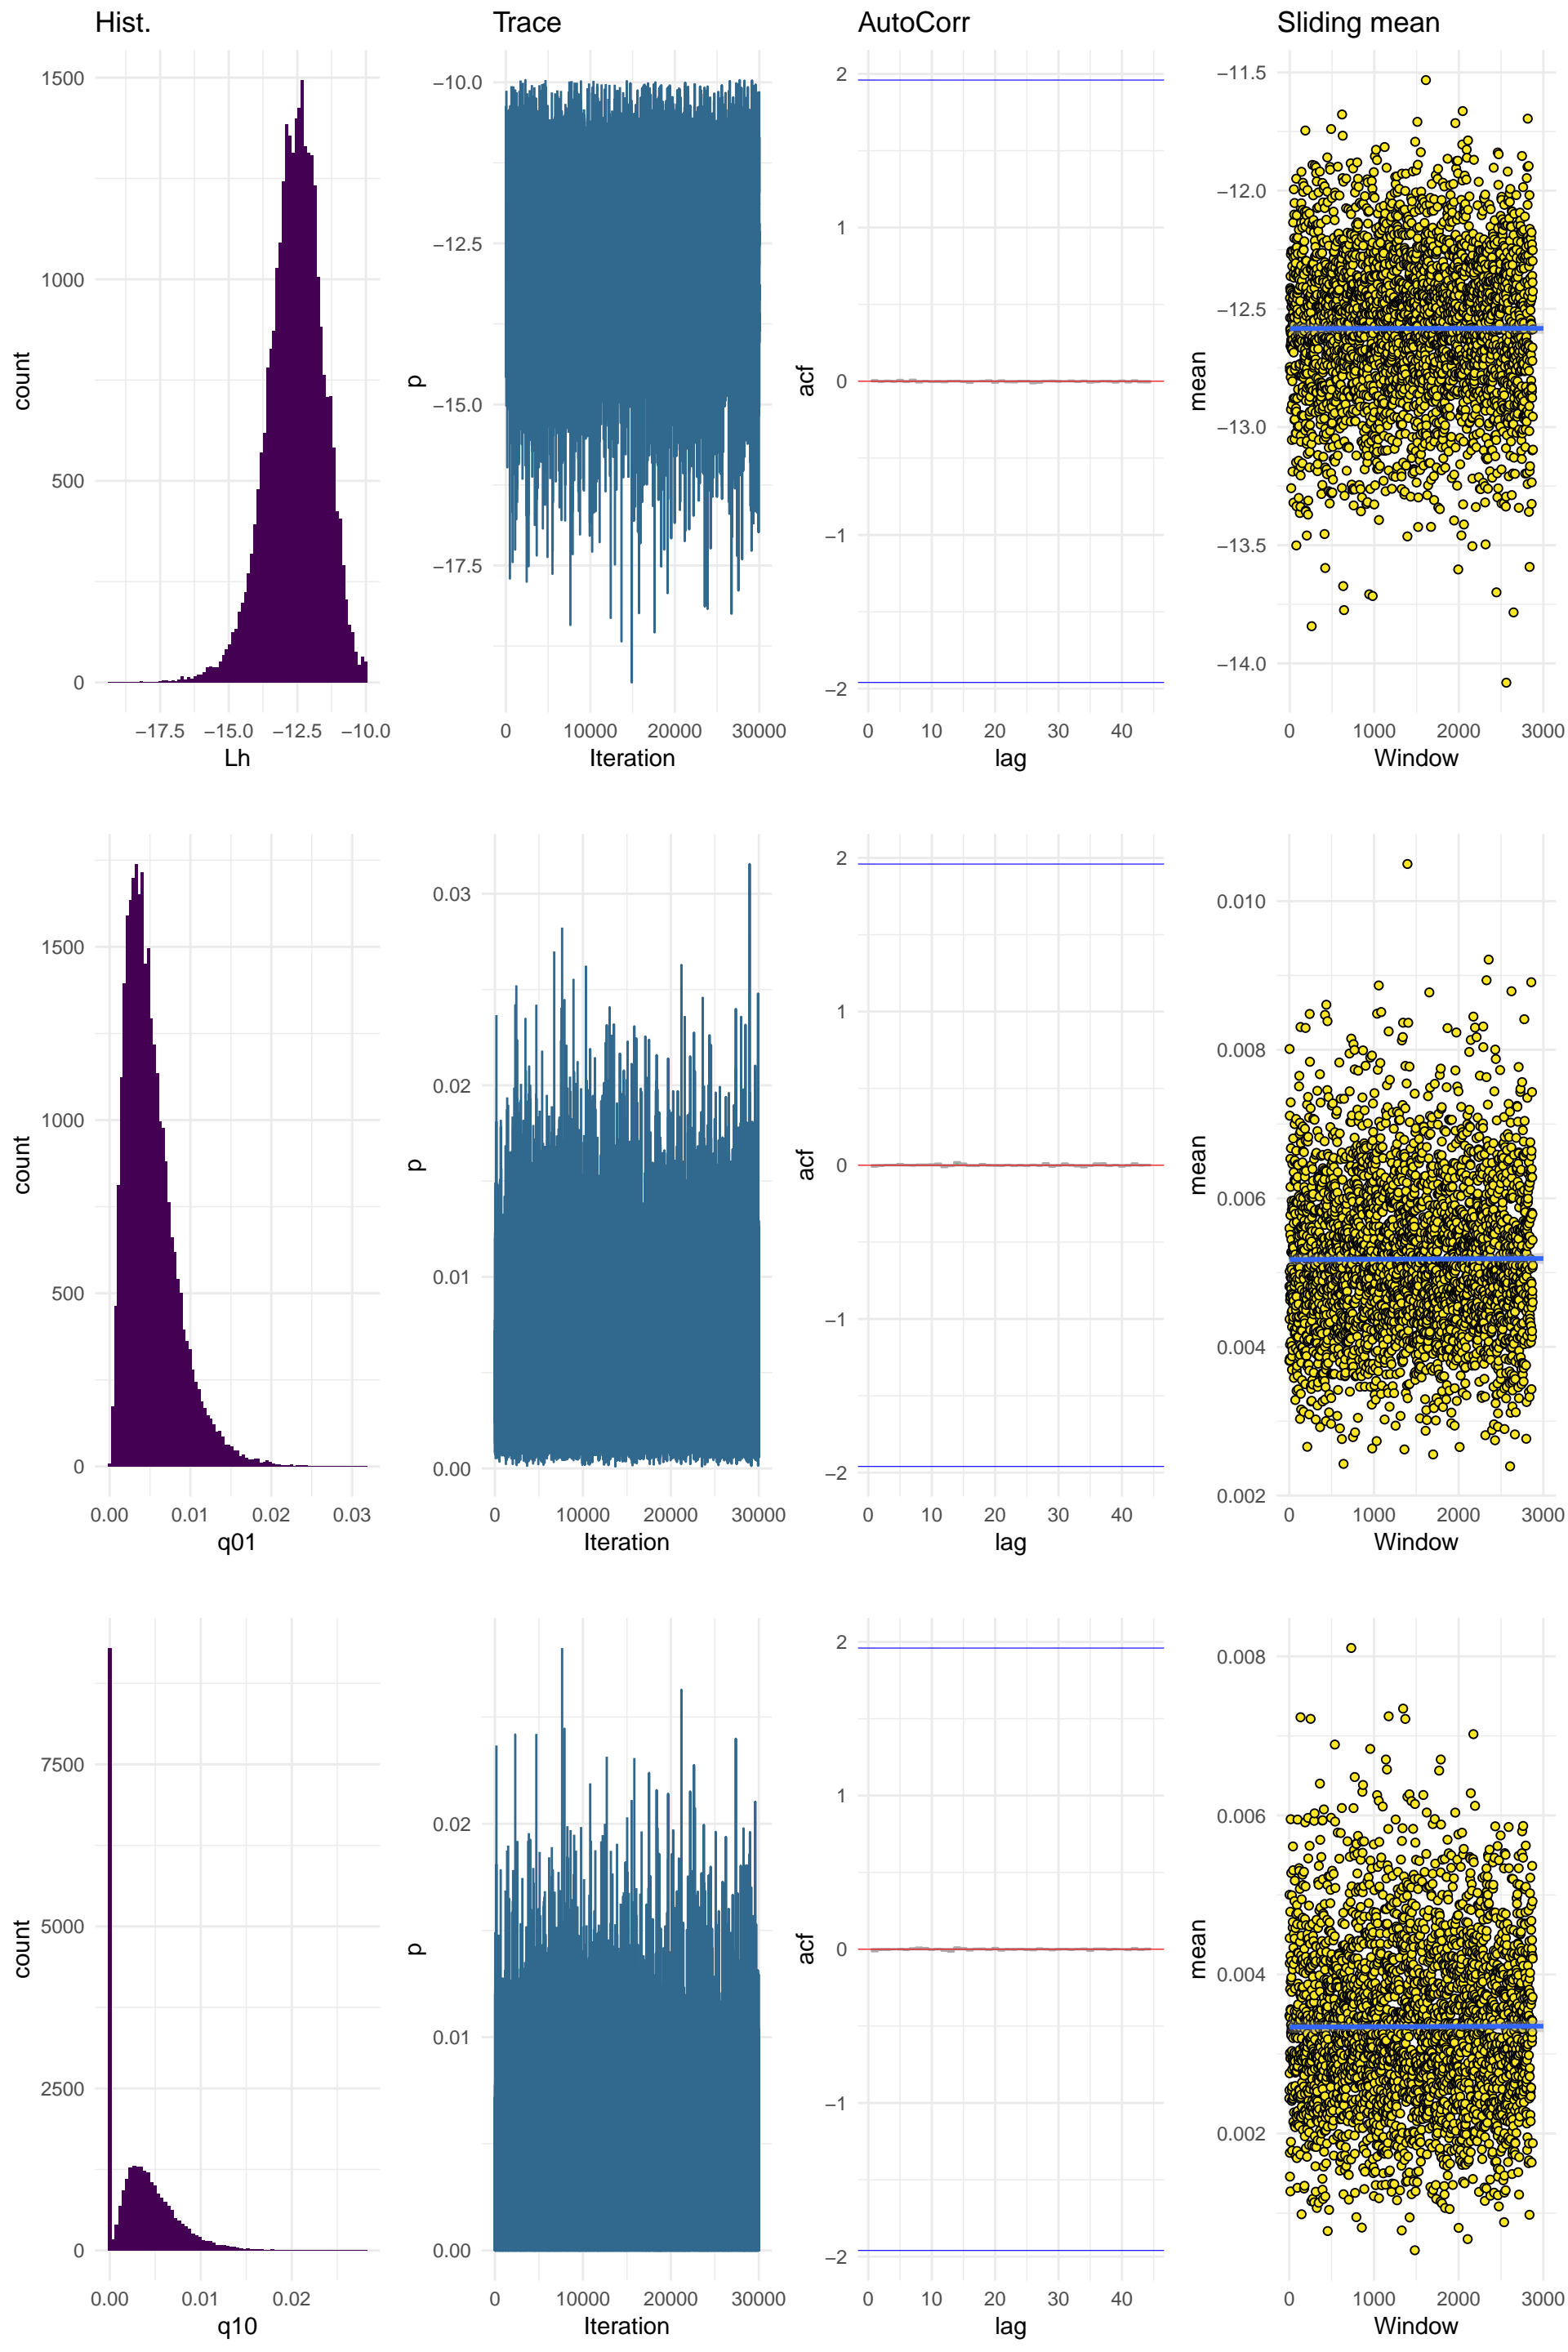

Hist.

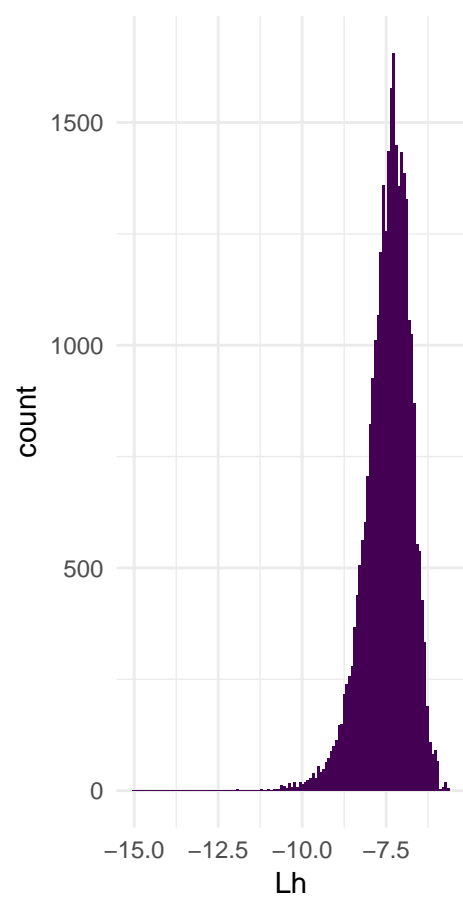

Trace

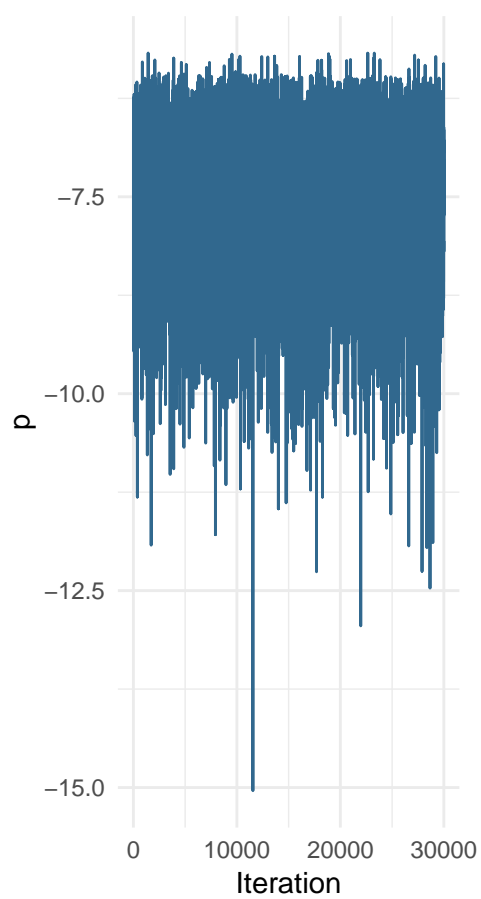

AutoCorr

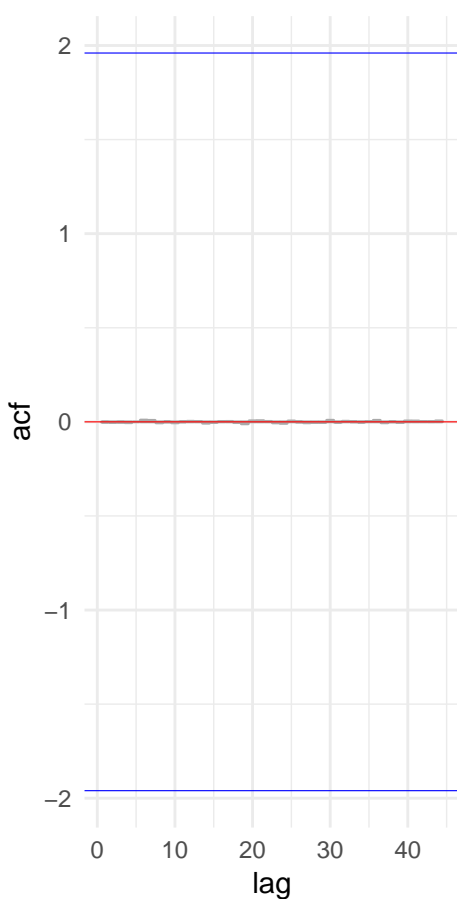

Sliding mean

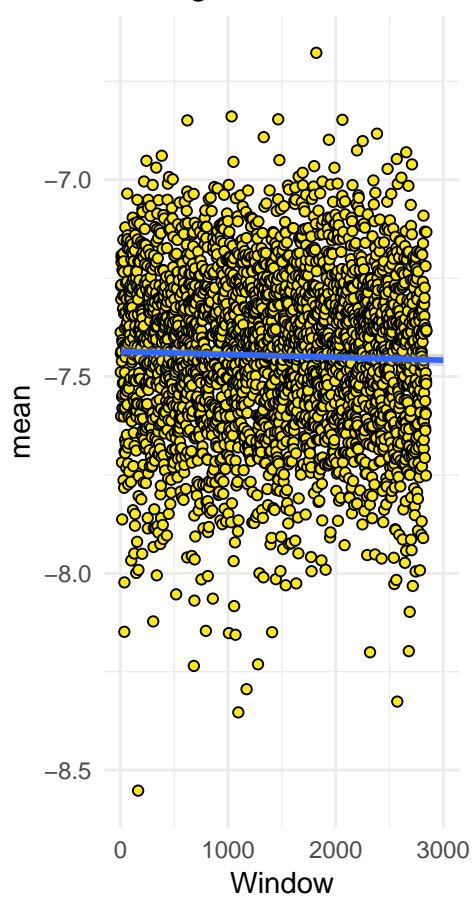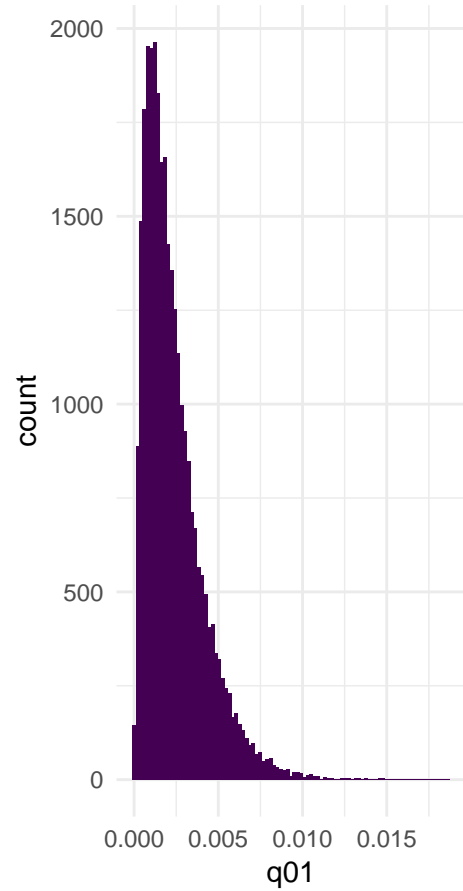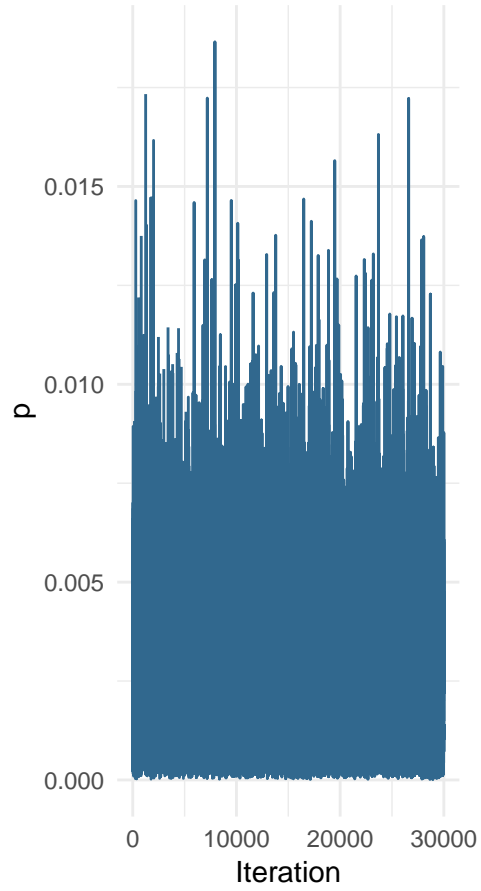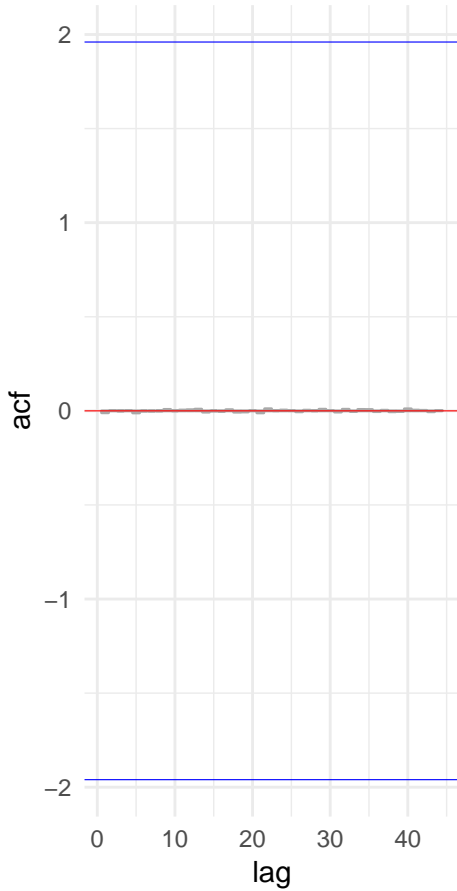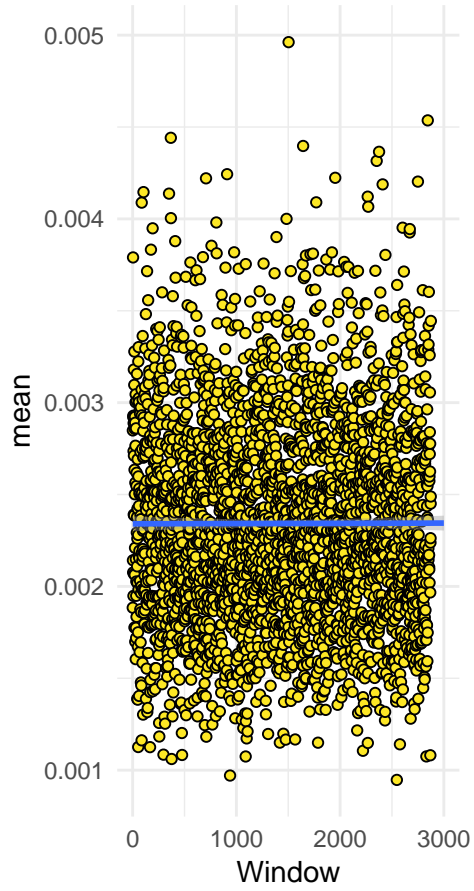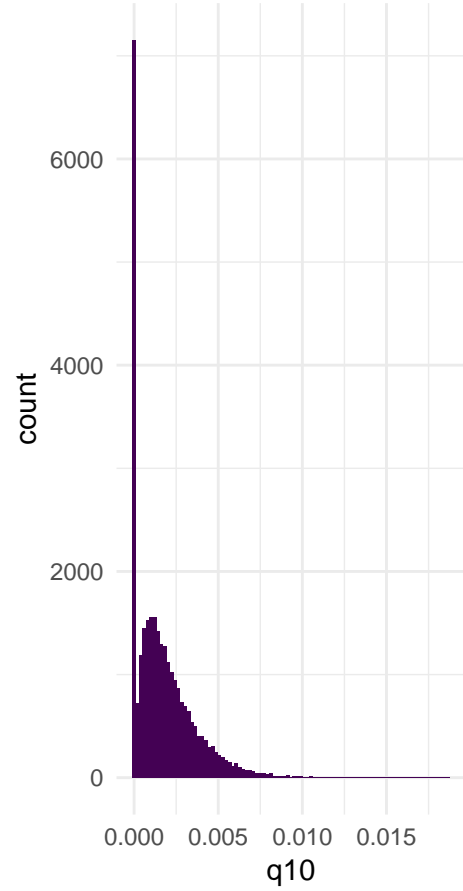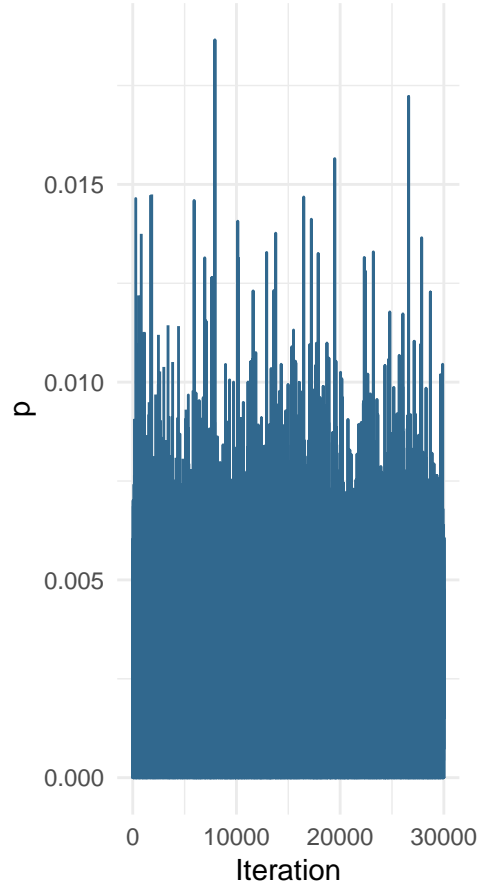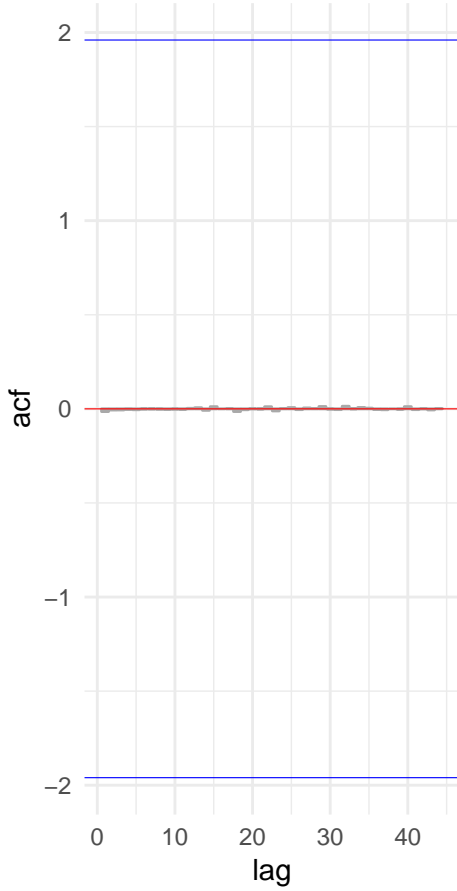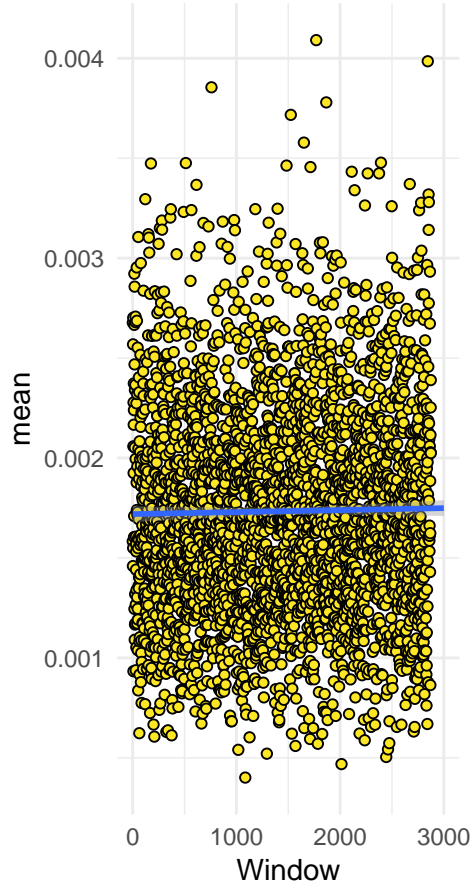

Hist.

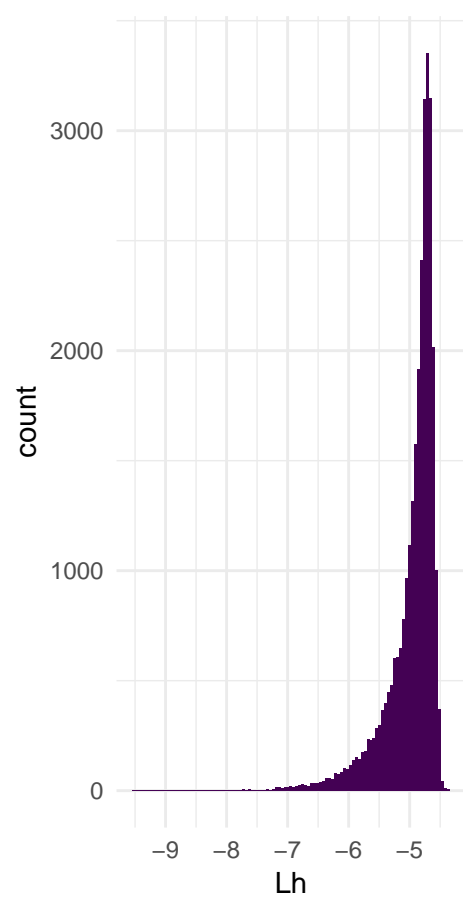

Trace

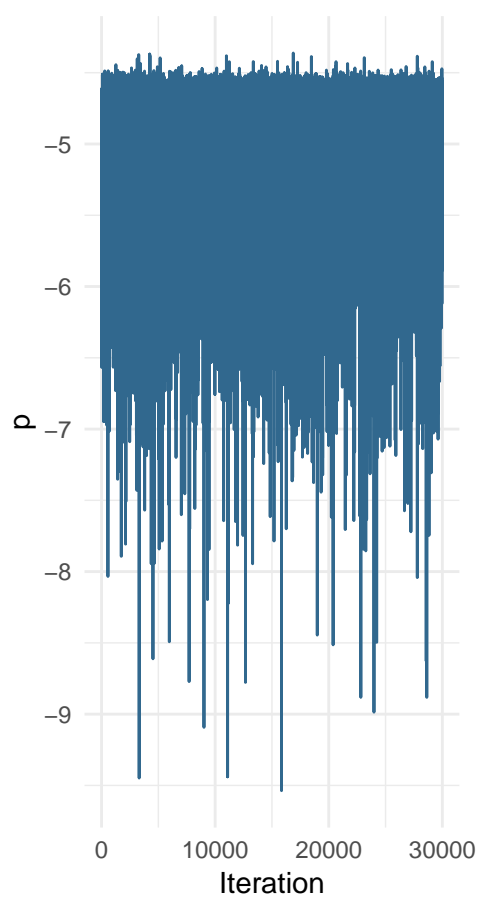

AutoCorr

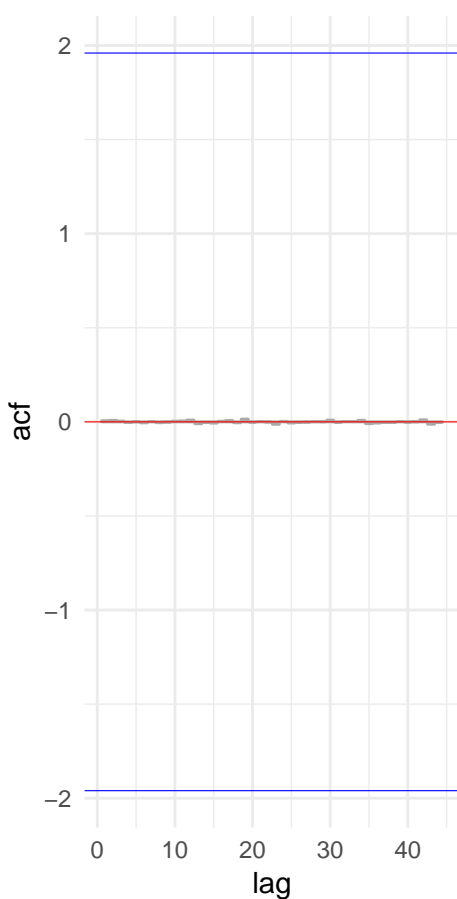

Sliding mean

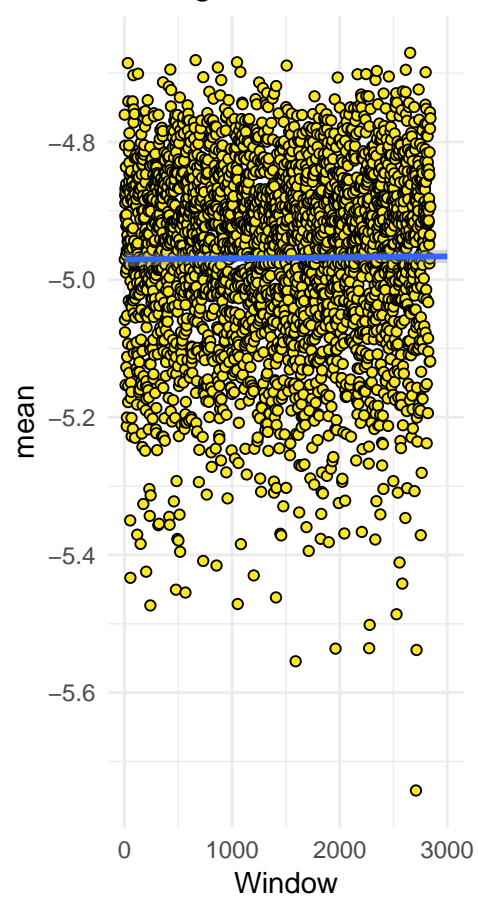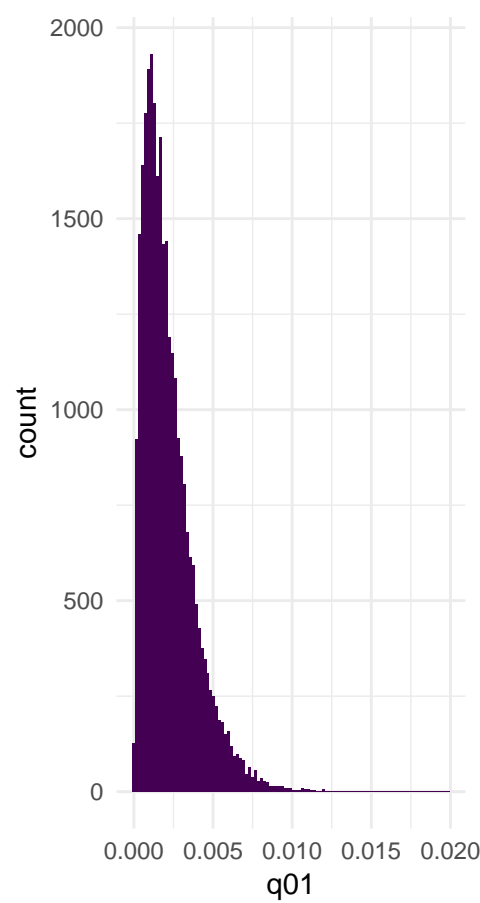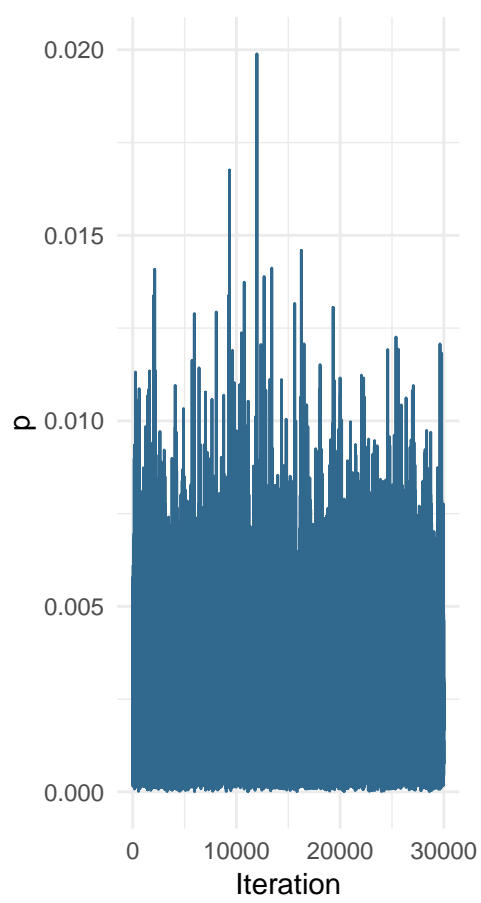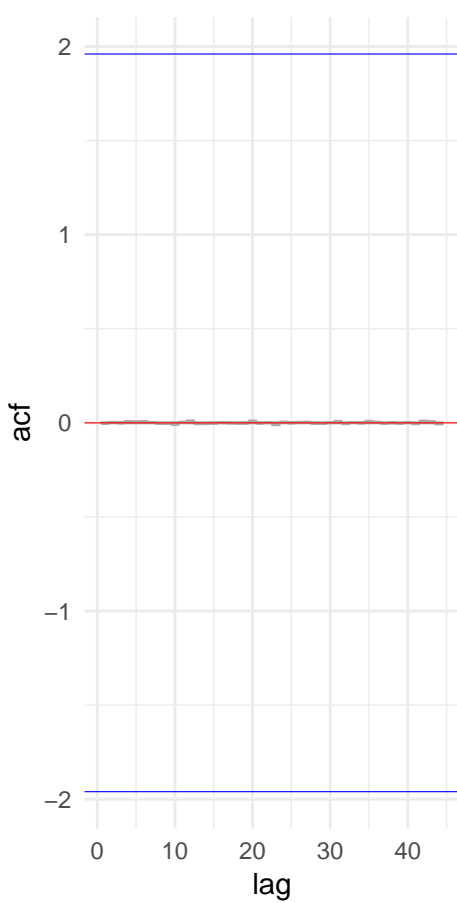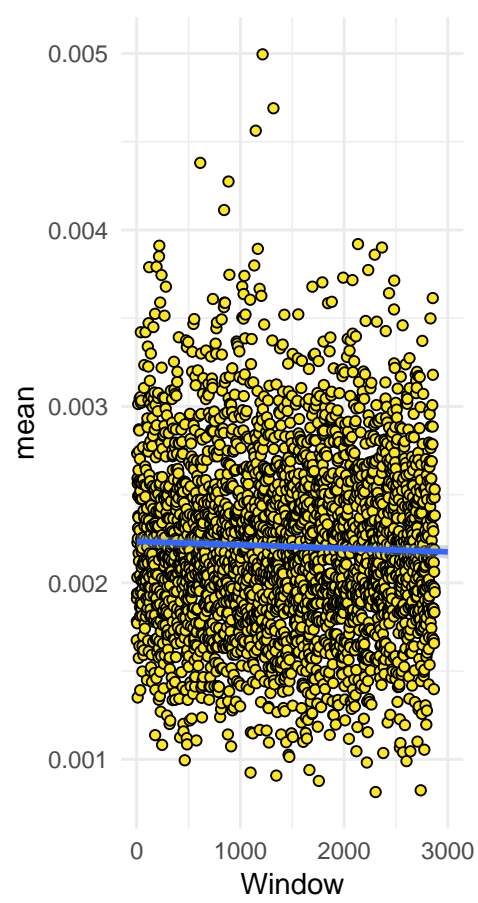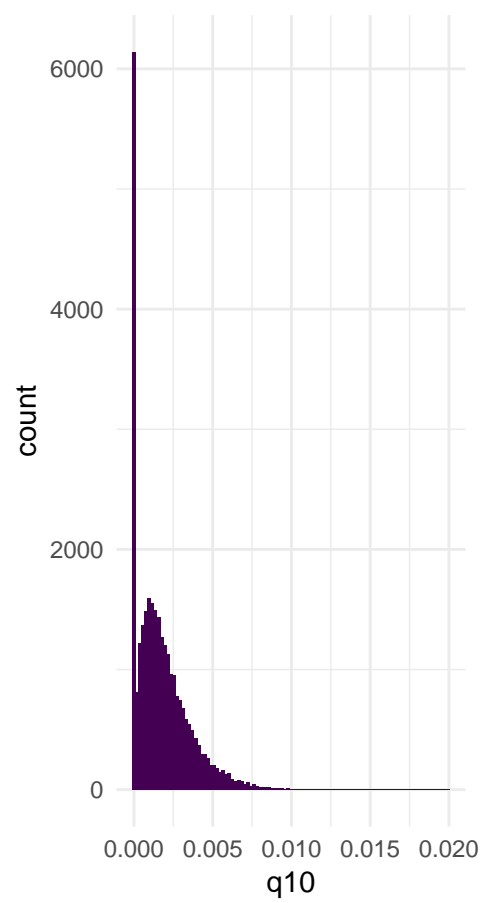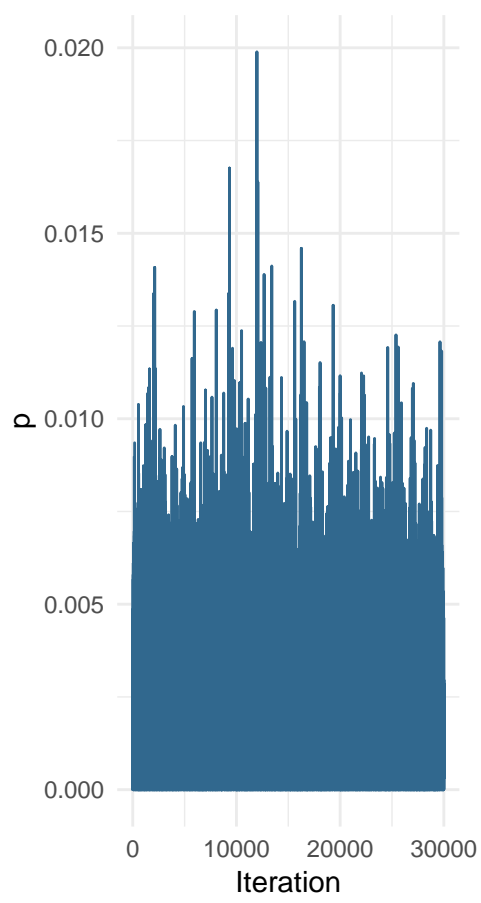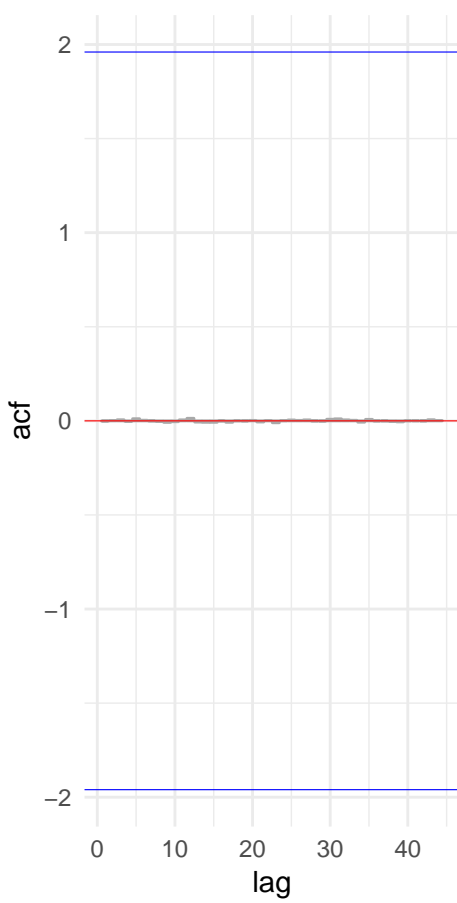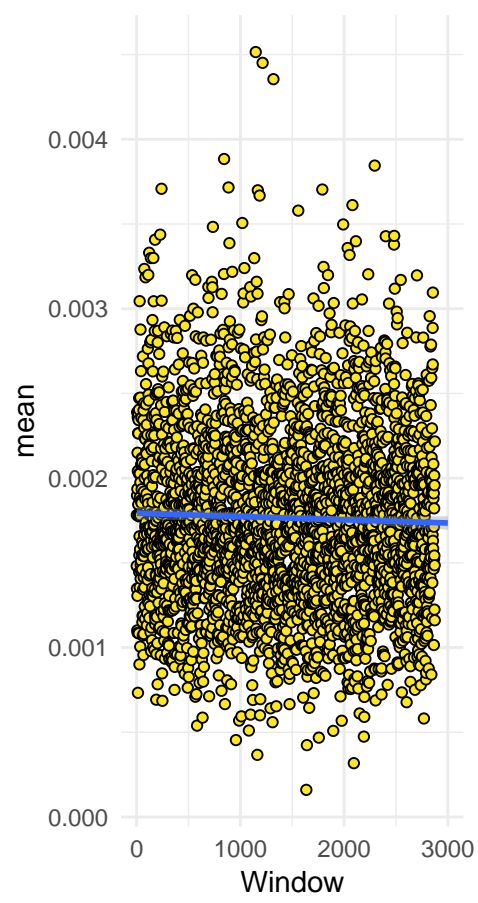

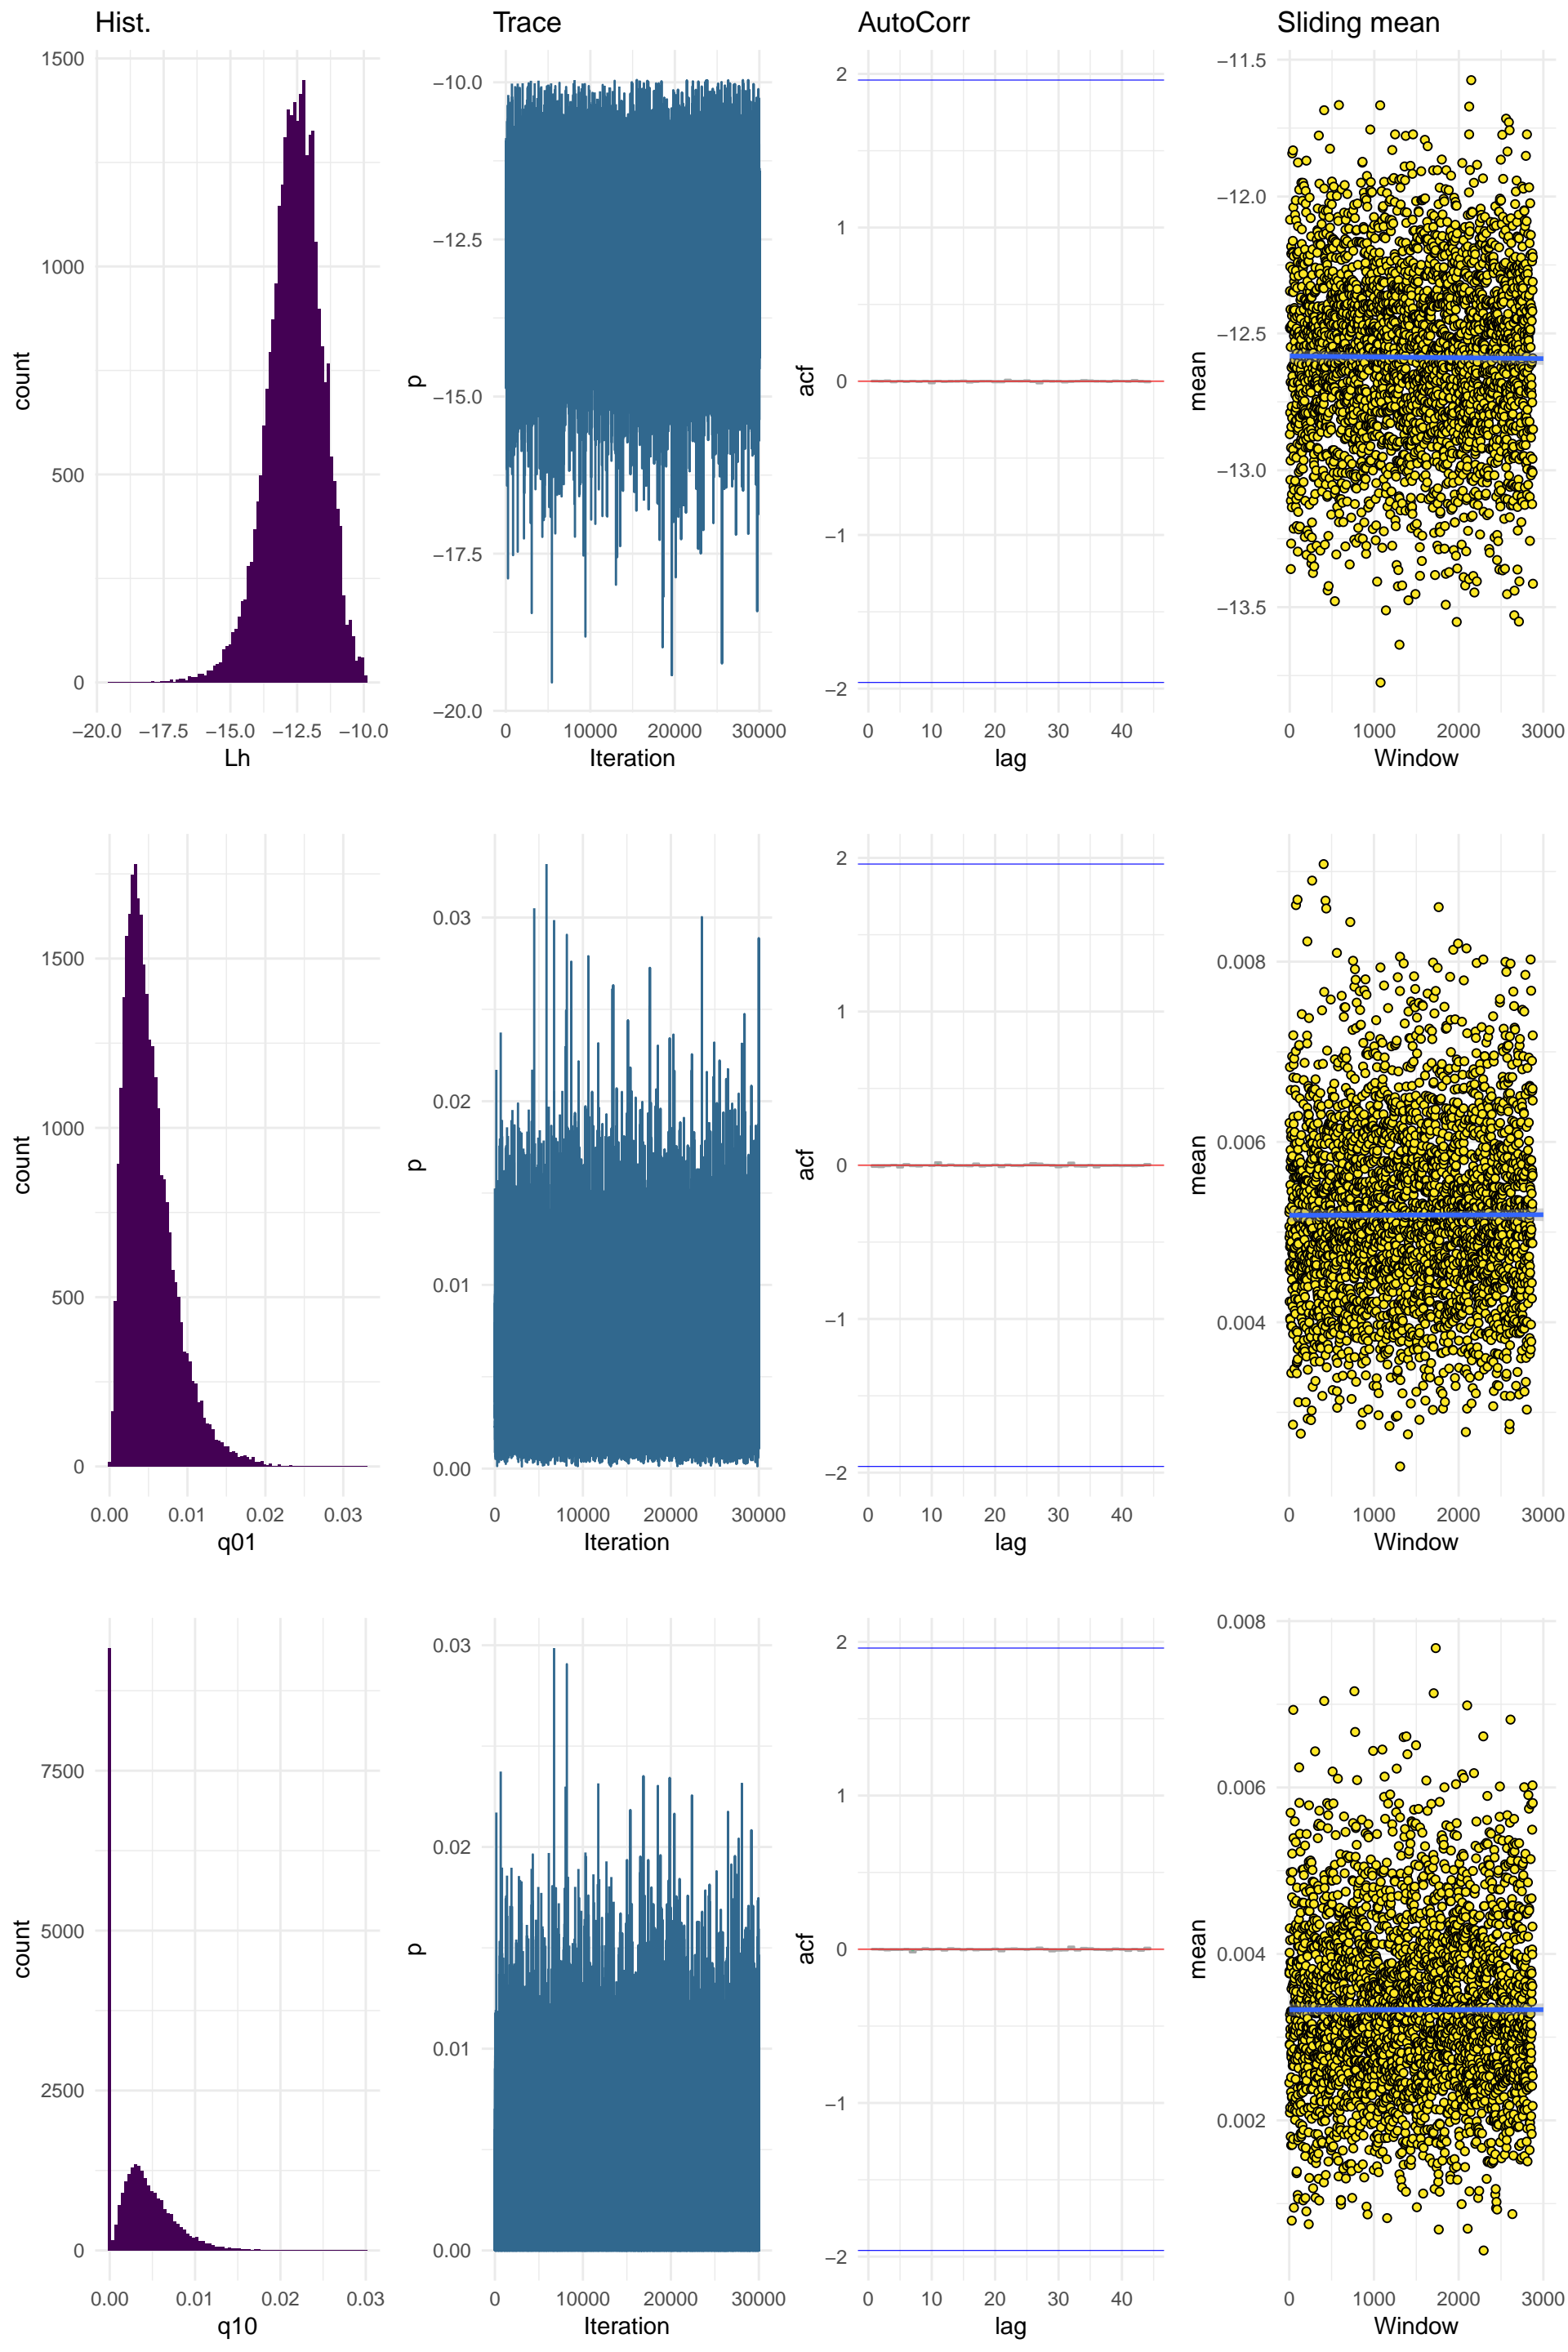



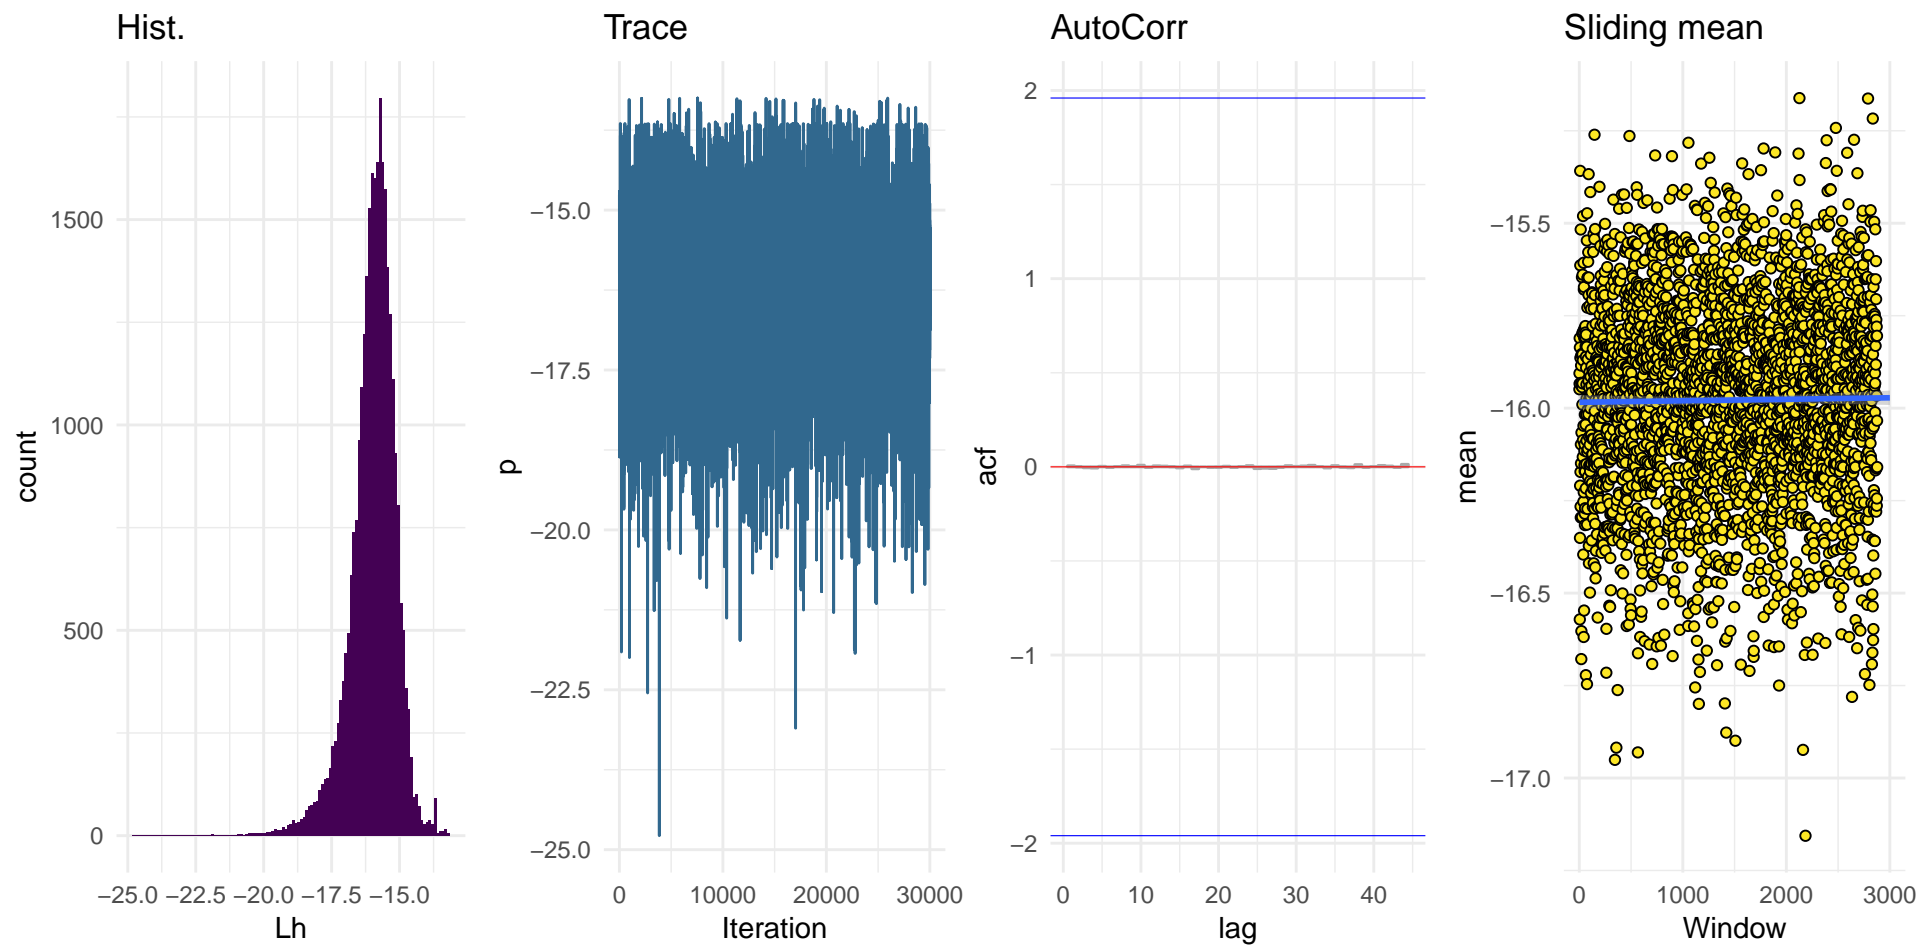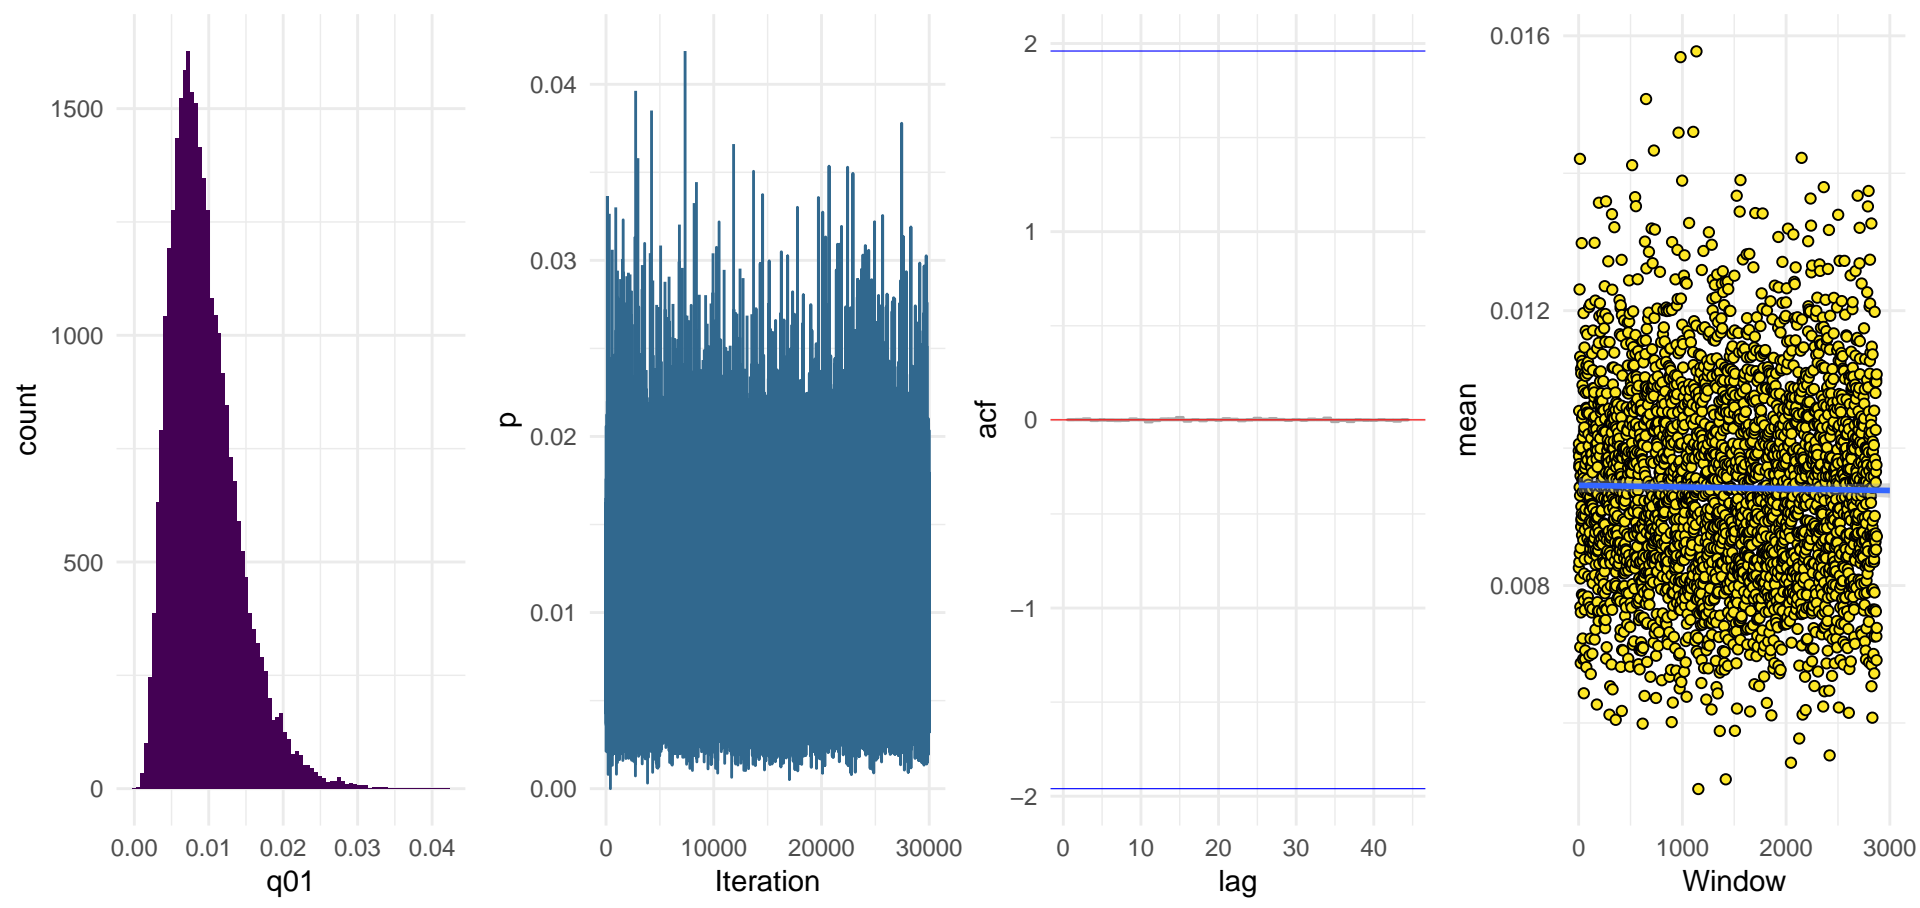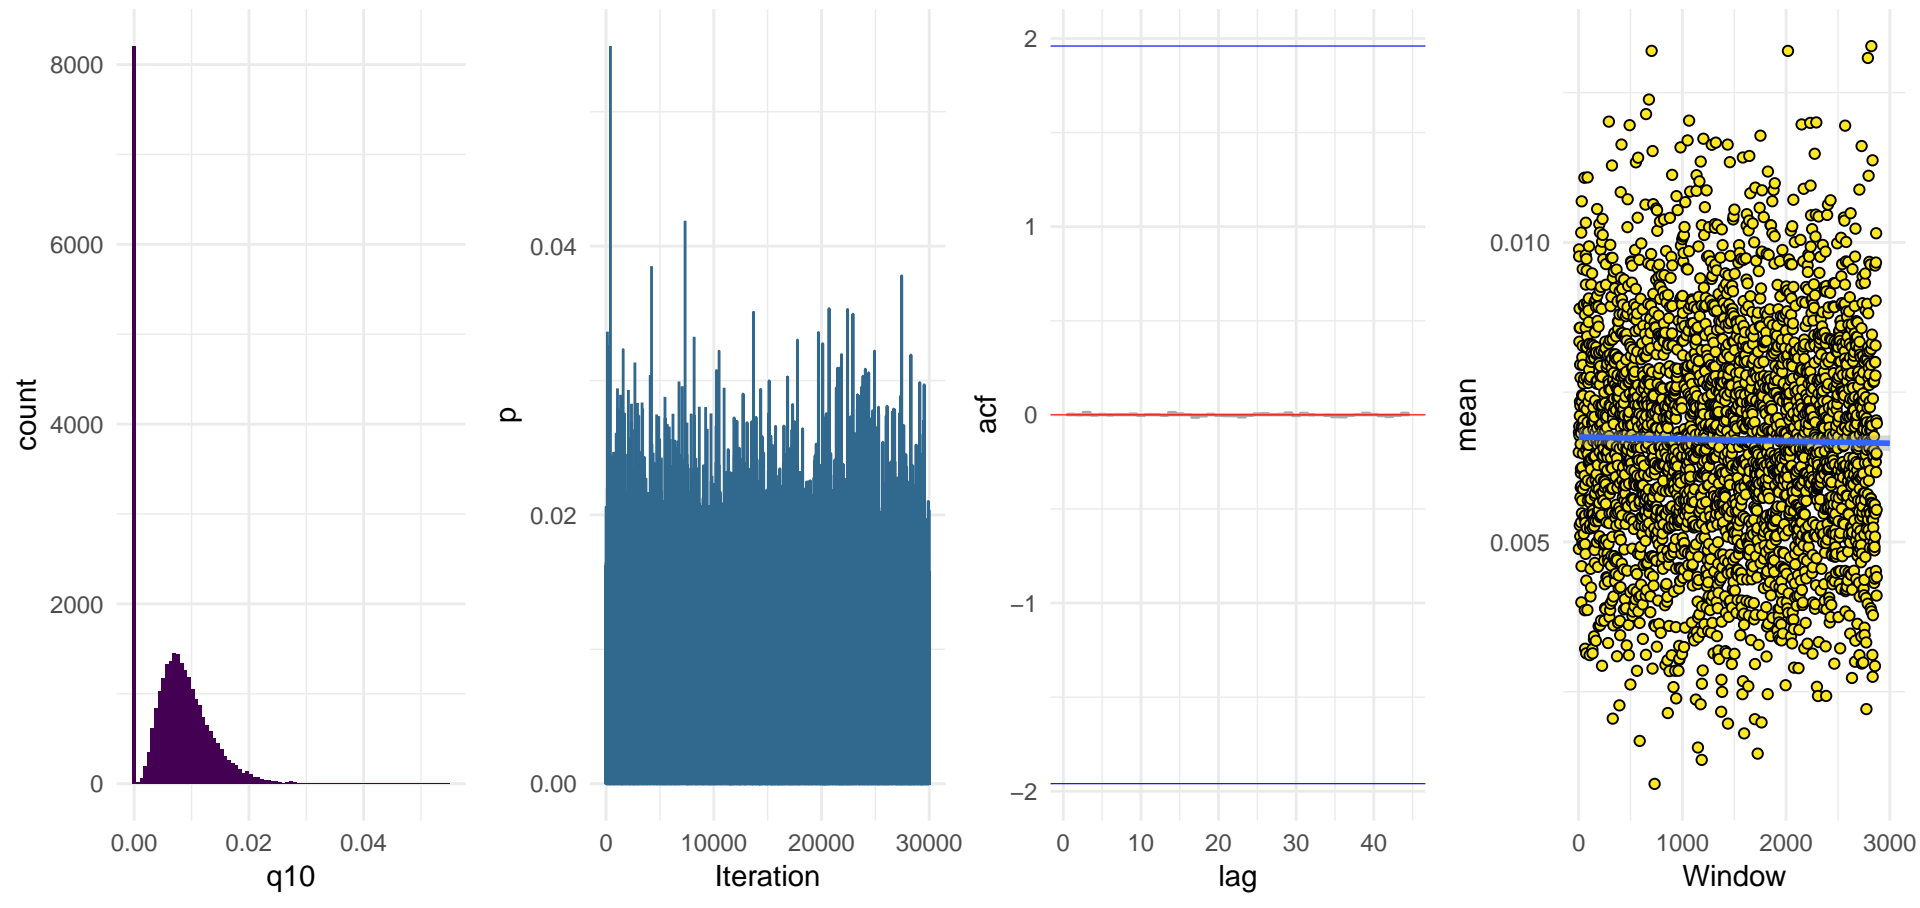

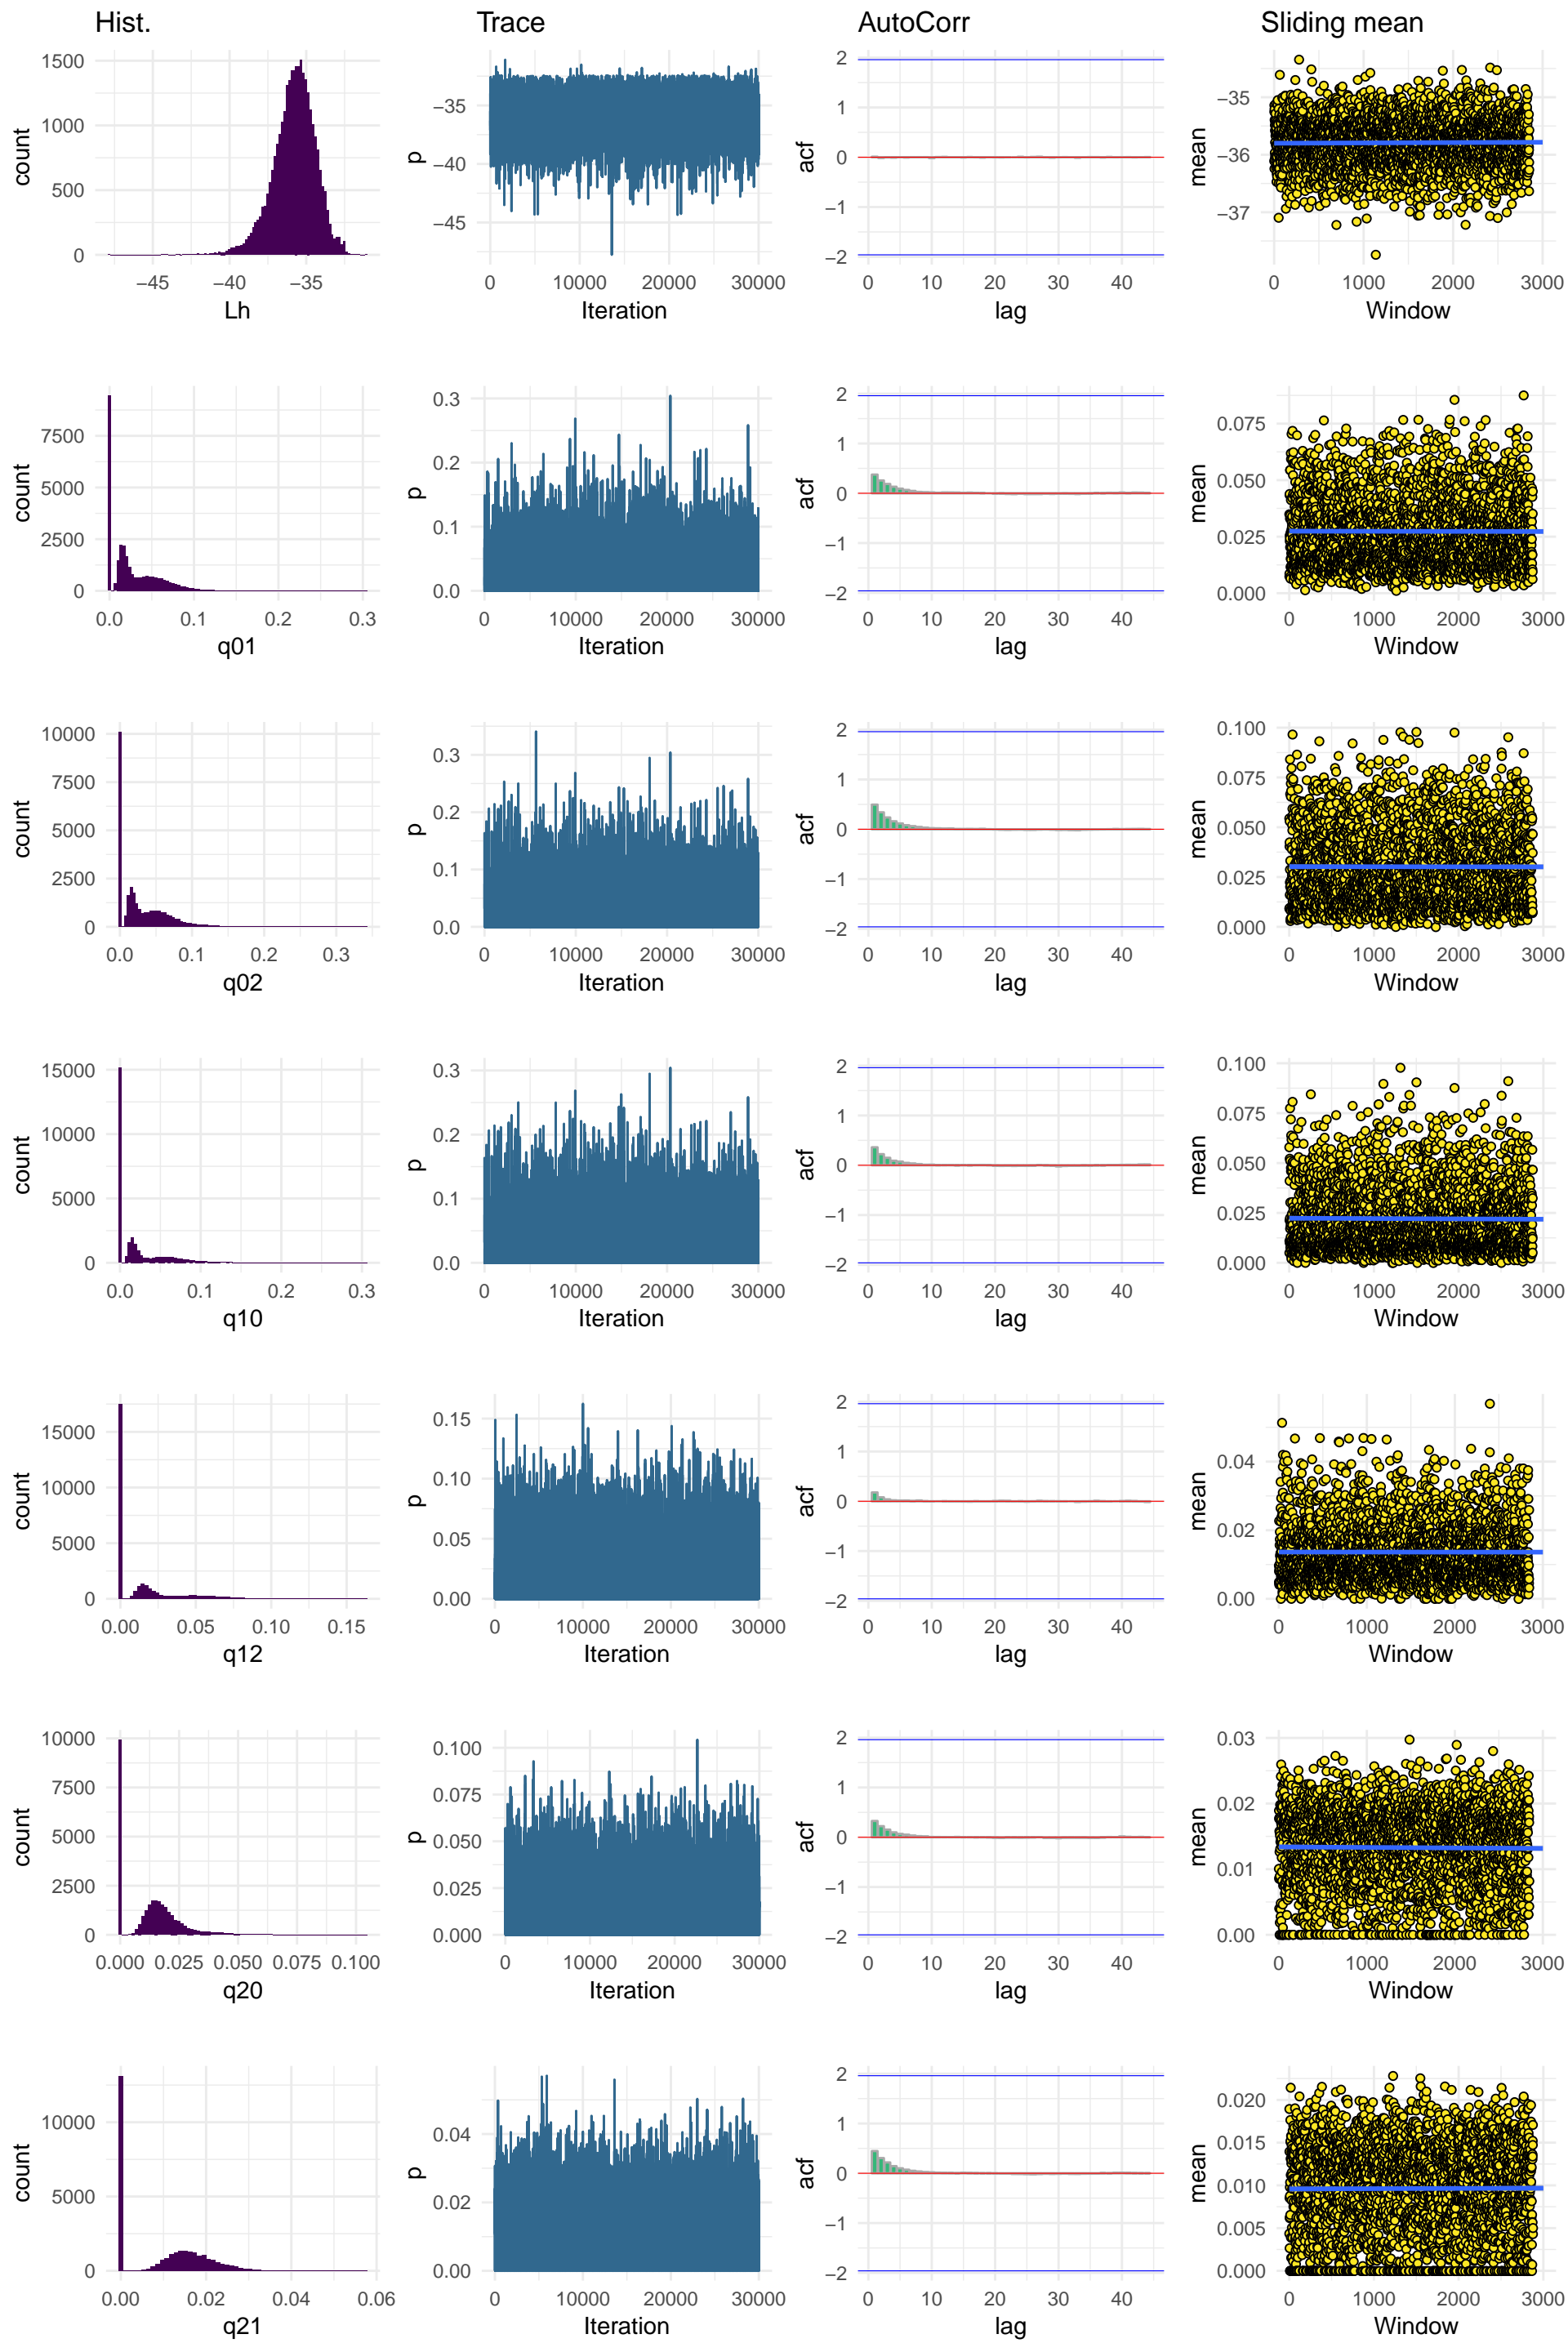

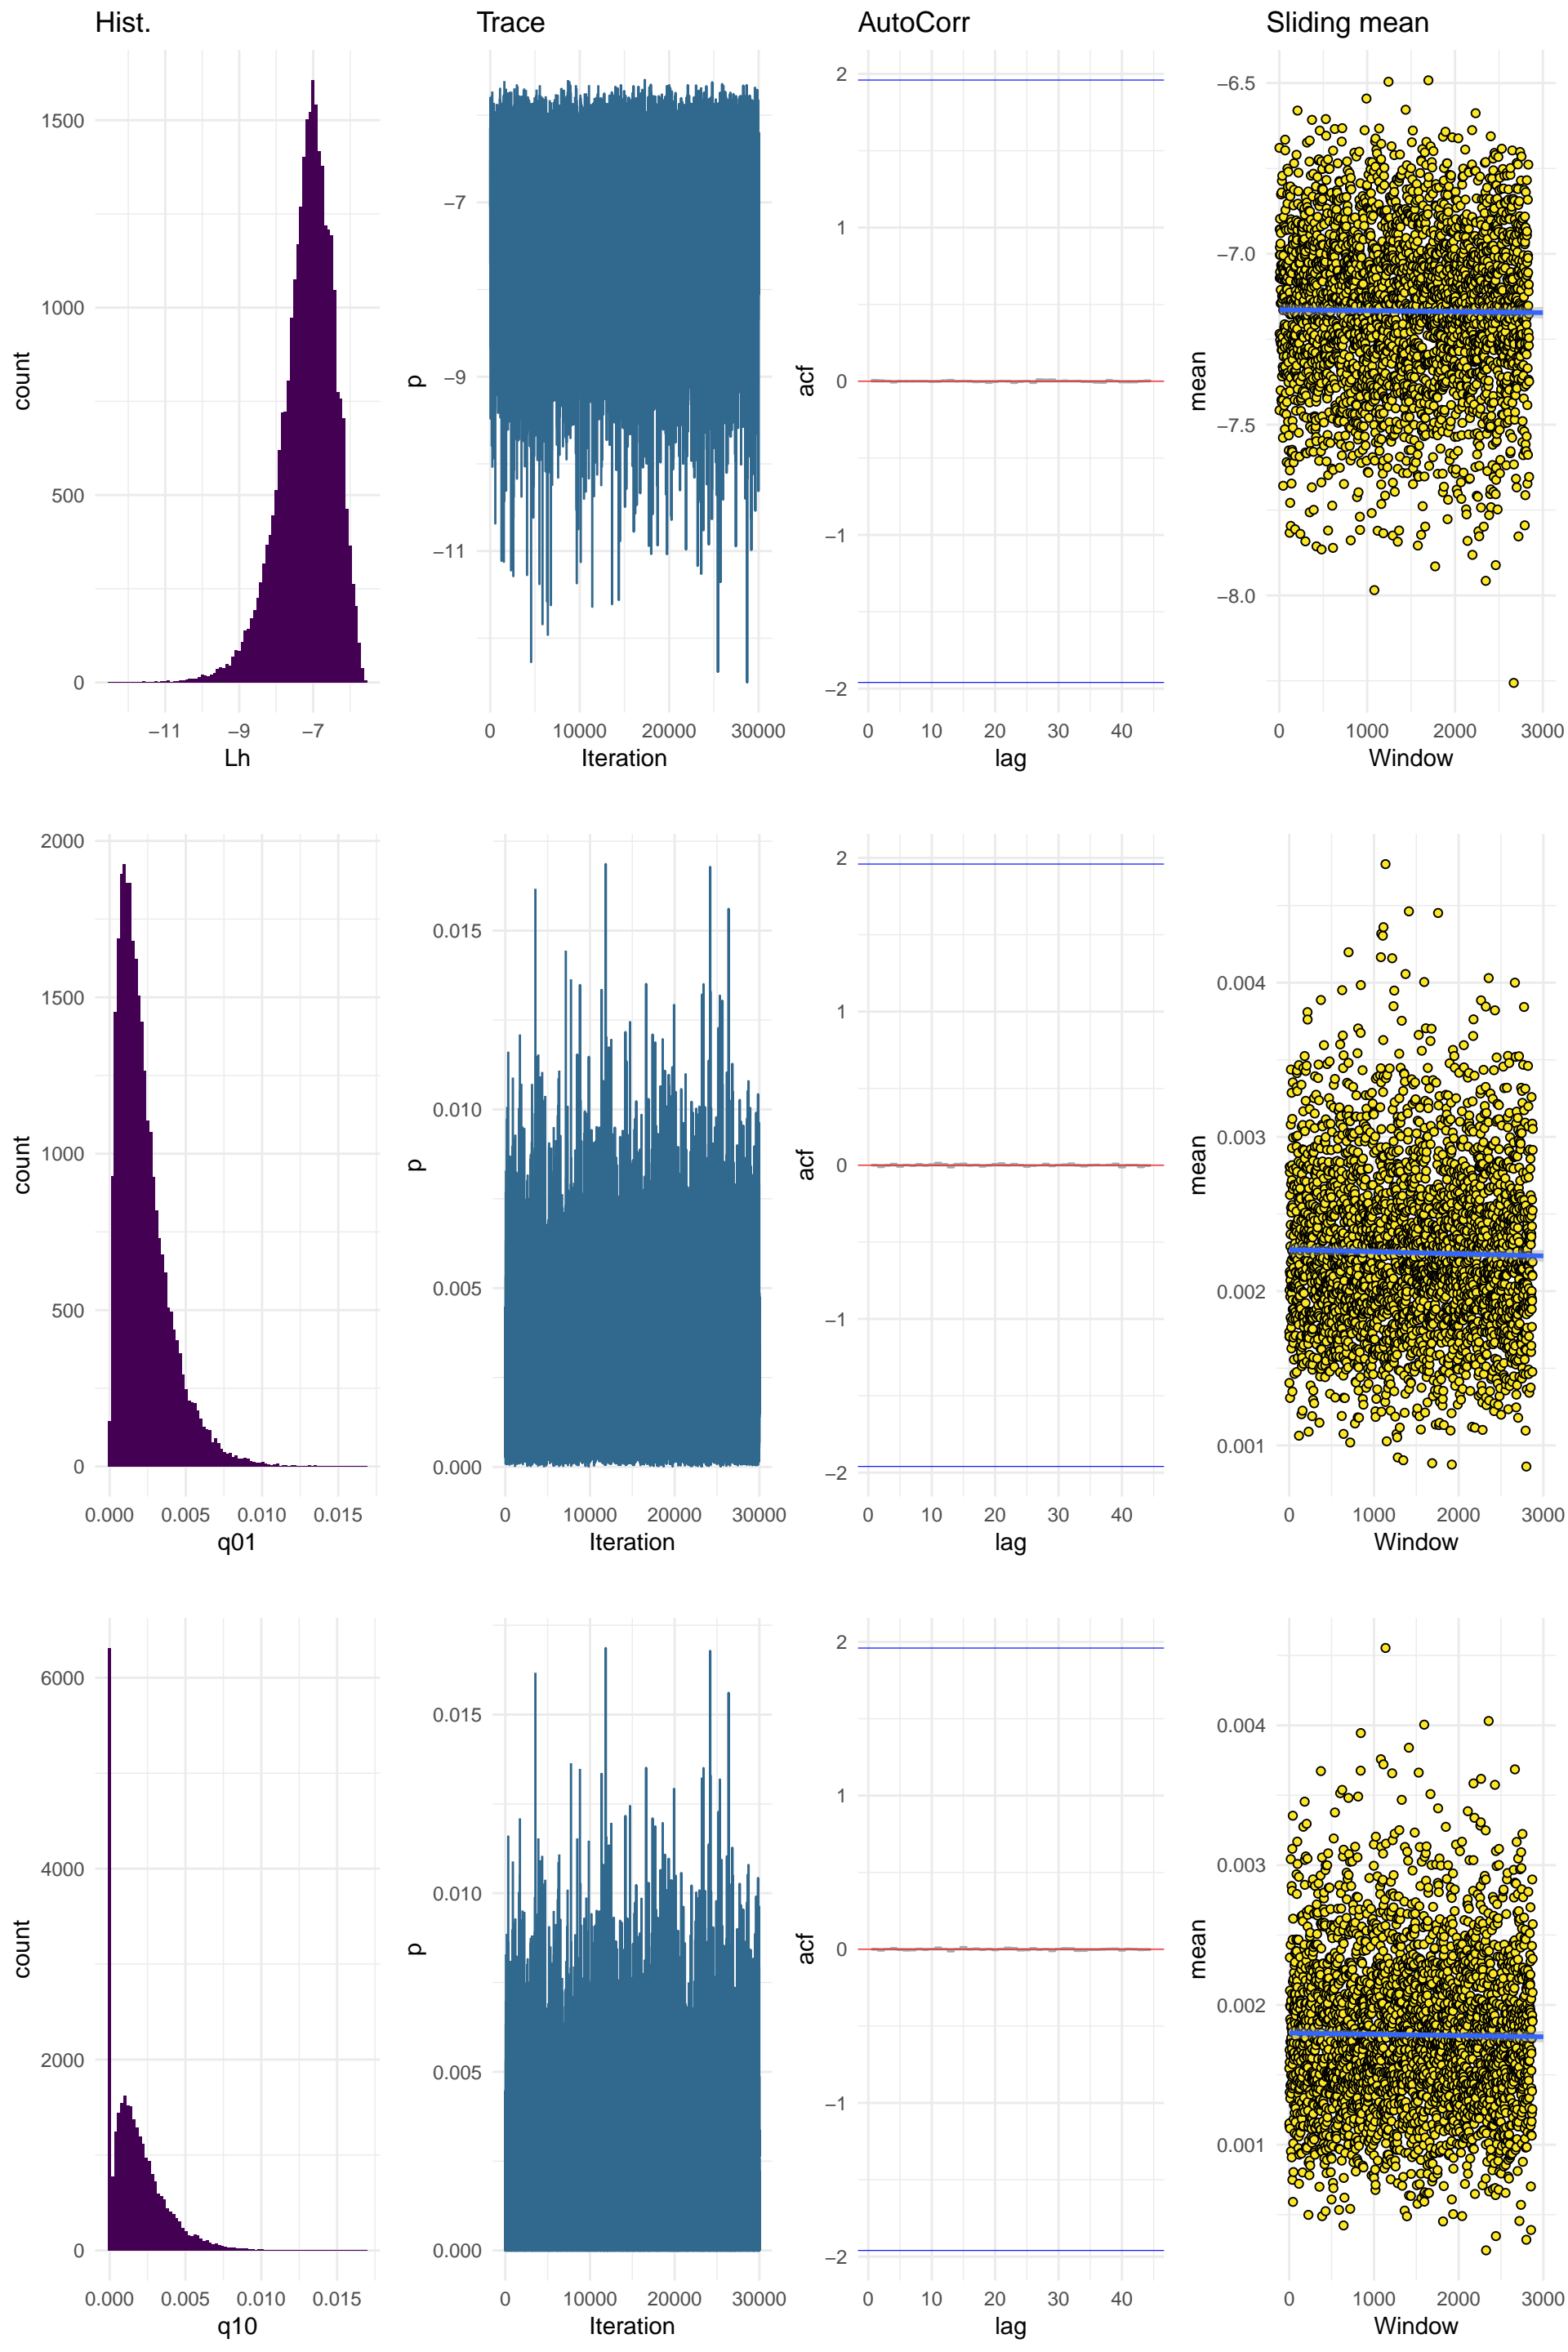

Hist.

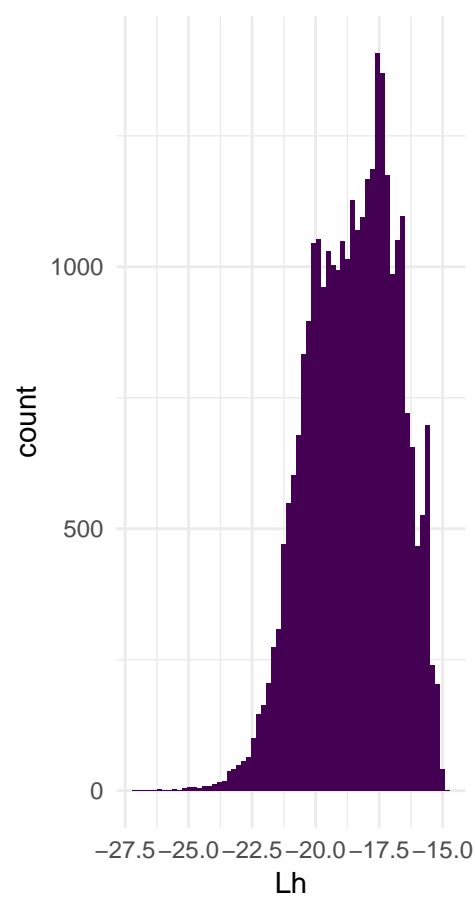

Trace

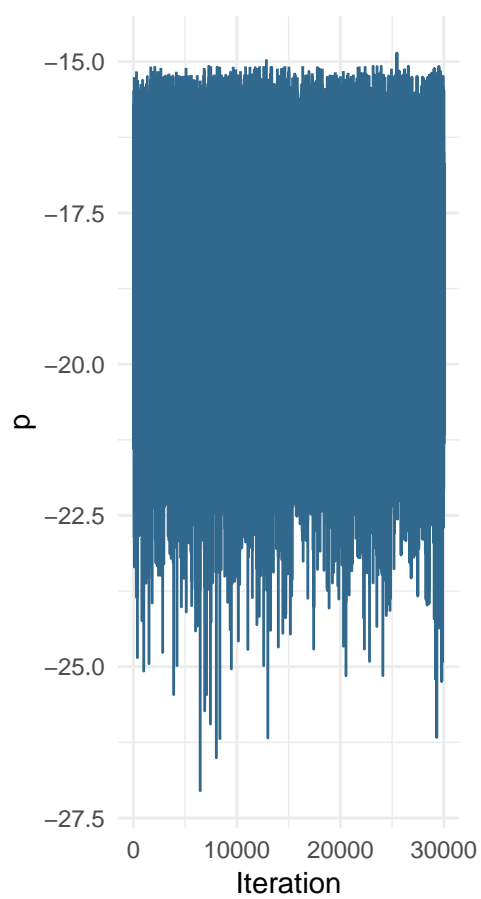

AutoCorr

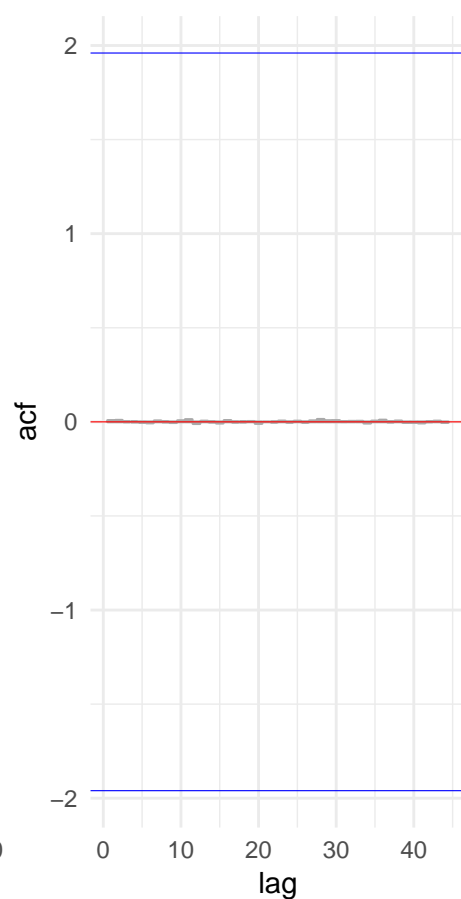

Sliding mean

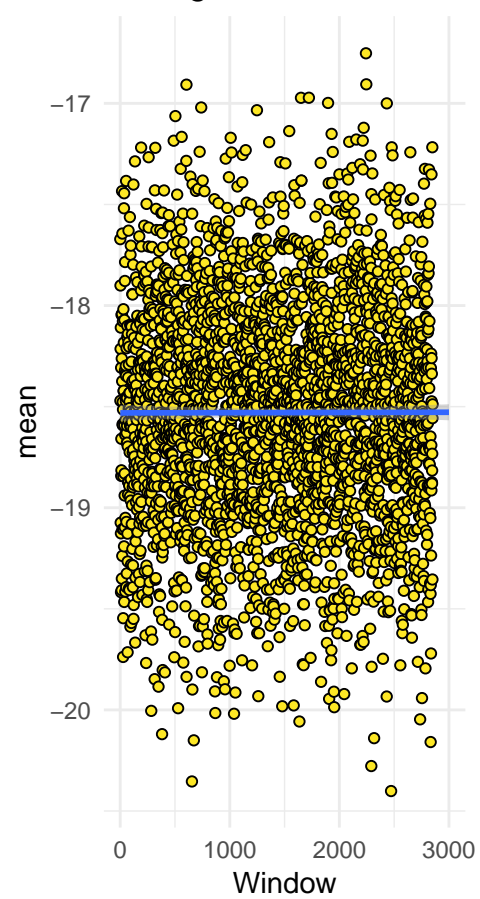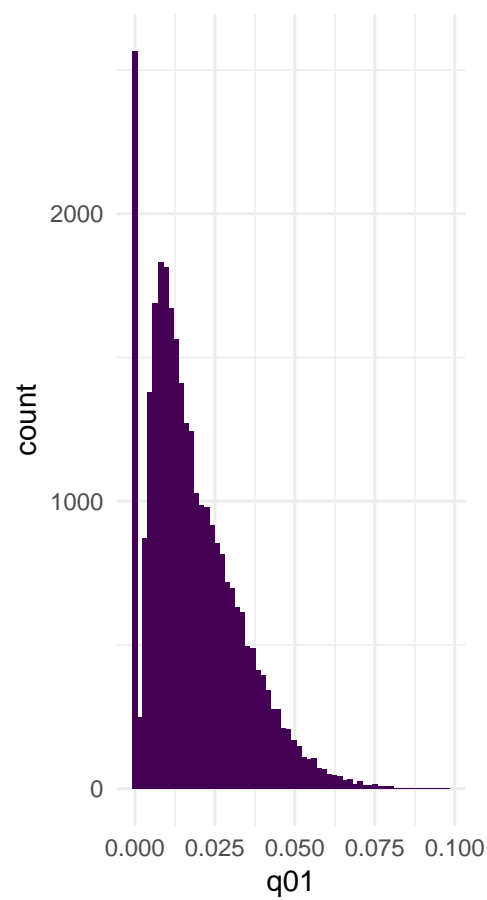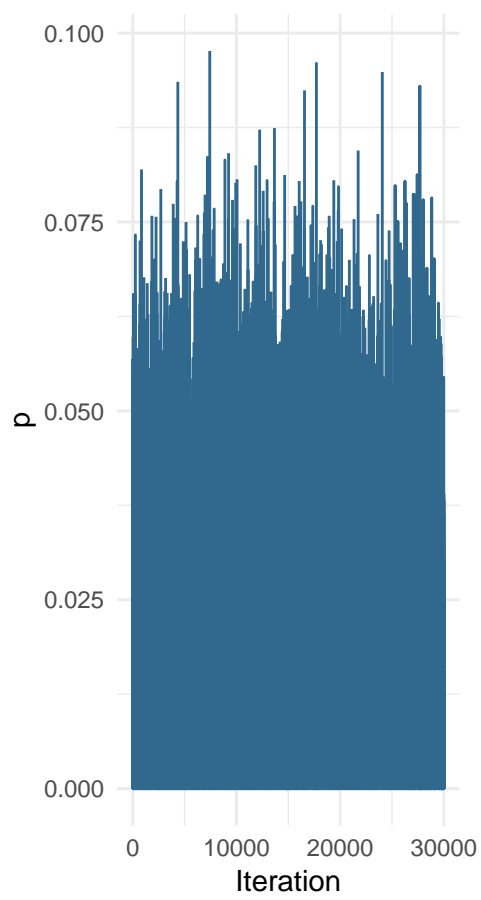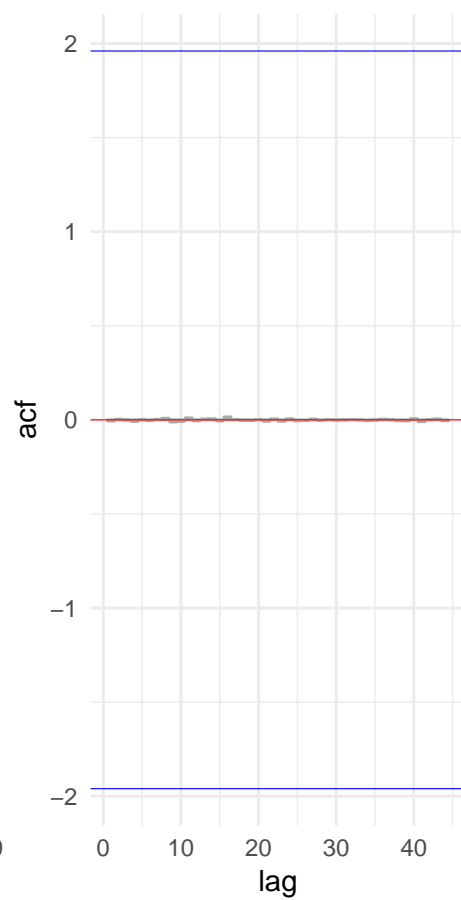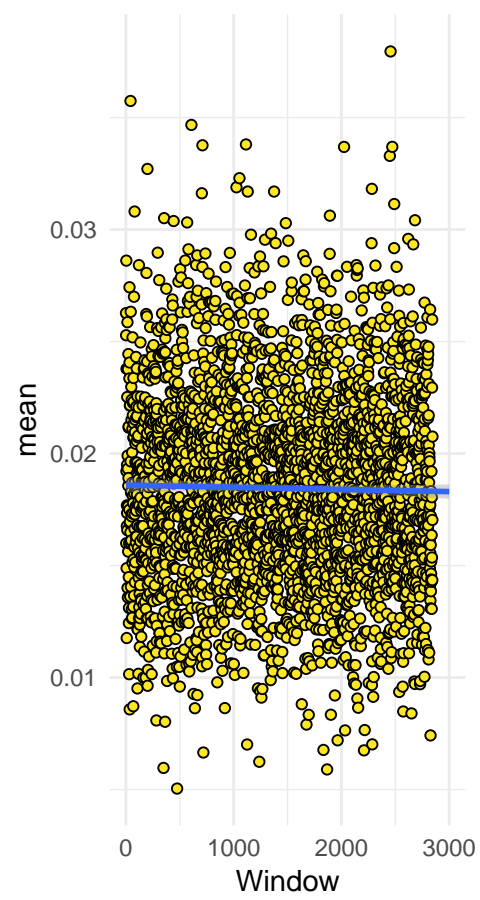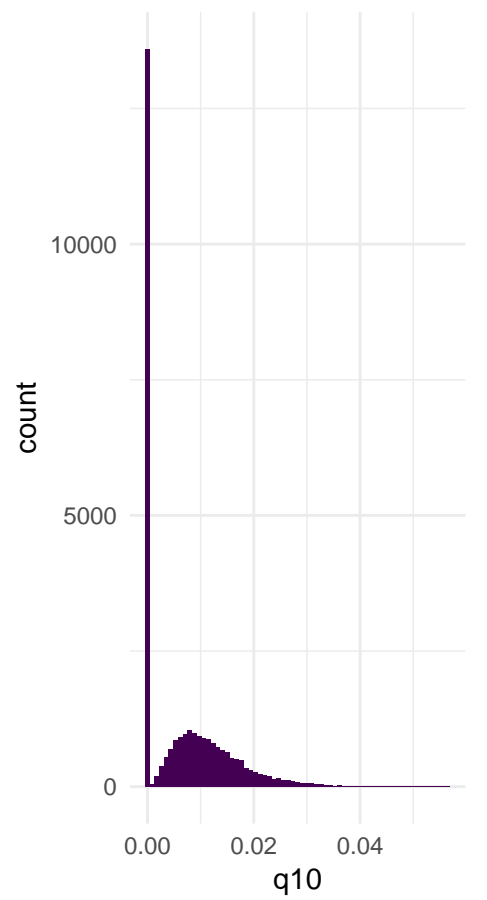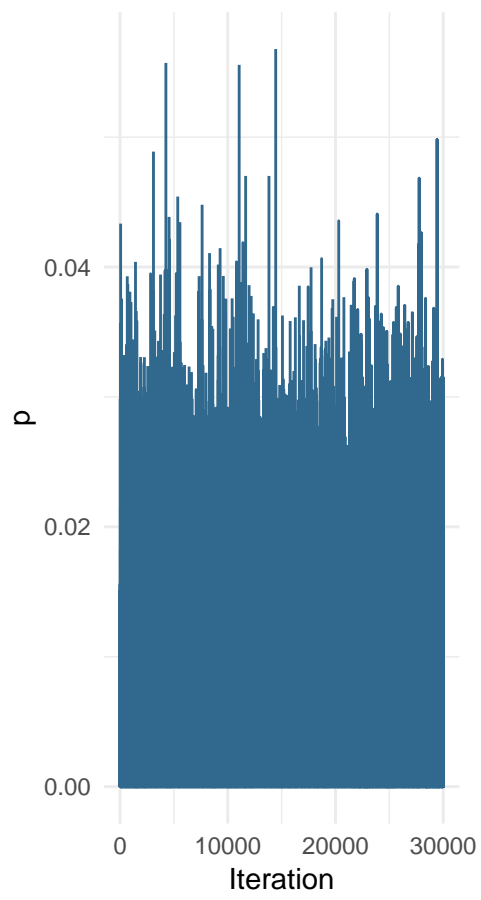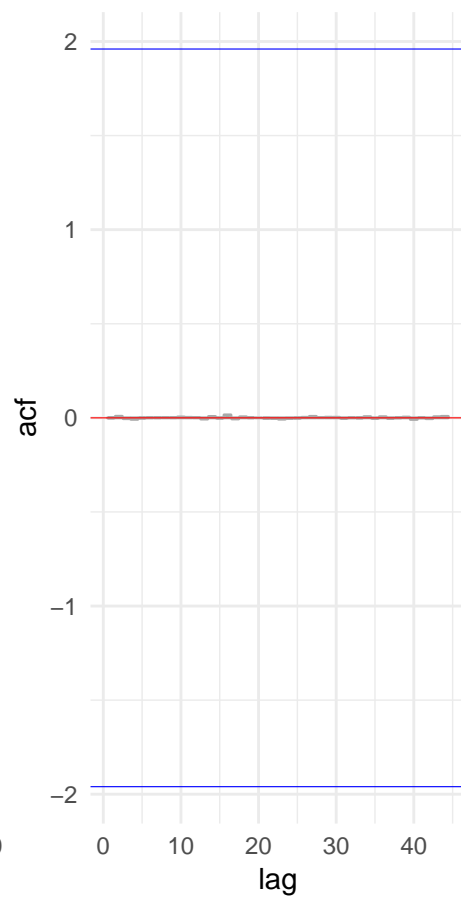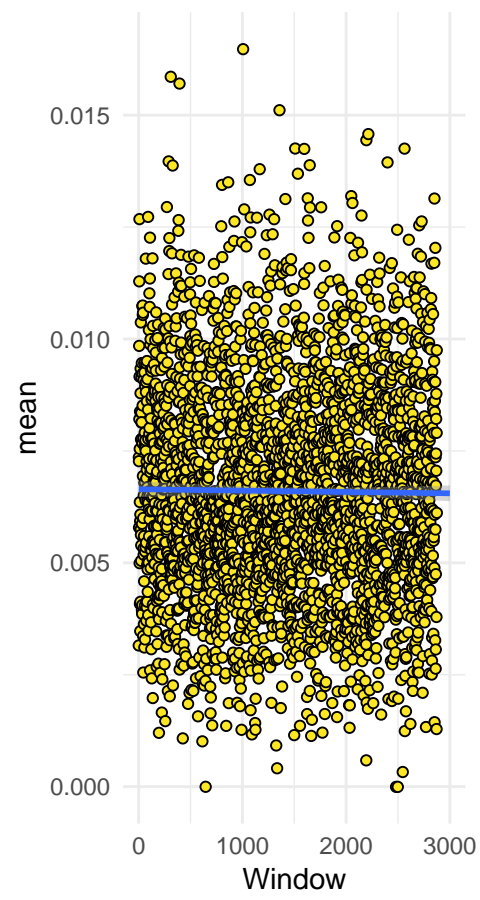

**Appendix S15.** The genera previously recognized in the *Lepanthes* clade in the 50% majority-rule consensus tree based on BI analysis of the concatenated dataset. Labels of the genera follow the former generic names proposed<sup>15,30,39</sup>. Plotted branch values for PBP, LPB and PP are given for each well-supported clade of interest. Letters represent genera and numbers clades grouping the genera (see Fig. 3 for the updated proposed classification).

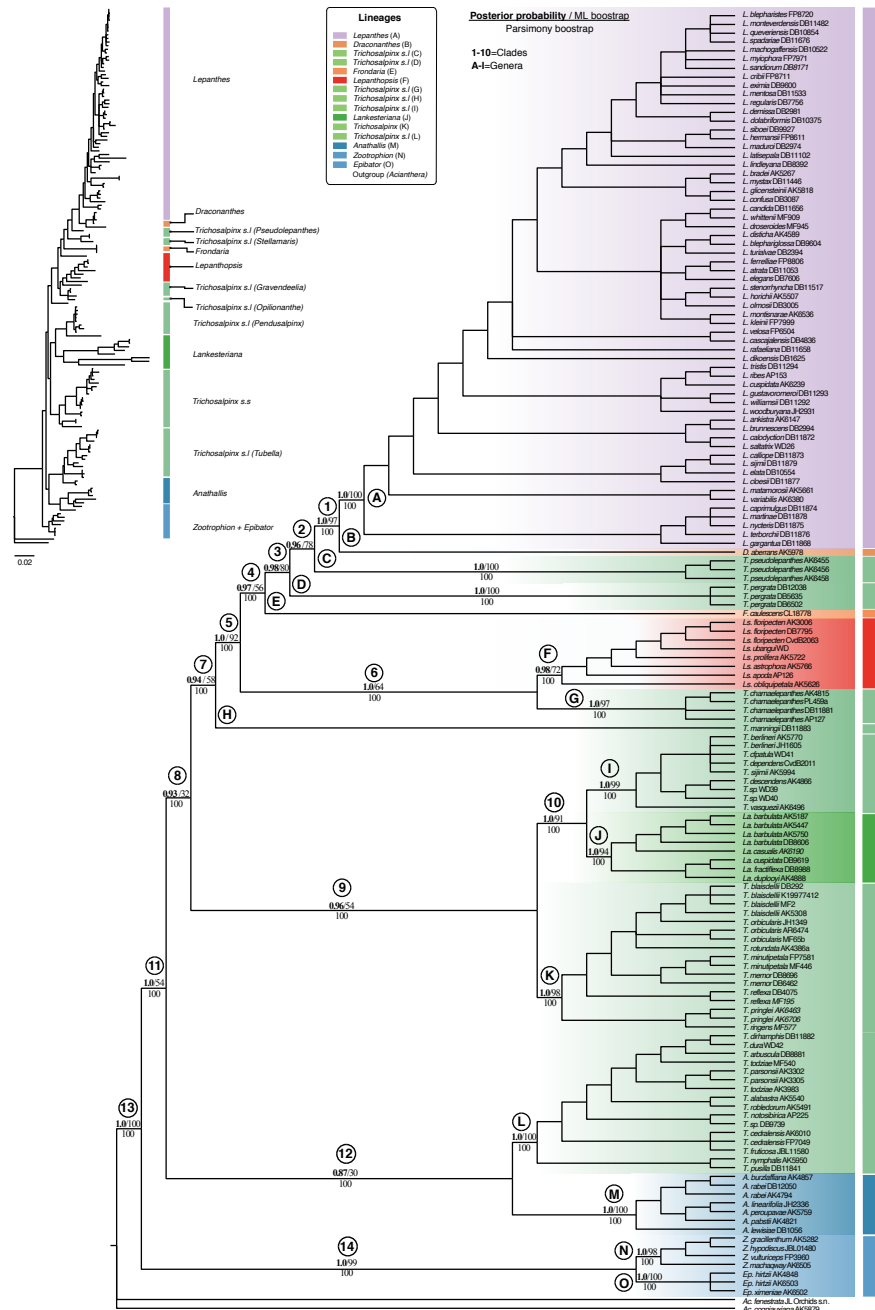

Supplement: 41598_2019_51360_MOESM1_ESM.pdf [file 41598_2019_51360_MOESM1_ESM.pdf]
